# Supplementary material for: Targeted Metabolomics Provide Chemotaxonomic Insights of Medicago ruthenica, with Coupled Transcriptomics Elucidating the Mechanism Underlying Floral Coloration
Source: Plants (Basel). 2022 Sep 15;11(18):2408. doi: 10.3390/plants11182408 (PMC9505912; doi:10.3390/plants11182408)
Supplement: Supplementary file 1 [file plants-11-02408-s001.zip › Supplementary Tables.xlsx]

## Sheet: Table S1
Table S1. Statistic Reads of RNA-Seq data
	Sample name						Total clean data
	PFM-1	PFM-2	PFM-3	YFM-1	YFM-2	YFM-3
Total Reads	42274510	41116718	44442690	64109640	43082772	46602464	42.11Gb
Unigenes	21137255	20558359	22221345	32054820	21541386	23301232
BaseSum	6328097592	6147323266	6636581898	9590656764	6439827204	6966374770
Mapped Reads	0.8618	0.8634	0.8635	0.8436	0.8443	0.8459
GC content(%)	42.79	42.48	42.51	42.83	43.1	42.62
Q20(%)	98.59	98.49	98.54	98.42	98.51	98.5
Mean Q20(%)	98.54			98.4767
Q30(%)	95.63	95.32	95.51	95.1	95.36	95.3
Mean Q30(%)	95.4867			95.2533
	1

## Sheet: Table S2
Table S2. Unigenes functional annotation statistics table
Database	Gene Number	Percentage %
COG_Annotation	11614	21.4
GO_Annotation	36566	67.2
KEGG_Annotation	27888	51.3
KOG_Annotation	20285	37.3
Pfam_Annotation	31798	58.5
Swissprot_Annotation	27429	50.4
eggNOG_Annotation	1327	2.4
nr_Annotation	45238	83.2
Total	45436	83.6

## Sheet: Table S3
Table S3 Result of GO database
GO_classify1	GO_classify2	All gene	DEGs
cellular component	extracellular region	859	91
cellular component	cell	17257	1006
cellular component	nucleoid	27	3
cellular component	membrane	11006	767
cellular component	cell junction	394	41
cellular component	membrane-enclosed lumen	1608	87
cellular component	macromolecular complex	4468	201
cellular component	organelle	12821	679
cellular component	other organism	319	21
cellular component	other organism part	319	21
cellular component	extracellular region part	110	9
cellular component	organelle part	4887	252
cellular component	membrane part	9578	674
cellular component	synapse part	12	0
cellular component	cell part	17257	1006
cellular component	synapse	14	0
cellular component	symplast	379	40
cellular component	supramolecular complex	266	10
molecular function	transcription factor activity, protein binding	246	11
molecular function	nucleic acid binding transcription factor activity	1243	51
molecular function	catalytic activity	17203	1341
molecular function	signal transducer activity	410	21
molecular function	structural molecule activity	639	33
molecular function	transporter activity	2139	204
molecular function	binding	18995	1291
molecular function	electron carrier activity	235	17
molecular function	antioxidant activity	254	26
molecular function	metallochaperone activity	4	1
molecular function	protein tag	20	1
molecular function	translation regulator activity	4	0
molecular function	nutrient reservoir activity	89	9
molecular function	molecular transducer activity	328	18
molecular function	molecular function regulator	788	52
biological process	reproduction	1082	70
biological process	immune system process	149	4
biological process	behavior	8	1
biological process	metabolic process	16979	1143
biological process	cellular process	16952	1054
biological process	reproductive process	1079	70
biological process	biological adhesion	8	0
biological process	signaling	1606	105
biological process	multicellular organismal process	1176	57
biological process	developmental process	1334	78
biological process	growth	133	4
biological process	locomotion	40	7
biological process	single-organism process	11026	886
biological process	rhythmic process	28	1
biological process	response to stimulus	4608	357
biological process	localization	3950	300
biological process	multi-organism process	697	43
biological process	biological regulation	7466	432
biological process	cellular component organization or biogenesis	3927	243
biological process	detoxification	271	27
Total Genes		36566	2493

## Sheet: Table S4
Table S4 KEGG Pathway analysis
#pathway	pathway_id	Gene_number	Gene_id	KOs
Glycolysis / Gluconeogenesis	ko00010	270	Medicago_ruthenica_newGene_3736;Medicago_ruthenica_newGene_3737;Medicago_ruthenica_newGene_4145;Medicago_ruthenica_newGene_4947;Medicago_ruthenica_newGene_5315;Medicago_ruthenica_newGene_5385;Medicago_ruthenica_newGene_6603;Medicago_ruthenica_newGene_7069;Medicago_ruthenica_newGene_7943;Medicago_ruthenica_newGene_808;Medicago_ruthenica_newGene_8088;Medicago_ruthenica_newGene_8934;Medicago_rutheni…	K01623+K01623+K01689+K01568+K00162+K01568+K01568+K00134+K01568+K00121+K01689+K01568+K00121+K00844+K00121+K00131+K01803+K00128+K00895+K00162+K00162+K00873+K01623+K00844+K00873+K00131+K00128+K00128+K00128+K00850+K00850+K00131+K00627+K00873+K00850+K01835+K00627+K00627+K00873+K01835+K00161+K00873+K01623+K01810+K00627+K03841+K00895+K00895+K00895+K00895+K00895+K00895+K00895+K00382+K00128+K00850+K00895+…
Citrate cycle (TCA cycle)	ko00020	119	Medicago_ruthenica_newGene_5315;Medicago_ruthenica_newGene_8792;MruG001498;MruG001815;MruG001825;MruG001870;MruG002153;MruG002675;MruG002977;MruG003415;MruG003833;MruG003834;MruG003881;MruG004101;MruG004668;MruG004934;MruG005169;MruG005170;MruG005835;MruG006187;MruG006466;MruG006481;MruG006482;MruG006726;MruG008549;MruG008580;MruG008709;MruG008931;MruG008935;MruG009456;MruG009525;MruG009530;MruG0…	K00162+K00658+K00164+K00162+K00162+K01647+K00025+K00030+K00026+K01900+K01681+K01681+K00025+K00025+K01679+K00627+K00627+K00627+K00161+K00627+K00164+K00164+K00164+K00658+K01648+K00382+K00236+K01647+K01647+K01647+K00031+K01648+K00164+K01681+K00161+K00161+K01610+K00026+K01647+K00161+K00026+K01610+K00161+K00162+K01681+K01681+K01681+K00161+K00030+K01610+K01647+K01610+K01610+K01681+K00236+K00026+K00162+…
Pentose phosphate pathway	ko00030	110	Medicago_ruthenica_newGene_3736;Medicago_ruthenica_newGene_3737;MruG000753;MruG001266;MruG001267;MruG001658;MruG002849;MruG003975;MruG004825;MruG004826;MruG004932;MruG004965;MruG005095;MruG005149;MruG005572;MruG005994;MruG006050;MruG006127;MruG006557;MruG006805;MruG007480;MruG007482;MruG007483;MruG007484;MruG007680;MruG007682;MruG007968;MruG008449;MruG008929;MruG008964;MruG008967;MruG008974;MruG0…	K01623+K01623+K00131+K01057+K01057+K00895+K01623+K00131+K00850+K00850+K00131+K00850+K01835+K01807+K01835+K01807+K01623+K01810+K00615+K03841+K00895+K00895+K00895+K00895+K00895+K00895+K00895+K01807+K00850+K00895+K00895+K00895+K00850+K00852+K00850+K00850+K01783+K00895+K01783+K00895+K00850+K00850+K01057+K00850+K00850+K00615+K00850+K01623+K01623+K03841+K00616+K00033+K00033+K00850+K01835+K00850+K01783+…
Pentose and glucuronate interconversions	ko00040	400	Medicago_ruthenica_newGene_1150;Medicago_ruthenica_newGene_2966;Medicago_ruthenica_newGene_3070;Medicago_ruthenica_newGene_3095;Medicago_ruthenica_newGene_3100;Medicago_ruthenica_newGene_3855;Medicago_ruthenica_newGene_387;Medicago_ruthenica_newGene_4044;Medicago_ruthenica_newGene_4166;Medicago_ruthenica_newGene_522;Medicago_ruthenica_newGene_523;Medicago_ruthenica_newGene_5571;Medicago_ruthenica…	K12447+K01184+K12447+K12447+K01184+K12447+K01184+K12447+K12447+K12447+K12447+K01213+K12447+K01184+K12447+K12447+K12447+K12447+K12447+K12447+K01213+K01184+K12447+K01051+K01051+K01184+K01184+K01184+K01184+K01051+K01051+K01051+K01051+K01728+K01728+K12447+K01728+K01051+K01051+K01213+K01051+K01051+K01051+K01051+K01184+K01051+K01728+K01051+K01051+K01051+K01051+K01184+K01051+K01051+K01213+K01051+K01213+…
Fructose and mannose metabolism	ko00051	148	Medicago_ruthenica_newGene_3736;Medicago_ruthenica_newGene_3737;Medicago_ruthenica_newGene_3878;Medicago_ruthenica_newGene_4672;Medicago_ruthenica_newGene_7751;MruG000109;MruG001004;MruG001409;MruG001658;MruG002849;MruG003296;MruG003427;MruG003428;MruG003430;MruG003434;MruG003533;MruG003944;MruG004476;MruG004477;MruG004478;MruG004481;MruG004483;MruG004825;MruG004826;MruG004965;MruG005568;MruG0060…	K01623+K01623+K00966+K00847+K00966+K00844+K01803+K18447+K00895+K01623+K00844+K00847+K00847+K00847+K00847+K00847+K00847+K19355+K19355+K19355+K19355+K19355+K00850+K00850+K00850+K00847+K01623+K03841+K01805+K00895+K00895+K00895+K00895+K00895+K00895+K00895+K00850+K00895+K00895+K00895+K00850+K00850+K00850+K19355+K01803+K00847+K00844+K00895+K00895+K00850+K01103+K01103+K01103+K00850+K00966+K00966+K00850+…
Galactose metabolism	ko00052	215	Medicago_ruthenica_newGene_1150;Medicago_ruthenica_newGene_3070;Medicago_ruthenica_newGene_3095;Medicago_ruthenica_newGene_3855;Medicago_ruthenica_newGene_4044;Medicago_ruthenica_newGene_4166;Medicago_ruthenica_newGene_522;Medicago_ruthenica_newGene_523;Medicago_ruthenica_newGene_5856;Medicago_ruthenica_newGene_5881;Medicago_ruthenica_newGene_5986;Medicago_ruthenica_newGene_6051;Medicago_ruthenic…	K12447+K12447+K12447+K12447+K12447+K12447+K12447+K12447+K12447+K00965+K01193+K18819+K12447+K12447+K12447+K12447+K12447+K12447+K00965+K12447+K00844+K12309+K18819+K12309+K12309+K01193+K01193+K01193+K01193+K12309+K12309+K12309+K12447+K12309+K01193+K00844+K12309+K07407+K07407+K07407+K12309+K18819+K18819+K18819+K00850+K00850+K00850+K12309+K01835+K06611+K01835+K12309+K07407+K01187+K01187+K01193+K00850+…
Ascorbate and aldarate metabolism	ko00053	144	Medicago_ruthenica_newGene_1150;Medicago_ruthenica_newGene_2576;Medicago_ruthenica_newGene_3070;Medicago_ruthenica_newGene_3095;Medicago_ruthenica_newGene_3504;Medicago_ruthenica_newGene_3855;Medicago_ruthenica_newGene_4044;Medicago_ruthenica_newGene_4166;Medicago_ruthenica_newGene_4687;Medicago_ruthenica_newGene_4694;Medicago_ruthenica_newGene_4695;Medicago_ruthenica_newGene_4730;Medicago_ruthen…	K12447+K00423+K12447+K12447+K08232+K12447+K12447+K12447+K00423+K00423+K00423+K00423+K00423+K00423+K00423+K00423+K00423+K00423+K12447+K12447+K12447+K12447+K12447+K12447+K12447+K12447+K12447+K00423+K12447+K00423+K00103+K00103+K00103+K00128+K12447+K08232+K00434+K00434+K00434+K10046+K00128+K00128+K00128+K00434+K16190+K00434+K21888+K00434+K00434+K10047+K10047+K10047+K00128+K00128+K14085+K14085+K14085+…
Fatty acid biosynthesis	ko00061	77	MruG001307;MruG001380;MruG001644;MruG002488;MruG003359;MruG004258;MruG004560;MruG005636;MruG005637;MruG005745;MruG006046;MruG006047;MruG006679;MruG006870;MruG007285;MruG009305;MruG011416;MruG011596;MruG012080;MruG014291;MruG015166;MruG015741;MruG015872;MruG015873;MruG015878;MruG015880;MruG015983;MruG016187;MruG016378;MruG016952;MruG018640;MruG018903;MruG018994;MruG019215;MruG019893;MruG020160;Mru…	K03921+K01897+K01897+K00059+K09458+K00059+K01897+K09458+K09458+K01897+K10781+K10781+K02372+K02372+K00648+K09458+K07512+K00665+K00648+K00645+K11262+K01897+K01897+K01897+K01897+K01897+K00059+K01897+K03921+K10781+K00648+K18660+K18660+K00059+K10781+K03921+K09458+K00645+K00665+K01897+K00208+K03921+K09458+K00648+K01897+K01897+K09458+K01961+K01897+K01897+K01897+K01897+K10781+K02160+K02160+K01962+K02160+…
Fatty acid elongation	ko00062	61	Medicago_ruthenica_newGene_174;MruG000222;MruG002001;MruG003916;MruG005584;MruG006168;MruG006513;MruG006748;MruG007209;MruG008754;MruG009663;MruG011416;MruG011443;MruG015090;MruG015091;MruG015092;MruG016013;MruG016015;MruG016016;MruG017534;MruG018053;MruG018398;MruG018442;MruG020801;MruG020853;MruG020861;MruG020863;MruG020864;MruG020867;MruG020868;MruG021332;MruG024097;MruG024098;MruG026193;MruG0…	K15397+K15397+K15397+K15397+K15397+K15397+K15397+K15397+K15397+K15397+K15397+K07512+K15397+K15397+K15397+K15397+K10251+K10251+K10251+K15397+K15397+K15397+K15397+K10703+K15397+K15397+K15397+K15397+K15397+K15397+K15397+K10251+K10251+K01074+K15397+K15397+K15397+K15397+K10258+K15397+K15397+K01074+K01068+K15397+K10249+K15397+K01068+K15397+K10703+K15397+K15397+K15397+K15397+K15397+K10251+K15397+K07512+…
Fatty acid degradation	ko00071	118	Medicago_ruthenica_newGene_3791;Medicago_ruthenica_newGene_808;Medicago_ruthenica_newGene_9567;MruG000476;MruG000741;MruG000998;MruG001354;MruG001380;MruG001644;MruG002323;MruG003103;MruG004312;MruG004314;MruG004316;MruG004560;MruG004586;MruG005468;MruG005469;MruG005506;MruG005586;MruG005588;MruG005589;MruG005594;MruG005595;MruG005745;MruG007193;MruG008720;MruG008737;MruG008739;MruG008740;MruG008…	K20495+K00121+K00121+K07517+K00121+K07517+K00128+K01897+K01897+K07513+K07517+K00128+K00128+K00128+K01897+K07517+K07425+K07425+K07425+K20495+K20495+K20495+K20495+K20495+K01897+K07517+K00249+K10527+K10527+K10527+K10527+K00128+K00128+K14085+K14085+K14085+K14085+K00128+K15401+K07517+K07517+K00128+K07425+K01897+K00626+K01897+K01897+K01897+K01897+K01897+K00128+K00121+K07517+K00626+K07513+K00121+K07517+…
Synthesis and degradation of ketone bodies	ko00072	15	MruG013202;MruG013209;MruG015748;MruG019142;MruG026068;MruG026069;MruG030446;MruG030454;MruG030528;MruG031172;MruG037494;MruG037503;MruG045447;MruG047536;MruG047919;	K01640+K01640+K00626+K00626+K01641+K01641+K01640+K01640+K01640+K00626+K01640+K01640+K00626+K00626+K00626
Cutin, suberine and wax biosynthesis	ko00073	94	Medicago_ruthenica_newGene_3791;MruG001037;MruG001693;MruG001694;MruG001717;MruG001724;MruG001725;MruG001726;MruG001727;MruG001729;MruG001734;MruG001735;MruG001737;MruG001842;MruG001843;MruG001844;MruG001846;MruG001941;MruG001942;MruG001944;MruG001945;MruG001946;MruG003183;MruG003722;MruG003814;MruG004955;MruG005586;MruG005588;MruG005589;MruG005594;MruG005595;MruG010730;MruG010733;MruG011718;MruG…	K20495+K15406+K15402+K15405+K15405+K15402+K15405+K15405+K15405+K15405+K15405+K15405+K15405+K15402+K15402+K15402+K15402+K15405+K15405+K15405+K15405+K15405+K13356+K17991+K20769+K21995+K20495+K20495+K20495+K20495+K20495+K13356+K13356+K15403+K15404+K15401+K15400+K15400+K15400+K15400+K15400+K15400+K15405+K13356+K13356+K15402+K15405+K15405+K15400+K15398+K15406+K20495+K15401+K13356+K13356+K17991+K15405+…
Steroid biosynthesis	ko00100	63	Medicago_ruthenica_newGene_8476;MruG000006;MruG002837;MruG004631;MruG005949;MruG006668;MruG007010;MruG007628;MruG012939;MruG013168;MruG013169;MruG015257;MruG015639;MruG015642;MruG015643;MruG015644;MruG017401;MruG017528;MruG018245;MruG018577;MruG021162;MruG021451;MruG021713;MruG021714;MruG022990;MruG023113;MruG025206;MruG025675;MruG027750;MruG029028;MruG029029;MruG030157;MruG030161;MruG032211;MruG…	K00511+K23558+K00222+K14674+K01052+K23558+K00511+K09832+K00559+K14674+K14674+K08246+K01052+K01052+K01052+K01052+K00511+K23558+K08242+K00213+K23558+K00801+K09828+K09828+K00511+K05917+K01052+K01052+K14424+K01052+K01052+K01052+K01052+K00227+K00227+K01052+K01052+K14674+K01824+K01052+K01853+K01853+K01853+K01052+K01853+K14423+K01052+K01052+K01052+K23558+K14674+K05917+K14424+K14423+K01052+K14674+K01052+…
Ubiquinone and other terpenoid-quinone biosynthesis	ko00130	85	Medicago_ruthenica_newGene_6230;Medicago_ruthenica_newGene_8536;MruG000219;MruG000679;MruG002730;MruG002733;MruG002734;MruG003165;MruG003169;MruG003581;MruG003702;MruG003924;MruG006194;MruG007037;MruG007561;MruG008319;MruG008837;MruG010419;MruG010472;MruG010504;MruG010762;MruG011165;MruG011408;MruG011510;MruG013451;MruG014499;MruG015193;MruG015262;MruG015263;MruG017836;MruG017930;MruG018028;MruG0…	K09833+K09833+K00457+K05928+K01904+K01904+K01904+K12501+K12501+K12502+K01904+K12502+K00487+K03809+K00815+K14760+K00815+K23095+K03809+K03809+K09833+K00815+K01904+K19222+K01904+K00815+K23095+K01904+K01904+K09834+K00815+K06125+K01904+K06127+K18606+K18606+K18606+K01904+K03809+K03809+K02552+K01904+K18534+K14759+K03809+K23094+K01904+K14759+K17872+K01904+K03809+K01904+K01904+K01904+K01904+K01904+K00487+…
Oxidative phosphorylation	ko00190	263	Medicago_ruthenica_newGene_4115;Medicago_ruthenica_newGene_4996;Medicago_ruthenica_newGene_7556;MruG000838;MruG000946;MruG000949;MruG000950;MruG000952;MruG000953;MruG001528;MruG001579;MruG001736;MruG001948;MruG002273;MruG002505;MruG002653;MruG003088;MruG003145;MruG003266;MruG003375;MruG004322;MruG004406;MruG005141;MruG005155;MruG005157;MruG005187;MruG005196;MruG005993;MruG006020;MruG006021;MruG00…	K02153+K02146+K02153+K00417+K01535+K01535+K01535+K01535+K01535+K02154+K02154+K02155+K02150+K11353+K01507+K02152+K02115+K02108+K02114+K03953+K05577+K03884+K02138+K03884+K03884+K02154+K01507+K03935+K02133+K02133+K02111+K01507+K03963+K02147+K00416+K02115+K01507+K03955+K03955+K02115+K00236+K01535+K02112+K03958+K02140+K02110+K05574+K05582+K05581+K02260+K02260+K02154+K02136+K02136+K02154+K02154+K02140+…
Photosynthesis	ko00195	132	Medicago_ruthenica_newGene_606;Medicago_ruthenica_newGene_6782;MruG000540;MruG001179;MruG001341;MruG002988;MruG003088;MruG003145;MruG003266;MruG003293;MruG003343;MruG003377;MruG003558;MruG004071;MruG004321;MruG005168;MruG005733;MruG005992;MruG006154;MruG006253;MruG006256;MruG006491;MruG006713;MruG006849;MruG006851;MruG006853;MruG006953;MruG007855;MruG008240;MruG008317;MruG009811;MruG009916;MruG00…	K08901+K02704+K02704+K02698+K02721+K02704+K02115+K02108+K02114+K02689+K02693+K08903+K02721+K02717+K02703+K02717+K02692+K02689+K02111+K02639+K02639+K02717+K02639+K02705+K02634+K02634+K02115+K02115+K02694+K02641+K03541+K02112+K02707+K02110+K08901+K02639+K02636+K08902+K02695+K02717+K08905+K02112+K02114+K02115+K02115+K02115+K02723+K03542+K02701+K02112+K02115+K02109+K02638+K02115+K02115+K02115+K02115+…
Photosynthesis - antenna proteins	ko00196	20	MruG000005;MruG006869;MruG009287;MruG010447;MruG013078;MruG014888;MruG017233;MruG019110;MruG019193;MruG023290;MruG031113;MruG031229;MruG031691;MruG031692;MruG031693;MruG032606;MruG032646;MruG033293;MruG040456;MruG048379;	K14172+K08917+K08908+K08914+K08910+K08915+K08911+K08915+K08912+K08912+K08913+K08909+K08912+K08912+K08912+K08912+K08907+K08916+K08908+K08911
Arginine biosynthesis	ko00220	73	Medicago_ruthenica_newGene_361;Medicago_ruthenica_newGene_563;Medicago_ruthenica_newGene_9458;MruG000197;MruG000265;MruG000271;MruG000769;MruG000809;MruG001621;MruG001622;MruG001895;MruG001900;MruG001903;MruG001905;MruG001906;MruG002774;MruG002777;MruG002782;MruG005629;MruG007736;MruG007738;MruG007739;MruG007742;MruG013300;MruG013314;MruG013316;MruG013323;MruG013326;MruG014318;MruG014650;MruG0152…	K14455+K14677+K01915+K00611+K00262+K00262+K00811+K00145+K00145+K00145+K14677+K14677+K14677+K14677+K14677+K01915+K01915+K01915+K14677+K01915+K01915+K01915+K01915+K14455+K14455+K14455+K14455+K14455+K01915+K01915+K01940+K01940+K01427+K01755+K00930+K14454+K00611+K01476+K01476+K00620+K13427+K13427+K14455+K14455+K14455+K00261+K01438+K14682+K14682+K14272+K01940+K00818+K14677+K14677+K01915+K01427+K01427+…
Purine metabolism	ko00230	232	Medicago_ruthenica_newGene_176;Medicago_ruthenica_newGene_2118;Medicago_ruthenica_newGene_2359;Medicago_ruthenica_newGene_4053;Medicago_ruthenica_newGene_4096;Medicago_ruthenica_newGene_4590;Medicago_ruthenica_newGene_5863;Medicago_ruthenica_newGene_6984;Medicago_ruthenica_newGene_7840;Medicago_ruthenica_newGene_8081;Medicago_ruthenica_newGene_8258;Medicago_ruthenica_newGene_8716;MruG000227;MruG0…	K01768+K01768+K01768+K01768+K01768+K01768+K01490+K13484+K02083+K01768+K18532+K01490+K01081+K00940+K00601+K18447+K00365+K00939+K00856+K00873+K18151+K00873+K11808+K01490+K19964+K24242+K00873+K01835+K00760+K00873+K01835+K13811+K03787+K00873+K01510+K01466+K01510+K00942+K01488+K18532+K02083+K02083+K02083+K10808+K00856+K01490+K00106+K03787+K00764+K00602+K00942+K00601+K00939+K01522+K01522+K13484+K01517+…
Caffeine metabolism	ko00232	2	MruG002393;MruG011561;	K00365+K00106
Pyrimidine metabolism	ko00240	118	Medicago_ruthenica_newGene_4359;MruG000031;MruG000034;MruG000227;MruG001098;MruG001927;MruG001929;MruG002820;MruG004648;MruG004834;MruG005713;MruG006393;MruG006674;MruG007263;MruG007694;MruG008034;MruG009342;MruG009520;MruG010328;MruG011688;MruG012534;MruG012819;MruG013396;MruG014523;MruG014531;MruG015782;MruG015783;MruG016782;MruG017964;MruG018052;MruG018418;MruG019348;MruG019494;MruG019638;MruG…	K00876+K00876+K00876+K01081+K00940+K01240+K01240+K09903+K01937+K24242+K03787+K00254+K01510+K01510+K01240+K00857+K10808+K01937+K00943+K03787+K13421+K13800+K00876+K01520+K13800+K00857+K00857+K01956+K00940+K01081+K13998+K00761+K13800+K00940+K16329+K13800+K13998+K13998+K01465+K01510+K00876+K01431+K01431+K00940+K00609+K13800+K10807+K10807+K10807+K10807+K09903+K00940+K00940+K01513+K01489+K03787+K03787+…
Alanine, aspartate and glutamate metabolism	ko00250	97	Medicago_ruthenica_newGene_2667;Medicago_ruthenica_newGene_361;Medicago_ruthenica_newGene_5611;Medicago_ruthenica_newGene_9458;MruG000265;MruG000271;MruG000769;MruG000860;MruG001189;MruG002774;MruG002777;MruG002782;MruG005023;MruG007736;MruG007738;MruG007739;MruG007742;MruG012442;MruG013300;MruG013314;MruG013316;MruG013323;MruG013326;MruG014184;MruG014318;MruG014331;MruG014605;MruG014650;MruG0150…	K00827+K14455+K00820+K01915+K00262+K00262+K00811+K00820+K00264+K01915+K01915+K01915+K13051+K01915+K01915+K01915+K01915+K00764+K14455+K14455+K14455+K14455+K14455+K01953+K01915+K00827+K01580+K01915+K01953+K01940+K01940+K01953+K01953+K01956+K01755+K13051+K13566+K14454+K00294+K00764+K01580+K00764+K16871+K16871+K14455+K00820+K14455+K14455+K00609+K01580+K00827+K00827+K00261+K00820+K00827+K14272+K01940+…
Glycine, serine and threonine metabolism	ko00260	155	Medicago_ruthenica_newGene_2667;Medicago_ruthenica_newGene_5559;MruG000571;MruG001672;MruG002804;MruG003567;MruG004103;MruG005550;MruG005551;MruG005717;MruG005722;MruG005725;MruG005727;MruG005731;MruG005971;MruG006301;MruG006723;MruG007534;MruG007535;MruG008554;MruG008580;MruG009262;MruG009264;MruG009266;MruG009268;MruG011670;MruG011866;MruG011892;MruG011923;MruG012060;MruG012154;MruG012751;MruG0…	K00827+K00108+K00281+K00276+K01754+K01695+K01620+K00108+K00108+K00276+K00276+K00276+K00276+K00276+K00058+K15893+K00600+K00600+K00600+K00130+K00382+K14085+K14085+K14085+K14085+K01733+K15919+K01834+K15918+K00600+K00058+K01079+K00276+K00600+K01696+K01696+K01696+K00827+K15919+K00600+K00600+K01834+K00276+K00130+K00130+K00003+K00276+K00276+K00600+K12524+K15919+K12524+K00276+K00306+K00306+K01834+K00600+…
Monobactam biosynthesis	ko00261	22	MruG004716;MruG005606;MruG015881;MruG017546;MruG023736;MruG025333;MruG028635;MruG032006;MruG032007;MruG032008;MruG032637;MruG036477;MruG037056;MruG039833;MruG040679;MruG041075;MruG041076;MruG041077;MruG041078;MruG042545;MruG043984;MruG047863;	K01714+K13811+K12524+K12524+K12524+K00133+K00928+K13811+K13811+K13811+K00928+K01714+K00928+K00928+K00215+K01714+K01714+K01714+K01714+K13811+K13811+K13811
Cysteine and methionine metabolism	ko00270	250	Medicago_ruthenica_newGene_1317;Medicago_ruthenica_newGene_2667;Medicago_ruthenica_newGene_2895;Medicago_ruthenica_newGene_361;Medicago_ruthenica_newGene_5939;Medicago_ruthenica_newGene_6095;Medicago_ruthenica_newGene_6220;Medicago_ruthenica_newGene_6404;Medicago_ruthenica_newGene_9507;MruG000163;MruG000769;MruG001158;MruG001268;MruG002058;MruG002153;MruG002423;MruG002617;MruG002661;MruG002742;Mr…	K01738+K00827+K00558+K14455+K00789+K00789+K01738+K20772+K01738+K01251+K00811+K00558+K00797+K00549+K00025+K17398+K17398+K01760+K00789+K00026+K01738+K17398+K00025+K22207+K00025+K01738+K01738+K17398+K17398+K17398+K00837+K01760+K22207+K22207+K23977+K01251+K08967+K08967+K00547+K01738+K00899+K00058+K00558+K22207+K00815+K00558+K05933+K00558+K00815+K00558+K01011+K01011+K00016+K16054+K00815+K17398+K17398+…
Valine, leucine and isoleucine degradation	ko00280	133	Medicago_ruthenica_newGene_2667;Medicago_ruthenica_newGene_9566;MruG000721;MruG001354;MruG002323;MruG003610;MruG004312;MruG004314;MruG004316;MruG005660;MruG006905;MruG006969;MruG007213;MruG008333;MruG008580;MruG008720;MruG008767;MruG008979;MruG009262;MruG009264;MruG009266;MruG009268;MruG011555;MruG012978;MruG013202;MruG013209;MruG013997;MruG014270;MruG014331;MruG015234;MruG015235;MruG015435;MruG0…	K00827+K05605+K05605+K00128+K07513+K01968+K00128+K00128+K00128+K01968+K00020+K00140+K01968+K23146+K00382+K00249+K00128+K00128+K14085+K14085+K14085+K14085+K00128+K01968+K01640+K01640+K05605+K01968+K00827+K00020+K00020+K01968+K00128+K00626+K00128+K00166+K00166+K00166+K00826+K00826+K18660+K18660+K00626+K00167+K07513+K00253+K00128+K01969+K01968+K01968+K01968+K00826+K00826+K00826+K00826+K00826+K00826+…
Valine, leucine and isoleucine biosynthesis	ko00290	31	MruG002804;MruG003704;MruG006581;MruG007170;MruG010989;MruG011244;MruG012040;MruG014107;MruG016931;MruG017407;MruG017418;MruG018855;MruG021232;MruG022077;MruG022078;MruG022743;MruG022968;MruG022969;MruG022971;MruG022975;MruG022977;MruG022980;MruG022981;MruG022983;MruG022984;MruG024023;MruG026351;MruG035324;MruG039498;MruG046971;MruG048467;	K01754+K01703+K01649+K01652+K01687+K00053+K00052+K01703+K01652+K00826+K00826+K01704+K01687+K00053+K00053+K01653+K00826+K00826+K00826+K00826+K00826+K00826+K00826+K00826+K00826+K01653+K00826+K01649+K00053+K01687+K01653
Lysine biosynthesis	ko00300	23	Medicago_ruthenica_newGene_2427;MruG004716;MruG015501;MruG015881;MruG017546;MruG022988;MruG023736;MruG025333;MruG026897;MruG026898;MruG028635;MruG031190;MruG032637;MruG036310;MruG036477;MruG037056;MruG038228;MruG039833;MruG040679;MruG041075;MruG041076;MruG041077;MruG041078;	K10206+K01714+K00003+K12524+K12524+K10206+K12524+K00133+K01586+K01586+K00928+K01778+K00928+K01778+K01714+K00928+K01778+K00928+K00215+K01714+K01714+K01714+K01714
Lysine degradation	ko00310	116	Medicago_ruthenica_newGene_3353;Medicago_ruthenica_newGene_867;Medicago_ruthenica_newGene_8792;MruG000782;MruG000785;MruG001031;MruG001354;MruG001685;MruG001687;MruG002195;MruG003181;MruG003387;MruG004109;MruG004312;MruG004314;MruG004316;MruG004600;MruG005308;MruG006726;MruG008580;MruG008767;MruG008923;MruG008979;MruG009262;MruG009264;MruG009266;MruG009268;MruG009503;MruG009504;MruG010660;MruG010…	K11433+K11433+K00658+K09188+K11422+K11422+K00128+K11420+K11420+K11430+K11426+K11419+K11420+K00128+K00128+K00128+K11430+K11423+K00658+K00382+K00128+K11422+K00128+K14085+K14085+K14085+K14085+K11420+K11420+K14157+K22748+K22748+K00128+K11420+K11433+K11426+K00128+K00626+K00128+K11423+K11422+K00306+K00306+K11420+K14157+K00626+K11420+K11420+K00128+K11433+K11420+K11426+K11426+K00128+K00382+K00382+K11420+…
Arginine and proline metabolism	ko00330	132	Medicago_ruthenica_newGene_2774;Medicago_ruthenica_newGene_3059;Medicago_ruthenica_newGene_361;Medicago_ruthenica_newGene_8380;Medicago_ruthenica_newGene_914;MruG000769;MruG001268;MruG001354;MruG001699;MruG001978;MruG003771;MruG004257;MruG004312;MruG004314;MruG004316;MruG006613;MruG007008;MruG007697;MruG008767;MruG008979;MruG009145;MruG009262;MruG009264;MruG009266;MruG009268;MruG010069;MruG010776…	K12657+K12251+K14455+K12251+K01426+K00811+K00797+K00128+K00286+K01426+K01583+K01426+K00128+K00128+K00128+K00472+K01259+K00472+K00128+K00128+K12259+K14085+K14085+K14085+K14085+K12657+K12251+K12251+K00128+K13366+K14455+K14455+K14455+K14455+K14455+K01426+K01426+K17839+K17839+K12657+K01426+K01426+K00128+K00797+K17839+K00128+K00797+K14454+K00294+K00472+K00472+K01581+K01581+K12657+K01476+K01476+K13427+…
Histidine metabolism	ko00340	60	MruG000421;MruG001354;MruG001545;MruG001816;MruG001826;MruG004312;MruG004314;MruG004316;MruG005173;MruG005353;MruG005355;MruG005356;MruG005357;MruG005706;MruG006692;MruG006794;MruG006810;MruG006812;MruG007301;MruG008343;MruG008344;MruG008767;MruG008979;MruG009262;MruG009264;MruG009266;MruG009268;MruG011555;MruG013756;MruG014676;MruG015440;MruG015544;MruG015548;MruG015650;MruG015772;MruG016228;Mru…	K01590+K00128+K01693+K01663+K01663+K00128+K00128+K00128+K00817+K01590+K01590+K01590+K01590+K01693+K00765+K01590+K01590+K01590+K01814+K14152+K00013+K00128+K00128+K14085+K14085+K14085+K14085+K00128+K01663+K01663+K00128+K11755+K11755+K19787+K01663+K00128+K18649+K00128+K01663+K00128+K01663+K01663+K11755+K00817+K00817+K01663+K01663+K00128+K00128+K11755+K00128+K14152+K00128+K00128+K00765+K00765+K00128+…
Tyrosine metabolism	ko00350	126	Medicago_ruthenica_newGene_2664;Medicago_ruthenica_newGene_361;Medicago_ruthenica_newGene_52;Medicago_ruthenica_newGene_6018;Medicago_ruthenica_newGene_7370;Medicago_ruthenica_newGene_808;Medicago_ruthenica_newGene_9567;MruG000219;MruG000723;MruG000741;MruG000769;MruG001451;MruG001672;MruG002024;MruG005173;MruG005717;MruG005722;MruG005725;MruG005727;MruG005731;MruG006476;MruG007155;MruG007561;Mru…	K15849+K14455+K00451+K15849+K07253+K00121+K00121+K00457+K01593+K00121+K00811+K02510+K00276+K01593+K00817+K00276+K00276+K00276+K00276+K00276+K01593+K00422+K00815+K01555+K01555+K01555+K01555+K01593+K01593+K00815+K00815+K14455+K14455+K14455+K14455+K14455+K00276+K00815+K00276+K00276+K00276+K00121+K00276+K14454+K00815+K18606+K18606+K18606+K07253+K07253+K01593+K01593+K01593+K01593+K01593+K01593+K00121+…
Phenylalanine metabolism	ko00360	134	Medicago_ruthenica_newGene_2664;Medicago_ruthenica_newGene_361;Medicago_ruthenica_newGene_6018;Medicago_ruthenica_newGene_7370;Medicago_ruthenica_newGene_914;MruG000219;MruG000723;MruG000769;MruG001672;MruG001978;MruG002024;MruG002672;MruG004257;MruG005075;MruG005173;MruG005717;MruG005722;MruG005725;MruG005727;MruG005731;MruG006476;MruG007561;MruG008242;MruG008714;MruG008784;MruG008837;MruG011165…	K15849+K14455+K15849+K07253+K01426+K00457+K01593+K00811+K00276+K01426+K01593+K10775+K01426+K10775+K00817+K00276+K00276+K00276+K00276+K00276+K01593+K00815+K01593+K00074+K01593+K00815+K00815+K10775+K10775+K10775+K14455+K14455+K14455+K14455+K14455+K01426+K01426+K00276+K00815+K01426+K01426+K00276+K00276+K00276+K00276+K14454+K00815+K18606+K18606+K18606+K07253+K07253+K01593+K01593+K01593+K01593+K01593+…
Tryptophan metabolism	ko00380	176	Medicago_ruthenica_newGene_1435;Medicago_ruthenica_newGene_1515;Medicago_ruthenica_newGene_3064;Medicago_ruthenica_newGene_4442;Medicago_ruthenica_newGene_6838;Medicago_ruthenica_newGene_7240;Medicago_ruthenica_newGene_7493;Medicago_ruthenica_newGene_7917;Medicago_ruthenica_newGene_832;Medicago_ruthenica_newGene_8792;Medicago_ruthenica_newGene_914;MruG000482;MruG000723;MruG000859;MruG000866;MruG0…	K11816+K11816+K11816+K11816+K11816+K11816+K11816+K11816+K11816+K00658+K01426+K22450+K01593+K11816+K23947+K23947+K11816+K11816+K00128+K01426+K01593+K11816+K11816+K11816+K01426+K00128+K00128+K00128+K00837+K03781+K01593+K00658+K01593+K00382+K00128+K01593+K00128+K14085+K14085+K14085+K14085+K16903+K00128+K01426+K01426+K01426+K01426+K16903+K00128+K00626+K22588+K00128+K11816+K11816+K23947+K11816+K03781+…
Phenylalanine, tyrosine and tryptophan biosynthesis	ko00400	83	Medicago_ruthenica_newGene_2664;Medicago_ruthenica_newGene_361;Medicago_ruthenica_newGene_5057;Medicago_ruthenica_newGene_6018;MruG000712;MruG000716;MruG000769;MruG001571;MruG002735;MruG003567;MruG004027;MruG004727;MruG005100;MruG005106;MruG005173;MruG006392;MruG006909;MruG007561;MruG007640;MruG008837;MruG010706;MruG010884;MruG011165;MruG012416;MruG013300;MruG013314;MruG013316;MruG013323;MruG0133…	K15849+K14455+K05359+K15849+K01850+K01850+K00811+K01658+K01657+K01695+K13832+K13832+K05359+K01736+K00817+K01657+K01626+K00815+K13832+K00815+K05359+K05359+K00815+K13832+K14455+K14455+K14455+K14455+K14455+K01696+K01696+K01696+K00815+K01657+K05359+K01817+K15227+K00766+K01850+K14454+K00815+K05359+K00800+K00800+K05359+K05359+K14455+K13832+K14455+K14455+K00891+K01696+K01735+K01850+K05359+K01626+K01609+…
Benzoxazinoid biosynthesis	ko00402	30	MruG002114;MruG003511;MruG003512;MruG003887;MruG003889;MruG003892;MruG009405;MruG009721;MruG009722;MruG009730;MruG009731;MruG009733;MruG009734;MruG009736;MruG009739;MruG009741;MruG009746;MruG032735;MruG033146;MruG035255;MruG036668;MruG038590;MruG039712;MruG039713;MruG039714;MruG041344;MruG041967;MruG042016;MruG043130;MruG044396;	K13229+K13229+K13229+K13229+K13229+K13229+K13229+K13229+K13229+K13229+K13229+K13229+K13229+K13229+K13229+K13229+K13229+K13229+K13229+K13229+K13229+K13229+K13229+K13229+K13229+K13229+K13229+K13229+K13229+K13229
beta-Alanine metabolism	ko00410	95	Medicago_ruthenica_newGene_9566;MruG000721;MruG001354;MruG001672;MruG004312;MruG004314;MruG004316;MruG005717;MruG005722;MruG005725;MruG005727;MruG005731;MruG006358;MruG006361;MruG006969;MruG007956;MruG008333;MruG008767;MruG008979;MruG009145;MruG009262;MruG009264;MruG009266;MruG009268;MruG011555;MruG012947;MruG013609;MruG013997;MruG014088;MruG014584;MruG014605;MruG015359;MruG015440;MruG015613;MruG…	K05605+K05605+K00128+K00276+K00128+K00128+K00128+K00276+K00276+K00276+K00276+K00276+K01578+K01578+K00140+K01578+K23146+K00128+K00128+K12259+K14085+K14085+K14085+K14085+K00128+K13366+K00276+K05605+K17839+K17839+K01580+K00276+K00128+K00276+K00276+K17839+K00128+K00276+K01580+K00128+K00276+K00232+K17839+K17839+K00140+K01431+K01431+K01580+K00232+K00128+K05605+K00232+K00276+K00276+K00276+K00276+K01580+…
Taurine and hypotaurine metabolism	ko00430	9	MruG014605;MruG016185;MruG019131;MruG023431;MruG029591;MruG029695;MruG033497;MruG034166;MruG045559;	K01580+K18592+K01580+K01580+K01580+K01580+K01580+K18592+K01580
Phosphonate and phosphinate metabolism	ko00440	22	Medicago_ruthenica_newGene_3852;Medicago_ruthenica_newGene_5283;MruG000392;MruG002983;MruG012277;MruG015675;MruG025018;MruG027761;MruG027762;MruG027773;MruG027774;MruG027775;MruG028375;MruG029745;MruG032042;MruG032216;MruG035712;MruG036447;MruG046567;MruG049369;MruG049371;MruG049400;	K00993+K00993+K00968+K00993+K00993+K00968+K00967+K00993+K00993+K00993+K00993+K00993+K00993+K00993+K00993+K00993+K00993+K00967+K00993+K00968+K00968+K00968
Selenocompound metabolism	ko00450	43	MruG000137;MruG002058;MruG002463;MruG002661;MruG004066;MruG004389;MruG005606;MruG006457;MruG006460;MruG006640;MruG006682;MruG008364;MruG008365;MruG008366;MruG011218;MruG015540;MruG015629;MruG015842;MruG021915;MruG027033;MruG028544;MruG031360;MruG031361;MruG031363;MruG031364;MruG031730;MruG032006;MruG032007;MruG032008;MruG034542;MruG037257;MruG041667;MruG042545;MruG043984;MruG044587;MruG047863;Mru…	K00384+K00549+K00384+K01760+K00384+K01760+K13811+K01874+K01874+K08247+K00384+K00384+K00384+K00384+K00384+K00549+K01761+K11717+K01874+K00384+K01760+K00384+K00384+K00384+K00384+K01739+K13811+K13811+K13811+K01739+K00549+K00549+K13811+K13811+K01874+K13811+K01874+K00549+K00384+K00384+K00384+K00384+K00384
Cyanoamino acid metabolism	ko00460	215	Medicago_ruthenica_newGene_1258;Medicago_ruthenica_newGene_3722;Medicago_ruthenica_newGene_641;Medicago_ruthenica_newGene_6961;Medicago_ruthenica_newGene_7453;Medicago_ruthenica_newGene_7878;Medicago_ruthenica_newGene_8055;Medicago_ruthenica_newGene_8252;Medicago_ruthenica_newGene_8255;MruG000215;MruG002354;MruG005023;MruG005687;MruG006225;MruG006723;MruG006823;MruG007534;MruG007535;MruG007589;Mr…	K12153+K12153+K12153+K12153+K05350+K12153+K12153+K01188+K01188+K12153+K01188+K13051+K01455+K05350+K00600+K22706+K00600+K00600+K12153+K05350+K05350+K05349+K05350+K05350+K05350+K05350+K05350+K05350+K12153+K01188+K01188+K01188+K00600+K08248+K01188+K01188+K01188+K01188+K01188+K22706+K22706+K05349+K00600+K05350+K12153+K12153+K12153+K12153+K12153+K12153+K12153+K12153+K12153+K12153+K12153+K12153+K12153+…
Glutathione metabolism	ko00480	172	Medicago_ruthenica_newGene_5682;MruG000023;MruG000736;MruG000982;MruG000986;MruG001268;MruG001385;MruG002584;MruG002585;MruG002588;MruG003140;MruG003399;MruG003408;MruG003560;MruG003674;MruG004718;MruG004719;MruG004720;MruG004806;MruG004807;MruG004808;MruG004809;MruG004815;MruG004913;MruG005093;MruG006431;MruG006450;MruG006502;MruG006569;MruG006572;MruG006930;MruG009196;MruG009342;MruG009525;MruG…	K00799+K00799+K00432+K22596+K22596+K00797+K22596+K00799+K00799+K00799+K00434+K00434+K00434+K00383+K00432+K00799+K00799+K00799+K00799+K00799+K00799+K00799+K00799+K00434+K00799+K00799+K00434+K21888+K00799+K00434+K00434+K00799+K10808+K00031+K00799+K00799+K00799+K00799+K00799+K00799+K00799+K00799+K00799+K01255+K00799+K00799+K00799+K21456+K00799+K00799+K00799+K21888+K00434+K00797+K00434+K18592+K00434+…
Starch and sucrose metabolism	ko00500	585	Medicago_ruthenica_newGene_117;Medicago_ruthenica_newGene_1220;Medicago_ruthenica_newGene_1222;Medicago_ruthenica_newGene_1224;Medicago_ruthenica_newGene_1460;Medicago_ruthenica_newGene_1538;Medicago_ruthenica_newGene_1544;Medicago_ruthenica_newGene_1560;Medicago_ruthenica_newGene_1620;Medicago_ruthenica_newGene_1645;Medicago_ruthenica_newGene_1646;Medicago_ruthenica_newGene_1647;Medicago_rutheni…	K00695+K01179+K01179+K01179+K01179+K00695+K00695+K00695+K00695+K00695+K00695+K00695+K00695+K00695+K01179+K00695+K00695+K00695+K00695+K01179+K01179+K01087+K00695+K00695+K00695+K00695+K00847+K00695+K00695+K00695+K00695+K00695+K00695+K00695+K00695+K00695+K00695+K01193+K00695+K00695+K00695+K00695+K00695+K00695+K00695+K05350+K00695+K00695+K19891+K01179+K00695+K00695+K00695+K00695+K01188+K01188+K00695+…
N-Glycan biosynthesis	ko00510	80	Medicago_ruthenica_newGene_5519;Medicago_ruthenica_newGene_9;Medicago_ruthenica_newGene_989;MruG000179;MruG002264;MruG002532;MruG002627;MruG003441;MruG005084;MruG005750;MruG006274;MruG006369;MruG006371;MruG007246;MruG007619;MruG010188;MruG011404;MruG011506;MruG011507;MruG011999;MruG012079;MruG012652;MruG014025;MruG016545;MruG017109;MruG017136;MruG017164;MruG018266;MruG018339;MruG018539;MruG018540…	K01230+K01230+K01230+K09659+K00736+K01228+K07252+K12667+K12666+K03843+K03844+K03842+K07151+K09658+K23741+K03846+K00902+K00729+K00721+K07441+K03844+K12668+K03843+K07441+K05546+K07432+K00737+K07432+K12666+K00726+K00726+K03844+K01230+K00729+K00729+K00729+K12670+K12670+K12345+K00721+K03849+K01228+K01228+K00737+K00779+K05546+K05546+K12668+K07441+K07441+K01231+K03848+K00729+K07151+K03844+K03844+K00729+…
Other glycan degradation	ko00511	138	Medicago_ruthenica_newGene_5054;MruG000171;MruG000474;MruG000600;MruG000942;MruG000996;MruG001369;MruG001373;MruG001378;MruG001379;MruG001529;MruG001679;MruG001680;MruG002041;MruG002299;MruG002300;MruG002642;MruG003591;MruG003678;MruG004230;MruG004232;MruG004289;MruG005036;MruG005585;MruG005593;MruG005934;MruG005935;MruG006264;MruG006495;MruG006499;MruG006911;MruG007341;MruG007342;MruG007344;MruG…	K01206+K12309+K12309+K12309+K01191+K01191+K01206+K01206+K01206+K01206+K12373+K12309+K12309+K12309+K01227+K01227+K12309+K12309+K17108+K01206+K01206+K12309+K12309+K01206+K01206+K15923+K15923+K12309+K12373+K12373+K01227+K01206+K01206+K01206+K01206+K01206+K12309+K12309+K12309+K12373+K01191+K01206+K01206+K01206+K01206+K12309+K12309+K12309+K12309+K01206+K12309+K12309+K12309+K12309+K12309+K01444+K01206+…
Various types of N-glycan biosynthesis	ko00513	62	Medicago_ruthenica_newGene_5519;Medicago_ruthenica_newGene_9;Medicago_ruthenica_newGene_989;MruG001529;MruG002264;MruG003441;MruG005084;MruG005167;MruG005210;MruG005750;MruG006274;MruG006369;MruG006371;MruG006495;MruG006499;MruG007619;MruG009511;MruG010188;MruG010648;MruG010693;MruG011999;MruG012079;MruG012652;MruG013624;MruG013629;MruG014025;MruG016123;MruG016545;MruG017136;MruG018266;MruG018339…	K01230+K01230+K01230+K12373+K00736+K12667+K12666+K14412+K14412+K03843+K03844+K03842+K07151+K12373+K12373+K23741+K12373+K03846+K14412+K14412+K07441+K03844+K12668+K03714+K03714+K03843+K14412+K07441+K07432+K07432+K12666+K00726+K00726+K03844+K01230+K12670+K12670+K00753+K14412+K14412+K12668+K07441+K14413+K07441+K01231+K07151+K03844+K03844+K12373+K03845+K03847+K07441+K07441+K03844+K07441+K07441+K01230+…
Other types of O-glycan biosynthesis	ko00514	43	MruG000251;MruG000781;MruG002954;MruG004067;MruG006016;MruG006626;MruG006724;MruG014108;MruG014180;MruG014181;MruG014918;MruG018214;MruG018651;MruG019543;MruG020456;MruG020520;MruG021267;MruG021273;MruG021274;MruG021275;MruG024668;MruG027117;MruG028188;MruG028190;MruG030495;MruG032272;MruG032276;MruG032277;MruG032280;MruG034667;MruG037060;MruG037632;MruG039560;MruG040435;MruG040903;MruG041217;Mru…	K20783+K20782+K09667+K09667+K20784+K09667+K03691+K20784+K20782+K20782+K20784+K20784+K20784+K20784+K20784+K20784+K20783+K20783+K20783+K20783+K00779+K20784+K18134+K18134+K20782+K20781+K20781+K20781+K20781+K20784+K00779+K18134+K20784+K03691+K20784+K20782+K20784+K20783+K20784+K20784+K20784+K20784+K20784
Mannose type O-glycan biosynthesis	ko00515	3	MruG025388;MruG025389;MruG025390;	K18207+K18207+K18207
Amino sugar and nucleotide sugar metabolism	ko00520	346	Medicago_ruthenica_newGene_1150;Medicago_ruthenica_newGene_2126;Medicago_ruthenica_newGene_214;Medicago_ruthenica_newGene_218;Medicago_ruthenica_newGene_2653;Medicago_ruthenica_newGene_3070;Medicago_ruthenica_newGene_3095;Medicago_ruthenica_newGene_339;Medicago_ruthenica_newGene_3855;Medicago_ruthenica_newGene_3878;Medicago_ruthenica_newGene_4044;Medicago_ruthenica_newGene_4166;Medicago_ruthenica…	K12447+K01209+K01183+K01183+K01183+K12447+K12447+K01183+K12447+K00966+K12447+K12447+K01209+K01209+K00847+K01183+K13648+K12447+K12447+K13648+K00820+K12447+K00965+K12447+K12447+K12447+K12447+K12447+K01183+K12447+K00966+K01209+K01209+K01183+K01209+K00965+K12447+K00844+K01183+K00820+K12450+K12446+K01183+K01209+K12373+K01183+K08678+K08678+K12447+K00844+K00847+K00847+K00847+K00847+K00847+K13648+K00847+…
Polyketide sugar unit biosynthesis	ko00523	1	MruG043313;	K12451
Glycosaminoglycan degradation	ko00531	90	Medicago_ruthenica_newGene_1308;Medicago_ruthenica_newGene_1365;Medicago_ruthenica_newGene_1411;Medicago_ruthenica_newGene_1413;Medicago_ruthenica_newGene_1415;Medicago_ruthenica_newGene_1416;Medicago_ruthenica_newGene_7129;MruG000171;MruG000474;MruG000600;MruG001529;MruG001679;MruG001680;MruG002041;MruG002642;MruG002753;MruG002754;MruG003591;MruG004289;MruG004653;MruG005036;MruG006264;MruG006495…	K07964+K07964+K07964+K07964+K07964+K07964+K07964+K12309+K12309+K12309+K12373+K12309+K12309+K12309+K12309+K10532+K10532+K12309+K12309+K10532+K12309+K12309+K12373+K12373+K10532+K12309+K12309+K12309+K07964+K12373+K12309+K12309+K12309+K12309+K12309+K12309+K12309+K12309+K12309+K07964+K07964+K01205+K12309+K12309+K12309+K12309+K12309+K12309+K07964+K07964+K07964+K12309+K10532+K12309+K12309+K12309+K12309+…
Glycerolipid metabolism	ko00561	223	Medicago_ruthenica_newGene_1614;Medicago_ruthenica_newGene_239;Medicago_ruthenica_newGene_3506;Medicago_ruthenica_newGene_6162;Medicago_ruthenica_newGene_9519;Medicago_ruthenica_newGene_9738;MruG000062;MruG000065;MruG000066;MruG000262;MruG000267;MruG000361;MruG000698;MruG001354;MruG001586;MruG002053;MruG002571;MruG003057;MruG003338;MruG003821;MruG003828;MruG003963;MruG003965;MruG004034;MruG004075…	K00679+K00679+K00655+K00679+K13523+K13523+K00679+K00679+K00679+K13513+K13513+K15728+K03715+K00128+K00901+K00655+K15728+K09480+K00679+K00655+K00655+K07407+K07407+K07407+K00679+K00128+K00128+K00128+K13508+K14674+K01054+K01054+K18693+K18693+K18693+K18693+K01054+K00655+K16816+K18693+K07407+K00655+K00679+K00679+K00679+K00679+K00679+K00679+K00679+K00679+K00679+K00679+K00679+K00679+K00679+K00128+K00128+…
Inositol phosphate metabolism	ko00562	169	MruG000097;MruG000188;MruG000275;MruG000279;MruG000475;MruG000481;MruG001004;MruG001886;MruG002770;MruG002824;MruG003612;MruG003746;MruG003929;MruG004015;MruG004016;MruG004939;MruG004940;MruG004942;MruG004943;MruG005217;MruG005220;MruG005232;MruG005272;MruG005663;MruG005843;MruG005974;MruG006969;MruG007720;MruG008021;MruG008022;MruG008787;MruG009257;MruG011495;MruG011823;MruG012010;MruG012498;Mru…	K18081+K10572+K01099+K01765+K05857+K01765+K01803+K01099+K00889+K18081+K24221+K18081+K18081+K18081+K01099+K18081+K18081+K18081+K18081+K18081+K18081+K00921+K20279+K24221+K00913+K01110+K00140+K10047+K10047+K10047+K18081+K05857+K01803+K00889+K00889+K00889+K00889+K05857+K01114+K00889+K01114+K19801+K01765+K05857+K05857+K03103+K03103+K00469+K00469+K00889+K01858+K01858+K18081+K01114+K00889+K18081+K19801+…
Glycosylphosphatidylinositol (GPI)-anchor biosynthesis	ko00563	64	Medicago_ruthenica_newGene_4503;Medicago_ruthenica_newGene_6762;Medicago_ruthenica_newGene_6771;Medicago_ruthenica_newGene_9533;MruG000103;MruG000104;MruG000105;MruG000441;MruG004499;MruG005081;MruG005924;MruG006335;MruG007246;MruG007822;MruG010668;MruG010673;MruG010675;MruG011389;MruG015428;MruG016758;MruG017326;MruG017924;MruG017925;MruG017927;MruG022348;MruG023268;MruG024540;MruG027554;MruG027…	K05291+K05291+K03860+K03860+K03860+K03860+K03860+K03860+K05290+K03857+K03860+K07541+K09658+K03861+K03861+K03861+K03861+K03857+K03859+K03859+K03860+K05287+K05287+K05287+K07542+K03434+K05289+K05310+K03860+K03860+K03860+K03860+K03860+K03858+K03860+K05294+K05285+K05288+K03860+K03860+K05288+K11001+K05292+K05292+K05292+K05292+K05284+K03858+K09658+K05283+K03860+K05293+K03860+K05288+K05286+K03860+K03860+…
Glycerophospholipid metabolism	ko00564	211	Medicago_ruthenica_newGene_3506;Medicago_ruthenica_newGene_3852;Medicago_ruthenica_newGene_5283;Medicago_ruthenica_newGene_6077;Medicago_ruthenica_newGene_7347;Medicago_ruthenica_newGene_8799;Medicago_ruthenica_newGene_9349;Medicago_ruthenica_newGene_9519;Medicago_ruthenica_newGene_9738;MruG000253;MruG000262;MruG000267;MruG000361;MruG000391;MruG000392;MruG000671;MruG001586;MruG002053;MruG002571;M…	K00655+K00993+K00993+K00981+K00981+K00981+K00981+K13523+K13523+K13510+K13513+K13513+K15728+K16818+K00968+K00981+K00901+K00655+K15728+K00993+K05929+K00655+K00655+K01115+K13508+K14674+K00111+K14156+K18693+K00981+K00981+K00981+K08730+K18693+K18693+K18693+K00995+K00655+K01613+K18693+K00655+K16818+K14156+K14156+K16818+K08744+K08744+K00981+K01115+K00655+K00006+K00981+K00901+K01613+K13523+K01115+K18696+…
Ether lipid metabolism	ko00565	62	Medicago_ruthenica_newGene_3852;Medicago_ruthenica_newGene_5283;MruG000253;MruG002983;MruG004334;MruG004631;MruG008702;MruG011732;MruG011996;MruG012277;MruG013162;MruG013168;MruG013169;MruG014127;MruG016176;MruG016177;MruG016178;MruG016942;MruG017567;MruG017651;MruG017652;MruG018248;MruG018454;MruG018829;MruG019354;MruG024029;MruG025028;MruG025035;MruG026072;MruG026073;MruG026792;MruG026793;MruG0…	K00993+K00993+K13510+K00993+K01115+K14674+K01115+K01115+K01115+K00993+K01114+K14674+K14674+K01114+K06123+K06123+K06123+K01114+K16860+K01115+K01115+K01115+K01062+K01115+K01115+K01115+K01047+K01047+K01115+K01115+K01062+K01062+K01062+K01115+K00993+K00993+K00993+K00993+K00993+K00993+K00993+K00993+K00993+K14674+K01047+K01047+K01047+K00993+K01115+K14674+K13510+K01062+K01062+K01115+K01114+K01115+K13510+…
Arachidonic acid metabolism	ko00590	59	Medicago_ruthenica_newGene_6053;Medicago_ruthenica_newGene_701;MruG000736;MruG003674;MruG004325;MruG004631;MruG004708;MruG005468;MruG005469;MruG005506;MruG006566;MruG009561;MruG011098;MruG011099;MruG013168;MruG013169;MruG015498;MruG016185;MruG017015;MruG018205;MruG022575;MruG024634;MruG024764;MruG024765;MruG025028;MruG025035;MruG025323;MruG025999;MruG027076;MruG033030;MruG033390;MruG033391;MruG03…	K15730+K00079+K00432+K00432+K08726+K14674+K15730+K07425+K07425+K07425+K01254+K08726+K08726+K08726+K14674+K14674+K07425+K18592+K00079+K05309+K00079+K00079+K00432+K00432+K01047+K01047+K00432+K00432+K08726+K07425+K05309+K05309+K14674+K18592+K01047+K01047+K01047+K05309+K14674+K00432+K08726+K08726+K08726+K08726+K08726+K08726+K08726+K08726+K08726+K08726+K08726+K08726+K08726+K08726+K08726+K05309+K05309+…
Linoleic acid metabolism	ko00591	53	MruG003180;MruG004184;MruG004191;MruG004274;MruG004277;MruG004278;MruG004631;MruG005384;MruG005734;MruG006684;MruG011677;MruG011678;MruG013168;MruG013169;MruG015505;MruG015506;MruG015507;MruG015511;MruG015512;MruG015647;MruG017667;MruG019913;MruG021112;MruG022780;MruG023622;MruG024874;MruG025028;MruG025035;MruG026973;MruG026974;MruG033656;MruG034189;MruG034190;MruG034225;MruG034314;MruG037575;Mru…	K15718+K15718+K15718+K15718+K15718+K15718+K14674+K15718+K15718+K15718+K15718+K15718+K14674+K14674+K00454+K00454+K00454+K00454+K00454+K15718+K15718+K00454+K00454+K00454+K00454+K00454+K01047+K01047+K15718+K15718+K14674+K01047+K01047+K01047+K15718+K14674+K15718+K00454+K15718+K15718+K15718+K15718+K15718+K15718+K15718+K15718+K15718+K15718+K00454+K15718+K15718+K00454+K14674
alpha-Linolenic acid metabolism	ko00592	115	MruG000011;MruG000013;MruG000189;MruG000190;MruG000289;MruG000391;MruG001641;MruG002323;MruG003162;MruG004631;MruG004878;MruG006013;MruG007347;MruG007660;MruG008737;MruG008739;MruG008740;MruG008745;MruG010868;MruG013168;MruG013169;MruG014098;MruG015505;MruG015506;MruG015507;MruG015511;MruG015512;MruG018015;MruG018056;MruG018312;MruG018931;MruG019458;MruG019799;MruG019815;MruG019816;MruG019819;Mru…	K05894+K10526+K08241+K08241+K01723+K16818+K01723+K07513+K01723+K14674+K10526+K08241+K16818+K16818+K10527+K10527+K10527+K10527+K10528+K14674+K14674+K16818+K00454+K00454+K00454+K00454+K00454+K01723+K10526+K05894+K05894+K07513+K00224+K00224+K00224+K00224+K00224+K00454+K00454+K01723+K10525+K16818+K00232+K16818+K22389+K16818+K16818+K00454+K00454+K00232+K00454+K01047+K01047+K10529+K05894+K05894+K05894+…
Sphingolipid metabolism	ko00600	111	Medicago_ruthenica_newGene_531;Medicago_ruthenica_newGene_532;Medicago_ruthenica_newGene_6163;MruG000171;MruG000407;MruG000408;MruG000474;MruG000600;MruG001679;MruG001680;MruG002041;MruG002642;MruG003199;MruG003591;MruG003678;MruG003963;MruG003965;MruG004034;MruG004289;MruG005036;MruG005248;MruG006264;MruG007009;MruG007096;MruG007157;MruG007810;MruG007990;MruG009277;MruG009281;MruG009282;MruG0111…	K12349+K12349+K12349+K12309+K00654+K00654+K12309+K12309+K12309+K12309+K12309+K12309+K12349+K12309+K17108+K07407+K07407+K07407+K12309+K12309+K04713+K12309+K07407+K04718+K04712+K04708+K04711+K12309+K12309+K12309+K12309+K12309+K12309+K12309+K07407+K12309+K12309+K12309+K12309+K12309+K04715+K12349+K12309+K17108+K17108+K12349+K07407+K12309+K07407+K12309+K12309+K12309+K12309+K12309+K12309+K12309+K17108+…
Glycosphingolipid biosynthesis - lacto and neolacto series	ko00601	3	MruG007182;MruG022347;MruG036081;	K01988+K01988+K01988
Glycosphingolipid biosynthesis - globo and isoglobo series	ko00603	26	MruG001529;MruG003963;MruG003965;MruG004034;MruG006495;MruG006499;MruG007009;MruG007182;MruG009511;MruG011463;MruG016058;MruG016700;MruG022347;MruG024119;MruG024121;MruG024122;MruG024125;MruG024548;MruG031222;MruG033362;MruG033386;MruG033960;MruG034991;MruG036081;MruG036404;MruG036405;	K12373+K07407+K07407+K07407+K12373+K12373+K07407+K01988+K12373+K07407+K07407+K07407+K01988+K07407+K07407+K07407+K07407+K07407+K07407+K07407+K07407+K07407+K12373+K01988+K07407+K07407
Glycosphingolipid biosynthesis - ganglio series	ko00604	62	MruG000171;MruG000474;MruG000600;MruG001529;MruG001679;MruG001680;MruG002041;MruG002642;MruG003591;MruG004289;MruG005036;MruG006264;MruG006495;MruG006499;MruG009277;MruG009281;MruG009282;MruG009511;MruG011194;MruG011318;MruG011322;MruG011323;MruG011709;MruG011711;MruG011721;MruG012135;MruG012139;MruG013966;MruG016249;MruG017105;MruG017106;MruG018034;MruG018102;MruG018491;MruG018859;MruG018860;Mru…	K12309+K12309+K12309+K12373+K12309+K12309+K12309+K12309+K12309+K12309+K12309+K12309+K12373+K12373+K12309+K12309+K12309+K12373+K12309+K12309+K12309+K12309+K12309+K12309+K12309+K12309+K12309+K12309+K12309+K12309+K12309+K12309+K12309+K12309+K12309+K12309+K12309+K12309+K12309+K12309+K12309+K12309+K12309+K12309+K12309+K12309+K12309+K12309+K12309+K12373+K12309+K12309+K12309+K12309+K12309+K12309+K12309+…
Pyruvate metabolism	ko00620	183	Medicago_ruthenica_newGene_2848;Medicago_ruthenica_newGene_2849;Medicago_ruthenica_newGene_42;Medicago_ruthenica_newGene_5315;Medicago_ruthenica_newGene_6194;MruG001354;MruG001815;MruG001825;MruG002153;MruG002710;MruG002816;MruG002977;MruG003705;MruG003881;MruG003921;MruG004101;MruG004112;MruG004312;MruG004314;MruG004316;MruG004668;MruG004877;MruG004934;MruG004935;MruG005024;MruG005169;MruG005170…	K00029+K00029+K00029+K00162+K00102+K00128+K00162+K00162+K00025+K01512+K00873+K00026+K01759+K00025+K00873+K00025+K01759+K00128+K00128+K00128+K01679+K00051+K00627+K00873+K01595+K00627+K00627+K00873+K00161+K00873+K00627+K01649+K01759+K00382+K00128+K00128+K14085+K14085+K14085+K14085+K00016+K18881+K01595+K01595+K00128+K01069+K01595+K00161+K00161+K01610+K00026+K00161+K00026+K01759+K18881+K18881+K18881+…
Glyoxylate and dicarboxylate metabolism	ko00630	188	Medicago_ruthenica_newGene_9458;MruG000571;MruG000747;MruG001870;MruG002153;MruG002774;MruG002777;MruG002782;MruG002808;MruG002977;MruG003248;MruG003833;MruG003834;MruG003881;MruG004101;MruG004290;MruG005542;MruG005687;MruG006301;MruG006723;MruG007534;MruG007535;MruG007736;MruG007738;MruG007739;MruG007742;MruG008095;MruG008580;MruG008931;MruG008935;MruG009456;MruG009852;MruG009859;MruG009860;MruG…	K01915+K00281+K22133+K01647+K00025+K01915+K01915+K01915+K01637+K00026+K22133+K01681+K01681+K00025+K00025+K11517+K03781+K01455+K15893+K00600+K00600+K00600+K01915+K01915+K01915+K01915+K19269+K00382+K01647+K01647+K01647+K11517+K11517+K11517+K01681+K18121+K15919+K15918+K00600+K01601+K01601+K00026+K22133+K01647+K00600+K00026+K01915+K01915+K15919+K00600+K00600+K01681+K01681+K01681+K00626+K00600+K15919+…
Propanoate metabolism	ko00640	66	Medicago_ruthenica_newGene_9566;MruG000721;MruG003415;MruG006358;MruG006361;MruG006969;MruG007956;MruG008333;MruG008580;MruG009929;MruG013997;MruG015166;MruG015748;MruG016344;MruG016345;MruG017152;MruG019142;MruG019388;MruG022042;MruG023030;MruG023796;MruG023823;MruG024255;MruG025010;MruG025205;MruG025366;MruG025367;MruG026151;MruG026189;MruG028625;MruG028658;MruG031172;MruG031864;MruG033598;MruG…	K05605+K05605+K01900+K01578+K01578+K00140+K01578+K23146+K00382+K00016+K05605+K11262+K00626+K00166+K00166+K00166+K00626+K00167+K00232+K00140+K01895+K01895+K00232+K01961+K05605+K00382+K00382+K00016+K00232+K00382+K00382+K00626+K02160+K01899+K00382+K02160+K00382+K01962+K00232+K00016+K02160+K01895+K05605+K23146+K05605+K05605+K01963+K00232+K00016+K09699+K00382+K01692+K00382+K00626+K00232+K00232+K00232+…
Butanoate metabolism	ko00650	41	MruG007170;MruG008714;MruG011706;MruG013202;MruG013209;MruG014605;MruG015748;MruG016931;MruG019131;MruG019142;MruG021835;MruG021840;MruG022743;MruG023431;MruG024023;MruG025845;MruG025846;MruG026068;MruG026069;MruG029591;MruG029695;MruG030367;MruG030446;MruG030454;MruG030528;MruG031172;MruG032432;MruG032441;MruG033497;MruG034260;MruG037494;MruG037503;MruG040675;MruG044537;MruG044575;MruG045447;Mru…	K01652+K00074+K18121+K01640+K01640+K01580+K00626+K01652+K01580+K00626+K16871+K16871+K01653+K01580+K01653+K01913+K01913+K01641+K01641+K01580+K01580+K00109+K01640+K01640+K01640+K00626+K00109+K00109+K01580+K00109+K01640+K01640+K18121+K01913+K01692+K00626+K01580+K00109+K00626+K00626+K01653
C5-Branched dibasic acid metabolism	ko00660	9	MruG003704;MruG007170;MruG012040;MruG014107;MruG016931;MruG018855;MruG022743;MruG024023;MruG048467;	K01703+K01652+K00052+K01703+K01652+K01704+K01653+K01653+K01653
One carbon pool by folate	ko00670	45	MruG001109;MruG001387;MruG001947;MruG006559;MruG006708;MruG006723;MruG007534;MruG007535;MruG012060;MruG012200;MruG012449;MruG013155;MruG013269;MruG013805;MruG015135;MruG015136;MruG015860;MruG018005;MruG018418;MruG018715;MruG021388;MruG021389;MruG023426;MruG023748;MruG026181;MruG027465;MruG027963;MruG029081;MruG031008;MruG031922;MruG031932;MruG034759;MruG036588;MruG038609;MruG038829;MruG042588;Mru…	K00601+K00288+K00297+K01938+K00604+K00600+K00600+K00600+K00600+K00288+K00602+K01934+K00601+K00600+K00600+K00600+K00600+K00600+K13998+K00288+K13998+K13998+K00600+K00600+K01433+K00600+K00600+K00600+K00602+K00600+K00600+K01433+K00288+K00288+K00288+K00600+K00605+K00297+K00600+K00601+K00602+K00600+K00288+K00600+K00600
Carbon fixation in photosynthetic organisms	ko00710	146	Medicago_ruthenica_newGene_2848;Medicago_ruthenica_newGene_2849;Medicago_ruthenica_newGene_361;Medicago_ruthenica_newGene_3736;Medicago_ruthenica_newGene_3737;Medicago_ruthenica_newGene_42;Medicago_ruthenica_newGene_7069;MruG001004;MruG002153;MruG002849;MruG002977;MruG003881;MruG004101;MruG004877;MruG005024;MruG005149;MruG005994;MruG006050;MruG006557;MruG006805;MruG008449;MruG009613;MruG009614;Mr…	K00029+K00029+K14455+K01623+K01623+K00029+K00134+K01803+K00025+K01623+K00026+K00025+K00025+K00051+K01595+K01807+K01807+K01623+K00615+K03841+K01807+K00134+K00134+K00134+K00927+K00927+K01595+K01595+K01803+K01595+K01601+K01601+K01610+K00026+K01783+K14455+K14455+K14455+K14455+K14455+K01783+K00026+K01610+K01100+K01595+K01595+K01595+K00134+K00134+K00134+K00134+K00927+K14454+K00029+K00029+K01610+K05298+…
Thiamine metabolism	ko00730	47	Medicago_ruthenica_newGene_7270;Medicago_ruthenica_newGene_9013;MruG002280;MruG002281;MruG002308;MruG002593;MruG003378;MruG004116;MruG004119;MruG005172;MruG005786;MruG006716;MruG006718;MruG006719;MruG007685;MruG010267;MruG013236;MruG013238;MruG014341;MruG014885;MruG015965;MruG017682;MruG017866;MruG017885;MruG019845;MruG019934;MruG020541;MruG022162;MruG026342;MruG026984;MruG029087;MruG029967;MruG0…	K01662+K01662+K00878+K00878+K00878+K00939+K22911+K22911+K22911+K22911+K03146+K14153+K14153+K14153+K01662+K20896+K03147+K03147+K00939+K20896+K06949+K01662+K22911+K22911+K00939+K22911+K14394+K03146+K04487+K06928+K00878+K20896+K00939+K22911+K00939+K00939+K22911+K00939+K00949+K01662+K01662+K22911+K00939+K20896+K00939+K00939+K06949
Riboflavin metabolism	ko00740	39	MruG002492;MruG002607;MruG002608;MruG006396;MruG006934;MruG007713;MruG010137;MruG011247;MruG011449;MruG015018;MruG015290;MruG020133;MruG020541;MruG022861;MruG023090;MruG023348;MruG023478;MruG023480;MruG023481;MruG023488;MruG024176;MruG024775;MruG025036;MruG025471;MruG031484;MruG033457;MruG034223;MruG034984;MruG036760;MruG036786;MruG037554;MruG037787;MruG037814;MruG038369;MruG039093;MruG040624;Mru…	K14379+K00793+K00793+K22949+K14652+K20884+K14379+K20884+K14652+K22912+K20884+K00793+K14394+K20884+K14652+K00794+K14379+K14379+K14379+K14379+K20884+K22912+K01513+K14379+K01513+K14379+K01513+K01513+K20860+K11752+K01513+K18453+K00861+K00953+K20884+K01513+K11752+K14379+K11752
Vitamin B6 metabolism	ko00750	31	Medicago_ruthenica_newGene_5587;Medicago_ruthenica_newGene_9026;MruG007487;MruG009475;MruG011670;MruG011748;MruG011750;MruG016540;MruG016831;MruG018116;MruG018970;MruG019111;MruG025043;MruG025046;MruG029809;MruG031975;MruG038304;MruG038305;MruG040104;MruG040107;MruG040109;MruG040110;MruG040112;MruG040573;MruG042437;MruG042613;MruG044825;MruG046845;MruG049933;MruG049934;MruG049957;	K23998+K23998+K06215+K13248+K01733+K13248+K13248+K05275+K23998+K06215+K06215+K08681+K13248+K13248+K00868+K23998+K01733+K01733+K13248+K13248+K13248+K13248+K13248+K00275+K00831+K06215+K01733+K00275+K06215+K06215+K06215
Nicotinate and nicotinamide metabolism	ko00760	48	MruG000227;MruG001336;MruG001397;MruG001927;MruG001929;MruG004494;MruG005038;MruG005713;MruG007694;MruG010046;MruG011688;MruG013447;MruG016059;MruG016282;MruG017126;MruG018052;MruG020062;MruG021884;MruG021885;MruG024138;MruG024981;MruG025036;MruG025634;MruG025635;MruG026492;MruG029969;MruG029972;MruG031016;MruG031413;MruG031484;MruG034223;MruG034254;MruG034897;MruG034984;MruG035252;MruG037554;Mru…	K01081+K00858+K00767+K01240+K01240+K18551+K06210+K03787+K01240+K00858+K03787+K11416+K03517+K00858+K11414+K01081+K00858+K00858+K00858+K03517+K01950+K01513+K03787+K03787+K00763+K01081+K01081+K06210+K00278+K01513+K01513+K03426+K06210+K01513+K00763+K01513+K01240+K01513+K00763+K03517+K03426+K03426+K01240+K01081+K01081+K06210+K18551+K03517
Pantothenate and CoA biosynthesis	ko00770	88	Medicago_ruthenica_newGene_5462;MruG001354;MruG002443;MruG002771;MruG002933;MruG003937;MruG003938;MruG003939;MruG004312;MruG004314;MruG004316;MruG007170;MruG008767;MruG008812;MruG008979;MruG010989;MruG011244;MruG011555;MruG011612;MruG014088;MruG014584;MruG015139;MruG015416;MruG015440;MruG015702;MruG016228;MruG016931;MruG016950;MruG017407;MruG017418;MruG019660;MruG021072;MruG021232;MruG022077;MruG…	K01598+K00128+K06133+K09680+K06133+K09680+K09680+K09680+K00128+K00128+K00128+K01652+K00128+K00606+K00128+K01687+K00053+K00128+K06133+K17839+K17839+K01922+K09680+K00128+K17839+K00128+K01652+K01922+K00826+K00826+K09680+K00128+K01687+K00053+K00053+K17839+K17839+K01653+K00826+K00826+K00826+K00826+K00826+K00826+K00826+K00826+K00826+K01431+K01431+K01653+K00128+K01513+K00826+K02201+K01464+K01464+K01464+…
Biotin metabolism	ko00780	30	MruG002488;MruG003359;MruG004258;MruG005636;MruG005637;MruG006679;MruG006870;MruG009305;MruG012210;MruG015095;MruG015983;MruG019215;MruG020180;MruG021747;MruG021874;MruG023302;MruG024969;MruG037869;MruG037871;MruG037872;MruG039197;MruG041369;MruG044769;MruG044770;MruG045036;MruG045235;MruG045506;MruG047134;MruG047968;MruG049336;	K00059+K09458+K00059+K09458+K09458+K02372+K02372+K09458+K00652+K01942+K00059+K00059+K09458+K00208+K01012+K09458+K09458+K00059+K00059+K00059+K00059+K09458+K09458+K09458+K19562+K00059+K00059+K00059+K00059+K00652
Lipoic acid metabolism	ko00785	5	MruG002445;MruG005883;MruG011072;MruG016032;MruG018018;	K03644+K23735+K03644+K03644+K03801
Folate biosynthesis	ko00790	48	Medicago_ruthenica_newGene_701;MruG001182;MruG001284;MruG002409;MruG005107;MruG005552;MruG006397;MruG006934;MruG008897;MruG008899;MruG008900;MruG009458;MruG010127;MruG010128;MruG010129;MruG010130;MruG010131;MruG010272;MruG010913;MruG011449;MruG012934;MruG012938;MruG013201;MruG014805;MruG017015;MruG018418;MruG019729;MruG021388;MruG021389;MruG022575;MruG023090;MruG024634;MruG024845;MruG026688;MruG0…	K00079+K18482+K20457+K01724+K13950+K15631+K03637+K14652+K15631+K15631+K15631+K03639+K01307+K01307+K01307+K01307+K01307+K18482+K01633+K14652+K15376+K15376+K03635+K01930+K00079+K13998+K15631+K13998+K13998+K00079+K14652+K00079+K01307+K01724+K13941+K01113+K15376+K01495+K01633+K01633+K01633+K01495+K01495+K01495+K15631+K15631+K15631+K15376
Porphyrin and chlorophyll metabolism	ko00860	78	Medicago_ruthenica_newGene_5263;MruG000342;MruG001366;MruG001370;MruG002030;MruG002031;MruG002032;MruG002267;MruG004468;MruG004506;MruG006683;MruG007327;MruG007665;MruG010094;MruG010167;MruG010179;MruG010369;MruG012126;MruG012801;MruG012802;MruG014034;MruG015017;MruG016243;MruG016333;MruG016671;MruG016797;MruG017075;MruG017202;MruG017203;MruG017439;MruG017556;MruG017994;MruG018545;MruG019292;MruG…	K01599+K21480+K13600+K13600+K08099+K08099+K08099+K18010+K01885+K00231+K04035+K03405+K19073+K13606+K01599+K01599+K00218+K13544+K02303+K02303+K13606+K01599+K01698+K22013+K13544+K02259+K01772+K01719+K01719+K01772+K13071+K02492+K01845+K01772+K13071+K13071+K01749+K03405+K02492+K13071+K13071+K01772+K03428+K01885+K03404+K22013+K01599+K02492+K13544+K10960+K10960+K13545+K08101+K00228+K03794+K01885+K08099+…
Terpenoid backbone biosynthesis	ko00900	132	Medicago_ruthenica_newGene_5941;Medicago_ruthenica_newGene_658;Medicago_ruthenica_newGene_7270;Medicago_ruthenica_newGene_9013;MruG002196;MruG002894;MruG003487;MruG003611;MruG005114;MruG005316;MruG006267;MruG006678;MruG007685;MruG008091;MruG008098;MruG009058;MruG009602;MruG009975;MruG009979;MruG009984;MruG010907;MruG010956;MruG011330;MruG011615;MruG013017;MruG013431;MruG013949;MruG014231;MruG0142…	K05954+K14066+K01662+K01662+K03527+K08658+K13789+K13789+K11778+K03527+K01597+K05906+K01662+K00787+K00787+K03527+K00099+K05356+K05356+K05356+K13789+K03527+K03526+K05955+K00919+K00787+K00099+K15892+K00099+K00626+K03527+K00938+K05906+K15891+K01662+K00919+K00919+K00919+K00099+K03527+K00626+K03527+K12742+K12742+K12742+K00099+K00099+K03527+K03527+K13789+K03527+K11778+K03527+K01770+K01641+K01641+K13789+…
Indole alkaloid biosynthesis	ko00901	13	MruG010848;MruG011634;MruG020405;MruG023561;MruG030698;MruG037557;MruG037558;MruG037559;MruG037562;MruG042450;MruG043885;MruG043886;MruG043888;	K01757+K01757+K01757+K01757+K01757+K01757+K01757+K01757+K01757+K01757+K01757+K01757+K01757
Monoterpenoid biosynthesis	ko00902	65	MruG001435;MruG001437;MruG001442;MruG001443;MruG001812;MruG001813;MruG001820;MruG001821;MruG001822;MruG001823;MruG001829;MruG003106;MruG004379;MruG004383;MruG004384;MruG004390;MruG004927;MruG004930;MruG004931;MruG004933;MruG005240;MruG005695;MruG010053;MruG010054;MruG010057;MruG010060;MruG010061;MruG019176;MruG021944;MruG021945;MruG025736;MruG025737;MruG025742;MruG027488;MruG027489;MruG027490;Mru…	K23810+K23810+K23810+K23810+K23810+K23810+K23810+K23810+K23810+K23810+K23810+K23810+K23232+K23232+K23232+K23232+K23810+K23810+K23810+K23810+K23810+K23810+K23810+K23810+K23810+K23810+K23810+K23810+K23810+K23810+K23810+K23810+K23810+K23232+K23232+K23232+K23232+K23232+K23232+K23232+K23232+K23232+K23232+K23232+K23232+K23232+K23232+K23810+K23810+K23810+K23810+K23810+K23810+K23810+K23810+K23810+K23810+…
Limonene and pinene degradation	ko00903	20	MruG001354;MruG004312;MruG004314;MruG004316;MruG008767;MruG008979;MruG011555;MruG015440;MruG016228;MruG021072;MruG024562;MruG035876;MruG035883;MruG042031;MruG042581;MruG043562;MruG044575;MruG046692;MruG047231;MruG049984;	K00128+K00128+K00128+K00128+K00128+K00128+K00128+K00128+K00128+K00128+K00128+K00128+K00128+K00128+K00128+K00128+K01692+K00128+K00128+K00128
Diterpenoid biosynthesis	ko00904	78	MruG000718;MruG000870;MruG001046;MruG001048;MruG001517;MruG002257;MruG002258;MruG002283;MruG002303;MruG002375;MruG003303;MruG004210;MruG004557;MruG005573;MruG006561;MruG007144;MruG007147;MruG007609;MruG008424;MruG008425;MruG008489;MruG009174;MruG009348;MruG009385;MruG009912;MruG010551;MruG010552;MruG011184;MruG011186;MruG011187;MruG011930;MruG012919;MruG012921;MruG012922;MruG013546;MruG016326;Mru…	K17961+K04124+K04125+K04123+K04123+K04125+K04125+K04125+K04125+K04125+K04125+K05282+K04125+K05282+K04122+K17982+K17982+K04125+K04123+K04123+K04125+K04125+K04125+K04125+K04125+K04125+K04125+K04125+K04123+K04123+K04124+K04123+K04123+K04123+K04121+K05282+K05282+K04120+K04125+K04125+K05282+K05282+K17961+K04125+K17961+K04123+K04125+K04123+K04123+K04125+K04120+K04120+K04120+K04125+K04120+K05282+K04120+…
Brassinosteroid biosynthesis	ko00905	26	MruG000248;MruG014889;MruG021009;MruG026691;MruG026778;MruG029968;MruG029971;MruG031954;MruG032071;MruG032827;MruG033368;MruG034736;MruG034737;MruG034738;MruG034870;MruG035319;MruG036043;MruG038121;MruG040133;MruG040318;MruG040320;MruG040321;MruG040322;MruG042583;MruG042662;MruG043997;	K15639+K09588+K09591+K09587+K12637+K09588+K09588+K09590+K12639+K09591+K09587+K09590+K09590+K09590+K12639+K12639+K09591+K15639+K12638+K20623+K20623+K20623+K20623+K12637+K09587+K15639
Carotenoid biosynthesis	ko00906	80	MruG000384;MruG000849;MruG000850;MruG001648;MruG001848;MruG002790;MruG003133;MruG003575;MruG004178;MruG004588;MruG005424;MruG006317;MruG006318;MruG006320;MruG009883;MruG010789;MruG010792;MruG011077;MruG012588;MruG014018;MruG014019;MruG015623;MruG015628;MruG015820;MruG015900;MruG015910;MruG015924;MruG017852;MruG019470;MruG019890;MruG020668;MruG021772;MruG022010;MruG022435;MruG022482;MruG022484;Mru…	K09843+K09838+K09838+K09835+K09843+K09837+K09835+K17911+K00514+K17911+K15746+K09838+K09838+K09838+K09840+K14593+K14593+K09841+K09841+K02291+K02291+K17911+K17911+K02291+K02293+K02293+K15744+K17913+K09838+K06444+K09837+K09843+K09841+K14595+K09843+K09843+K02293+K09840+K15744+K15747+K09838+K09838+K14595+K09838+K09840+K09840+K09840+K09840+K09840+K09843+K14595+K02291+K09842+K09842+K02291+K09841+K09841+…
Zeatin biosynthesis	ko00908	104	Medicago_ruthenica_newGene_5743;MruG000640;MruG002784;MruG003670;MruG005446;MruG006067;MruG006150;MruG006824;MruG007780;MruG008525;MruG009151;MruG009155;MruG009162;MruG010225;MruG012211;MruG013009;MruG014844;MruG014845;MruG014846;MruG014847;MruG014848;MruG017108;MruG018101;MruG019511;MruG020093;MruG020543;MruG021054;MruG021058;MruG024188;MruG027527;MruG027528;MruG028355;MruG028518;MruG028913;MruG…	K00279+K00279+K13496+K10760+K13496+K00279+K10760+K23452+K10760+K13495+K00279+K00279+K00279+K00791+K23452+K00279+K13493+K13493+K13493+K13493+K13493+K13496+K00279+K13496+K00279+K00791+K13493+K13493+K13495+K23452+K23452+K13496+K13496+K23452+K13496+K13496+K23452+K23452+K23452+K23452+K23452+K23452+K23452+K23452+K23452+K23452+K23452+K23452+K23452+K23452+K23452+K23452+K23452+K23452+K23452+K23452+K23452+…
Sesquiterpenoid and triterpenoid biosynthesis	ko00909	72	Medicago_ruthenica_newGene_8476;MruG002981;MruG002982;MruG005462;MruG006282;MruG007010;MruG007031;MruG007032;MruG010515;MruG010946;MruG010958;MruG010961;MruG010962;MruG010963;MruG010966;MruG011785;MruG013007;MruG013788;MruG014139;MruG014220;MruG014221;MruG014222;MruG014524;MruG014525;MruG014526;MruG014527;MruG014767;MruG017218;MruG017401;MruG018551;MruG018554;MruG021451;MruG022185;MruG022931;MruG…	K00511+K15803+K15803+K14175+K14175+K00511+K14175+K14175+K15803+K14175+K15803+K14175+K15803+K14175+K15803+K14175+K15813+K14175+K14175+K14175+K14175+K14175+K14175+K14175+K14175+K14175+K14175+K15891+K00511+K15813+K15813+K00801+K15803+K14175+K14175+K00511+K15472+K15800+K15472+K14175+K15803+K15803+K15803+K15803+K15803+K15803+K14175+K20659+K20659+K14173+K14175+K14175+K15813+K15813+K20658+K15813+K14175+…
Nitrogen metabolism	ko00910	52	Medicago_ruthenica_newGene_9458;MruG000265;MruG000271;MruG001189;MruG002051;MruG002774;MruG002777;MruG002782;MruG002916;MruG002918;MruG005687;MruG006948;MruG007736;MruG007738;MruG007739;MruG007742;MruG014318;MruG014650;MruG015114;MruG015115;MruG015117;MruG015425;MruG015426;MruG018013;MruG020669;MruG020670;MruG020681;MruG022481;MruG023018;MruG025788;MruG026228;MruG027677;MruG028747;MruG028750;MruG…	K01915+K00262+K00262+K00264+K01725+K01915+K01915+K01915+K01674+K01674+K01455+K01673+K01915+K01915+K01915+K01915+K01915+K01915+K10534+K10534+K10534+K01673+K01673+K01455+K02575+K02575+K01674+K00366+K01674+K00366+K00261+K01673+K10534+K10534+K01673+K01915+K01673+K00261+K01915+K00261+K00284+K01674+K01674+K01455+K00262+K00262+K01673+K02575+K02575+K02575+K01455+K00261
Sulfur metabolism	ko00920	70	Medicago_ruthenica_newGene_1317;Medicago_ruthenica_newGene_6220;Medicago_ruthenica_newGene_9507;MruG003173;MruG004189;MruG004193;MruG005606;MruG005696;MruG007075;MruG007125;MruG007873;MruG007899;MruG009655;MruG009660;MruG009947;MruG013512;MruG015867;MruG015870;MruG015876;MruG018776;MruG019422;MruG021895;MruG022578;MruG022579;MruG022833;MruG023331;MruG025638;MruG026162;MruG026385;MruG026958;MruG03…	K01738+K01738+K01738+K01738+K01738+K01738+K13811+K01738+K01082+K01082+K05907+K05907+K01011+K01011+K17725+K00640+K17285+K17285+K17285+K01738+K00860+K00392+K01738+K01738+K01082+K15422+K01738+K22966+K00860+K00640+K00640+K01738+K00640+K00640+K00640+K00640+K00640+K00640+K00640+K00640+K00640+K00640+K00640+K00640+K00640+K00640+K00640+K00640+K00640+K00640+K00640+K00640+K01739+K13811+K13811+K13811+K00387+…
Phenylpropanoid biosynthesis	ko00940	491	Medicago_ruthenica_newGene_254;Medicago_ruthenica_newGene_3336;Medicago_ruthenica_newGene_5364;Medicago_ruthenica_newGene_7453;Medicago_ruthenica_newGene_8252;Medicago_ruthenica_newGene_8255;MruG000037;MruG000040;MruG000177;MruG000852;MruG000900;MruG000947;MruG000948;MruG000951;MruG001749;MruG001750;MruG001751;MruG001777;MruG001877;MruG002354;MruG002518;MruG002631;MruG002632;MruG002634;MruG002672…	K00430+K00083+K00430+K05350+K01188+K01188+K00430+K00083+K00430+K13065+K00430+K00430+K00430+K00430+K13066+K13066+K13066+K13066+K00430+K01188+K00588+K00430+K00430+K00430+K10775+K01904+K01904+K01904+K00430+K01904+K22395+K00430+K00430+K00430+K10775+K13065+K12355+K00430+K00430+K00430+K00487+K05350+K18368+K00430+K00430+K13065+K00430+K00430+K00430+K00430+K00430+K22395+K00083+K00083+K12355+K05350+K05350+…
Flavonoid biosynthesis	ko00941	158	Medicago_ruthenica_newGene_2563;Medicago_ruthenica_newGene_2985;Medicago_ruthenica_newGene_2987;Medicago_ruthenica_newGene_2990;Medicago_ruthenica_newGene_2992;Medicago_ruthenica_newGene_5073;Medicago_ruthenica_newGene_5599;Medicago_ruthenica_newGene_6129;Medicago_ruthenica_newGene_6130;Medicago_ruthenica_newGene_6780;Medicago_ruthenica_newGene_7029;Medicago_ruthenica_newGene_896;Medicago_rutheni…	K00660+K00660+K00660+K00660+K00660+K00660+K00660+K00660+K00660+K13082+K05278+K00660+K00660+K13082+K13082+K13065+K00588+K13082+K13082+K13081+K13065+K13082+K01859+K23179+K23179+K00487+K01859+K01859+K01859+K01859+K13065+K08695+K13082+K01859+K01859+K13082+K13065+K22845+K22845+K05280+K05280+K05280+K05280+K13065+K13065+K13065+K13083+K13083+K13083+K13065+K13065+K13065+K13065+K05278+K05278+K05278+K05278+…
Anthocyanin biosynthesis	ko00942	4	MruG006968;MruG012541;MruG045048;MruG045051;	K12930+K21383+K12930+K12930
Isoflavonoid biosynthesis	ko00943	126	MruG001660;MruG001662;MruG005752;MruG005761;MruG005954;MruG005956;MruG006628;MruG006630;MruG008870;MruG008872;MruG011013;MruG011015;MruG011019;MruG011020;MruG012850;MruG012854;MruG013517;MruG013525;MruG013527;MruG013528;MruG013530;MruG013539;MruG013540;MruG013544;MruG013547;MruG013554;MruG013556;MruG013557;MruG013581;MruG014011;MruG016162;MruG019504;MruG019795;MruG019796;MruG019798;MruG019855;Mru…	K13267+K13267+K13258+K13258+K23179+K23179+K13267+K13267+K22932+K22932+K13264+K13264+K13264+K13264+K13264+K13264+K13267+K13267+K13267+K13267+K13267+K13267+K13267+K13267+K13267+K13267+K13267+K13267+K13267+K13258+K13264+K13265+K13259+K13259+K13259+K22932+K23179+K23179+K23179+K13266+K13266+K13266+K13260+K13257+K13257+K13259+K13257+K13257+K13257+K13259+K13262+K22932+K13260+K13260+K13260+K13258+K13258+…
Flavone and flavonol biosynthesis	ko00944	70	MruG004823;MruG004824;MruG007290;MruG007292;MruG010575;MruG010576;MruG010578;MruG010579;MruG010580;MruG010581;MruG010582;MruG010585;MruG010586;MruG010587;MruG010588;MruG010589;MruG010747;MruG010748;MruG011013;MruG011015;MruG011019;MruG011020;MruG012471;MruG012472;MruG012732;MruG012734;MruG012738;MruG012740;MruG012850;MruG012854;MruG013213;MruG013214;MruG013218;MruG016162;MruG020737;MruG020738;Mru…	K22772+K22772+K22794+K22794+K22794+K22794+K22794+K22794+K22794+K22794+K22794+K22794+K22794+K22794+K22794+K22794+K22794+K22794+K13264+K13264+K13264+K13264+K22794+K22794+K05280+K05280+K05280+K05280+K13264+K13264+K13083+K13083+K13083+K13264+K22772+K22772+K22794+K22794+K22771+K13264+K13264+K13264+K13264+K13264+K13264+K13264+K13264+K13264+K13264+K13264+K13264+K13264+K13264+K13264+K13264+K13264+K05280+…
Stilbenoid, diarylheptanoid and gingerol biosynthesis	ko00945	61	MruG000852;MruG002518;MruG005077;MruG006194;MruG006791;MruG009015;MruG012787;MruG012809;MruG012810;MruG013905;MruG013906;MruG013910;MruG013911;MruG016000;MruG016866;MruG018664;MruG018668;MruG018670;MruG022036;MruG022456;MruG023596;MruG023597;MruG023599;MruG023600;MruG023670;MruG023671;MruG023753;MruG025056;MruG025058;MruG026217;MruG027167;MruG029499;MruG029501;MruG029503;MruG029507;MruG029549;Mru…	K13065+K00588+K13065+K00487+K13065+K13065+K13065+K13065+K13065+K13065+K13065+K13065+K13065+K13065+K13065+K13065+K13065+K13065+K16040+K00588+K13065+K13065+K13065+K13065+K16040+K16040+K13065+K00588+K00588+K13065+K13065+K16040+K16040+K16040+K16040+K00487+K00487+K00588+K13065+K13065+K13065+K13065+K00588+K13065+K13065+K13065+K13065+K09754+K13065+K13065+K00588+K13065+K13065+K00588+K00588+K00588+K00588+…
Isoquinoline alkaloid biosynthesis	ko00950	112	Medicago_ruthenica_newGene_2664;Medicago_ruthenica_newGene_361;Medicago_ruthenica_newGene_6018;MruG000723;MruG000769;MruG001672;MruG002024;MruG005574;MruG005575;MruG005717;MruG005722;MruG005725;MruG005727;MruG005731;MruG006476;MruG007155;MruG007561;MruG008242;MruG008784;MruG008837;MruG011165;MruG013300;MruG013314;MruG013316;MruG013323;MruG013326;MruG013609;MruG014499;MruG014642;MruG015359;MruG015…	K15849+K14455+K15849+K01593+K00811+K00276+K01593+K22097+K22097+K00276+K00276+K00276+K00276+K00276+K01593+K00422+K00815+K01593+K01593+K00815+K00815+K14455+K14455+K14455+K14455+K14455+K00276+K00815+K14975+K00276+K00276+K00276+K21580+K00276+K14454+K00815+K01593+K01593+K01593+K01593+K01593+K01593+K13390+K00276+K14455+K14455+K14455+K00276+K00276+K00276+K00276+K22097+K22097+K22097+K22097+K22097+K22097+…
Tropane, piperidine and pyridine alkaloid biosynthesis	ko00960	80	Medicago_ruthenica_newGene_2664;Medicago_ruthenica_newGene_361;Medicago_ruthenica_newGene_6018;MruG000769;MruG001075;MruG001672;MruG003523;MruG005173;MruG005717;MruG005722;MruG005725;MruG005727;MruG005731;MruG007561;MruG008837;MruG010152;MruG011165;MruG013300;MruG013314;MruG013316;MruG013323;MruG013326;MruG013609;MruG014499;MruG014776;MruG014777;MruG014778;MruG014779;MruG014786;MruG014791;MruG014…	K15849+K14455+K15849+K00811+K08081+K00276+K08081+K00817+K00276+K00276+K00276+K00276+K00276+K00815+K00815+K08081+K00815+K14455+K14455+K14455+K14455+K14455+K00276+K00815+K08081+K08081+K08081+K08081+K08081+K08081+K08081+K00276+K00276+K00276+K00276+K14454+K00815+K18606+K18606+K18606+K08081+K08081+K08081+K08081+K00276+K14455+K14455+K14455+K08081+K00276+K00276+K00276+K00276+K08081+K00817+K00817+K00815+…
Betalain biosynthesis	ko00965	62	MruG000723;MruG002024;MruG006476;MruG008242;MruG008784;MruG013097;MruG016839;MruG019187;MruG019218;MruG019245;MruG019248;MruG019251;MruG019254;MruG025965;MruG026716;MruG027573;MruG028974;MruG028989;MruG031697;MruG031701;MruG033318;MruG033320;MruG033464;MruG034483;MruG034584;MruG034585;MruG035777;MruG035783;MruG035858;MruG035860;MruG035862;MruG035871;MruG035872;MruG035873;MruG035990;MruG035992;Mru…	K01593+K01593+K01593+K01593+K01593+K15777+K15777+K01593+K01593+K01593+K01593+K01593+K01593+K15777+K15777+K15777+K15777+K15777+K15777+K15777+K15777+K15777+K15777+K15777+K01593+K01593+K01593+K01593+K01593+K01593+K01593+K01593+K01593+K01593+K01593+K01593+K01593+K01593+K01593+K01593+K01593+K01593+K01593+K01593+K01593+K01593+K01593+K01593+K01593+K15777+K15777+K15777+K15777+K15777+K01593+K01593+K15777+…
Glucosinolate biosynthesis	ko00966	59	Medicago_ruthenica_newGene_1258;Medicago_ruthenica_newGene_3722;Medicago_ruthenica_newGene_641;Medicago_ruthenica_newGene_6961;Medicago_ruthenica_newGene_7878;Medicago_ruthenica_newGene_8055;MruG000215;MruG003704;MruG007589;MruG011085;MruG014107;MruG014243;MruG014244;MruG014245;MruG014407;MruG014408;MruG014409;MruG014410;MruG014411;MruG014412;MruG014413;MruG014414;MruG014415;MruG014416;MruG014417…	K12153+K12153+K12153+K12153+K12153+K12153+K12153+K01703+K12153+K12153+K01703+K12153+K12153+K12153+K12153+K12153+K12153+K12153+K12153+K12153+K12153+K12153+K12153+K12153+K12153+K12153+K12153+K12153+K12153+K12153+K12153+K12153+K12153+K12153+K12153+K12153+K12153+K00826+K00826+K00826+K00826+K00826+K00826+K00826+K00826+K00826+K00826+K00826+K12153+K12153+K12153+K12153+K00826+K12153+K12153+K12153+K12153+…
Aminoacyl-tRNA biosynthesis	ko00970	195	Medicago_ruthenica_newGene_2014;Medicago_ruthenica_newGene_257;Medicago_ruthenica_newGene_3609;Medicago_ruthenica_newGene_3614;Medicago_ruthenica_newGene_7981;Medicago_ruthenica_newGene_8883;MruG000093;MruG000187;MruG000733;MruG001102;MruG002112;MruG002690;MruG003092;MruG003192;MruG004267;MruG004468;MruG005154;MruG005546;MruG005846;MruG005868;MruG006132;MruG006139;MruG006457;MruG006460;MruG006708…	K01887+K22503+K02434+K02434+K01876+K01892+K01873+K02433+K22503+K01866+K01875+K01872+K01870+K01870+K01875+K01885+K02435+K01873+K22503+K01887+K01883+K01886+K01874+K01874+K00604+K01890+K02433+K01870+K01890+K04567+K04567+K02433+K01870+K04567+K01893+K01867+K01868+K01880+K01880+K02433+K02434+K01880+K01880+K01870+K01870+K01870+K01870+K01869+K01869+K01866+K01866+K02433+K01869+K01869+K01870+K01870+K01870+…
Biosynthesis of various secondary metabolites - part 2	ko00998	2	MruG027247;MruG042375;	K21568+K21568
Biosynthesis of unsaturated fatty acids	ko01040	31	MruG001307;MruG002323;MruG003260;MruG006242;MruG016013;MruG016015;MruG016016;MruG016378;MruG019458;MruG020160;MruG020801;MruG022042;MruG022574;MruG024097;MruG024098;MruG024255;MruG026189;MruG030343;MruG036132;MruG036646;MruG037776;MruG039206;MruG040801;MruG042183;MruG043176;MruG044019;MruG046089;MruG046213;MruG046362;MruG046363;MruG046364;	K03921+K07513+K10256+K10256+K10251+K10251+K10251+K03921+K07513+K03921+K10703+K00232+K03921+K10251+K10251+K00232+K00232+K10258+K00232+K01068+K10256+K10249+K01068+K10703+K00232+K10251+K07513+K00232+K00232+K00232+K00232
Carbon metabolism	ko01200	517	Medicago_ruthenica_newGene_1317;Medicago_ruthenica_newGene_2848;Medicago_ruthenica_newGene_2849;Medicago_ruthenica_newGene_361;Medicago_ruthenica_newGene_3736;Medicago_ruthenica_newGene_3737;Medicago_ruthenica_newGene_4145;Medicago_ruthenica_newGene_42;Medicago_ruthenica_newGene_5315;Medicago_ruthenica_newGene_6220;Medicago_ruthenica_newGene_7069;Medicago_ruthenica_newGene_808;Medicago_ruthenica_…	K01738+K00029+K00029+K14455+K01623+K01623+K01689+K00029+K00162+K01738+K00134+K00121+K01689+K00658+K01738+K05605+K00121+K00844+K00281+K05605+K00121+K00131+K01803+K01057+K01057+K00164+K00162+K00162+K01647+K00297+K00025+K00030+K01754+K01637+K00873+K01623+K00026+K01738+K00844+K01900+K01681+K01681+K00025+K00873+K00131+K00025+K01738+K01738+K11517+K01679+K00850+K00850+K00051+K00131+K00627+K00873+K00850+…
2-Oxocarboxylic acid metabolism	ko01210	143	Medicago_ruthenica_newGene_1258;Medicago_ruthenica_newGene_361;Medicago_ruthenica_newGene_3722;Medicago_ruthenica_newGene_563;Medicago_ruthenica_newGene_641;Medicago_ruthenica_newGene_6961;Medicago_ruthenica_newGene_7878;Medicago_ruthenica_newGene_8055;MruG000215;MruG000769;MruG000809;MruG001621;MruG001622;MruG001870;MruG001895;MruG001900;MruG001903;MruG001905;MruG001906;MruG002675;MruG003704;Mru…	K12153+K14455+K12153+K14677+K12153+K12153+K12153+K12153+K12153+K00811+K00145+K00145+K00145+K01647+K14677+K14677+K14677+K14677+K14677+K00030+K01703+K01681+K01681+K14677+K01649+K01652+K12153+K01647+K01647+K01647+K00031+K01681+K01687+K12153+K00053+K00052+K14455+K14455+K14455+K14455+K14455+K01647+K01703+K12153+K12153+K12153+K12153+K12153+K12153+K12153+K12153+K12153+K12153+K12153+K12153+K12153+K12153+…
Fatty acid metabolism	ko01212	119	MruG001307;MruG001380;MruG001644;MruG002323;MruG002488;MruG003260;MruG003359;MruG004258;MruG004560;MruG005636;MruG005637;MruG005745;MruG006046;MruG006047;MruG006242;MruG006679;MruG006870;MruG007285;MruG008720;MruG008737;MruG008739;MruG008740;MruG008745;MruG009305;MruG011416;MruG011596;MruG012080;MruG014291;MruG015166;MruG015741;MruG015748;MruG015872;MruG015873;MruG015878;MruG015880;MruG015983;Mru…	K03921+K01897+K01897+K07513+K00059+K10256+K09458+K00059+K01897+K09458+K09458+K01897+K10781+K10781+K10256+K02372+K02372+K00648+K00249+K10527+K10527+K10527+K10527+K09458+K07512+K00665+K00648+K00645+K11262+K01897+K00626+K01897+K01897+K01897+K01897+K00059+K10251+K10251+K10251+K01897+K03921+K10781+K00648+K18660+K18660+K00626+K00059+K07513+K10781+K03921+K09458+K00645+K10703+K00665+K01897+K00208+K00232+…
Biosynthesis of amino acids	ko01230	445	Medicago_ruthenica_newGene_1317;Medicago_ruthenica_newGene_2427;Medicago_ruthenica_newGene_2664;Medicago_ruthenica_newGene_2774;Medicago_ruthenica_newGene_361;Medicago_ruthenica_newGene_3736;Medicago_ruthenica_newGene_3737;Medicago_ruthenica_newGene_4145;Medicago_ruthenica_newGene_5057;Medicago_ruthenica_newGene_563;Medicago_ruthenica_newGene_5939;Medicago_ruthenica_newGene_6018;Medicago_ruthenic…	K01738+K10206+K15849+K12657+K14455+K01623+K01623+K01689+K05359+K14677+K00789+K15849+K00789+K01738+K00134+K01689+K01915+K01738+K00611+K01850+K01850+K00811+K00145+K01803+K00264+K01693+K01658+K00145+K00145+K00286+K01663+K01663+K01647+K14677+K14677+K14677+K14677+K14677+K00549+K01760+K00030+K01657+K00789+K01915+K01915+K01915+K01754+K00873+K01623+K01738+K01695+K01703+K01681+K01681+K00873+K13832+K01620+…
ABC transporters	ko02010	258	Medicago_ruthenica_newGene_1479;Medicago_ruthenica_newGene_220;Medicago_ruthenica_newGene_2550;Medicago_ruthenica_newGene_556;Medicago_ruthenica_newGene_5884;Medicago_ruthenica_newGene_8634;Medicago_ruthenica_newGene_8723;Medicago_ruthenica_newGene_9136;MruG000084;MruG000085;MruG000853;MruG000854;MruG001168;MruG001555;MruG001598;MruG002000;MruG002456;MruG002723;MruG003134;MruG003135;MruG003373;Mr…	K05658+K05665+K05666+K05665+K05681+K05658+K05665+K05666+K05658+K05658+K08712+K08712+K05658+K05658+K05658+K02195+K08712+K05658+K05681+K05681+K05666+K05666+K05658+K05658+K05658+K05658+K05658+K05658+K05666+K08712+K05681+K05681+K05666+K05681+K05681+K05643+K05658+K05665+K05665+K05681+K05665+K05665+K05665+K05658+K05658+K05658+K05658+K05665+K05665+K05665+K05665+K05665+K05658+K05681+K05677+K05658+K05658+…
Ribosome biogenesis in eukaryotes	ko03008	272	Medicago_ruthenica_newGene_1068;Medicago_ruthenica_newGene_2645;Medicago_ruthenica_newGene_4188;Medicago_ruthenica_newGene_4927;Medicago_ruthenica_newGene_5015;Medicago_ruthenica_newGene_5531;Medicago_ruthenica_newGene_6060;Medicago_ruthenica_newGene_6848;Medicago_ruthenica_newGene_7196;Medicago_ruthenica_newGene_8258;Medicago_ruthenica_newGene_83;Medicago_ruthenica_newGene_8699;Medicago_ruthenic…	K14525+K11108+K14565+K14558+K14565+K14554+K14567+K11130+K14558+K18532+K14558+K14550+K14563+K12619+K14570+K14558+K14548+K14558+K03097+K14538+K14570+K14570+K14558+K14521+K14558+K14558+K14544+K14538+K14556+K07178+K14552+K14552+K14544+K14558+K14558+K14544+K14549+K14549+K14544+K11883+K11883+K11883+K11883+K14566+K14544+K14571+K14553+K14521+K14521+K14544+K14574+K07179+K14521+K18532+K07936+K14558+K14558+…
Ribosome	ko03010	543	Medicago_ruthenica_newGene_1443;Medicago_ruthenica_newGene_209;Medicago_ruthenica_newGene_2428;Medicago_ruthenica_newGene_2586;Medicago_ruthenica_newGene_2957;Medicago_ruthenica_newGene_2977;Medicago_ruthenica_newGene_3072;Medicago_ruthenica_newGene_3481;Medicago_ruthenica_newGene_3509;Medicago_ruthenica_newGene_3551;Medicago_ruthenica_newGene_4063;Medicago_ruthenica_newGene_4320;Medicago_rutheni…	K02932+K02995+K02995+K02998+K02980+K02973+K02973+K02980+K02943+K02995+K02927+K02995+K02995+K02995+K02949+K02973+K02927+K02919+K02995+K02995+K02995+K02987+K02995+K02872+K02985+K02909+K02937+K02996+K02938+K02938+K02949+K02991+K02900+K02913+K02913+K02894+K02902+K02898+K02879+K02971+K02959+K02981+K02898+K02959+K02997+K02885+K02894+K02890+K02902+K02985+K02930+K02895+K02997+K02918+K02918+K02878+K02930+…
RNA transport	ko03013	458	Medicago_ruthenica_newGene_1068;Medicago_ruthenica_newGene_2420;Medicago_ruthenica_newGene_2565;Medicago_ruthenica_newGene_2708;Medicago_ruthenica_newGene_3135;Medicago_ruthenica_newGene_336;Medicago_ruthenica_newGene_3632;Medicago_ruthenica_newGene_4585;Medicago_ruthenica_newGene_4817;Medicago_ruthenica_newGene_5268;Medicago_ruthenica_newGene_5430;Medicago_ruthenica_newGene_5764;Medicago_rutheni…	K14525+K14301+K12160+K14300+K10577+K14300+K14300+K14300+K03243+K14300+K03231+K13126+K14300+K03257+K14300+K14300+K14300+K14300+K14301+K03243+K14300+K03243+K14300+K13175+K03231+K14292+K13126+K14292+K14319+K14291+K03231+K14004+K14004+K12812+K14304+K03231+K00784+K14320+K03259+K13176+K14317+K14317+K14292+K14297+K14297+K14297+K14303+K14289+K14289+K14289+K14289+K18655+K13126+K18655+K14004+K03260+K14319+…
mRNA surveillance pathway	ko03015	228	Medicago_ruthenica_newGene_1249;Medicago_ruthenica_newGene_1636;Medicago_ruthenica_newGene_2920;Medicago_ruthenica_newGene_4643;Medicago_ruthenica_newGene_5764;Medicago_ruthenica_newGene_6333;Medicago_ruthenica_newGene_7771;Medicago_ruthenica_newGene_9552;MruG000237;MruG000397;MruG000820;MruG000886;MruG001310;MruG002129;MruG002135;MruG002381;MruG002387;MruG002421;MruG002755;MruG002798;MruG002800;…	K14400+K14400+K03267+K14400+K13126+K06965+K04354+K04354+K14399+K13126+K12812+K11584+K15542+K06269+K06269+K04354+K14400+K14396+K11584+K18655+K13126+K14400+K18655+K14396+K14396+K14396+K14411+K06269+K11583+K06269+K11583+K14407+K14407+K13126+K14397+K03456+K03456+K11584+K14404+K11584+K13025+K14399+K14328+K14403+K14294+K13114+K14409+K14411+K14404+K12812+K13126+K13025+K12876+K13126+K14404+K14325+K14411+…
RNA degradation	ko03018	285	Medicago_ruthenica_newGene_1927;Medicago_ruthenica_newGene_4145;Medicago_ruthenica_newGene_4200;Medicago_ruthenica_newGene_5705;Medicago_ruthenica_newGene_5764;Medicago_ruthenica_newGene_5934;Medicago_ruthenica_newGene_715;Medicago_ruthenica_newGene_7733;Medicago_ruthenica_newGene_8088;MruG000124;MruG000397;MruG000479;MruG000516;MruG000705;MruG000732;MruG000847;MruG001114;MruG001453;MruG002604;Mr…	K04077+K01689+K00962+K00962+K13126+K14442+K04077+K12606+K01689+K12619+K13126+K14442+K04077+K00962+K12592+K12603+K12586+K12589+K10643+K03678+K13126+K12581+K12581+K12606+K14442+K12603+K12608+K01148+K12591+K04077+K07573+K07573+K12608+K14442+K04077+K04077+K00850+K00850+K08311+K00850+K14442+K13126+K12616+K14442+K12603+K04043+K14442+K12580+K12617+K03678+K14442+K12616+K12617+K13126+K00850+K12599+K00850+…
RNA polymerase	ko03020	127	Medicago_ruthenica_newGene_3379;Medicago_ruthenica_newGene_3380;Medicago_ruthenica_newGene_4281;Medicago_ruthenica_newGene_4712;Medicago_ruthenica_newGene_6123;Medicago_ruthenica_newGene_6417;Medicago_ruthenica_newGene_8517;Medicago_ruthenica_newGene_9757;MruG000149;MruG000180;MruG000242;MruG000243;MruG000287;MruG000364;MruG000414;MruG001058;MruG001059;MruG001060;MruG001445;MruG002962;MruG003066;…	K03007+K03007+K03006+K03006+K03006+K03006+K03023+K03046+K03010+K03016+K03021+K03021+K03011+K03016+K03016+K03046+K03046+K03046+K03024+K03043+K03016+K03006+K03026+K03023+K03023+K03022+K03012+K03012+K03012+K03017+K03000+K03046+K03046+K03021+K03021+K03010+K03013+K03021+K03027+K03010+K03021+K03021+K03021+K03021+K03021+K03021+K03021+K03021+K03021+K03021+K03004+K03000+K03000+K03040+K03021+K03026+K03026+…
Basal transcription factors	ko03022	99	Medicago_ruthenica_newGene_2699;Medicago_ruthenica_newGene_3608;Medicago_ruthenica_newGene_3613;Medicago_ruthenica_newGene_3667;Medicago_ruthenica_newGene_4125;Medicago_ruthenica_newGene_7642;Medicago_ruthenica_newGene_8991;MruG000743;MruG001185;MruG001384;MruG001657;MruG002322;MruG002468;MruG002469;MruG002470;MruG002471;MruG002888;MruG003367;MruG004281;MruG004401;MruG004811;MruG005608;MruG006069…	K03129+K10845+K10845+K03131+K03131+K03129+K03129+K02202+K03142+K03143+K03133+K03135+K03124+K03124+K03124+K03124+K03126+K02202+K06634+K03122+K03141+K14649+K03122+K03120+K03138+K03138+K03138+K03131+K10844+K03122+K03131+K02202+K10842+K10844+K03124+K03120+K03143+K14649+K03132+K03122+K03129+K03129+K03129+K03130+K03139+K03122+K03120+K03144+K03122+K03122+K03133+K03137+K03137+K10843+K02202+K03137+K03127+…
DNA replication	ko03030	291	Medicago_ruthenica_newGene_1547;Medicago_ruthenica_newGene_1586;Medicago_ruthenica_newGene_1885;Medicago_ruthenica_newGene_1913;Medicago_ruthenica_newGene_1965;Medicago_ruthenica_newGene_2299;Medicago_ruthenica_newGene_2870;Medicago_ruthenica_newGene_4292;Medicago_ruthenica_newGene_4402;Medicago_ruthenica_newGene_4718;Medicago_ruthenica_newGene_5560;MruG000218;MruG000572;MruG000855;MruG000938;Mru…	K07466+K07466+K02326+K07466+K07466+K07466+K07466+K07466+K07466+K07466+K07466+K07466+K02327+K07466+K10739+K10754+K07466+K07466+K02327+K07466+K07466+K07466+K03111+K04799+K04799+K07466+K07466+K07466+K02327+K07466+K07466+K07466+K03505+K02335+K07466+K10743+K10740+K10740+K07466+K07466+K07466+K07466+K07466+K07466+K07466+K07466+K07466+K07466+K07466+K07466+K10755+K07466+K07466+K07466+K07466+K07466+K07466+…
Spliceosome	ko03040	673	Medicago_ruthenica_newGene_177;Medicago_ruthenica_newGene_1856;Medicago_ruthenica_newGene_2001;Medicago_ruthenica_newGene_2676;Medicago_ruthenica_newGene_2914;Medicago_ruthenica_newGene_4302;Medicago_ruthenica_newGene_4874;Medicago_ruthenica_newGene_5149;Medicago_ruthenica_newGene_5752;Medicago_ruthenica_newGene_5822;Medicago_ruthenica_newGene_5833;Medicago_ruthenica_newGene_6465;Medicago_rutheni…	K12818+K12818+K03283+K03283+K12818+K12826+K12818+K03283+K11098+K11087+K12817+K11094+K12900+K03283+K03283+K12818+K03283+K12844+K12900+K12874+K12874+K12891+K12891+K12818+K03283+K03283+K03283+K03283+K12818+K12812+K12816+K12855+K12896+K03283+K12818+K03283+K03283+K03283+K03283+K03283+K11984+K12891+K03283+K12836+K12891+K12874+K12837+K03283+K10599+K12818+K12818+K12891+K12818+K12891+K12856+K12896+K12891+…
Proteasome	ko03050	114	Medicago_ruthenica_newGene_2233;Medicago_ruthenica_newGene_5007;Medicago_ruthenica_newGene_6856;MruG000035;MruG000201;MruG000345;MruG000550;MruG000995;MruG000997;MruG001140;MruG001149;MruG001155;MruG002003;MruG002298;MruG003168;MruG003319;MruG004305;MruG004309;MruG004311;MruG005131;MruG005144;MruG005975;MruG006265;MruG006912;MruG007501;MruG008499;MruG008604;MruG008782;MruG009035;MruG009426;MruG00…	K02736+K02736+K02736+K03033+K02725+K03030+K03031+K03036+K03036+K03032+K03032+K03032+K03035+K02736+K03035+K03062+K03065+K03065+K03065+K03061+K02725+K03033+K02729+K02736+K03030+K03032+K03032+K02735+K03029+K02730+K02726+K02731+K02725+K02732+K03035+K03035+K06699+K02731+K03038+K02737+K10881+K02736+K06691+K02738+K02738+K03036+K03036+K03064+K02725+K02725+K03033+K03064+K02736+K03035+K02736+K02725+K11599+…
Protein export	ko03060	95	Medicago_ruthenica_newGene_5219;MruG000114;MruG000320;MruG003450;MruG003457;MruG003458;MruG003462;MruG003463;MruG003465;MruG003551;MruG003950;MruG004166;MruG004231;MruG004514;MruG005437;MruG006044;MruG007005;MruG008625;MruG009356;MruG009974;MruG009978;MruG010561;MruG011314;MruG011980;MruG012841;MruG013345;MruG015404;MruG015963;MruG016020;MruG016266;MruG016268;MruG016278;MruG016280;MruG016826;MruG…	K09648+K13431+K03100+K09647+K09648+K09647+K09648+K09648+K09647+K03109+K03070+K03116+K09481+K03070+K03116+K03118+K03100+K10956+K03100+K09647+K09647+K10956+K09481+K13280+K12948+K12275+K09648+K12946+K03217+K03100+K03070+K03070+K03070+K03100+K03104+K09540+K03106+K03116+K03100+K09481+K03217+K12272+K03070+K03108+K12946+K09481+K03107+K09490+K09490+K03100+K10956+K10956+K09648+K09648+K12272+K12947+K07342+…
Base excision repair	ko03410	114	Medicago_ruthenica_newGene_1885;Medicago_ruthenica_newGene_5377;MruG000572;MruG002839;MruG003696;MruG004462;MruG004466;MruG004678;MruG004686;MruG004687;MruG004689;MruG004951;MruG005834;MruG005847;MruG006130;MruG006639;MruG007513;MruG008859;MruG009360;MruG009564;MruG010132;MruG010284;MruG010923;MruG011140;MruG011616;MruG011914;MruG012022;MruG012653;MruG013296;MruG013608;MruG013884;MruG014174;MruG0…	K02326+K10802+K02327+K10773+K02327+K04799+K04799+K02327+K10798+K10798+K10798+K10773+K03505+K02335+K10773+K10771+K10563+K03648+K02327+K01246+K03504+K10798+K02335+K10798+K10773+K10803+K10563+K10771+K04802+K02327+K02335+K10771+K01142+K03660+K02327+K02327+K02335+K01246+K01247+K10798+K01246+K10798+K10798+K02327+K03505+K10798+K02324+K10747+K03506+K10798+K03648+K03648+K03648+K03648+K03648+K03648+K03648+…
Nucleotide excision repair	ko03420	309	Medicago_ruthenica_newGene_1547;Medicago_ruthenica_newGene_1586;Medicago_ruthenica_newGene_1885;Medicago_ruthenica_newGene_1913;Medicago_ruthenica_newGene_1965;Medicago_ruthenica_newGene_2299;Medicago_ruthenica_newGene_2870;Medicago_ruthenica_newGene_3608;Medicago_ruthenica_newGene_3613;Medicago_ruthenica_newGene_4292;Medicago_ruthenica_newGene_4402;Medicago_ruthenica_newGene_4718;Medicago_ruthen…	K07466+K07466+K02326+K07466+K07466+K07466+K07466+K10845+K10845+K07466+K07466+K07466+K07466+K07466+K02327+K02202+K07466+K10739+K03142+K10754+K03143+K07466+K02202+K10841+K07466+K03657+K02327+K07466+K07466+K10849+K10849+K06634+K07466+K07466+K07466+K07466+K02327+K03141+K07466+K07466+K07466+K03505+K02335+K07466+K10839+K10740+K10740+K07466+K07466+K07466+K07466+K07466+K07466+K07466+K07466+K07466+K07466+…
Mismatch repair	ko03430	277	Medicago_ruthenica_newGene_1547;Medicago_ruthenica_newGene_1586;Medicago_ruthenica_newGene_1913;Medicago_ruthenica_newGene_1965;Medicago_ruthenica_newGene_2299;Medicago_ruthenica_newGene_2870;Medicago_ruthenica_newGene_4292;Medicago_ruthenica_newGene_4402;Medicago_ruthenica_newGene_4718;Medicago_ruthenica_newGene_5560;MruG000218;MruG000572;MruG000855;MruG000893;MruG000938;MruG001383;MruG003272;Mr…	K07466+K07466+K07466+K07466+K07466+K07466+K07466+K07466+K07466+K07466+K07466+K02327+K07466+K08737+K10739+K10754+K07466+K07466+K03657+K02327+K07466+K07466+K07466+K03111+K07466+K07466+K07466+K02327+K10858+K07466+K07466+K07456+K07466+K08736+K03505+K07466+K10740+K10740+K07466+K07466+K07466+K07466+K07466+K07466+K07466+K07466+K07466+K07466+K07466+K07466+K10755+K07466+K07466+K07466+K07466+K07466+K07466+…
Homologous recombination	ko03440	401	Medicago_ruthenica_newGene_1547;Medicago_ruthenica_newGene_1586;Medicago_ruthenica_newGene_1913;Medicago_ruthenica_newGene_1965;Medicago_ruthenica_newGene_2299;Medicago_ruthenica_newGene_2870;Medicago_ruthenica_newGene_3252;Medicago_ruthenica_newGene_4292;Medicago_ruthenica_newGene_4402;Medicago_ruthenica_newGene_4613;Medicago_ruthenica_newGene_4718;Medicago_ruthenica_newGene_5560;MruG000010;MruG…	K07466+K07466+K07466+K07466+K07466+K07466+K12173+K07466+K07466+K08775+K07466+K07466+K15362+K12173+K07466+K12173+K02327+K10867+K10683+K07466+K10739+K10728+K03655+K03165+K12173+K12173+K12173+K07466+K07466+K02327+K07466+K07466+K10875+K10875+K10875+K07466+K03111+K12173+K10683+K07466+K07466+K07466+K10728+K02327+K07466+K07466+K07466+K10683+K10683+K03505+K02335+K07466+K10740+K10740+K07466+K07466+K07466+…
Non-homologous end-joining	ko03450	20	MruG003813;MruG004462;MruG004466;MruG006619;MruG009074;MruG010448;MruG015859;MruG019497;MruG025963;MruG027193;MruG027203;MruG028023;MruG028846;MruG033024;MruG040048;MruG040369;MruG041782;MruG042754;MruG045780;MruG049428;	K10886+K04799+K04799+K10884+K10777+K10865+K10866+K10885+K10865+K10865+K10865+K03512+K10866+K03512+K10866+K10884+K10866+K10865+K10886+K10866
MAPK signaling pathway - plant	ko04016	664	Medicago_ruthenica_newGene_1445;Medicago_ruthenica_newGene_1694;Medicago_ruthenica_newGene_23;Medicago_ruthenica_newGene_2354;Medicago_ruthenica_newGene_2584;Medicago_ruthenica_newGene_3573;Medicago_ruthenica_newGene_4225;Medicago_ruthenica_newGene_4228;Medicago_ruthenica_newGene_4602;Medicago_ruthenica_newGene_5199;Medicago_ruthenica_newGene_6303;Medicago_ruthenica_newGene_6404;Medicago_ruthenic…	K14509+K13422+K16224+K14498+K20535+K13422+K20535+K20535+K13447+K20535+K20727+K20772+K14497+K20551+K14498+K14512+K20535+K13447+K20557+K14496+K20726+K20718+K13424+K14497+K14515+K13425+K00940+K13416+K13416+K13416+K13416+K13416+K13416+K13416+K13416+K13416+K13416+K13416+K13416+K13416+K13416+K13416+K13416+K13416+K13416+K14497+K14496+K20558+K20725+K20725+K13420+K13420+K13416+K13416+K13416+K13416+K13416+…
Phosphatidylinositol signaling system	ko04070	167	Medicago_ruthenica_newGene_6077;Medicago_ruthenica_newGene_7347;Medicago_ruthenica_newGene_8799;Medicago_ruthenica_newGene_9349;MruG000097;MruG000188;MruG000275;MruG000475;MruG000671;MruG001586;MruG001886;MruG002770;MruG002824;MruG003584;MruG003721;MruG003746;MruG003929;MruG004015;MruG004016;MruG004939;MruG004940;MruG004942;MruG004943;MruG005217;MruG005220;MruG005232;MruG005272;MruG005719;MruG005…	K00981+K00981+K00981+K00981+K18081+K10572+K01099+K05857+K00981+K00901+K01099+K00889+K18081+K02183+K02183+K18081+K18081+K18081+K01099+K18081+K18081+K18081+K18081+K18081+K18081+K00921+K20279+K00981+K00913+K00981+K01110+K00981+K10047+K00981+K10047+K10047+K18081+K05857+K00981+K00901+K00889+K00889+K00889+K00889+K05857+K02183+K00889+K19801+K00981+K05857+K05857+K00889+K18081+K00889+K18081+K19801+K19801+…
Plant hormone signal transduction	ko04075	1048	Medicago_ruthenica_newGene_1445;Medicago_ruthenica_newGene_1694;Medicago_ruthenica_newGene_2354;Medicago_ruthenica_newGene_2728;Medicago_ruthenica_newGene_3573;Medicago_ruthenica_newGene_3578;Medicago_ruthenica_newGene_4623;Medicago_ruthenica_newGene_7078;Medicago_ruthenica_newGene_7353;Medicago_ruthenica_newGene_7521;Medicago_ruthenica_newGene_7796;Medicago_ruthenica_newGene_7805;Medicago_ruthen…	K14509+K13422+K14498+K14486+K13422+K14486+K14484+K14497+K14498+K14512+K12126+K14486+K14486+K14486+K14484+K14484+K14488+K14486+K14503+K14491+K14506+K14499+K12126+K12126+K14496+K14497+K14489+K14491+K14491+K14515+K13415+K14488+K14486+K13416+K13416+K13416+K13416+K13415+K13416+K13415+K13416+K13416+K13416+K13416+K13416+K13416+K13416+K13416+K13416+K13416+K13416+K13416+K13416+K14497+K14496+K14494+K13416+…
Ubiquitin mediated proteolysis	ko04120	406	Medicago_ruthenica_newGene_1844;Medicago_ruthenica_newGene_1845;Medicago_ruthenica_newGene_2256;Medicago_ruthenica_newGene_2263;Medicago_ruthenica_newGene_2266;Medicago_ruthenica_newGene_2369;Medicago_ruthenica_newGene_2371;Medicago_ruthenica_newGene_2402;Medicago_ruthenica_newGene_2513;Medicago_ruthenica_newGene_2765;Medicago_ruthenica_newGene_3135;Medicago_ruthenica_newGene_3837;Medicago_ruthen…	K08770+K08770+K08770+K08770+K08770+K08770+K08770+K08770+K10581+K10576+K10577+K04506+K03352+K02927+K03094+K03358+K10592+K02927+K08770+K08770+K08770+K06689+K10260+K10144+K04506+K04506+K10615+K06689+K03875+K03875+K10571+K10615+K03347+K10599+K04506+K10144+K10590+K10590+K10590+K10604+K03363+K03354+K10260+K10260+K10260+K10592+K04506+K10576+K10260+K04506+K04506+K04506+K02977+K06688+K10615+K10615+K03094+…
Sulfur relay system	ko04122	11	MruG006397;MruG009458;MruG009655;MruG009660;MruG013201;MruG018526;MruG026342;MruG030815;MruG037654;MruG040996;MruG047952;	K03637+K03639+K01011+K01011+K03635+K14168+K04487+K11996+K14169+K12161+K11996
SNARE interactions in vesicular transport	ko04130	76	Medicago_ruthenica_newGene_1098;Medicago_ruthenica_newGene_5915;Medicago_ruthenica_newGene_7576;Medicago_ruthenica_newGene_8395;MruG002640;MruG002641;MruG002703;MruG003083;MruG003084;MruG003518;MruG003520;MruG003522;MruG004347;MruG004403;MruG004404;MruG005497;MruG007078;MruG007099;MruG008189;MruG010911;MruG010912;MruG011316;MruG012058;MruG013051;MruG013676;MruG013785;MruG014033;MruG014663;MruG015…	K08505+K08506+K08486+K08486+K08506+K08506+K08495+K08486+K08486+K08504+K08504+K08504+K08489+K08486+K08486+K08517+K08486+K08486+K08497+K08486+K08486+K08506+K08495+K08493+K08503+K08500+K08496+K08486+K08486+K08490+K08495+K08495+K08486+K08486+K08486+K08486+K08486+K08486+K08486+K08488+K08493+K08505+K08505+K08486+K08515+K08496+K08500+K08490+K08493+K08486+K08488+K08490+K08490+K08490+K08490+K08492+K08493+…
Autophagy - other	ko04136	72	Medicago_ruthenica_newGene_1985;Medicago_ruthenica_newGene_5376;Medicago_ruthenica_newGene_6394;MruG002454;MruG002980;MruG003504;MruG003507;MruG004534;MruG006395;MruG007458;MruG007865;MruG007869;MruG010890;MruG012553;MruG014182;MruG015305;MruG015322;MruG015323;MruG015387;MruG015388;MruG015389;MruG016487;MruG016786;MruG016787;MruG017368;MruG017369;MruG019266;MruG019574;MruG019577;MruG019917;MruG02…	K07203+K08334+K08336+K17606+K08334+K17907+K17907+K08341+K17888+K08266+K08341+K08341+K08341+K08334+K08343+K17890+K08343+K08343+K08333+K08333+K08333+K17606+K08331+K08269+K08343+K08343+K08269+K08341+K08341+K08343+K08337+K08341+K17906+K00914+K00914+K04382+K08331+K08331+K17890+K07203+K08343+K00914+K00914+K00914+K04382+K08334+K08331+K08331+K08339+K17908+K08333+K08333+K07204+K08342+K17907+K00914+K04382+…
Protein processing in endoplasmic reticulum	ko04141	587	Medicago_ruthenica_newGene_1551;Medicago_ruthenica_newGene_1621;Medicago_ruthenica_newGene_2001;Medicago_ruthenica_newGene_2676;Medicago_ruthenica_newGene_3214;Medicago_ruthenica_newGene_369;Medicago_ruthenica_newGene_3987;Medicago_ruthenica_newGene_4089;Medicago_ruthenica_newGene_4135;Medicago_ruthenica_newGene_4140;Medicago_ruthenica_newGene_4144;Medicago_ruthenica_newGene_4149;Medicago_rutheni…	K08852+K08852+K03283+K03283+K08852+K04079+K04079+K14009+K04079+K04079+K04079+K09487+K03094+K04079+K04079+K04079+K03283+K13719+K01230+K16196+K04079+K09580+K04079+K03283+K03283+K04079+K08852+K04079+K03283+K04079+K01230+K09580+K04079+K14007+K14007+K01230+K09487+K10666+K10666+K06689+K03283+K14014+K03283+K03283+K03283+K13993+K13993+K13993+K13993+K13993+K14004+K14004+K13525+K03283+K03283+K03283+K03283+…
Endocytosis	ko04144	492	Medicago_ruthenica_newGene_175;Medicago_ruthenica_newGene_2001;Medicago_ruthenica_newGene_2676;Medicago_ruthenica_newGene_2993;Medicago_ruthenica_newGene_2994;Medicago_ruthenica_newGene_3133;Medicago_ruthenica_newGene_3383;Medicago_ruthenica_newGene_3786;Medicago_ruthenica_newGene_3892;Medicago_ruthenica_newGene_4206;Medicago_ruthenica_newGene_5117;Medicago_ruthenica_newGene_5149;Medicago_rutheni…	K01528+K03283+K03283+K07937+K07937+K07937+K07937+K04646+K12188+K07937+K01528+K03283+K19476+K07937+K12191+K12191+K01528+K12191+K07937+K03283+K03283+K07937+K04646+K03283+K12493+K18468+K11827+K03283+K03283+K03283+K03283+K12471+K11866+K03283+K12472+K12472+K03283+K03283+K03283+K03283+K03283+K07904+K12486+K12189+K03283+K03283+K05758+K12492+K07901+K04645+K00889+K17917+K03283+K07937+K07904+K12192+K03283+…
Phagosome	ko04145	175	Medicago_ruthenica_newGene_1597;Medicago_ruthenica_newGene_4115;Medicago_ruthenica_newGene_4996;Medicago_ruthenica_newGene_5707;Medicago_ruthenica_newGene_7556;Medicago_ruthenica_newGene_7932;Medicago_ruthenica_newGene_8518;Medicago_ruthenica_newGene_8522;Medicago_ruthenica_newGene_9129;MruG001528;MruG001579;MruG001736;MruG001948;MruG002653;MruG002693;MruG002773;MruG004231;MruG004362;MruG005053;M…	K07375+K02153+K02146+K07375+K02153+K07375+K07375+K07375+K07375+K02154+K02154+K02155+K02150+K02152+K07375+K07374+K09481+K08057+K07889+K02154+K00921+K07897+K07897+K08517+K07374+K02147+K01365+K10956+K01365+K10956+K02154+K04392+K02154+K09481+K02154+K02151+K07897+K07889+K02154+K07889+K02150+K04392+K01365+K01365+K02154+K08054+K12182+K07374+K07374+K07374+K07374+K07374+K02154+K07375+K00921+K07374+K07374+…
Peroxisome	ko04146	170	MruG000254;MruG000641;MruG001026;MruG001380;MruG001644;MruG001733;MruG001738;MruG002323;MruG002410;MruG002688;MruG003183;MruG003837;MruG004290;MruG004325;MruG004560;MruG005064;MruG005542;MruG005745;MruG005770;MruG005910;MruG006358;MruG006361;MruG006575;MruG006576;MruG007326;MruG007392;MruG007917;MruG007956;MruG009522;MruG009525;MruG009561;MruG009852;MruG009859;MruG009860;MruG010414;MruG010730;Mru…	K13352+K13346+K13348+K01897+K01897+K13354+K13354+K07513+K04564+K13343+K13356+K13347+K11517+K08726+K01897+K13343+K03781+K01897+K13354+K13348+K01578+K01578+K13345+K13345+K17879+K13341+K13347+K01578+K05677+K00031+K08726+K11517+K11517+K11517+K13348+K13356+K13356+K13348+K08726+K08726+K00106+K13344+K13342+K01640+K01640+K13354+K04564+K04564+K13347+K01897+K01897+K01897+K01897+K01897+K12663+K05677+K01897+…
Plant-pathogen interaction	ko04626	1226	Medicago_ruthenica_newGene_1140;Medicago_ruthenica_newGene_1202;Medicago_ruthenica_newGene_1313;Medicago_ruthenica_newGene_1327;Medicago_ruthenica_newGene_1353;Medicago_ruthenica_newGene_1426;Medicago_ruthenica_newGene_1540;Medicago_ruthenica_newGene_1549;Medicago_ruthenica_newGene_174;Medicago_ruthenica_newGene_2255;Medicago_ruthenica_newGene_2275;Medicago_ruthenica_newGene_2276;Medicago_rutheni…	K13430+K13459+K13459+K13459+K13457+K13459+K16225+K16226+K15397+K13459+K13459+K16226+K16224+K13430+K13436+K04079+K16225+K04079+K13430+K13459+K13459+K13459+K13459+K04079+K04079+K04079+K09487+K13436+K13447+K04079+K13430+K13459+K04079+K16226+K04079+K16225+K13459+K13436+K13430+K13448+K04079+K16225+K16226+K16225+K13436+K13457+K04079+K13430+K13430+K13436+K14512+K04079+K13459+K04079+K04079+K13447+K04079+…
Circadian rhythm - plant	ko04712	139	Medicago_ruthenica_newGene_2563;Medicago_ruthenica_newGene_2985;Medicago_ruthenica_newGene_2987;Medicago_ruthenica_newGene_2990;Medicago_ruthenica_newGene_2992;Medicago_ruthenica_newGene_5073;Medicago_ruthenica_newGene_5599;Medicago_ruthenica_newGene_6129;Medicago_ruthenica_newGene_6130;Medicago_ruthenica_newGene_7796;Medicago_ruthenica_newGene_7992;Medicago_ruthenica_newGene_896;Medicago_rutheni…	K00660+K00660+K00660+K00660+K00660+K00660+K00660+K00660+K00660+K12126+K12120+K00660+K00660+K12126+K12126+K12125+K12135+K03097+K16221+K12119+K12119+K12129+K12133+K16221+K12119+K12126+K12120+K12124+K16221+K12126+K12135+K12135+K16221+K16221+K16222+K12121+K12115+K12116+K16240+K12126+K03097+K03097+K03097+K03097+K12127+K16222+K12133+K12135+K00660+K00660+K00660+K00660+K00660+K12130+K12130+K12126+K12125+…

## Sheet: Table S5
Table S5 Differential expressed genes of PFM and YFM
Gene ID	Original Gene ID	PFM-1_FPKM	PFM-2_FPKM	PFM-3_FPKM	YFM-1_FPKM	YFM-2_FPKM	YFM-3_FPKM	Fold change	log2Fold change	regulated
MruG001150		3.83707	2.87258	3.88896	0.060269	0.041339	0.01178	2.29104e-42	-4.8656	down
MruG001151		2.43456	1.03247	1.33539	5.01677	3.93219	3.31868	2.95199e-05	1.257	up
MruG001156		2.2485	2.25511	2.58878	0.170656	0.087339	0.127776	1.22941e-24	-3.40622	down
MruG032894		1.33058	1.16932	1.63251	0.523904	0.509645	0.570083	8.8377e-07	-1.22592	down
MruG032899		10.0496	12.7964	10.1915	1.6057	2.26391	3.177	1.59154e-11	-1.96413	down
MruG035320		54.0343	56.2961	53.105	12.8029	18.4368	19.1629	4.01473e-23	-1.60372	down
MruG004010		1.27542	1.35495	0.493176	5.68621	5.20229	5.77124	6.75554e-20	2.28343	up
MruG021020		9.56454	9.86813	8.83994	1.61101	1.17565	1.06209	3.015e-57	-2.71037	down
MruG004012		0.850754	0.793992	1.24781	2.91766	2.00653	2.63239	4.75361e-09	1.34267	up
MruG035817		0.918945	0.686501	0.447548	3.86999	3.45922	4.11516	3.95379e-19	2.3141	up
MruG035810		0.491293	0.54253	0.536663	1.22762	1.09571	1.06959	0.00101567	1.03201	up
MruG010515		10.3882	11.1736	11.2865	0.033168	0.203651	0	0.000145649	-1.90823	down
MruG037410		0.690243	0.615757	0.667852	0.12657	0.10677	0.088305	6.73979e-15	-2.27682	down
MruG028959		1.54228	2.13279	2.99083	0.230413	0.254874	0.118422	4.14451e-11	-2.63647	down
MruG017326		49.8457	49.3803	53.209	125.29	146.41	153.556	1.49265e-38	1.50251	up
MruG023561		1.41839	1.36622	1.1063	0.172338	0.298446	0.254195	4.06043e-05	-1.75952	down
MruG018176		20.8584	20.1623	16.0224	7.34121	4.30541	6.19027	5.60982e-07	-1.45608	down
MruG037488		4.22198	4.13503	4.02503	1.20392	1.0019	0.677186	9.48026e-22	-1.94839	down
MruG020033		32.2778	35.6743	40.4023	6.43332	9.13037	6.9113	3.37263e-20	-2.08961	down
MruG042340		3.2434	3.30247	3.13099	0.803721	1.44238	1.37836	0.000316125	-1.20187	down
MruG000283		85.5358	83.9	81.1228	0.913192	1.01358	0.909143	0	-6.28458	down
MruG043561		0.25576	0.295015	0.339535	1.67458	1.13373	1.07664	1.11707e-05	1.72003	up
MruG043563		8.31913	7.43098	8.31484	3.39779	2.48294	4.3851	6.3765e-07	-1.11708	down
MruG001393		4.074	4.21611	5.47336	1.95144	1.34617	0.949198	2.56817e-08	-1.49988	down
MruG024259		6.58316	5.2745	6.60852	0.900381	0.887455	1.04256	1.37015e-24	-2.46929	down
MruG039304		5.11482	7.26728	5.83798	0	0	0	1.44615e-43	-5.58771	down
MruG039305		8.8895	7.56783	13.3356	0	0	0	4.32174e-19	-4.05328	down
MruG039302		2.71882	3.50233	2.61447	0.632112	0.676016	1.06701	7.59516e-06	-1.57563	down
MruG039303		4.20176	6.53355	4.23632	0	0	0	2.57195e-13	-3.4592	down
MruG031489		5.21715	2.47742	3.85266	0.495101	0.872682	0.44437	3.35756e-06	-1.96279	down
MruG014101		23.3628	23.3983	23.3107	8.00732	7.45655	8.3086	2.03244e-18	-1.4609	down
MruG041951		23.3364	26.4327	24.0778	59.0519	57.0226	55.5048	6.02614e-34	1.24794	up
MruG047675		3.15536	3.32312	4.45205	0.549123	0.77505	0.768864	1.78308e-17	-2.16878	down
MruG047674		0.109718	0.031461	0.223156	3.20036	2.31156	3.06394	1.08928e-24	3.65389	up
MruG025610		1.65904	2.02041	2.54187	0.192685	0.383886	0.471669	1.34824e-07	-2.02365	down
MruG030682		2.52406	2.58057	2.60448	0.683577	0.904802	0.423	2.46048e-08	-1.68293	down
MruG049946		20.5298	19.5427	18.4625	5.79979	4.75208	6.75395	8.26301e-30	-1.66379	down
MruG049948		1.74468	1.23644	1.50068	3.59992	2.63376	3.20077	9.94449e-06	1.05369	up
MruG023767		38.9491	42.2849	36.7053	16.7559	15.0651	14.0626	1.22918e-16	-1.2752	down
MruG031971		7.94809	7.72044	8.36592	0	0	0	3.19349e-49	-5.8288	down
MruG027440		8.17161	8.311	7.34518	3.21767	2.30894	2.27669	3.88679e-11	-1.4656	down
MruG027443		0.03393	0.039107	0.119122	0.737638	0.798571	0.765816	1.76234e-07	2.37657	up
MruG020238		0.492587	1.09843	0.219837	1.78001	1.75295	2.24104	0.000578046	1.38208	up
MruG029516		0	0	0	1.17368	1.75407	1.34593	1.62015e-14	3.58596	up
MruG019687		376.619	391.251	371.989	110.124	119.605	138.154	4.01703e-74	-1.5713	down
MruG014551		0.224461	0.191097	0.173313	0.926568	0.776338	0.718276	6.44176e-06	1.69423	up
MruG040849		0.324379	0.240608	0.127773	3.50782	3.77856	3.51009	1.60646e-25	3.36861	up
MruG011893		39.2547	43.9543	40.8369	0	0	0	5.05125e-105	-7.6646	down
MruG004898		1.80391	1.88147	1.52062	0.977636	0.626471	0.677034	0.00124524	-1.00389	down
MruG027741		0.341221	0.514465	0.342498	1.73512	1.70481	1.64759	5.07152e-06	1.73538	up
MruG030743		9.26289	8.41635	9.4584	4.55605	3.4995	3.89563	1.00567e-13	-1.10543	down
MruG012043		2.92472	2.36775	2.07845	5.69423	4.9397	4.88806	4.58038e-05	1.04128	up
MruG012045		23.4666	22.1497	22.3171	56.594	48.2196	50.5451	5.59408e-44	1.22944	up
MruG029897		15.7645	16.25	14.4621	3.69901	3.51557	4.52069	3.19398e-18	-1.83477	down
MruG029896		3.85934	4.78123	5.42766	0.220893	0.428535	0.108373	9.31641e-14	-3.03148	down
MruG004278		17.0135	15.4651	17.6946	5.96633	5.2206	5.72546	1.88187e-51	-1.50386	down
MruG038364		0.616481	0.675613	0.610785	8.40518	7.89456	8.06188	1.09672e-79	3.55953	up
MruG042550		43.9969	41.1074	42.4804	88.1267	119.871	120.499	2.9813e-24	1.38416	up
MruG039188		1.54744	1.08894	1.24668	4.97289	3.81143	3.26568	1.66719e-12	1.58129	up
MruG038984		0.789318	1.66787	0.694197	0.232464	0.267234	0.395753	0.00279314	-1.31334	down
MruG016688		107.339	126.126	115.722	49.4212	49.574	57.9392	4.45304e-33	-1.09609	down
MruG034270		1.84517	1.23405	2.14617	0.264218	0.13704	0.250193	3.58944e-13	-2.47399	down
MruG006123		1.97586	1.78264	1.49293	0.476066	0.254156	0.485561	2.03681e-09	-1.81626	down
MruG002582		20.4391	17.5716	17.1297	42.0824	38.4329	43.8231	3.45075e-35	1.2082	up
MruG040306		12.7512	16.1648	12.6226	1.09013	1.31962	1.09915	2.49705e-52	-3.30896	down
MruG040307		9.33753	7.22031	7.45284	0.813813	0.769154	1.02154	3.76748e-44	-2.97722	down
MruG040300		1.5063	2.52684	2.7708	14.7789	13.2858	16.5869	5.92567e-31	2.59002	up
MruG040308		1.81006	1.66346	1.3891	0	0.0455	0.015082	6.23825e-42	-4.89217	down
MruG027930		2.09785	1.45558	1.23265	4.35387	3.77111	3.54132	5.1961e-08	1.25303	up
MruG021096		0.602976	0.605308	0.213545	3.84593	1.99086	3.0178	3.24082e-06	1.97452	up
MruG039115		13.2451	12.9128	11.8935	3.87756	3.85176	4.20183	2.01173e-27	-1.58714	down
MruG049358		0.174152	0.187519	0.218464	0.502289	0.505463	0.51111	0.00445449	1.13214	up
MruG041167		7.49165	7.41141	6.5473	13.3426	15.6976	15.6355	2.66026e-08	1.06305	up
MruG034535		3.71443	5.29616	4.01681	8.17523	11.367	10.9269	1.12218e-06	1.1833	up
MruG034537		2.15302	1.05098	1.34926	0.478685	0.683766	0.598272	0.009465	-1.05542	down
MruG034530		1.19676	2.02708	1.44379	3.93433	2.66063	6.04374	0.000865919	1.24553	up
MruG048972		4.77213	5.00312	5.20931	1.86221	1.10692	1.39771	3.1061e-06	-1.49844	down
MruG048971		9.09536	8.39613	6.59943	1.18017	0.954552	1.35068	2.4103e-33	-2.58472	down
MruG048976		16.1953	16.3857	15.5576	6.52546	7.67682	7.75057	5.30874e-13	-1.06284	down
MruG024270		123.422	139.925	137.444	326.397	387.067	414.17	1.30816e-58	1.5258	up
MruG037379		0.291948	0.317562	0.2284	0.011602	0	0.026324	6.45883e-09	-2.66485	down
MruG049386		11.4935	13.1596	10.7018	4.69276	4.57861	5.56905	4.90477e-15	-1.1744	down
MruG023480		58.192	55.4881	51.7903	15.7987	15.4735	15.6962	1.22038e-90	-1.75328	down
MruG034880		16.8842	18.1396	22.9026	4.67463	3.12616	5.5937	2.07241e-10	-1.85059	down
MruG012209		1.45644	1.26659	1.00224	0.814237	0.221839	0.363835	0.00120152	-1.15768	down
MruG014331		1.06738	1.37891	1.17982	0.377328	0.202612	0.485545	0.000276589	-1.39903	down
MruG029303		1.83368	1.74675	2.11851	4.82151	5.05095	7.63458	4.66496e-05	1.41193	up
MruG016185		1.10736	1.43719	1.06751	10.9963	10.7533	12.1809	2.49123e-85	3.17943	up
MruG013649		3.22358	2.61576	2.9102	0.934262	1.2713	0.786431	1.2686e-05	-1.33657	down
MruG044249		6.09549	6.50131	5.20786	16.7564	12.151	11.5567	1.09335e-07	1.16405	up
MruG044241		2.92457	3.57407	2.70778	0.090901	0	0	3.84305e-33	-4.59764	down
MruG018348		98.5536	94.0696	94.7305	37.8201	40.5966	41.0454	1.11508e-61	-1.21221	down
MruG003477		1.66122	0.495768	2.6284	7.47207	9.13235	6.96396	1.55457e-05	1.78573	up
MruG047205		0.250166	0.031472	0	4.59279	3.49508	3.99965	3.89877e-12	3.1467	up
MruG007885		21.7714	16.9953	20.313	55.3717	54.4462	51.1368	7.16844e-54	1.47768	up
MruG000358		12.8072	10.8262	11.7936	36.0487	31.9222	29.0239	6.90852e-41	1.47903	up
MruG005952		4.73941	3.88146	3.78995	8.6901	8.04063	8.1422	7.72194e-11	1.02072	up
MruG048445		51.3987	47.7516	52.9202	128.755	124.614	140.719	5.43813e-67	1.40958	up
MruG039841		0.411572	0.411102	0.431799	0.025221	0.022865	0.054204	5.36121e-07	-2.29649	down
MruG027010		0	0	0	4.63026	4.04447	3.56414	5.20343e-17	3.83897	up
MruG024534		9.77424	10.3633	10.1952	1.86412	1.35794	1.71121	2.93224e-41	-2.45824	down
MruG002467		4.35139	4.56425	4.5516	18.3636	13.1932	14.1885	3.01407e-22	1.74524	up
MruG024094		1.42898	1.28029	1.24175	0.080982	0	0.025215	4.21063e-12	-3.07694	down
MruG025329		15.9866	14.6208	12.9936	3.74425	5.25364	4.15515	6.32323e-18	-1.61782	down
MruG025321		1.29621	1.56759	1.49154	5.38225	5.05804	5.75394	4.81021e-26	1.86645	up
MruG037949		4.75494	3.62951	3.90039	0.67915	0.913749	0.873231	4.5497e-14	-2.06212	down
MruG034764		42.0766	43.8677	42.1962	2.7103	2.6417	2.17027	3.05637e-265	-3.97476	down
MruG018101		1.51207	1.51378	1.27499	0.079119	0.038509	0.037578	1.95756e-17	-3.33664	down
MruG037498		80.9819	84.5515	76.4197	41.0262	36.1277	35.1128	7.99068e-49	-1.05353	down
MruG022670		5.21357	5.89935	4.95789	12.4151	11.3682	13.3693	2.86279e-21	1.23203	up
MruG032387		1.15127	1.16329	1.14683	0.385041	0.185218	0.327683	7.50275e-06	-1.57533	down
MruG032388		2.84864	1.73838	1.74203	0.723538	0.613159	0.814041	2.02331e-06	-1.35752	down
MruG037238		12.859	14.09	11.7687	1.7436	1.38398	2.2106	2.59391e-46	-2.68932	down
MruG037237		4.65241	5.54549	3.82418	0.797676	0.270346	0.543962	4.10872e-13	-2.53077	down
MruG036728		10.8335	11.4997	12.3968	4.21844	4.27326	3.47171	9.05364e-19	-1.44364	down
MruG045804		1.2629	2.41505	3.12159	7.43537	6.3441	7.16848	9.59821e-08	1.51345	up
MruG026009		18.3205	17.1429	17.3718	0.334986	0.767463	0.86729	1.1356e-114	-4.50077	down
MruG027752		0.790214	0.761478	0.881515	0.070681	0.32471	0.270409	0.00643046	-1.28526	down
MruG018955		3.1777	1.73932	2.77005	0.829951	0.707994	1.10835	0.00610057	-1.16017	down
MruG022886		2.73941	4.27338	2.5927	7.0598	8.3435	5.38602	0.00363081	1.00646	up
MruG029176		1.027	0.816523	0.98031	0.297865	0.285588	0.266776	0.00125843	-1.3179	down
MruG021340		3.22801	5.53018	4.10409	0.427941	0.613536	0.468965	6.65715e-18	-2.67319	down
MruG021342		1.50419	2.79447	3.14182	0.265747	0.35199	0.299865	2.74199e-09	-2.30972	down
MruG021348		3.6247	4.92885	2.36675	1.55433	0.512303	1.02257	1.86268e-06	-1.54548	down
MruG019775		10.7356	8.62029	7.93024	0	0	0	3.29845e-20	-4.14087	down
MruG019774		2.6902	3.80087	2.73476	0	0	0	1.81478e-32	-5.00248	down
MruG004140		17.2596	18.2933	18.4774	32.8091	32.4335	43.5113	3.99102e-11	1.02873	up
MruG004146		0.164616	0	0.078118	7.69104	6.24607	5.96492	3.99183e-12	3.22	up
MruG017846		0.556358	0.543279	0.672809	0.21774	0.136831	0	0.00631692	-1.37585	down
MruG005360		2.80882	3.95964	2.72573	1.64786	0.838606	0.813976	0.000499438	-1.24463	down
MruG005468		1.50927	0.961719	1.43735	2.21925	3.07626	3.0274	0.00013943	1.04067	up
MruG038479		4.63989	5.08692	4.99854	0.883317	0.692265	1.46247	2.99256e-11	-1.98831	down
MruG038475		120.729	128.144	127.541	50.0501	61.168	61.7863	1.33229e-24	-1.06263	down
MruG016694		2.04671	2.84105	2.67217	9.47238	7.85519	8.01283	1.9198e-26	1.73926	up
MruG036523		1.06574	1.14456	1.27682	0.069702	0.202736	0.227287	2.17905e-09	-2.2608	down
MruG048498		4.1429	4.2399	4.4393	2.37534	1.73432	1.85715	9.61567e-15	-1.03317	down
MruG005357		1.40012	1.64521	1.45506	7.01922	7.2939	7.11272	2.53043e-32	2.20669	up
MruG020180		0	0	0	2.45995	1.71631	2.29092	9.98703e-16	3.7127	up
MruG020184		39.8144	42.8644	42.9635	112.265	94.9789	104.861	1.08146e-70	1.3509	up
MruG032990		95.1453	93.8234	104.125	41.4501	45.1176	41.0123	1.81868e-31	-1.14164	down
MruG021102		10.0516	9.00509	8.26974	4.09853	3.89289	3.90378	3.25187e-13	-1.12045	down
MruG032178		2.54109	3.1199	2.82464	1.31001	1.30358	1.21106	0.000196045	-1.01101	down
MruG032173		2.7343	3.90981	4.04354	0	0	0	1.16918e-36	-5.24275	down
MruG032171		2.23598	2.02065	2.18848	0	0	0	6.08531e-26	-4.57554	down
MruG020777		1.67789	1.83824	1.12542	3.68607	2.47378	3.39163	6.25401e-06	1.03041	up
MruG029811		35.1099	33.1577	32.3625	18.5214	14.6372	14.4743	4.79562e-21	-1.01578	down
MruG012599		13.6574	12.4917	13.4368	39.6206	51.3145	53.4841	2.00109e-26	1.84645	up
MruG042263		5.40369	7.4512	5.34167	20.9411	19.6779	19.7085	1.1037e-28	1.72827	up
MruG012621		26.9678	28.3099	26.2852	10.22	12.1706	10.4497	2.42932e-13	-1.22589	down
MruG038900		0.965586	0.808974	0.668898	0.305372	0.267521	0.339313	2.29894e-05	-1.23675	down
MruG044662		0.97705	0.99638	0.759163	4.69199	4.19622	3.93106	2.20405e-44	2.21071	up
MruG030820		2.4499	1.96551	2.1349	0.10984	0.67458	0.282575	1.90695e-05	-1.88172	down
MruG018621		3.0468	2.39346	1.89047	1.11241	0.252955	0.563704	0.000749447	-1.43225	down
MruG018626		2.31171	2.60605	2.57827	6.02492	6.3721	6.08257	2.39196e-11	1.2914	up
MruG018624		7.73996	8.15054	7.79391	3.65204	3.63959	3.5001	1.50716e-16	-1.06747	down
MruG004758		8.86657	8.32073	9.07381	4.58849	3.28455	3.42806	1.41039e-11	-1.12743	down
MruG007210		179.501	177.991	174.239	354.417	353.124	353.911	7.40675e-96	1.04214	up
MruG003903		6.57328	6.57869	19.2389	50.5919	64.3012	30.2041	0.00107567	1.54251	up
MruG049601		4.85585	1.83288	0.728219	0.530117	0.471876	0.35937	0.00579916	-1.4128	down
MruG041476		1.15479	2.29828	1.47895	0.687869	0.931977	0.361869	0.00415061	-1.07205	down
MruG041473		6.68764	5.67059	8.3847	26.8302	27.8855	33.0067	7.72538e-30	2.04345	up
MruG000290		0.374175	0.245396	0.140702	4.07714	3.70026	3.47813	4.26588e-40	3.55491	up
MruG006625		0.564588	0	0.593784	5.80619	5.43135	5.63279	2.23679e-12	2.85039	up
MruG039190		1.29415	1.50353	1.25717	3.74813	2.83748	2.44116	3.50967e-07	1.13769	up
MruG049126		1.62355	4.04979	1.68908	6.34532	7.75807	10.194	0.000139719	1.44969	up
MruG018890		2.85754	2.4278	3.05149	7.76347	7.38005	6.03193	2.52878e-15	1.34426	up
MruG006995		2.09951	2.58517	1.20768	0.744435	0.59973	0.647513	0.000189313	-1.29095	down
MruG023910		1.27383	1.70318	1.99621	5.55519	8.28358	7.48007	3.1195e-10	1.89551	up
MruG027165		237.362	248.337	259.549	52.562	65.5297	61.1443	2.53888e-96	-1.98903	down
MruG018896		1.49234	0.812379	1.27886	6.11051	4.90529	4.50694	2.60047e-13	1.96152	up
MruG035751		1.85408	2.11231	2.21524	4.83043	4.84315	6.1667	1.16525e-09	1.32665	up
MruG034809		4.26057	3.92647	4.95555	1.27052	1.12871	0.772027	9.49012e-15	-1.8606	down
MruG027526		0.775249	0.942554	0.911024	0	0.089826	0	5.91149e-09	-2.76264	down
MruG000421		1.4782	1.80813	1.76737	6.01069	5.62549	6.61177	3.26682e-18	1.79713	up
MruG024872		3.81733	5.10652	5.26331	14.9759	12.2969	9.56161	4.43526e-07	1.30638	up
MruG035036		5.93984	6.23744	5.72511	1.93435	1.43517	2.13931	1.49876e-13	-1.56766	down
MruG035034		10.7372	12.7041	11.2469	44.6681	42.1939	47.5681	8.21177e-65	1.96909	up
MruG035035		5.57329	4.00675	5.10577	15.7229	15.7628	15.9462	6.69524e-21	1.67082	up
MruG024125		2.35006	1.85658	2.36618	0.705546	0.831541	0.526828	1.98276e-06	-1.44022	down
MruG008593		7.77836	7.28026	9.4053	1.85361	4.11846	2.7476	3.34028e-07	-1.33655	down
MruG018615		7.46069	9.36926	9.07301	0	0	0	3.27668e-56	-6.12746	down
MruG029363		1.79934	1.17854	1.06908	12.1655	9.19404	7.92491	4.16748e-33	2.71877	up
MruG037526		13.2385	12.4301	13.3958	5.41686	5.38427	6.03177	5.38743e-08	-1.1122	down
MruG050262		13.27	11.6552	12.5718	25.7715	26.0878	25.2243	2.57122e-27	1.0754	up
MruG014085		16.4161	18.3061	15.0927	33.8422	28.6593	36.3865	2.22661e-10	1.00831	up
MruG041904		82.4488	89.7739	89.0821	20.4006	21.1376	19.7594	2.36147e-167	-2.03214	down
MruG029993		1.31591	1.06075	1.06883	0.411653	0	0.121726	0.000740855	-1.65148	down
MruG029668		1.01687	0.722219	1.57377	8.12487	6.78519	7.10918	1.2704e-08	2.19239	up
MruG015369		81.9642	85.8908	86.0551	11.3927	11.4869	10.2777	0	-2.87281	down
MruG007800		20.4813	17.944	16.5902	0.087017	0.230255	0.098111	4.00417e-124	-6.2827	down
MruG049822		5.75268	4.93727	5.68335	1.76847	1.92609	1.68619	2.0109e-07	-1.42666	down
MruG006044		32.3678	29.1525	29.6555	55.7603	60.9185	67.8167	1.40531e-27	1.05347	up
MruG043416		15.6304	13.8165	14.8824	28.7328	32.6896	33.3823	3.01052e-29	1.1309	up
MruG030359		1.27839	1.10378	1.24205	3.13031	2.98951	3.50601	7.93835e-13	1.39188	up
MruG030352		0.562829	0.721293	0.807193	2.69007	3.01477	2.63282	5.83647e-08	1.76766	up
MruG011989		52.256	20.2085	53.5859	10.9249	8.65265	20.0985	0.00927849	-1.20094	down
MruG046691		0.257622	0.224619	0.417618	1.60276	1.12885	0.994037	3.41783e-05	1.65127	up
MruG046693		21.9473	19.9303	19.9281	8.3186	11.105	8.22799	1.13285e-11	-1.08456	down
MruG034276		1.44301	0.697619	0.637639	3.54097	2.33648	3.02808	1.57258e-05	1.47562	up
MruG006811		0.515824	0.238108	0.262409	1.42717	1.67901	1.94609	0.000129218	1.70833	up
MruG025509		2.9245	2.53139	1.44964	5.17241	7.17127	4.89049	0.000448587	1.19021	up
MruG025508		4.37097	5.04976	4.19436	31.3135	25.5788	26.9331	2.6691e-159	2.63968	up
MruG035657		3.14841	3.03777	3.08768	9.66436	9.31788	9.45258	8.48366e-08	1.51314	up
MruG030221		0	0.054472	0.086994	0.479182	0.262365	0.276712	0.00028604	1.76593	up
MruG036109		3.94734	3.51568	2.79026	8.27137	6.99572	6.35594	1.85272e-09	1.08771	up
MruG026083		434.075	442.808	436.607	0.68507	0.168529	0.241652	2.22801e-102	-7.89783	down
MruG050064		3.14046	2.13546	2.31811	0.400515	0.449807	0.465265	5.542e-08	-2.02514	down
MruG050114		5.94069	5.36546	6.36169	3.43713	1.78037	1.70225	2.29872e-06	-1.20206	down
MruG028731		0.971673	0.667548	0.637634	4.03334	2.30113	3.61173	1.99277e-09	1.89934	up
MruG005674		1.66882	2.30232	1.01967	4.29022	4.33162	3.75285	0.00164141	1.1482	up
MruG031972		3.9727	6.44812	5.28579	0	0	0	2.42873e-32	-5.00152	down
MruG025597		46.3216	50.8991	44.5233	95.1735	91.2631	96.3498	4.11512e-53	1.03906	up
MruG028477		0.444569	0.698551	0.675486	1.91388	1.82449	1.36841	0.000181018	1.30927	up
MruG028470		0	0	0	11.1944	6.0069	8.53783	1.59646e-13	3.47573	up
MruG039569		2.88357	2.17745	3.35197	8.49274	7.72797	10.3194	2.0969e-15	1.61886	up
MruG000165		353.192	374.986	356.558	860.794	785.779	823.21	9.15099e-138	1.23095	up
MruG006021		2.99374	3.30369	2.51965	0.524035	0.884852	0.735482	6.70618e-12	-1.83429	down
MruG046867		5.8372	6.65883	5.90597	0.553554	2.82404	3.40642	0.00389269	-1.14843	down
MruG040011		2.18155	2.19759	2.07299	0.907394	0.62869	0.658551	4.06299e-09	-1.39813	down
MruG041760		3.81899	3.13761	3.00299	1.17742	0.722507	1.00279	8.65896e-12	-1.60864	down
MruG027808		1.11185	0.930679	1.4713	3.0775	2.92345	2.91513	1.52855e-09	1.30993	up
MruG027806		64.2784	64.8588	64.4285	24.9634	30.5829	32.4391	9.65516e-19	-1.07401	down
MruG027807		2.33428	2.53564	2.43149	0.134396	0.16781	0.27309	1.34391e-12	-2.77434	down
MruG046087		4.27114	2.36906	4.40503	12.1231	11.5585	9.24063	7.14275e-09	1.49177	up
MruG046089		49.6064	50.6285	48.2766	13.5008	12.8054	13.7799	1.83342e-117	-1.82782	down
MruG046088		0.115574	0.135605	0.124361	0.715997	0.597629	0.601519	5.76912e-08	1.95648	up
MruG039609		0.16458	0.117942	0.081155	0.743122	0.416402	0.433534	4.30104e-05	1.69337	up
MruG049228		0.757697	1.07019	0.461407	3.74193	2.58904	2.55122	1.48174e-08	1.77643	up
MruG047352		1.72497	1.17283	0.649023	5.23859	6.66239	11.6775	3.72262e-06	1.99125	up
MruG047353		33.1811	38.4533	30.5968	77.1097	67.0453	74.1009	1.0884e-14	1.11493	up
MruG031439		4.48628	3.88236	5.50734	1.35928	0.586838	0.783187	7.51086e-10	-1.97894	down
MruG037179		3.81819	3.9945	3.76714	17.6575	17.6069	18.4808	5.82459e-77	2.22372	up
MruG026301		11.8716	11.4985	10.5101	27.7534	27.7867	27.5482	8.32946e-47	1.32844	up
MruG026321		5.23957	4.17068	3.78658	16.3741	14.9244	13.3614	1.05364e-26	1.75184	up
MruG020440		0	0.137308	0	2.1581	3.23286	1.65435	1.55023e-10	3.00582	up
MruG027495		13.3868	12.6173	12.1585	0	0	0	6.78278e-31	-4.89644	down
MruG027145		20.839	21.886	22.0479	11.2853	8.87612	10.4857	6.30093e-22	-1.01777	down
MruG028672		25.8003	23.2089	27.2792	6.43899	7.57646	6.72318	2.78007e-42	-1.79923	down
MruG029232		1.44236	0.515048	0.843876	3.76745	2.85219	3.42403	5.82198e-05	1.53441	up
MruG012513		5.7423	4.79953	4.43738	1.78165	1.3697	1.53266	3.38923e-14	-1.54283	down
MruG014207		7.08115	7.38549	6.8529	2.81236	2.60092	2.20339	1.70211e-38	-1.41609	down
MruG014200		7.23022	7.63361	8.64669	13.2162	17.9927	15.686	2.60233e-10	1.01267	up
MruG014209		2.80004	2.67598	2.33109	0.686556	0.546957	0.726086	2.37255e-06	-1.65559	down
MruG010914		25.4403	23.796	21.8398	0	0	0	3.4652e-47	-5.74092	down
MruG010917		11.47	8.82523	8.57143	2.93601	2.73844	2.91735	6.59415e-16	-1.62027	down
MruG011354		58.769	52.3487	54.343	10.9987	8.68074	11.4632	3.55058e-72	-2.31325	down
MruG023067		93.3458	75.1648	77.764	11.9711	15.3095	13.6498	1.30835e-57	-2.47265	down
MruG013266		2.79092	4.10681	2.13463	8.29966	5.76739	8.0978	0.00121475	1.15122	up
MruG015631		12.7826	14.1954	15.668	4.39377	3.39938	3.13695	2.00799e-42	-1.87313	down
MruG015985		3.68163	3.13203	3.96668	1.03628	1.2148	0.905045	1.88293e-10	-1.60254	down
MruG015981		6.70001	5.9113	4.19533	2.37679	1.56076	2.00604	9.65919e-08	-1.33603	down
MruG005000		7.6896	5.96456	5.93556	3.68203	2.14312	2.75863	3.69395e-08	-1.08872	down
MruG014582		22.2379	21.315	26.1541	1.64623	1.38992	2.46749	4.10719e-65	-3.43276	down
MruG014581		2.21187	2.6758	2.88476	0.618381	0.86078	0.872623	4.59196e-10	-1.56765	down
MruG028653		4.91684	4.32385	3.94429	11.6875	12.9296	12.7618	7.603e-22	1.50468	up
MruG024303		10.5371	10.7355	10.7766	1.53209	2.225	1.51571	5.52287e-46	-2.474	down
MruG030722		1.03412	0.908927	0.623325	2.50412	1.85305	1.84144	9.51051e-05	1.19247	up
MruG038532		37.8698	31.1928	37.0802	0	0	0	1.20316e-123	-8.14437	down
MruG041212		2.96263	2.34618	2.40217	0.812299	0.761418	0.810561	5.67791e-09	-1.51384	down
MruG038536		7.01687	6.89568	6.34241	15.4257	15.8561	17.3923	2.18936e-25	1.2894	up
MruG038393		4.57638	4.57154	5.10124	10.5827	10.6226	11.531	5.96249e-23	1.22349	up
MruG027167		70.6208	72.5807	72.2474	176.362	173.008	176.407	4.553e-136	1.33028	up
MruG049409		3.80485	1.91791	2.30088	6.01828	6.76105	5.16162	9.51358e-05	1.09892	up
MruG049405		63.666	63.5192	66.501	3.09545	3.87094	5.05713	3.19538e-137	-3.86417	down
MruG049403		49.9106	53.1683	48.9912	155.078	147.559	159.298	2.86436e-56	1.62935	up
MruG001067		5.10605	5.47855	5.2717	16.001	16.4799	15.236	8.3607e-41	1.60892	up
MruG001064		5.19979	4.5984	4.79903	9.69426	11.5889	11.9554	5.37875e-16	1.20271	up
MruG001069		3.72184	3.44374	3.98484	10.3992	12.0767	11.5154	1.48713e-27	1.61176	up
MruG045188		3.52804	3.72274	3.90817	1.37486	1.43503	1.4447	2.60499e-14	-1.30332	down
MruG031258		6.61291	6.23275	7.18601	1.87673	1.73935	2.76878	5.07165e-12	-1.51893	down
MruG046768		0.261793	0.801345	0.319491	1.07523	1.57738	2.91001	0.000110653	1.5966	up
MruG005702		1.07394	1.23978	1.30159	0.440327	0.449397	0.173564	0.000566563	-1.37051	down
MruG048224		1.82968	2.08537	1.8785	4.40688	6.45992	9.87453	3.78613e-05	1.54667	up
MruG043116		2.49325	1.89019	1.82373	0.093104	0	0.044455	6.50195e-34	-4.27161	down
MruG025790		4.73547	4.77379	4.19452	1.71642	1.5027	1.827	8.42487e-10	-1.31727	down
MruG033498		5.92984	5.47403	7.62806	0.107614	0	0	4.01062e-38	-5.01234	down
MruG039936		1.29522	1.7905	1.26527	20.6758	19.9936	19.3776	1.04645e-140	3.73427	up
MruG011968		13.5562	11.5975	11.3423	22.3771	32.0028	28.8391	1.92915e-08	1.17692	up
MruG042451		2.38364	1.44201	0.879897	0.214326	0.452399	0.285168	0.000120914	-1.6686	down
MruG008658		14.789	12.7298	11.6979	23.8287	25.5678	29.716	3.71206e-10	1.02769	up
MruG008659		32.212	28.5019	31.9632	60.1976	59.7732	63.9907	6.96685e-22	1.02147	up
MruG008650		3.5087	2.49824	3.02017	8.38494	8.03232	9.41734	3.01832e-08	1.43619	up
MruG008655		15.3888	8.39862	11.0938	4.41226	6.6246	4.45321	0.000195487	-1.0331	down
MruG014011		2.22959	1.87953	1.73277	15.6109	19.8131	22.9248	3.45195e-65	3.22192	up
MruG014010		3.25773	4.82354	4.15529	9.80955	9.53848	11.6895	1.961e-15	1.34376	up
MruG044856		0.454283	0.837322	1.06909	2.41833	2.52819	2.45419	0.0034388	1.27564	up
MruG043499		2.76527	2.45065	3.11039	0.986184	1.3138	1.24693	6.88193e-06	-1.10793	down
MruG007312		29.4828	24.4151	31.3586	5.82702	5.1404	5.49196	7.83718e-68	-2.27949	down
MruG004561		3.35233	5.68725	4.65296	0.161514	0	0	2.95424e-23	-4.10152	down
MruG007094		2.93763	2.88481	3.08972	1.08083	0.771405	0.533954	3.05528e-08	-1.64869	down
MruG024324		1.24794	1.85028	1.33623	0.284797	0.397858	0.240955	1.68363e-05	-1.74527	down
MruG006542		1.2966	1.77833	1.57167	0.377782	0.708559	0.507688	0.00518178	-1.17931	down
MruG039098		7.63993	7.28213	7.51516	44.2994	49.6184	57.4296	2.06224e-75	2.72468	up
MruG025589		3.84145	3.29325	3.78868	18.8252	18.2712	21.3185	1.23467e-59	2.39462	up
MruG025588		7.66382	8.75543	8.06277	2.70466	1.74727	3.41307	6.27767e-09	-1.47014	down
MruG030117		3.68313	4.05951	4.45903	0.280038	0.442391	0.417226	3.31181e-59	-3.23002	down
MruG030118		3.75909	2.62425	2.7356	0.225888	0.196032	0.745738	2.06131e-11	-2.4199	down
MruG012631		21.7901	19.3847	19.0612	51.4509	38.6963	36.5812	4.86321e-26	1.10555	up
MruG022055		2.63699	4.08254	4.58699	0.843295	0.300091	0.680489	1.61879e-07	-2.04317	down
MruG036456		5.36116	5.8059	5.35365	2.35439	1.77023	2.8219	1.34478e-06	-1.12699	down
MruG036459		0.299155	1.29578	1.17642	1.93664	2.52394	2.36523	0.00374981	1.11378	up
MruG036458		3.15729	3.51656	4.58026	0.533791	0.337871	0.462743	3.35357e-11	-2.44529	down
MruG034960		1.90594	2.47615	2.60385	0.450333	0.31195	0.258089	7.28839e-11	-2.2526	down
MruG046950		3.61363	3.78026	4.49948	1.62872	1.27676	1.30598	3.34974e-06	-1.31497	down
MruG046957		3.49627	1.48666	1.68229	0.622388	0.622453	0.447028	5.82207e-07	-1.66536	down
MruG040154		11.3832	11.0611	8.48651	2.98092	4.32506	3.9323	1.37757e-08	-1.32899	down
MruG020345		4.42918	4.89332	5.22687	14.6841	15.1537	17.7508	5.17082e-11	1.61768	up
MruG030935		0.725556	0.690612	0.519271	0.209797	0.27543	0.066123	0.00548224	-1.28382	down
MruG034245		0.46992	0.680158	0.547595	5.77299	5.2877	4.48421	4.81964e-33	2.98709	up
MruG010541		2.84214	1.57456	1.37229	8.7832	4.25932	6.01572	0.00016096	1.44584	up
MruG018715		3.4313	4.2603	3.03627	11.7024	9.11356	9.50555	1.97893e-07	1.41102	up
MruG012883		3.23572	2.71929	2.89548	0.814255	0.714113	0.724425	8.417e-10	-1.73911	down
MruG031548		1.54738	0.985989	1.99675	5.12719	5.68577	4.65	3.79453e-05	1.51088	up
MruG023554		6.34197	5.93092	5.1544	2.37155	2.31066	1.90433	2.53074e-14	-1.30831	down
MruG019278		1.55136	0.662021	1.12842	4.51572	3.41546	3.47159	0.00240653	1.34998	up
MruG029704		3.89018	3.62057	4.41355	1.34004	0.944376	0.658042	1.66392e-09	-1.75689	down
MruG004343		9.89051	12.9786	9.15429	29.539	27.1478	26.8286	1.30329e-19	1.39309	up
MruG007925		0.965982	0.508936	0.689696	1.65321	1.66324	1.37608	0.00131827	1.0303	up
MruG042641		2.69292	3.00339	3.90641	0.509583	0.198703	0.353096	1.07954e-18	-2.71734	down
MruG038839		1.22613	2.39984	1.6102	0.601048	0.901673	0.585772	0.00794353	-1.05061	down
MruG005437		4.15154	5.56352	5.21083	1.18712	2.02008	1.48684	2.41105e-06	-1.44448	down
MruG009198		2.52768	2.06918	1.75457	0.595376	0.757841	0.704436	4.13638e-08	-1.4564	down
MruG043512		2.47135	2.00076	2.02908	0.640648	0.839986	1.04109	1.72872e-05	-1.21113	down
MruG040097		0.422433	0.440015	0.514074	1.4468	0.911141	1.04493	0.00327893	1.12357	up
MruG007102		0.123352	0.293303	0.471583	1.79529	1.17351	1.2624	0.000395302	1.63131	up
MruG024288		36.153	37.4072	34.2704	2.72204	4.30265	3.53527	8.36635e-84	-3.21358	down
MruG024287		35.2783	34.668	33.4406	3.91334	3.08391	3.55905	3.71377e-128	-3.16636	down
MruG024286		52.7777	51.5311	50.0126	9.12711	10.3438	8.42385	6.87687e-145	-2.39698	down
MruG024284		15.4102	17.5782	21.0375	0	0.32406	0.494176	2.99183e-32	-4.50309	down
MruG024283		30.9484	27.1782	34.1092	0.204765	0.182942	0.508211	6.1731e-57	-5.31458	down
MruG024282		35.0312	30.7682	32.511	3.31537	2.81765	3.03892	9.61513e-186	-3.31676	down
MruG046553		140.711	127.465	140.205	53.4249	41.906	44.5078	7.29687e-56	-1.48177	down
MruG047602		1.30083	1.09061	1.5585	5.38182	4.23557	1.23751	0.00160361	1.23398	up
MruG034339		23.7284	26.1966	24.4013	3.17581	3.02379	6.13237	4.12244e-26	-2.38776	down
MruG007485		0.31647	0.451062	0.512193	1.47577	1.61474	2.47583	1.92149e-05	1.69578	up
MruG036222		3.71314	2.90582	3.65313	0.549535	0.50792	0.522579	2.83251e-14	-2.34416	down
MruG013216		1.48796	1.29161	1.23785	0.490104	0.186411	0.458028	4.4646e-09	-1.61243	down
MruG044341		1.15797	1.24374	1.26796	0.048221	0	0	4.00671e-26	-4.20755	down
MruG016845		2.75635	2.37817	2.35977	0.711609	0.856917	0.927358	9.90211e-05	-1.32847	down
MruG001812		10.9771	12.8724	7.91923	34.624	36.4153	36.8791	2.6526e-37	1.77389	up
MruG050147		2.24054	2.13739	2.39895	0.755479	0.549456	1.24785	0.000183459	-1.20034	down
MruG049934		41.6085	47.4965	43.0668	12.2674	11.5072	14.3698	3.45581e-39	-1.71172	down
MruG049933		20.3644	12.9614	20.0466	4.46071	4.38468	4.92567	2.23384e-12	-1.76863	down
MruG004820		10.8333	10.0845	8.73667	1.45147	1.55998	1.69301	2.87313e-41	-2.49884	down
MruG023711		473.165	482.902	469.119	185.433	168.548	179.193	1.05397e-182	-1.36757	down
MruG027415		12.3676	13.3233	12.6968	47.9877	59.1468	71.8997	5.74424e-40	2.1954	up
MruG044879		0.662461	0.625354	0.531922	1.33357	1.54287	1.02884	0.000230173	1.04555	up
MruG013770		1.40525	1.16647	0.523314	3.09752	2.78689	2.11773	0.000392997	1.22126	up
MruG008289		2.41262	2.31228	2.66455	0.032775	0	0	2.64069e-25	-4.39787	down
MruG012827		5.74434	2.98705	3.75043	0.441704	0.051716	0.09019	3.72384e-10	-2.77568	down
MruG010084		0.742973	0.606119	0.937614	2.40223	2.30045	2.54079	8.35257e-10	1.57359	up
MruG049612		0.532668	0.366036	0.708035	2.44984	2.89131	2.21279	2.33691e-11	2.01034	up
MruG003364		1.34057	1.31686	1.6346	0.293756	0.127081	0.252658	4.70076e-08	-2.08897	down
MruG000040		8.89268	11.284	12.2276	32.3484	31.6446	30.4547	1.79549e-37	1.56227	up
MruG028912		17.7197	18.2121	17.8833	60.1916	56.2987	62.1235	1.57027e-96	1.76362	up
MruG048317		3.55527	4.38107	2.9617	0.973377	1.87491	1.22399	0.0019821	-1.15975	down
MruG045265		7.56913	6.78968	7.01328	1.17548	1.35527	1.19599	1.6309e-23	-2.31136	down
MruG017186		1.70168	1.58349	1.64985	0.065625	0.098005	0.054715	1.04521e-08	-2.65685	down
MruG045100		22.779	30.3111	32.1082	142.983	140.217	140.01	1.58482e-77	2.31468	up
MruG041481		730.864	742.331	747.175	41.1115	39.7565	42.107	0	-4.10871	down
MruG007736		2.31732	2.17948	1.81634	5.98866	5.2457	6.17799	0.0001579	1.29714	up
MruG003601		14.0668	15.2208	14.3158	2.64279	3.25858	2.84584	3.18511e-56	-2.22089	down
MruG017457		6.45631	6.70594	8.35797	1.3308	1.158	2.8632	1.70092e-06	-1.67812	down
MruG018076		15.3645	19.4174	16.4339	39.0389	34.5534	38.4383	2.38463e-24	1.16071	up
MruG031772		0.064386	0.073055	0.071022	1.06346	0.829067	0.707798	1.23053e-07	2.36971	up
MruG022743		4.92861	4.13485	5.86518	0	0	0	5.21578e-38	-5.30972	down
MruG032236		26.7299	36.1654	34.4827	7.3579	11.2749	5.82921	4.93599e-20	-1.85321	down
MruG034690		25.4898	24.1319	25.8046	45.5829	51.6093	56.7644	6.18143e-19	1.05878	up
MruG037344		6.78258	8.118	6.77258	0.741063	2.14104	2.05658	0.000796527	-1.50287	down
MruG037342		2.48726	5.01755	3.67117	1.09356	1.48817	1.46656	0.000243337	-1.23755	down
MruG026240		29.5195	32.9163	31.104	99.6565	90.5977	91.2976	1.19375e-115	1.62784	up
MruG026243		3.78739	3.46266	3.58301	31.2466	31.2376	28.6161	6.40264e-184	3.07653	up
MruG026244		0.401056	0.447755	0.455631	1.79031	1.85207	2.25927	6.08691e-11	1.95857	up
MruG026246		2.42657	2.3116	2.59512	18.317	19.6443	18.2378	7.23421e-117	2.9261	up
MruG035272		1.6644	2.05748	1.86004	5.26055	5.09371	5.09374	3.69468e-07	1.3799	up
MruG048482		2.37669	2.53515	3.74851	5.59341	6.00337	7.35012	2.51573e-07	1.1115	up
MruG048481		0.410015	0.268612	0.349896	1.13388	1.1263	1.40493	7.68103e-05	1.52738	up
MruG023904		9.72421	7.37769	7.69709	2.79492	4.3489	3.00963	1.13549e-05	-1.15118	down
MruG028022		2.45736	2.72203	2.14219	0.092667	0.088711	0.243572	3.83469e-12	-2.91554	down
MruG021509		6.41161	6.1812	7.86976	1.55861	2.4251	2.37436	3.85054e-10	-1.53828	down
MruG021504		7.80507	5.06025	8.45376	16.0805	13.3238	16.5502	5.95746e-05	1.06623	up
MruG021503		4.75986	3.25819	3.67554	9.03266	12.4835	14.7892	1.27478e-06	1.49156	up
MruG012250		4.2935	5.60624	5.81697	14.6183	17.1091	12.4341	8.18004e-15	1.47396	up
MruG012253		0.40011	0.237663	0.566372	3.1608	4.17331	4.33274	5.1889e-23	2.9103	up
MruG012788		17.9329	16.1136	15.7966	46.0949	47.4481	53.0482	1.47913e-25	1.56252	up
MruG010789		0.659513	0.878911	0.834162	0.249321	0.292962	0.252772	0.0036356	-1.20596	down
MruG039802		1.3745	2.30361	1.58283	0.366023	1.16589	0.532241	0.00470157	-1.08547	down
MruG016206		0.310357	1.11279	0.763835	1.75574	2.10151	2.30714	0.00211284	1.24284	up
MruG010120		1.74279	1.29554	1.51428	4.99706	7.0332	5.67701	1.01321e-11	1.83286	up
MruG010127		7.88216	7.15842	5.50069	1.16824	1.17308	1.24969	3.90826e-23	-2.30902	down
MruG018945		6.14228	6.65924	5.43079	17.4478	16.0026	14.7434	6.81922e-36	1.4297	up
MruG039766		31.6619	35.0916	31.377	7.98072	8.35341	8.19145	9.79306e-71	-1.92671	down
MruG003192		1.34156	0.81448	1.877	3.18097	3.78242	3.818	0.000773841	1.22497	up
MruG022508		20.2128	19.737	18.5888	65.9936	46.9059	44.9116	2.94542e-36	1.45448	up
MruG049569		0.313526	0.400773	0.308832	1.35688	1.43479	1.36018	0.000812046	1.47883	up
MruG021204		602.545	580.668	597.441	131.474	126.751	134.385	0	-2.12789	down
MruG021305		35.5536	36.5637	36.3155	13.7321	15.977	15.6436	1.41574e-24	-1.19453	down
MruG027024		2.2901	2.50224	3.40103	7.22409	5.93324	7.60434	1.44222e-08	1.30095	up
MruG002454		1.31486	1.47637	1.5439	4.54851	4.30157	2.57763	0.000137655	1.26694	up
MruG023411		3.28179	3.15584	3.38424	1.24825	0.872202	0.929432	1.24302e-32	-1.60097	down
MruG046644		6.6427	7.34905	9.49874	17.3148	17.2182	18.5483	2.90801e-18	1.19618	up
MruG031825		0	0.022021	0	1.30622	1.31502	1.80322	7.99419e-20	4.0327	up
MruG031820		6.66066	6.06165	6.0433	12.6196	13.0548	17.9149	1.77795e-15	1.22803	up
MruG035841		2.52383	2.35664	1.75993	0.077885	0	0.153829	6.13226e-20	-3.58009	down
MruG014934		1.5833	1.64464	1.23594	0.590357	0.733224	0.245772	0.00156105	-1.20243	down
MruG028530		0.97936	0.754434	0.678479	2.59636	4.40576	2.99672	1.88137e-10	1.8893	up
MruG024111		3.46643	3.09338	4.94418	1.91615	1.69095	1.61448	2.5939e-06	-1.03635	down
MruG033879		1.15008	1.53123	1.79173	0.406422	0.117306	0.263634	9.85077e-05	-1.74419	down
MruG018903		279.07	272.154	276.039	94.3784	83.6294	90.8565	2.16514e-193	-1.5692	down
MruG018900		0.357196	0.396764	0.283369	6.61173	4.08096	3.63397	1.40289e-20	3.18958	up
MruG029128		0.172664	0.314805	0.181104	1.22479	0.863749	0.653775	4.87153e-07	1.76702	up
MruG019745		0.024597	0.252226	0.491115	1.07755	1.39237	1.11454	0.00195429	1.48931	up
MruG001345		2.86661	3.19695	2.835	6.69974	5.6928	5.93885	2.64179e-12	1.06351	up
MruG003874		9.47168	5.53603	6.03786	2.41256	3.30069	3.47281	0.000370621	-1.0438	down
MruG009805		0.127848	0.170153	0.467075	1.04762	0.932742	1.09595	0.0027819	1.41496	up
MruG039357		1.68133	1.55063	1.67065	0.840107	0.403484	0.475745	0.00610293	-1.15767	down
MruG030657		6.27266	4.7888	5.8724	2.6043	2.60323	1.91498	1.00876e-10	-1.15749	down
MruG030659		9.88868	8.55046	8.36442	3.28153	2.92455	2.88469	9.84249e-29	-1.47846	down
MruG042050		47.3557	46.8136	43.576	89.9086	90.8689	99.5854	3.48473e-56	1.06792	up
MruG000780		7.82331	7.15484	8.10576	18.9888	21.3377	16.0806	1.13002e-11	1.28158	up
MruG022319		5.98694	6.05452	7.11395	1.84851	2.01122	1.76349	1.00193e-12	-1.61519	down
MruG004456		0.836766	1.21936	0.957128	0.150991	0.177145	0.086141	1.44741e-05	-1.93883	down
MruG035040		2.255	1.82441	2.00371	0.284325	0.496391	0.058777	1.01347e-08	-2.24447	down
MruG042662		12.6681	12.5316	12.5353	3.97023	5.83488	4.32777	3.44812e-16	-1.33201	down
MruG020269		29.9459	27.9667	26.6061	4.76434	7.7796	7.99744	1.86248e-14	-1.86779	down
MruG020267		0.414128	0.380648	0.332865	1.44523	1.07624	1.18532	8.87412e-06	1.51549	up
MruG020266		0.281707	0.222714	0.202444	1.24469	0.834909	0.754748	0.000272883	1.54033	up
MruG024942		11.66	9.64396	11.4327	41.1749	47.751	47.2148	2.53237e-74	2.07098	up
MruG010373		0.546729	0.673467	0.323463	2.97247	2.45545	2.86836	7.80508e-09	2.04271	up
MruG010376		1.90236	1.56585	2.30901	0.719704	0.568685	0.794945	0.000211116	-1.24275	down
MruG018588		2.44961	2.23371	2.32653	11.0681	10.0083	11.9277	3.56193e-10	1.974	up
MruG045563		23.0062	24.8735	23.5862	5.1166	5.90476	5.63559	1.16095e-52	-2.01503	down
MruG045672		6.25438	4.25516	5.26429	19.9424	43.571	42.3791	2.7432e-18	2.50396	up
MruG048487		0.427549	0.710871	0.195584	1.3717	2.13129	1.28862	0.000144059	1.52389	up
MruG048486		0.57748	0.411378	0.326005	2.05964	2.53797	1.2882	9.29284e-06	1.74126	up
MruG005327		8.91471	7.75375	8.03414	4.3729	3.4003	3.66961	9.20682e-10	-1.02584	down
MruG032748		18.8418	20.1113	20.0425	52.8133	56.6783	57.0819	1.12816e-78	1.53284	up
MruG011541		4.11212	2.36362	5.5572	11.2913	12.462	5.64484	0.000309962	1.18115	up
MruG037369		0.547683	0.427528	0.301672	0.131435	0.037437	0.05942	9.91211e-07	-1.92044	down
MruG043652		25.3574	27.0236	23.1204	4.04728	3.71862	2.4709	3.49671e-84	-2.76374	down
MruG014701		5.48437	7.07795	6.41209	12.655	14.3657	14.2755	4.50453e-06	1.08842	up
MruG007222		0.955941	0.976191	0.544862	0.420962	0.219866	0.319918	0.00454426	-1.08238	down
MruG014335		1.37735	1.47849	1.24354	3.50403	3.58485	4.19734	8.88157e-10	1.40677	up
MruG003937		11.2197	17.1723	13.9234	4.54104	4.38009	4.1113	3.10888e-15	-1.57619	down
MruG003935		0.470625	0.282881	0.394239	2.31643	2.99226	2.97799	1.28208e-23	2.63353	up
MruG003938		7.50095	7.73877	7.14836	3.1658	2.05077	3.41896	8.98351e-10	-1.26242	down
MruG003939		12.1254	11.4395	12.3627	0.206611	0	0.212003	3.02429e-84	-5.48378	down
MruG003689		2.24466	1.98249	2.04728	0.470549	0.429413	0.652061	3.07879e-10	-1.77693	down
MruG041406		1.14362	0.893275	0.339416	4.44419	2.70268	2.26976	9.5585e-07	1.72872	up
MruG049387		283.239	277.856	266.871	1214.23	1098.8	1123.34	0	2.09483	up
MruG039250		1.15714	1.26998	1.67375	0.062817	0.14279	0.219172	7.16533e-09	-2.41134	down
MruG039257		1.73889	0.919983	0.786054	21.7918	36.9164	33.3349	1.07511e-43	4.15046	up
MruG039258		3.35973	1.18797	2.69585	18.5842	21.7391	22.7541	2.56334e-34	2.93983	up
MruG039259		4.62624	3.80078	4.38428	33.6961	27.4439	34.0264	8.11667e-123	2.88606	up
MruG000243		2.37681	2.03251	2.47765	0.393543	0.364415	0.340319	1.68135e-15	-2.31122	down
MruG000242		2.15244	3.01665	2.19911	0.568185	0.424776	0.737251	1.07544e-08	-1.7783	down
MruG017585		0.819285	0.776726	0.677728	3.74996	4.13209	5.02132	5.83707e-13	2.23642	up
MruG019679		14.4776	16.656	14.7138	1.82841	1.69065	2.56748	3.32418e-32	-2.68291	down
MruG047769		3.73916	3.69309	3.63379	60.6399	49.5299	51.7451	9.9254e-183	3.8341	up
MruG047762		1.40613	0.976084	0.647157	4.96825	8.40025	8.98929	1.26581e-10	2.39067	up
MruG047761		0.99497	0.721642	0.698332	7.31299	8.14409	9.98762	2.18246e-16	2.84528	up
MruG047764		0.472851	0.498208	1.36952	6.28289	5.61315	8.24233	1.74466e-10	2.45128	up
MruG038619		0.775375	0.903108	0.524342	17.5768	15.3819	14.7906	5.24475e-75	4.16107	up
MruG030022		12.3108	12.6586	11.7171	34.9875	33.3562	23.1613	7.67331e-15	1.32201	up
MruG033648		2.12261	2.61716	2.22408	4.90059	5.7066	5.32137	2.47927e-05	1.13652	up
MruG022129		0.684705	0.411259	0.54719	0	0	0	1.57447e-13	-3.48437	down
MruG033405		6.11597	5.76351	5.28759	2.09651	1.50502	1.58632	5.64513e-32	-1.63452	down
MruG030643		0	0	0	2.62577	1.87382	2.18471	3.83683e-30	4.84126	up
MruG021584		1.25287	2.30796	1.25772	5.04043	5.55777	4.5159	3.43043e-08	1.54485	up
MruG018622		2.55196	4.29746	2.83703	16.1102	12.815	10.0778	1.41116e-08	1.80393	up
MruG016281		5.54124	4.19287	5.88161	1.77371	2.09917	1.71355	1.25021e-07	-1.33044	down
MruG018690		2.4641	2.29944	2.83733	7.32196	6.42874	7.41357	1.5863e-16	1.46731	up
MruG034005		17.4359	12.2665	13.2662	31.6483	30.3682	28.6818	2.12889e-10	1.08725	up
MruG012945		3.57556	3.49833	3.08952	0.923177	0.938347	0.553325	2.04507e-22	-1.92994	down
MruG012949		1.26445	1.53314	1.14079	0.610933	0.333938	0.507905	0.00357825	-1.1363	down
MruG005166		2.3719	3.17236	3.02408	0.69004	0.999441	0.689208	5.04845e-09	-1.63846	down
MruG005165		1.68055	2.39805	1.67419	0.526942	0.652649	0.449818	7.02868e-10	-1.62562	down
MruG014625		1.24435	0.676195	1.05934	0	0	0	1.84674e-14	-3.59298	down
MruG044248		7.1798	6.91274	7.44624	18.5594	16.6191	14.8926	2.59786e-27	1.24441	up
MruG013390		0.694102	1.34682	1.07641	0	0	0	2.64062e-15	-3.6861	down
MruG028542		0.850711	0.713449	0.9831	2.58933	1.18743	3.43261	0.000456048	1.29273	up
MruG012111		1.81793	2.52779	3.3776	5.93471	6.57322	5.40898	0.000102127	1.12922	up
MruG045033		2.14751	1.35881	2.73629	8.7679	7.30636	8.007	2.23537e-14	1.84947	up
MruG042488		2.07612	1.61726	1.25258	0.53401	0.732678	0.76662	0.000770104	-1.09196	down
MruG049879		3.54714	3.46917	2.49945	0.967076	0.660213	0.826408	1.54039e-10	-1.73421	down
MruG042733		8.81246	8.63921	8.22206	18.1807	18.423	18.1152	3.55918e-35	1.1289	up
MruG034356		17.031	17.9206	19.1274	4.35088	4.60562	5.74432	2.0283e-30	-1.78311	down
MruG022910		8.40183	9.17882	9.60252	2.07102	1.78079	1.9799	2.17032e-31	-2.08585	down
MruG026914		158.271	170.464	161.412	13.3531	15.1474	17.9176	4.72024e-223	-3.31538	down
MruG027490		6.19906	4.22513	5.04559	1.92	1.57636	2.08621	3.05944e-08	-1.32838	down
MruG027496		9.26166	7.8297	11.8236	0	0	0	2.21745e-39	-5.38697	down
MruG037916		1.68741	1.87195	2.72663	0.990189	0.61887	0.670366	0.00425229	-1.14336	down
MruG045912		0.808543	1.32685	1.11384	0	0	0	5.46437e-16	-3.75335	down
MruG045910		0.671767	0.686521	0.889124	2.28316	1.66912	1.88562	4.1983e-09	1.34313	up
MruG024661		42.3502	42.9657	40.9185	8.73277	6.48728	7.85759	1.60065e-117	-2.3678	down
MruG024663		0.871948	0.744482	0.951972	0.139057	0.374994	0.22988	0.00680827	-1.25005	down
MruG034246		0.428004	0.474056	0.535258	5.28697	5.9509	4.83404	4.45919e-28	3.12099	up
MruG025392		13.1617	13.1511	13.786	28.5498	28.684	29.7741	5.95372e-55	1.15661	up
MruG032376		3.87586	5.20397	4.06879	1.74702	1.54857	1.02641	2.69691e-10	-1.46022	down
MruG034797		13.7409	14.6118	14.614	2.22694	2.68914	2.08122	4.47509e-23	-2.38689	down
MruG006844		1.33532	1.90455	1.37867	0.551528	0.318332	0.680553	5.36142e-05	-1.32578	down
MruG036795		0.400483	0.415741	1.12928	1.93598	2.06417	1.96829	0.000402029	1.35317	up
MruG014698		0.210605	0.139841	0.13036	3.38856	2.86393	4.07161	5.62036e-11	2.90172	up
MruG036130		10.9896	13.1723	12.0711	34.0839	33.733	35.0525	1.11582e-57	1.53658	up
MruG036137		1.66555	1.17499	0.922481	0.104861	0.095211	0.183081	1.34649e-08	-2.38627	down
MruG018988		3.63409	3.84019	5.03302	0.308317	0	0.076929	2.34852e-11	-3.03595	down
MruG018983		8.94098	9.10173	9.27512	3.34464	2.50915	3.4988	3.38207e-14	-1.4337	down
MruG021622		0.334118	0.571912	0.268973	1.39653	0.974452	0.912254	0.0011861	1.25611	up
MruG021620		8.02394	9.44965	8.48261	3.35404	4.32525	4.06794	1.78216e-14	-1.07364	down
MruG014196		4.08197	3.52325	4.55444	1.39935	1.38983	1.37542	2.44489e-10	-1.41232	down
MruG014197		7.34303	6.69236	5.39745	2.90932	2.58929	2.35394	4.29239e-14	-1.21824	down
MruG010867		0.588503	0.424198	0.583192	1.8697	1.21382	1.30881	2.62522e-05	1.32997	up
MruG044574		0.393899	0.269763	0.276345	0.942629	1.43658	0.932623	0.000977306	1.402	up
MruG045405		0.621554	0.49248	0.421677	1.95823	1.14524	1.40204	1.59783e-05	1.41187	up
MruG009736		7.19417	6.98125	7.36082	1.31775	1.09445	0.966611	1.65655e-16	-2.34602	down
MruG029677		2.35745	2.21109	2.09615	0.849537	1.32078	0.846189	0.000197802	-1.01152	down
MruG013567		2.04791	2.00579	1.78331	4.0714	3.96658	3.78394	2.06847e-11	1.03778	up
MruG004931		10.6162	10.3664	8.56694	1.6961	1.69281	0.804984	1.06283e-33	-2.61345	down
MruG013563		1.65677	1.57598	1.84473	0	0	0	1.01587e-11	-3.25779	down
MruG022423		5.01106	4.27528	3.39229	0	0	0	4.18232e-15	-3.65889	down
MruG022422		5.6425	4.00064	6.35762	0	0	0	5.5274e-29	-4.79317	down
MruG007818		0.213907	0.414215	0.23334	0.883784	0.770096	1.02175	0.00594491	1.23779	up
MruG043987		6.59355	4.67259	5.01591	13.5085	11.7312	11.0983	1.9648e-05	1.11064	up
MruG039533		0.996762	1.02144	1.45942	0.504178	0.224397	0.386931	0.00229185	-1.26125	down
MruG039532		0.932625	0.673388	0.887964	2.99411	1.8836	1.30187	0.00146424	1.15387	up
MruG015378		3.21555	3.33372	4.30451	0.407954	0.24963	0.533063	3.40468e-09	-2.38738	down
MruG043363		0.77279	0.756341	1.29372	2.76193	3.433	2.72677	0.00212343	1.2995	up
MruG043362		1.10278	1.11481	0.75874	3.96916	2.40962	2.00065	1.36484e-05	1.36408	up
MruG033749		0.849074	1.20461	0.749445	0.089264	0.010684	0	2.68104e-08	-2.63489	down
MruG031422		15.7902	15.4249	15.1678	1.0072	1.35829	1.93208	1.73321e-43	-3.18782	down
MruG026893		3.18329	2.83126	3.08802	59.2321	49.3321	51.1822	2.62875e-217	4.08493	up
MruG047305		3.17868	1.97577	1.75361	3.97764	6.74232	4.41045	0.000796882	1.0541	up
MruG040045		0.17715	0	0.108132	7.93803	9.2017	7.69219	2.48125e-24	4.11961	up
MruG047895		4.59621	4.32354	4.09293	10.5744	10.7305	13.4414	4.85811e-17	1.41709	up
MruG019103		161.013	168.218	155.183	0.27446	0.205002	0.22613	0	-8.87822	down
MruG024491		29.4096	30.3325	32.7382	11.6949	13.5265	16.0007	3.92551e-15	-1.09741	down
MruG039750		6.54419	5.6551	6.3978	3.23368	2.74457	2.26523	1.71806e-06	-1.06792	down
MruG039756		89.3235	86.4237	97.6644	218.886	219.934	258.126	6.05861e-53	1.3836	up
MruG042188		4.12906	2.72709	3.22772	1.15415	1.16447	1.71652	0.000595898	-1.12075	down
MruG023163		1.15498	0.695225	1.40986	3.08048	3.42145	3.17041	1.69648e-05	1.39912	up
MruG023161		2.04561	1.70891	2.04338	0.657906	0.71128	0.821732	0.0078238	-1.07372	down
MruG016541		1.32067	2.42958	2.16928	4.0238	3.8125	5.11896	0.000516813	1.05947	up
MruG023294		2.82722	3.4064	3.08937	10.2947	8.46892	8.87725	5.45811e-19	1.56051	up
MruG023291		0.454183	0.429214	0.65649	1.57214	1.19824	1.51589	2.80363e-08	1.40389	up
MruG029866		1.75147	1.86403	1.49912	0.394636	0.413981	0.325777	1.50832e-10	-1.89031	down
MruG029868		5.30464	3.37484	4.54469	1.92612	2.18129	1.88288	1.10386e-05	-1.03318	down
MruG015164		4.54867	4.00739	4.14655	14.168	12.1499	13.2586	1.06764e-45	1.66033	up
MruG029243		3.13871	3.32034	2.09786	0.871431	0.764142	1.36745	4.05352e-06	-1.32579	down
MruG005957		8.70518	5.76523	4.44544	3.764	2.49177	2.09084	0.000448859	-1.02157	down
MruG045885		3.04036	3.57606	2.12366	0.143635	0.351229	0.476359	8.3498e-14	-2.62584	down
MruG011322		0.376859	0.50029	0.521069	1.37701	1.20424	1.05716	8.28718e-06	1.29411	up
MruG031667		1.55604	2.71623	1.84532	0.142023	0.446207	0.267815	1.96925e-06	-2.06256	down
MruG046142		0.965065	0.696256	0.439334	7.35229	7.21952	8.08388	8.63624e-38	3.20033	up
MruG009571		0.437278	0.471866	0.367614	0.210166	0.155486	0.084789	0.00350996	-1.15699	down
MruG009967		7.66801	7.49126	7.31001	29.3441	24.8286	26.0299	1.8126e-40	1.84178	up
MruG009965		6.51413	7.29412	5.46713	2.02749	1.31087	0.882907	0.000239234	-1.59426	down
MruG009969		53.2525	46.4463	48.2409	23.0349	21	23.9066	9.20855e-38	-1.06683	down
MruG000718		90.7452	122.263	121.658	25.8993	34.2684	35.5982	2.32969e-40	-1.72403	down
MruG025070		3.82987	5.00606	3.38676	1.08717	1.63707	1.16562	1.52609e-06	-1.44077	down
MruG046272		43.0705	45.4592	42.3016	7.1307	6.76975	8.46379	6.02544e-141	-2.47394	down
MruG019203		0.385973	0.655955	0.593386	0.198615	0.161873	0.130141	0.000419961	-1.36192	down
MruG037487		0.100112	0.637869	0.716439	7.73251	8.26999	7.21935	1.96096e-15	3.04739	up
MruG038699		23.14	25.0556	25.655	58.7722	58.9886	57.3269	1.42529e-61	1.28399	up
MruG036341		5.64263	6.95865	6.18733	2.69385	2.47196	3.1942	2.15679e-08	-1.07419	down
MruG034854		3.89942	3.49655	3.48148	10.8109	9.96304	8.90521	1.88385e-37	1.47286	up
MruG032334		29.3664	27.9417	27.9215	53.9257	58.8498	55.8402	4.42368e-27	1.02139	up
MruG035066		1.62119	0.903892	1.83798	0.079939	0.231303	0.323232	1.15199e-05	-1.95359	down
MruG039721		7.18384	7.96391	7.39134	0	0.156556	0.048298	4.04033e-37	-4.91078	down
MruG025888		2.0195	1.38866	3.09999	3.37793	5.54584	5.24866	0.000844929	1.03589	up
MruG025885		16.7803	14.3899	21.1069	5.61945	6.09542	3.88879	1.43798e-13	-1.60574	down
MruG035936		0.743171	1.43292	0.828207	2.88266	2.60176	2.43371	0.00102182	1.21273	up
MruG035935		3.45809	3.75624	3.74229	15.0427	16.2626	18.3724	2.62912e-32	2.13316	up
MruG035939		2.90889	2.10657	2.61024	0.536676	0.503796	0.490682	1.29489e-06	-1.83469	down
MruG044722		9.07147	10.1627	8.19014	0.26713	0.28304	0	1.86213e-34	-4.37044	down
MruG019315		0.832878	1.02099	0.717348	0.062977	0.239338	0.097272	0.000158644	-1.75695	down
MruG034081		8.39447	8.73591	9.02535	1.11635	1.00988	0.569028	7.76093e-51	-3.05536	down
MruG034083		9.72985	7.68405	7.95758	0.780249	0.485819	0.850773	1.11742e-57	-3.32558	down
MruG044426		0.679486	0.609565	0.950178	2.28238	1.42536	2.15693	0.000967977	1.19989	up
MruG025222		12.2175	12.173	10.2806	3.88919	3.66185	3.32937	5.46519e-32	-1.58697	down
MruG025223		13.8647	12.4369	11.415	3.21253	3.23451	3.28393	6.77769e-46	-1.8688	down
MruG016995		0.180772	0.385544	0.269657	1.43079	1.38006	1.2227	1.53627e-10	2.00716	up
MruG014844		0	0	0.095456	1.44487	1.2966	1.57558	1.25817e-11	3.10039	up
MruG046680		1.81745	0.988113	0.904033	0.392058	0.505411	0.582337	0.00326538	-1.08627	down
MruG012738		11.6077	14.313	8.02343	3.72122	3.50508	3.88422	3.96163e-08	#NAME?	down
MruG005869		0.122169	0.156933	0.217176	1.08606	1.0689	0.62502	2.05545e-05	1.84068	up
MruG000560		2.56935	3.4772	3.33938	1.15578	1.53877	1.15456	0.000907029	-1.09321	down
MruG002906		37.8289	40.7034	36.9798	2.7744	2.48523	2.38256	9.75205e-108	-3.72367	down
MruG004533		25.343	27.1495	26.9923	57.3516	50.5819	51.1982	2.36295e-55	1.04325	up
MruG004537		32.3725	34.1893	31.1722	13.2717	13.8934	17.2169	5.55782e-13	-1.06566	down
MruG004536		2.4039	2.36814	1.47911	0	0	0	6.50224e-19	-4.03339	down
MruG008766		1.69694	1.56936	1.84043	0.18402	0.205416	0.193915	1.73218e-32	-2.8525	down
MruG024375		1.18808	0.947582	1.49386	4.89957	4.63204	4.44202	6.13876e-19	1.87998	up
MruG037775		31.6529	32.6933	30.1533	8.44624	8.13715	11.352	4.01064e-26	-1.6635	down
MruG037774		70.5379	72.986	80.3114	14.0096	19.8865	19.9711	5.54334e-37	-1.96036	down
MruG038712		0.284352	0.283639	0.301316	0.866024	0.39654	0.856163	0.00589576	1.08385	up
MruG035605		8.60496	6.99681	7.75874	3.38416	3.30612	3.35405	1.16169e-10	-1.12772	down
MruG035601		126.23	117.286	116.626	13.4033	12.7429	12.4118	0	-3.15614	down
MruG035600		96.4796	101.705	85.2283	8.15031	7.92631	8.44733	0	-3.45285	down
MruG014524		50.6806	51.7259	51.2913	22.7553	21.0192	23.0462	9.7874e-59	-1.14701	down
MruG050033		0.983619	1.61171	0.873197	5.02195	3.65884	4.34851	3.36246e-05	1.58855	up
MruG050032		1.71049	1.60196	1.14835	5.74704	3.64366	3.50898	2.54635e-08	1.45788	up
MruG026786		3.84191	3.16573	3.4751	6.9554	7.70236	8.23118	3.34342e-12	1.13584	up
MruG034955		8.50613	8.22741	11.6264	4.46812	4.09281	2.95873	0.000113686	-1.12895	down
MruG026758		8.30218	7.53665	7.83194	16.9181	16.8367	19.7016	5.27914e-25	1.2033	up
MruG017108		2.80692	1.96575	2.12234	1.13378	0.311946	0.939537	0.00296224	-1.18983	down
MruG017102		2.84151	5.2218	3.01279	8.9108	7.30101	6.90148	4.08538e-05	1.03317	up
MruG017103		7.16632	8.62618	7.8109	3.05369	2.86964	2.63116	7.15102e-16	-1.36921	down
MruG020312		6.78736	7.06047	7.1873	2.63226	3.26446	3.41584	0.000796159	-1.01937	down
MruG025923		0.214926	0.584984	0.578955	1.09436	1.04952	1.74693	0.00924797	1.15582	up
MruG025922		1.34407	0.881404	0.991893	0.391401	0.401177	0.459515	0.00231066	-1.1029	down
MruG018748		0	0	0	2.01273	1.25836	1.13775	2.29537e-15	3.68064	up
MruG011196		1.2111	1.84369	2.87529	7.8444	8.21312	7.1864	3.33357e-08	1.76259	up
MruG011192		3.3722	3.39307	2.23743	1.4537	1.10416	1.23159	0.00102775	-1.05351	down
MruG019292		6.70784	6.36733	6.70033	3.72686	2.06963	2.66481	7.30443e-08	-1.11464	down
MruG034161		2.34629	2.09502	2.65846	0.91116	0.911306	0.917865	2.60708e-05	-1.20671	down
MruG010576		4.12007	4.72757	4.34461	10.0126	10.5234	12.4445	1.52364e-18	1.33131	up
MruG030959		0.160327	0	0.34554	1.0599	1.0523	0.778886	0.000598117	1.64945	up
MruG040904		1.89557	1.8347	1.79463	0.39958	0.133804	0.384228	0.000202848	-1.71294	down
MruG011827		5.67325	5.93298	4.38246	12.031	9.90028	10.1842	2.33346e-11	1.02936	up
MruG003348		0	0	0	9.32663	8.47864	7.4703	6.23962e-18	3.9246	up
MruG029773		1.17187	0.662375	0.485552	5.91287	7.07593	6.51777	3.23557e-21	2.77353	up
MruG004313		40.0286	40.482	39.5289	16.9316	16.7314	14.7618	1.63719e-50	-1.25112	down
MruG004314		1.89393	2.91302	1.90362	5.87324	6.48083	7.66097	6.41292e-07	1.45517	up
MruG007959		0.094056	0.081518	0	3.0021	2.42028	2.18663	2.50474e-14	3.37726	up
MruG045352		25.6768	24.3853	22.28	0.900527	2.32073	1.93065	1.61565e-57	-3.56064	down
MruG008443		2.05512	1.59112	1.94974	0	0	0	3.74871e-22	-4.29846	down
MruG047009		0.537913	0.542546	0.658105	0.362803	0.098836	0.186156	0.00216139	-1.15378	down
MruG038841		769.065	737.135	756.236	269.444	274.275	299.266	1.65971e-110	-1.37095	down
MruG014911		55.6862	55.8149	44.5237	93.6334	98.3232	161.306	6.7523e-05	1.12468	up
MruG026812		1.44829	1.80061	2.24945	0.409901	0.256156	0.541628	0.000547684	-1.54408	down
MruG024061		1.67696	1.86546	1.31243	0.464292	0.405857	0.573877	0.001572	-1.32547	down
MruG005543		7.4492	9.98652	7.315	2.52463	3.8973	3.69775	5.0782e-06	-1.16153	down
MruG008479		0.963699	0.315151	0.427486	1.88225	2.1626	1.60538	0.000289022	1.42822	up
MruG046569		1.37026	2.54992	2.31778	5.12503	4.62101	5.18198	1.56726e-05	1.18662	up
MruG034360		63.3942	64.754	67.3761	151.898	201.311	192.6	8.83053e-45	1.5107	up
MruG042026		0.247824	0	0.736081	10.1946	8.35418	10.3105	1.65882e-18	3.51867	up
MruG046388		4.73096	6.02493	5.23816	12.7461	15.6925	12.1963	2.8222e-15	1.34723	up
MruG036856		0.799313	1.05609	0.964335	3.50034	3.71838	3.80174	8.12246e-15	1.87394	up
MruG025671		0	0.059106	0.684492	4.38174	4.18771	6.26435	3.8269e-09	2.70282	up
MruG033737		0.054094	0.115285	0.34036	1.53233	0.998546	1.48556	4.69161e-06	2.06892	up
MruG028621		2.85864	3.0451	1.77251	9.02232	8.55075	9.38327	2.56995e-17	1.76343	up
MruG009312		1.1369	1.19087	1.32268	13.281	11.7425	11.2251	1.87801e-18	2.83121	up
MruG008817		2.05493	4.35576	4.19933	0	0	0	3.69862e-16	-3.77982	down
MruG012540		5.0168	4.80785	4.74389	2.43098	2.08144	2.08803	2.82966e-18	-1.07189	down
MruG010946		114.58	114.779	115.483	554.54	540.7	556.502	0	2.30193	up
MruG011015		7.49254	7.07134	7.29428	1.55848	0.91271	1.6029	9.43318e-29	-2.2486	down
MruG016044		0.5701	0.544702	0.679092	0.137982	0.217647	0.192173	0.00572379	-1.243	down
MruG016042		1.0801	0.750174	1.56199	4.18513	2.47104	3.45027	3.18448e-07	1.46712	up
MruG004018		0.549295	0.88656	0.68903	0.133438	0.041785	0.084392	1.01565e-07	-2.20534	down
MruG024062		7.68355	5.04569	6.39791	14.9589	16.9818	18.3095	3.9104e-09	1.34814	up
MruG011835		6.61514	6.23171	8.29895	1.02975	1.30599	1.30836	2.95521e-28	-2.36137	down
MruG001844		4.95713	3.99191	3.99487	1.44547	1.81651	2.38605	2.00402e-06	-1.0851	down
MruG023078		4.87623	4.09765	4.90092	1.97558	1.36397	1.16264	1.9424e-12	-1.48874	down
MruG047141		0.104367	0	0	2.79193	3.44708	2.96862	5.10454e-13	3.32635	up
MruG047140		3.53509	4.27576	4.6099	8.78023	7.81071	8.06702	4.86533e-13	1.01259	up
MruG023075		68.0946	91.0155	92.2334	21.2887	20.1124	20.7096	3.08623e-37	-1.91651	down
MruG039478		2.38296	3.68461	2.57723	18.1757	17.887	18.6312	5.60127e-61	2.62856	up
MruG023072		2.42644	3.65666	3.78083	0	0	0	5.7954e-14	-3.53446	down
MruG014364		0.358375	0.401333	0.471895	0	0	0	3.86145e-23	-4.3754	down
MruG049458		0.809954	0.542789	0.441728	0.016242	0.049627	0	2.63032e-08	-2.62454	down
MruG038281		0.627258	0.501976	0.704521	1.67027	1.6128	1.13454	3.20906e-05	1.18197	up
MruG047993		4.17796	3.51922	4.964	0	0	0	5.31973e-37	-5.25579	down
MruG006182		0.334693	0.202712	0.138858	0.863327	0.520406	0.472193	0.00856995	1.15201	up
MruG007525		1.6182	0.771393	1.03418	2.58767	1.89708	2.87999	0.00274096	1.01155	up
MruG045284		1.72079	1.70071	1.65409	0.704032	0.415486	0.180508	0.000885455	-1.42052	down
MruG033112		0.672861	0.552766	0.499012	1.76268	1.66856	1.98808	1.0337e-05	1.46971	up
MruG033117		0	0	0	1.92233	3.66075	2.89944	7.68034e-15	3.62651	up
MruG045821		5.6988	5.45329	5.02937	1.66697	1.10529	1.25233	3.59197e-22	-1.86199	down
MruG049336		2.34443	3.54128	2.73622	1.43692	0.879612	1.32165	9.07782e-05	-1.09212	down
MruG018045		11.1908	10.4085	9.64224	2.74613	4.66502	6.06294	0.000832129	-1.04227	down
MruG047463		0.37359	0.576351	0.627618	1.28856	1.45436	1.47234	0.000512829	1.23803	up
MruG024715		5.15521	3.87319	3.66118	0.42098	0.389917	0.479247	3.03889e-14	-2.68845	down
MruG022715		172.588	180.042	172.55	31.0311	37.681	36.9328	1.41301e-127	-2.24639	down
MruG034669		2.69322	3.02785	1.99959	5.15486	7.07834	4.46874	2.41652e-06	1.09358	up
MruG034666		6.39591	6.60107	7.43734	45.3495	46.1711	49.7682	8.39184e-152	2.79686	up
MruG037313		92.3085	88.4091	94.5843	43.7038	40.0065	43.2168	2.09538e-46	-1.06285	down
MruG023399		0.318514	0.248687	0.20675	0.043991	0.051964	0.033526	3.86082e-08	-2.04653	down
MruG015009		0.707362	1.34806	1.85353	3.1845	3.16358	2.80195	0.00242756	1.08389	up
MruG023976		19.2217	18.8938	18.4569	47.2556	43.9905	36.0712	4.57449e-23	1.19877	up
MruG021539		4.27559	5.48508	2.19573	8.97208	8.84834	9.78269	0.00136144	1.09756	up
MruG017690		3.70955	3.56246	3.39798	1.87233	1.25431	1.33017	9.11452e-05	-1.08775	down
MruG019584		1.08721	1.688	1.13507	0.479324	0.369542	0.363112	0.000235927	-1.36066	down
MruG019580		1.0715	0.938265	0.54419	7.28179	6.60488	6.8311	7.03145e-37	2.86869	up
MruG017529		7.14659	5.97293	6.09247	0.369209	0.345061	0.182561	1.37921e-72	-4.05865	down
MruG019056		99.4306	106.409	103.235	395.482	392.82	431.896	1.44032e-226	2.01954	up
MruG014996		0.68616	0.689898	0.808069	0.057478	0.214174	0.1422	5.40223e-06	-1.8571	down
MruG001236		2.19642	1.51922	1.56982	0.266912	0.309162	0.32042	6.96277e-07	-1.95456	down
MruG001235		3.85199	3.44011	4.15053	0.113584	0.09749	0.015523	5.5552e-32	-4.28013	down
MruG013513		3.59313	4.1218	4.00138	8.08757	8.49341	8.84325	2.991e-13	1.13261	up
MruG000950		0.210435	0.353229	0.22316	0.810923	0.453196	1.05103	0.000471188	1.32339	up
MruG002760		4.74939	6.66251	7.0932	0.975874	1.35019	1.00509	4.04195e-05	-1.7755	down
MruG000616		6.58719	6.84638	8.33439	1.61497	1.19361	1.43482	7.57456e-12	-2.03149	down
MruG005269		0.804791	0.792725	0.783537	0.418979	0.232607	0.104504	0.000400813	-1.32802	down
MruG040478		6.43944	5.39279	3.15196	11.9469	9.90387	10.2853	0.000536139	1.03552	up
MruG040473		1.95125	1.90498	2.27319	0.29164	0.323311	0.108467	1.17614e-16	-2.6344	down
MruG040471		30.2037	32.7805	33.3975	12.2611	13.4123	15.9336	7.64853e-17	-1.1425	down
MruG042830		17.0869	17.8376	15.0797	32.383	32.9411	33.5938	1.03485e-26	1.02199	up
MruG042836		14.0934	14.7567	14.0999	26.7852	25.934	31.8344	2.13183e-21	1.01139	up
MruG048189		0.321375	0.522278	0.304387	0.010656	0	0	9.1061e-11	-3.07745	down
MruG003147		9.57535	7.83033	10.7794	0.857655	0.357024	0.269887	2.62504e-29	-3.56088	down
MruG003142		0.271955	0.154994	0.272245	0.530131	0.696292	0.359409	0.00809753	1.00817	up
MruG030143		3.98893	3.61833	3.67746	1.5542	1.21398	1.6524	1.64349e-05	-1.19059	down
MruG007646		0.275631	0.346808	0.210073	0.891757	1.02134	0.826643	0.000233958	1.43707	up
MruG038798		1.79597	1.97769	1.32268	9.50427	5.43426	4.4708	1.13882e-06	1.66988	up
MruG022553		4.23918	4.55368	4.72646	13.3551	12.2765	14.9999	6.86882e-16	1.56211	up
MruG022559		26.3091	29.3372	27.071	10.0511	8.95796	9.80895	1.41104e-31	-1.44616	down
MruG022083		6.53406	7.25029	7.57075	17.6642	14.873	18.3925	7.82249e-20	1.27016	up
MruG019060		10.9084	13.4634	13.217	5.45794	5.28899	4.90245	1.67449e-11	-1.1752	down
MruG048204		1.87315	1.93574	1.67407	6.28026	5.35714	4.68305	1.52305e-24	1.57908	up
MruG048206		2.76957	2.36241	2.6639	0.636169	0.518861	0.759944	2.67137e-06	-1.64617	down
MruG045290		245.339	246.91	229.787	25.3912	23.3421	24.5866	0	-3.23603	down
MruG045327		3.99691	5.79655	4.73449	24.3963	29.1173	26.7254	2.14843e-57	2.44463	up
MruG031015		0.33846	0.414127	0.193575	1.38074	1.33223	1.38607	0.000170151	1.62618	up
MruG024036		101.293	102.794	116.667	36.7063	37.2702	41.7914	6.90048e-43	-1.40763	down
MruG035874		1.59351	1.98021	1.59665	0	0	0	1.00271e-11	-3.25876	down
MruG035872		3.00366	2.72149	2.80173	0.364524	0.117452	0.192567	1.95154e-20	-3.01202	down
MruG019210		0.556538	0.532987	0.742594	0.156947	0.013963	0.12336	3.51264e-05	-1.82885	down
MruG011134		6.17304	6.09189	6.53915	11.0502	14.4824	12.4693	5.24257e-08	1.01787	up
MruG004145		0	0	0	10.3895	8.19361	7.26249	2.68559e-26	4.59169	up
MruG008450		5.44489	4.12079	4.89397	0.540148	0.828303	0.483337	1.09327e-10	-2.39089	down
MruG032058		4.18113	3.86063	4.62799	1.39193	1.23168	1.32569	2.39649e-14	-1.54966	down
MruG036742		1.73	1.83725	0.988184	5.38131	5.22626	3.88098	3.65835e-08	1.55624	up
MruG018876		0.932222	0.898786	0.872805	2.72174	1.98982	2.18366	2.9069e-18	1.3592	up
MruG005440		9.31444	9.03138	8.75537	3.3062	3.94172	4.49899	1.14896e-05	-1.08219	down
MruG005442		10.7996	10.8783	12.7997	0	0	0	4.40643e-37	-5.25148	down
MruG005443		232.864	228.659	213.862	46.699	47.2186	54.3544	1.05955e-183	-2.1272	down
MruG014149		8.17324	9.28995	9.19545	2.6017	1.52064	1.44019	5.85366e-18	-2.05084	down
MruG016178		3.53487	2.72677	2.97098	1.0794	1.23666	1.27478	0.000144309	-1.17281	down
MruG011264		4.55511	4.19093	3.59424	0.511416	0.23027	0.200853	5.75482e-13	-2.81514	down
MruG001373		0.426385	0.381925	0.3199	1.27106	1.28701	1.26196	0.0001325	1.46616	up
MruG031874		11.7256	8.62843	11.4652	4.19392	2.83846	3.53251	1.29583e-05	-1.35494	down
MruG049143		4.64392	3.7905	3.99902	0.7404	1.00422	0.494773	5.46496e-10	-2.0799	down
MruG049142		6.61871	6.72466	5.81421	0.710186	0.836852	0.52245	1.0893e-22	-2.83696	down
MruG046301		50.2324	51.1279	52.4426	22.8428	20.1552	22.6586	3.1806e-46	-1.1711	down
MruG025182		39.3184	43.9637	42.7403	0.737853	1.02624	0.909202	6.38294e-130	-5.16973	down
MruG047656		2.734	3.23891	3.59495	0.942636	0.841971	0.353495	3.75069e-09	-1.85794	down
MruG039588		7.32105	6.83045	9.70146	3.96163	2.4688	3.66009	0.00684829	-1.00145	down
MruG039584		2.84319	2.28218	2.32031	4.68887	5.91993	5.00404	5.14177e-08	1.07132	up
MruG037180		4.92889	5.79988	5.80698	0	0	0	3.9032e-40	-5.40863	down
MruG038182		1.11322	0.700511	0.836452	8.0325	10.7293	8.26398	2.17662e-18	2.86675	up
MruG016812		4.63509	3.62092	3.51982	1.40353	1.93584	1.77775	3.38751e-07	-1.09791	down
MruG022322		1.49396	1.35213	1.03768	0.486045	0.182769	0.533784	0.000778239	-1.31893	down
MruG022323		1.35764	0.90598	0.99719	0.210823	0	0.208984	5.85198e-06	-2.03409	down
MruG031912		1.42139	1.08491	1.04866	0.286264	0.415976	0.310915	2.59338e-05	-1.4854	down
MruG024919		4.09511	4.4796	4.13157	0.679	0.747359	0.543601	4.89603e-13	-2.3009	down
MruG024918		10.1588	12.8438	11.2717	21.7496	23.8414	27.1594	1.85763e-11	1.09804	up
MruG024913		14.2076	16.1343	14.7567	41.0469	37.5781	40.7871	7.84821e-32	1.42933	up
MruG008182		14.7769	15.0178	15.1312	34.866	35.2776	33.4902	2.30822e-64	1.2452	up
MruG010327		2.41441	1.84718	2.29017	4.7381	6.08381	5.82042	0.0037905	1.13736	up
MruG017805		0.571383	0.447718	0.368755	1.81823	2.03956	1.87134	2.30317e-06	1.72748	up
MruG017803		1.23932	0.841007	1.17067	0.447373	0.350349	0.494175	0.000917149	-1.10769	down
MruG035783		9.87376	10.912	9.34132	3.9691	3.15603	4.02587	5.02552e-19	-1.3454	down
MruG043130		4.33277	4.70059	3.83361	0.445033	0.699613	0.37813	5.27005e-21	-2.71123	down
MruG040824		0.203371	0.367649	0.395966	0.890609	0.822051	0.852988	0.000311093	1.24789	up
MruG040826		0.835177	0.843109	0.805735	0.249562	0.30232	0.309201	0.000100554	-1.29015	down
MruG040822		1.68264	2.19417	1.59733	4.74163	3.7734	3.84013	1.14218e-11	1.18263	up
MruG034290		1.59393	1.4074	0.965553	0.234257	0.069413	0.026258	7.24945e-10	-2.57402	down
MruG013007		2.60961	1.98794	2.1875	0.129359	0.179696	0.088318	2.13408e-31	-3.51663	down
MruG013006		0	0.143685	0	26.8968	25.9293	31.5532	1.82963e-79	6.57777	up
MruG037826		1.37278	1.29233	1.59229	3.79219	4.40652	3.40138	6.58555e-05	1.31465	up
MruG023269		3.14144	3.50405	2.78427	1.04168	1.0559	1.02389	4.76985e-15	-1.48459	down
MruG023263		0.446215	0.535303	0.894596	2.78603	4.98417	3.43211	2.24782e-07	2.04524	up
MruG043072		3.40276	3.36244	3.76472	1.45836	1.35612	0.781033	6.63567e-07	-1.36221	down
MruG013912		3.8025	4.47811	4.86854	1.00469	2.55731	0.900615	7.45965e-05	-1.32272	down
MruG025874		4.67021	4.98233	4.48324	1.52096	1.30833	1.20429	1.40632e-11	-1.63591	down
MruG034299		8.682	10.0377	10.8327	20.3487	22.3507	22.8257	1.21815e-19	1.17129	up
MruG033440		3.78335	3.60935	4.03723	2.03082	1.72981	0.91947	0.000228378	-1.11363	down
MruG038344		1.07738	0.616426	0.857996	1.99373	1.99274	2.03083	6.90287e-08	1.2116	up
MruG015425		1.45693	1.30316	1.0586	0	0.060644	0.185305	3.22582e-06	-2.24614	down
MruG030602		1.82208	2.23027	2.70006	0	0	0	2.72963e-16	-3.78236	down
MruG043666		26.0343	25.1428	25.2017	6.79419	6.47339	6.1411	3.68126e-89	-1.90655	down
MruG043665		2.97749	3.65445	3.11924	0.387014	0.4943	0.570168	1.26618e-14	-2.38432	down
MruG031285		1.54446	2.80358	2.1093	31.4332	25.0937	24.7418	2.85607e-96	3.57309	up
MruG031286		0.652169	0.690033	0.656251	27.2716	23.5892	19.9694	2.92997e-187	4.98909	up
MruG001657		1.57982	2.45402	2.67916	10.3193	9.32712	8.37745	2.98207e-14	1.94781	up
MruG027954		0.080792	1.18099	0.737818	3.84253	4.84649	2.71395	2.38816e-05	1.85281	up
MruG027952		0.459621	0.975804	0.596993	0.100958	0.097569	0.138722	1.42566e-05	-1.86599	down
MruG003650		0	0.068273	0.168911	2.13993	3.5517	1.99104	3.24244e-11	2.99715	up
MruG046408		3.59548	3.40126	3.14743	0.908609	1.23246	2.28895	0.00275632	-1.01133	down
MruG047751		3.69673	3.31938	3.65906	0.930229	0.817661	0.822936	2.97076e-15	-1.86756	down
MruG024791		0.835545	1.14922	1.05824	0.279129	0.219079	0.398934	0.000448784	-1.36377	down
MruG039139		0.056294	0.014068	0.022371	1.36527	0.711286	1.04259	3.5e-19	3.57757	up
MruG039138		80.2102	77.0681	76.4051	34.2007	35.8379	34.3044	8.02556e-50	-1.10915	down
MruG032240		2.97868	3.7715	4.97856	1.35006	1.44728	0.956836	0.000770318	-1.30313	down
MruG023960		0.670558	0.435976	0.552426	0.089161	0	0.104439	4.27757e-06	-2.0823	down
MruG006970		0.487983	0.49818	0.534767	1.74516	1.24013	1.45642	0.000229471	1.32195	up
MruG048912		8.71448	7.43719	8.99883	2.78306	2.71761	2.73389	1.5286e-06	-1.40072	down
MruG030070		7.34276	7.47927	7.69697	21.6183	17.6018	21.913	6.8891e-26	1.45586	up
MruG030073		2.27222	2.88562	2.85901	8.66568	7.1065	8.81989	6.157e-19	1.59433	up
MruG033673		0.952324	2.25925	1.96425	3.16844	5.65952	4.493	0.000611502	1.20501	up
MruG023465		0.539738	0.323195	0.624806	1.4344	1.85248	1.16382	0.000936111	1.29665	up
MruG023468		0.191769	0.376027	0.343904	0.899247	0.93496	1.73765	0.000535088	1.50554	up
MruG024895		1.04424	1.41155	1.06035	2.98574	2.08947	2.62446	0.00451561	1.00529	up
MruG019500		7.46575	7.25887	6.45905	20.6298	20.6883	22.9182	3.23221e-51	1.62546	up
MruG029321		20.7026	20.0102	19.905	266.724	247.498	247.896	0	3.68378	up
MruG025853		2.48838	2.1	2.04239	1.1941	0.596628	0.536805	1.00886e-05	-1.30833	down
MruG011750		18.0401	20.9662	20.4933	40.7949	44.778	46.4413	1.05598e-27	1.18115	up
MruG011283		18.9296	20.1759	18.8296	55.1786	47.8532	49.4971	4.99428e-72	1.43342	up
MruG011282		1.98016	2.56595	3.08032	0	0	0	3.42231e-27	-4.67237	down
MruG044265		0.864284	0.649941	0.297516	1.6	1.5712	2.03331	0.00103754	1.278	up
MruG015505		0.958825	1.57841	1.0578	3.57151	2.99082	2.93669	1.50858e-10	1.37635	up
MruG015507		13.3385	13.0242	11.1899	2.2825	2.11904	2.55028	3.41569e-80	-2.34305	down
MruG015508		18.5799	22.6842	20.4315	102.598	100.955	106.339	1.30004e-200	2.35961	up
MruG015509		1.13662	0.946717	1.30153	0.217324	0.195798	0.253703	1.15392e-05	-1.76615	down
MruG008020		982.703	962.473	977.588	310.006	376.033	396.525	1.28588e-56	-1.37242	down
MruG008025		2.20657	1.72837	1.53845	0.415276	0.319932	0.460931	0.00019456	-1.60083	down
MruG010153		17.681	12.6249	16.9274	48.8639	49.5711	59.5517	1.49209e-37	1.75008	up
MruG009648		3.35167	2.747	2.75002	1.35766	0.880312	1.27163	7.69796e-05	-1.15311	down
MruG005154		4.94032	6.64872	7.03932	12.363	12.8056	16.0236	5.60189e-08	1.13159	up
MruG014671		4.14936	3.25717	4.63891	0	0	0	3.32037e-36	-5.2134	down
MruG014673		2.92531	2.43081	4.24085	1.11343	1.21555	0.991064	0.00163109	-1.22748	down
MruG003416		2.27987	2.07415	3.24838	0.280468	0.634908	0.147516	5.42112e-08	-2.17979	down
MruG003411		0.006964	0	0.010742	0.65603	0.522874	0.578897	1.12726e-14	3.49924	up
MruG001924		0.551993	0.425392	0.220696	1.17447	1.41866	1.77878	5.6196e-05	1.55527	up
MruG041347		1.07076	1.03957	1.09842	0.301507	0.111437	0.089719	2.82017e-05	-1.84478	down
MruG028518		214.071	211.656	208.099	441.23	440.132	457.452	2.35594e-117	1.12369	up
MruG038062		1.15367	0.555611	0.736271	3.58987	2.00547	2.63062	0.0019675	1.34273	up
MruG038060		6.26333	5.4815	5.73103	1.90956	1.416	2.40398	4.77675e-09	-1.4481	down
MruG046527		88.4137	116.938	94.132	194.078	203.666	200.218	2.90456e-23	1.03316	up
MruG012140		4.64679	4.92011	4.92455	1.96601	1.34123	1.433	1.14403e-09	-1.4493	down
MruG005977		18.9314	23.6116	22.0086	45.5101	50.0723	50.8118	1.40099e-37	1.21666	up
MruG048584		14.3507	19.0314	17.1598	5.0955	8.92897	8.14184	0.000288905	-1.04649	down
MruG000808		0.47509	0.50028	0.640571	0.226158	0.189212	0.08962	0.00298476	-1.2568	down
MruG044550		7.44046	8.63059	6.3392	17.6368	15.29	22.0391	5.41818e-07	1.24744	up
MruG028324		7.23127	8.0752	7.91202	16.8251	17.356	17.9462	8.37984e-17	1.1851	up
MruG028326		5.41327	5.61783	5.29667	1.04308	1.51388	1.1954	1.2814e-13	-1.92319	down
MruG040131		10.2101	11.2138	10.8401	1.91037	1.70795	1.66156	5.1115e-82	-2.50692	down
MruG040130		6.41458	6.66917	6.62265	2.33024	1.85494	1.7995	3.23303e-08	-1.51128	down
MruG041664		5.89704	6.84845	9.15638	3.27553	1.55854	1.94983	9.68652e-05	-1.38886	down
MruG003752		5.8666	5.16592	6.16375	12.1781	12.958	13.7054	4.08665e-08	1.1563	up
MruG034296		15.2816	15.0927	15.4601	8.55117	3.9558	6.66067	4.52188e-10	-1.16531	down
MruG030363		2.10316	2.14349	2.06865	1.0941	0.797408	1.02042	1.30019e-06	-1.01224	down
MruG045692		2.04231	1.49943	1.38179	0.808829	0.446794	0.505153	1.12787e-05	-1.28443	down
MruG018169		1.97117	1.49249	2.24369	5.88427	5.52542	4.53241	1.70855e-05	1.35018	up
MruG018166		1.99276	3.21714	2.37997	9.79057	7.39475	10.7053	8.36894e-10	1.74601	up
MruG018163		0.386934	0.464669	0.446191	1.06501	0.984372	1.48024	4.0176e-07	1.36278	up
MruG024615		0	0	0	9.24857	7.0099	7.75064	1.07572e-15	3.70818	up
MruG024616		0	0	0	10.8539	8.86059	9.09458	8.65713e-32	4.93685	up
MruG022614		25.5304	30.284	26.8556	78.0053	85.3094	103.479	5.44242e-49	1.71134	up
MruG022610		1.08378	1.5775	1.85538	6.22583	6.10272	5.03507	9.63545e-06	1.6471	up
MruG022618		23.9694	20.4707	26.6619	64.6645	69.1932	62.33	1.38776e-39	1.48848	up
MruG037218		0.881207	0.686687	0.73522	1.73237	1.98174	2.73995	1.65319e-05	1.34882	up
MruG017381		17.4656	16.6434	14.5147	2.31605	1.83126	2.12419	3.68921e-52	-2.78145	down
MruG023053		1.64527	2.00537	2.39043	5.1769	4.90687	3.81874	6.46482e-07	1.1689	up
MruG017402		22.9569	20.6716	21.9054	45.2914	51.5547	51.63	2.58575e-24	1.2057	up
MruG019711		4.12679	4.69287	5.91123	1.74835	1.41435	2.06339	7.49746e-10	-1.36586	down
MruG029159		0.185584	0.098277	0.167866	0.781993	0.640861	0.578296	1.61873e-06	1.79055	up
MruG021103		5.69682	4.31862	2.66796	1.54906	1.78218	1.65722	0.00568108	-1.07177	down
MruG018449		3.22661	2.16377	3.55512	7.11255	8.45111	9.26521	2.84781e-06	1.36747	up
MruG031421		17.3645	16.7347	15.6535	2.91999	3.20377	2.85546	3.87333e-31	-2.3007	down
MruG045169		1.71236	2.53478	2.03132	0.141951	0.370868	0.082553	7.76173e-11	-2.57227	down
MruG005695		0.197669	0.579641	0.22483	2.3778	1.47903	2.36705	7.35664e-10	2.22218	up
MruG005692		1.90964	1.75537	1.74284	0.744483	0.912273	0.719718	5.53001e-05	-1.05421	down
MruG031969		0.022266	0.010423	0.04383	4.0086	5.04054	4.53157	3.34823e-79	5.96671	up
MruG009852		14.3803	15.1798	12.7029	8.36904	4.48595	6.50286	3.34229e-08	-1.03482	down
MruG037144		89.3947	80.6269	80.5536	179.693	200.593	216.631	1.0617e-53	1.2908	up
MruG039711		4.81219	5.74212	3.98353	15.1338	15.3561	15.842	3.26907e-33	1.68349	up
MruG002778		27.9922	30.0424	28.6954	58.5182	62.6816	64.0538	7.77276e-35	1.13091	up
MruG030621		0.083035	0.103672	0.096869	4.03613	4.51771	4.90682	3.09926e-45	4.637	up
MruG030627		1.16619	0.344309	0.84529	26.1975	26.0018	30.0703	1.02094e-31	4.24197	up
MruG038456		36.8785	35.9042	37.3765	16.3743	16.8481	16.5702	3.17578e-39	-1.09043	down
MruG007453		2.05376	2.48514	2.43262	0.842253	0.665129	1.17335	5.91252e-08	-1.25407	down
MruG000103		507.861	550.859	525.811	2645.74	2484.53	2609.1	0	2.32853	up
MruG046801		0.415311	0.458631	0.134411	1.32822	1.56749	1.00913	5.50169e-05	1.60678	up
MruG031996		5.90221	6.01568	6.97433	25.4987	21.0063	22.4158	8.3705e-65	1.88541	up
MruG031990		0.015065	0.169707	0	3.26099	3.84711	2.66609	1.5179e-05	2.18305	up
MruG040078		4.81791	4.6741	4.93626	1.31141	1.08632	1.59645	1.36007e-14	-1.7018	down
MruG027246		1.78462	2.09601	1.6787	6.00234	4.62356	4.98083	2.06842e-09	1.43117	up
MruG019156		1.13598	0.751057	1.62624	0.384806	0.391299	0.301439	0.00154697	-1.30253	down
MruG034464		1.49855	1.87439	1.68548	5.3013	5.35091	6.56993	1.42534e-17	1.72688	up
MruG017885		0.669081	0.983141	0.425429	1.66066	1.37289	1.47738	0.000180918	1.06525	up
MruG023152		7.63015	9.24712	9.67017	3.25461	3.52878	3.99097	2.09294e-06	-1.1718	down
MruG026656		0.098736	0.231453	0.095145	1.4673	1.22342	1.37129	3.81134e-10	2.49595	up
MruG007508		0.101981	0.106317	0.096681	0.881539	0.872792	0.814784	1.25082e-08	2.28633	up
MruG028521		0.246885	0.200788	0.131373	5.35623	3.33203	4.2766	3.23849e-17	3.32961	up
MruG042247		0.466213	0.996477	0	2.33189	4.24187	2.20541	0.000619267	1.66511	up
MruG049869		20.7741	18.2363	19.1069	4.32044	7.241	7.0381	1.78519e-15	-1.53449	down
MruG038928		0.64114	0.504326	0.551357	0.209041	0.212024	0.186819	0.00205884	-1.19245	down
MruG004538		4.02578	4.13418	5.02161	54.792	60.2075	61.6141	2.30725e-238	3.72965	up
MruG014776		4.12472	4.86612	4.67561	0.507965	0.849609	0.66199	8.4886e-19	-2.45679	down
MruG011040		26.9134	19.1996	21.3225	9.41439	9.05583	9.98637	2.21905e-07	-1.13699	down
MruG005215		3.16605	2.61873	2.56649	0	0	0	4.57012e-14	-3.54293	down
MruG007272		0.758517	0.61763	0.437562	0	0	0	4.88021e-22	-4.29881	down
MruG041456		7.78473	9.13275	9.41904	77.2356	76.8718	81.007	5.56879e-301	3.17608	up
MruG009958		3.52022	2.43486	2.73234	0	0	0	1.19812e-11	-3.24979	down
MruG009954		2.08134	2.63944	2.82175	0.938022	1.04712	0.992266	0.00255619	-1.10324	down
MruG003383		9.34976	8.6497	8.29572	3.69478	2.07742	2.83735	3.69395e-08	-1.42753	down
MruG000722		3.4566	2.76896	3.10755	0.677149	1.39684	0.439512	0.00375217	-1.32712	down
MruG042174		1877.9	1875.69	1906.82	0.175568	0.416882	0.400463	0	-11.874	down
MruG002389		1.39999	1.41253	1.08492	4.43228	3.13865	3.32138	0.000366552	1.2865	up
MruG003034		11.647	13.1543	12.3699	3.01104	3.29879	2.4764	1.01282e-44	-1.98612	down
MruG042172		2245.47	2309.58	2258.92	0.227725	0	0	0	-12.2074	down
MruG031784		105.789	106.447	116.28	368.024	370.311	390.857	1.16265e-178	1.81989	up
MruG031787		334.075	357.769	349.164	1283.05	1203.83	1220.63	0	1.87481	up
MruG045992		12.9474	20.7329	15.3411	1.06129	1.13275	1.43238	1.45863e-31	-3.31745	down
MruG045993		7.02035	14.1261	13.0612	3.44334	1.99922	1.19358	7.6927e-12	-2.05706	down
MruG025737		0.500605	0.521443	0.562541	1.08297	1.77783	1.41168	0.000391345	1.25468	up
MruG001890		1.58127	0.952861	1.07973	3.27161	2.16137	3.10095	0.00143038	1.11416	up
MruG037063		5.12884	6.84329	6.93593	2.73594	2.78835	2.27203	0.000642488	-1.08941	down
MruG037062		11.4405	10.3292	8.56832	6.01107	4.37763	3.95356	4.88751e-10	-1.00125	down
MruG048990		0.524941	0.774101	1.2954	0.112443	0.107828	0.1909	1.31712e-05	-1.91361	down
MruG002811		0.430526	0.716881	0.673258	1.7511	1.71479	1.44687	0.000123567	1.28142	up
MruG048338		5.18487	5.2552	5.01151	1.82413	2.01586	1.47241	1.36689e-08	-1.39719	down
MruG048333		3.73958	3.4446	3.2033	1.9037	1.44851	1.27581	2.55726e-05	-1.03808	down
MruG005824		0.502736	0.864174	0.784402	2.85816	4.14365	3.31401	9.93897e-05	1.69775	up
MruG023614		0.641461	0.833142	0.913008	0.124326	0.093942	0	5.57215e-06	-2.15478	down
MruG012504		3.79199	2.98139	3.58982	1.12242	1.30795	1.12331	5.54638e-11	-1.4191	down
MruG012936		2.03747	1.746	1.86868	0.886688	0.785928	0.689164	5.75548e-09	-1.15446	down
MruG014210		2.09476	2.16888	2.12366	0.448104	0.531188	0.428991	2.56506e-05	-1.67197	down
MruG020909		44.522	41.4509	46.8381	16.173	14.8542	12.5361	1.7264e-35	-1.53113	down
MruG040387		3.93201	3.52089	3.97874	9.92466	12.0113	11.3464	1.84127e-08	1.46412	up
MruG010907		2.83105	2.86962	1.58415	18.4464	19.1999	18.9646	4.82801e-65	2.90673	up
MruG050241		1.52853	0.954517	1.17507	7.21513	7.5288	7.68981	1.05859e-30	2.51097	up
MruG023345		11.7808	13.0234	13.4986	0.075743	0	0	1.36642e-65	-6.15514	down
MruG028590		0.750492	0.861433	1.29921	0.174664	0.278245	0.255008	1.23657e-06	-1.6955	down
MruG013810		9.24715	10.3984	11.053	1.90202	0.93177	2.00588	2.5941e-19	-2.36902	down
MruG041925		2.41165	1.30213	1.35402	0.291552	0.391917	0.430387	0.000104366	-1.61479	down
MruG029641		1.04407	0.809459	0.8738	0.381813	0.153923	0.153332	4.98075e-05	-1.55122	down
MruG042788		3.64669	2.22537	2.78536	13.3415	11.7932	11.9446	1.70867e-17	1.99837	up
MruG042789		1.66582	3.28063	1.76896	5.64256	4.22457	6.66602	0.00265615	1.12196	up
MruG044786		2.97305	2.16915	3.6648	7.55221	7.74645	7.53929	1.02363e-05	1.27858	up
MruG006066		5.36394	4.21307	7.33744	1.63167	2.84433	2.8113	0.000176859	-1.07171	down
MruG009568		70.1098	47.6115	60.525	12.2711	9.86573	13.4704	7.8986e-46	-2.21184	down
MruG009565		33.7463	53.4452	43.587	12.5252	16.4919	13.8726	3.4322e-18	-1.50993	down
MruG009561		10.3401	11.213	12.9199	5.0201	5.51806	4.84459	1.31129e-06	-1.06215	down
MruG040209		6.21575	0.528436	0.982695	0.107556	0.117459	0.139472	0.00072472	-1.73442	down
MruG018578		2.69044	1.76198	1.8685	7.33911	5.32437	6.38819	4.31473e-06	1.44357	up
MruG024695		39.6995	41.6464	44.4025	20.268	18.1419	19.1906	3.73748e-29	-1.06787	down
MruG032328		2.63157	2.18691	2.73659	1.01708	0.65515	0.570303	3.60759e-11	-1.58101	down
MruG031590		3.70664	2.93554	4.70045	11.7866	8.93853	6.72807	0.000611142	1.15475	up
MruG006831		1.44424	0.65482	1.53658	6.07721	4.04669	4.57644	5.71472e-12	1.87503	up
MruG006834		3.36567	3.22822	2.73462	7.76103	8.84226	8.69716	1.60167e-18	1.44164	up
MruG043848		5.74889	5.8489	5.2019	1.94903	2.16896	2.9484	1.8594e-05	-1.11615	down
MruG043843		0.526582	0.635639	0.462622	0.111158	0.058838	0.044975	1.2467e-06	-2.0856	down
MruG048812		4.309	5.01723	4.69595	1.38421	2.10474	2.37861	1.77233e-05	-1.12312	down
MruG043846		8.09882	6.19704	7.33974	2.97101	3.34366	2.73338	2.25367e-10	-1.16461	down
MruG022694		1.70136	1.18448	1.08846	3.65599	1.65935	3.36385	0.000600468	1.05326	up
MruG022695		3.83002	4.78399	4.0446	7.99963	9.1029	8.35873	2.4093e-11	1.02612	up
MruG035675		4.11556	3.82375	3.98425	7.4482	8.61629	8.35351	1.98907e-12	1.05054	up
MruG030240		0.62553	0.554436	0.697217	0.182326	0.026501	0.055333	7.36821e-05	-1.83912	down
MruG050006		3.49439	7.17783	4.53681	44.1088	25.0568	35.0856	6.52764e-34	2.66129	up
MruG050007		1.83072	2.81073	2.94905	9.16016	5.73599	6.41371	8.05775e-05	1.32904	up
MruG050005		0	1.11028	0.816206	16.6039	12.2044	9.43457	0.00373046	1.48724	up
MruG012304		0.139816	0.098793	0.138238	2.74509	2.64233	2.89672	7.25901e-21	3.47735	up
MruG017157		9.36793	6.84663	8.58235	17.7468	16.1067	18.4825	3.1647e-14	1.09828	up
MruG017488		2.87399	1.87728	2.13691	0.208432	0.158885	0.208705	3.15473e-26	-3.1174	down
MruG029407		5.13719	5.16436	2.6821	18.3282	16.0406	21.637	1.12501e-17	2.01602	up
MruG016358		10.1309	8.92657	8.95865	20.0379	23.5993	27.6272	4.20547e-21	1.36065	up
MruG019798		3.35053	3.43093	3.74634	1.01114	1.47071	1.95408	0.000179552	-1.08816	down
MruG009761		5.79928	6.03531	5.58536	2.48454	2.28758	2.4894	1.30178e-06	-1.14054	down
MruG005619		4.3033	3.66165	3.86973	1.33567	1.65708	1.67431	2.58024e-06	-1.20575	down
MruG005611		0.700483	0.584942	0.742214	0.232123	0.242098	0.273747	0.00060199	-1.2038	down
MruG005610		12.7015	12.3265	11.3253	1.93219	1.87789	1.2456	8.50674e-45	-2.66676	down
MruG005613		1.99408	1.51487	1.38935	0.123431	0.101553	0.270492	5.90642e-09	-2.3908	down
MruG014441		0.622912	0.578654	0.259793	1.87807	1.53846	1.90491	0.00048318	1.46365	up
MruG006859		4.40115	2.76275	3.62778	0.652888	0	0.483718	1.30409e-07	-2.29106	down
MruG023669		3.82585	3.69608	2.87675	8.97881	8.51881	8.89433	8.39792e-07	1.27873	up
MruG003517		1.24621	1.42481	1.02261	0.293123	0.176935	0.235748	4.1575e-05	-1.73852	down
MruG028410		4.10411	2.99005	3.21786	1.18716	1.35152	1.98782	3.37643e-06	-1.07317	down
MruG042081		9.88001	8.86399	10.4116	3.21388	4.79126	3.49504	7.12844e-10	-1.24156	down
MruG044663		0.202686	0.06097	0.181785	0.832648	0.529346	0.691921	3.76917e-07	1.85383	up
MruG044660		0.146382	0.105439	0.082157	0.469239	0.421934	0.353598	4.88291e-05	1.58042	up
MruG012079		79.7525	79.1818	77.1764	198.132	164.734	163.662	4.9213e-56	1.19621	up
MruG046538		10.6631	10.5677	7.99498	3.40741	3.78057	3.76275	1.3385e-15	-1.32686	down
MruG007169		0.377678	0.448635	0.562799	0.688276	1.74348	1.32388	0.00689063	1.14261	up
MruG048592		0.415295	0.662481	0.618462	0.107276	0.165959	0.121781	1.58285e-05	-1.67014	down
MruG003898		2.19747	1.61631	1.12732	0.906744	0.540888	0.267634	0.00638616	-1.14242	down
MruG003890		1.45907	1.58642	1.55537	6.37868	3.98298	5.96724	5.50579e-05	1.53031	up
MruG003893		5.09204	5.5676	5.45867	12.0534	11.9121	11.6829	1.17392e-18	1.16657	up
MruG033289		2.80239	2.74348	2.50716	1.05218	0.652183	0.755839	1.32735e-10	-1.53992	down
MruG034396		0.588904	0.781479	0	3.21769	3.505	2.73818	2.56334e-05	1.94134	up
MruG019987		0.854332	1.16395	1.45189	0.431059	0.641608	0.329534	0.0087951	-1.04005	down
MruG028650		1.7728	1.5556	1.30626	0.315912	0.249353	0.28839	1.15221e-17	-2.19875	down
MruG020463		4.19179	4.1743	4.5389	22.8225	18.1218	17.8006	2.60813e-84	2.19907	up
MruG020467		3.00141	3.6478	3.39105	22.5107	18.0575	18.7343	6.56662e-115	2.56889	up
MruG020464		11.159	11.4451	11.9281	60.2086	50.5815	47.6539	1.21032e-137	2.22374	up
MruG012532		14.6524	16.6571	13.6618	30.6115	29.0242	34.9259	1.02665e-19	1.10251	up
MruG044461		24.4928	21.541	20.3507	7.81311	6.522	8.33958	9.87685e-33	-1.47431	down
MruG010026		1.96183	1.78812	2.14663	5.67855	8.20299	7.55313	2.17454e-10	1.74202	up
MruG010022		1.01784	1.92257	1.11554	4.13943	2.76066	3.23773	0.00846223	1.09409	up
MruG015615		17.5909	16.7232	16.1205	55.9537	46.2122	46.4069	3.40099e-82	1.59321	up
MruG015613		11.2399	10.957	11.0704	32.4742	30.6116	30.8968	1.41844e-89	1.53518	up
MruG009486		0.110553	0.01664	0.26393	0.567218	0.778194	0.617778	0.00162426	1.52868	up
MruG018997		4.78797	3.81771	3.6724	20.6397	17.7932	18.1077	2.01492e-64	2.20633	up
MruG001813		15.9933	16.9144	15.0102	42.4394	43.9616	43.4875	1.59374e-72	1.47527	up
MruG001815		8.04048	7.81879	7.27535	0	0.210753	0	3.87695e-15	-3.55946	down
MruG041239		5.58133	5.65546	4.97006	2.39124	1.5417	2.37337	2.38528e-07	-1.2237	down
MruG047173		0.171272	0.587332	0.245166	1.37529	1.44133	1.76765	1.17815e-05	1.75856	up
MruG000021		13.6413	7.78073	8.10653	24.0824	33.3817	20.7112	7.72418e-05	1.28658	up
MruG034162		3.13007	2.99602	4.47144	0	0	0	5.40781e-19	-4.03958	down
MruG021208		0.851708	1.13124	1.30403	0	0	0	8.32055e-16	-3.73415	down
MruG008530		2.04071	1.35069	2.22018	5.39116	5.10475	4.67725	8.72682e-09	1.37708	up
MruG048419		2.72138	2.76027	2.31556	0.483087	0.311313	0.528257	8.93538e-14	-2.23034	down
MruG048415		6.39997	5.85416	7.12316	0	0	0	1.19976e-49	-5.85322	down
MruG048417		43.7996	38.5504	42.5701	0.557003	0.48689	0.308236	2.31804e-233	-6.14676	down
MruG046706		4.00219	5.12739	3.63511	1.22785	0.675664	1.06526	6.01977e-05	-1.60429	down
MruG034587		29.1109	31.6678	28.9663	12.8174	10.577	12.6035	1.85988e-52	-1.25946	down
MruG035985		0.153416	0.137863	0.351813	4.24542	3.2043	3.60332	2.17854e-16	3.16863	up
MruG042112		3.76906	4.16643	4.19358	0.805273	0.707254	1.15546	5.0507e-20	-2.01349	down
MruG032292		12.5306	14.8803	12.7445	2.49335	2.37986	2.291	7.17393e-45	-2.35467	down
MruG032298		0.371987	0.429807	0.362955	1.61602	1.55953	0.767634	0.000152623	1.47628	up
MruG014352		2.4199	3.21937	2.55247	5.86408	5.753	5.15584	3.52713e-05	1.00718	up
MruG026111		17.3807	18.0366	16.5185	5.60388	6.15961	6.7245	1.1608e-16	-1.39894	down
MruG029973		1.81485	1.65314	1.245	0.338474	0.468899	0.202941	2.76176e-07	-1.84323	down
MruG029970		1.53288	0.932246	1.17187	0.238105	0.393657	0.24654	0.000157633	-1.55291	down
MruG015074		2.91797	2.16563	1.88612	0	0	0	2.5811e-23	-4.39398	down
MruG011945		6.6791	5.80952	6.33465	15.0372	13.2415	14.1342	1.4829e-28	1.20139	up
MruG011948		0	0.170008	0	7.36058	5.80921	5.6707	4.04366e-11	3.13339	up
MruG011949		0.36117	0.306578	0.195883	12.4813	9.75302	6.75338	4.97519e-27	3.93137	up
MruG013899		6.62353	6.68911	7.61801	0.293911	0.475508	0.790943	8.19464e-10	-2.6317	down
MruG014382		26.9555	26.3875	28.227	8.05964	11.715	10.1422	7.81973e-18	-1.36585	down
MruG039813		1.51413	1.44035	1.30554	3.6826	3.70062	3.47586	2.37997e-16	1.35631	up
MruG013569		1.85738	1.42318	2.29036	0.447034	0.357816	0.494773	7.84681e-10	-1.83847	down
MruG009075		10.1068	10.9491	8.18837	2.28771	3.35152	3.35491	9.19902e-12	-1.55777	down
MruG023693		3.1707	3.50127	3.76196	1.87515	0.855877	1.41699	0.00126916	-1.09388	down
MruG049709		1.35238	1.18001	0.883756	30.082	36.0386	33.7916	1.00696e-80	4.5181	up
MruG000645		17.4543	19.4712	17.5848	6.62685	5.81818	6.96207	1.67406e-26	-1.41133	down
MruG000646		45.3853	40.1415	48.1157	116.566	132.795	142.341	7.89336e-45	1.57507	up
MruG005233		3.5543	5.89147	6.51136	0	0	0	1.67758e-35	-5.19837	down
MruG042861		0.337446	0.171984	0.396661	1.3555	1.34462	1.57162	6.2786e-07	1.86054	up
MruG036478		26.8475	30.8984	26.9165	74.6466	75.7144	86.6215	5.1265e-32	1.50259	up
MruG031243		12.2853	14.1138	15.4024	25.4678	31.9705	28.2179	7.43703e-09	1.03968	up
MruG032884		0.90164	0.99937	1.60288	4.00827	4.98156	5.26391	1.48948e-07	1.76003	up
MruG032888		16.9678	17.3238	20.4096	90.4835	96.4566	78.4585	2.04699e-73	2.27947	up
MruG035825		2.00159	1.91651	2.53925	0.524948	0.25452	0.240996	6.74001e-12	-2.2412	down
MruG035827		2807.18	2813.3	2771.39	982.974	920.237	973.759	1.15372e-260	-1.49386	down
MruG018736		1.85887	2.34907	1.86293	10.3367	10.6523	11.0818	6.88641e-39	2.34866	up
MruG028492		4.0133	3.90445	3.8443	2.09977	1.13365	1.6541	1.24888e-05	-1.12046	down
MruG028238		1.02272	1.99659	1.65935	4.08291	4.18711	3.61627	3.87656e-05	1.2469	up
MruG005416		10.994	10.2972	8.11782	3.582	3.84093	3.90886	3.017e-15	-1.28848	down
MruG005418		1.27498	0.97541	1.30177	0.376516	0.245055	0.336458	0.000113075	-1.49222	down
MruG010885		5.92535	4.5698	6.60777	10.05	11.6637	13.1051	9.98908e-10	1.03576	up
MruG034303		4.77694	4.78947	4.35496	11.9445	11.1104	9.83577	3.87864e-19	1.26123	up
MruG048669		1.50492	2.06174	1.51072	0.479465	0.377908	0.431406	9.62329e-09	-1.71147	down
MruG001419		3.57689	2.66603	2.0171	0.62535	0.743619	0.581586	0.000504275	-1.51656	down
MruG001416		0.140582	0.177854	0.139906	2.44884	1.4953	1.4646	7.77069e-11	2.66845	up
MruG004427		3.27312	3.02775	3.14873	0.488727	0.763557	0.510845	1.77851e-14	-2.14565	down
MruG034225		13.6446	15.9409	14.2598	4.67945	3.69037	3.9944	1.07424e-15	-1.68	down
MruG031497		1.24677	0.494246	0.717093	0.063785	0.089159	0.28586	0.000199705	-1.70751	down
MruG031498		1.69535	0.591568	0.841095	0.244212	0.104641	0.234386	2.21987e-05	-1.78477	down
MruG047662		3.51434	4.2767	5.04848	11.7918	13.6483	10.0934	7.63825e-16	1.45602	up
MruG025607		9.84871	5.58995	7.91189	3.06603	4.02446	3.74668	9.57727e-07	-1.01317	down
MruG030366		4.18112	2.12992	2.09522	1.28835	0.999742	0.466395	0.00592358	-1.19791	down
MruG038170		3.17148	3.16006	3.3757	6.35995	7.70536	6.81282	1.83952e-09	1.10466	up
MruG013736		15.7931	15.2487	15.4642	6.80919	6.94811	4.00072	1.66399e-06	-1.24115	down
MruG022372		80.1382	74.9961	87.7299	19.1385	26.6059	28.6257	7.08344e-33	-1.62705	down
MruG050121		4.02615	3.22474	4.49551	1.45095	1.28704	1.25816	0.00231568	-1.21336	down
MruG050120		1.39035	1.92216	1.81117	0.903827	0.384921	0.768175	0.00407515	-1.06678	down
MruG049957		17.0654	20.2663	17.1279	5.0611	4.3733	3.78683	1.95128e-27	-1.91601	down
MruG049950		0.387836	0.64817	0.359207	2.54669	1.0095	1.49893	0.000254771	1.48713	up
MruG031964		0.02907	0	0.040533	10.6917	12.6773	11.2287	1.60419e-56	5.80956	up
MruG031965		0.018961	0.022915	0	15.6618	17.6336	16.3983	4.41747e-147	7.9914	up
MruG004462		5.69238	3.18173	3.46355	2.20875	1.81792	0.773735	0.0010248	-1.1376	down
MruG017056		1.0873	1.82344	1.23055	0.567145	0.376422	0.737359	0.000305291	-1.11568	down
MruG027297		5.30469	7.20889	4.49917	13.8516	15.2173	16.9471	4.66153e-07	1.35861	up
MruG029295		12.4004	9.93108	9.05422	4.61961	3.88036	5.23023	4.26302e-09	-1.09801	down
MruG029298		5.11722	3.56249	6.85686	0.82035	0.310154	0.633078	8.53377e-10	-2.38694	down
MruG021193		6.34283	5.62061	5.84036	2.70129	1.79688	2.71724	2.16941e-06	-1.16409	down
MruG019693		0.290401	0.333782	0.838554	1.71008	1.49937	1.09921	0.00150432	1.27951	up
MruG019698		8.98157	6.88191	6.89205	4.13592	2.27962	3.60258	1.20727e-05	-1.05681	down
MruG047054		2.62418	3.14626	3.91404	8.84001	10.7171	9.88252	6.09532e-06	1.43902	up
MruG047056		18.411	18.4875	16.7788	35.4027	37.385	36.3008	2.88126e-31	1.06071	up
MruG017836		82.196	89.5276	85.5415	36.9289	36.1023	37.4304	3.34538e-71	-1.1664	down
MruG040850		3.26893	2.24215	2.42413	13.7639	12.5563	11.6373	2.79982e-63	2.2563	up
MruG040851		3.0104	3.52529	3.2058	13.4697	11.2039	12.1162	1.67726e-67	1.93551	up
MruG011861		25.4027	22.9695	24.245	4.77644	4.56623	4.01682	6.67001e-127	-2.36681	down
MruG012075		4.35254	3.53627	4.64737	1.38366	1.02363	0.711801	8.39381e-07	-1.66988	down
MruG004242		6.49575	4.29144	3.43208	0	0	0	4.03166e-13	-3.43823	down
MruG038376		1.02189	1.20553	0.422444	3.25834	3.72292	5.18069	0.000402786	1.6072	up
MruG038377		9.04806	9.02533	8.07657	0.894212	0.503316	0.582865	1.11253e-68	-3.46173	down
MruG047191		0.138314	0.177547	0.043334	0.459604	0.467113	0.33407	0.00232483	1.38394	up
MruG011524		0.751305	0.717706	0.809814	2.67895	1.99547	3.28904	0.00103049	1.4073	up
MruG038996		14.1014	14.5257	13.7418	32.8251	29.9442	25.4067	3.25811e-22	1.08932	up
MruG001594		9.74993	10.0451	7.75456	0	0	0	2.41356e-48	-5.79933	down
MruG006489		0.966542	1.17862	1.81023	0.229556	0.072836	0	2.52177e-07	-2.38127	down
MruG048146		7.42771	5.75967	7.1898	2.7803	3.287	2.72319	0.000120889	-1.06577	down
MruG027905		7.10617	6.28851	6.51891	0.627387	1.36029	0.901202	7.94943e-14	-2.39503	down
MruG027904		8.84311	5.10767	6.04851	0.964394	1.37995	1.51588	6.64119e-17	-2.15425	down
MruG003999		34.2294	31.9713	31.5359	10.0525	8.63129	9.32769	2.10422e-89	-1.73761	down
MruG003990		16.5577	15.4634	15.8394	2.38221	2.13372	2.97805	1.52186e-83	-2.57162	down
MruG003669		5.17648	5.62822	5.38891	2.33864	1.83541	2.07527	4.10018e-08	-1.24275	down
MruG049361		4.39456	4.15946	4.44638	0.666725	0.118497	0.834477	1.9661e-11	-2.42925	down
MruG041170		8.51784	8.15409	8.84154	1.2351	0.499033	2.43776	4.35184e-05	-1.84819	down
MruG046782		6.19042	4.91042	6.47372	0.223524	0.187404	0.298623	3.63601e-30	-3.82606	down
MruG046780		4.75516	3.11559	4.11169	0.316579	0.820898	0.537808	1.10501e-13	-2.42881	down
MruG024760		8.8907	8.97376	6.38994	3.61288	2.73476	3.13549	1.73723e-07	-1.22297	down
MruG034501		1.12533	1.43656	0.829629	0.192236	0.311028	0.109372	0.00011383	-1.73158	down
MruG034509		1.50114	1.44408	1.77651	30.9412	29.5689	28.2858	1.24759e-243	4.19352	up
MruG006906		3.00178	5.78308	6.41918	1.41876	0.896228	1.45214	6.80811e-07	-1.68005	down
MruG025412		2.44589	3.34503	2.75183	0	0	0	1.01622e-18	-4.0111	down
MruG025414		8.12259	7.14149	7.60628	2.5076	2.17487	3.02303	1.9364e-11	-1.44192	down
MruG012747		4.28196	4.46924	4.04586	2.12154	2.09364	1.72209	7.02116e-13	-1.03489	down
MruG036018		1.72657	2.21935	1.20867	0.601949	0.466296	0.043425	0.00054032	-1.56256	down
MruG036013		0.231141	0.219939	0.179948	0.682947	0.372662	0.610126	0.00436745	1.16432	up
MruG036016		0.172963	0.101428	0.088381	0.339246	0.282475	0.366674	0.00805462	1.1439	up
MruG023922		0.792267	1.40251	0.968513	5.08934	5.62371	6.10922	4.71331e-12	2.13957	up
MruG020691		5.13021	5.57707	3.37419	2.28002	1.82356	2.15312	2.05413e-05	-1.04438	down
MruG029314		16.6105	16.3752	12.7375	7.02365	7.42721	6.50051	4.54757e-19	-1.05999	down
MruG029315		12.8313	10.9928	14.3786	1.71771	2.13907	2.2653	1.45424e-38	-2.48749	down
MruG029319		24.9559	28.5324	26.9617	0.957101	0.754501	0.815714	2.06716e-221	-4.78153	down
MruG019081		21.9258	19.2848	19.6437	5.23792	5.62399	4.75733	2.74555e-61	-1.88701	down
MruG019089		12.5671	13.3182	12.6792	4.81327	7.0769	6.14039	2.19886e-08	-1.01486	down
MruG018357		414.552	402.868	395.314	764.408	810.629	860.082	3.25458e-68	1.05014	up
MruG015884		3.41708	2.77591	2.18543	0.839024	0.807526	1.20923	1.63895e-06	-1.36577	down
MruG009618		1.37112	0.743928	0.819889	2.86151	1.85532	3.03072	0.000116657	1.25966	up
MruG041376		1.43145	0.687217	1.33256	2.83671	3.31449	2.78831	0.00845805	1.11313	up
MruG041374		0.083008	0.361574	0.318012	3.93621	2.10975	2.45446	3.864e-17	2.90439	up
MruG041371		5.57437	8.13578	6.74386	2.06239	2.14314	0.822123	2.21247e-05	-1.62049	down
MruG047233		12.5885	11.8297	8.14517	0.321786	0.220943	0.532151	4.27479e-30	-3.96175	down
MruG007929		13.4209	13.2355	13.5243	5.36886	5.15229	3.43922	3.63275e-12	-1.40232	down
MruG022520		16.3106	16.9088	16.7173	5.02403	5.95907	5.53336	1.97825e-26	-1.51692	down
MruG005921		5.46274	5.83172	5.45256	2.20005	1.8519	2.12424	8.40453e-13	-1.33695	down
MruG045028		0.832573	0.644585	1.66102	2.6111	2.22372	2.50829	0.00977115	1.02524	up
MruG045029		0.917265	1.48572	1.40643	3.37409	4.39358	4.07987	8.30535e-07	1.48556	up
MruG049505		2.04538	1.14308	2.8052	4.78263	6.84145	4.10972	0.0020873	1.17446	up
MruG049501		13.0135	17.7863	14.8221	5.80194	6.96595	4.41954	9.86641e-05	-1.20695	down
MruG017914		4.73016	7.52294	4.71796	1.50648	0	1.72107	0.00174596	-1.51569	down
MruG027260		38.0043	34.7211	37.4262	14.2421	13.5461	13.5818	1.4373e-59	-1.35448	down
MruG027262		2.73387	3.09195	3.2187	1.20041	1.2916	1.03573	8.81272e-05	-1.18233	down
MruG032952		4.60772	3.04801	3.38302	0.751871	0.71898	1.10884	8.83458e-08	-1.77518	down
MruG040101		6.56875	4.87281	4.98246	10.4536	13.5854	16.8423	5.5706e-06	1.24691	up
MruG006364		6.58724	6.22414	6.50266	0.894912	0.650743	0.796182	3.06198e-84	-2.90104	down
MruG021146		1.2058	1.01344	1.02999	0.212479	0.377642	0.278706	2.01792e-07	-1.63591	down
MruG019243		9.1325	7.98283	9.3559	3.13015	3.23911	3.49498	5.8224e-17	-1.33833	down
MruG025338		6.10773	8.40647	8.79153	21.1817	18.9986	19.642	9.46806e-20	1.36984	up
MruG025331		80.4058	84.4565	79.7867	0.209777	0.170685	0	1.90816e-193	-7.97797	down
MruG037975		645.907	661.153	663.009	1269.25	1275.98	1326.04	6.42589e-92	1.01954	up
MruG047570		24.2414	25.9663	21.3069	10.8819	11.085	10.7746	2.80207e-21	-1.06426	down
MruG022647		10.3358	8.66706	9.10358	16.5128	20.4723	21.0241	3.45864e-08	1.04894	up
MruG032391		5.59605	5.20195	5.71254	1.1587	0.84384	1.14315	5.48071e-34	-2.23876	down
MruG011102		85.7932	86.9873	96.1248	175.24	189.874	196.75	2.7686e-44	1.1027	up
MruG032028		0.627391	0.925406	0.635017	2.24204	2.04082	2.02296	1.84564e-11	1.48641	up
MruG032020		27.7295	30.3817	28.3988	11.0058	13.9255	12.1489	3.28817e-07	-1.11401	down
MruG036731		68.2678	66.7678	65.9734	122.683	132.613	143.043	6.60587e-31	1.02485	up
MruG014912		111.483	112.88	110.831	20.5077	21.519	43.8067	5.33212e-07	-1.67191	down
MruG017303		0.709638	0.236172	0	3.13344	1.72567	2.10822	0.000184188	1.81911	up
MruG035551		1.3772	1.45019	2.42226	0.584461	0.632803	0.623095	0.000227375	-1.25963	down
MruG035550		13.6419	15.1913	11.6131	25.6648	26.0622	29.8772	1.38783e-19	1.04593	up
MruG027761		2.55142	1.9285	2.23958	0.296743	0.133464	0.427933	3.85797e-11	-2.40041	down
MruG023688		9.40558	7.30421	14.3221	2.67734	4.71131	4.37584	0.00210985	-1.1506	down
MruG042332		645.071	659.403	677.484	132.759	177.046	191.237	3.03029e-66	-1.90934	down
MruG032470		3.8155	4.26265	2.88928	18.9732	18.0306	20.3303	1.44982e-60	2.37783	up
MruG038891		0.148813	0.048157	0.333787	0.765714	0.537724	0.898396	0.000808902	1.49744	up
MruG001325		2.31593	1.96335	1.65989	3.50533	4.15241	4.9832	2.58111e-05	1.05768	up
MruG044599		0.616481	0.596424	0.388112	3.38223	3.33481	4.57071	2.09085e-09	2.25432	up
MruG001497		12.9101	12.8879	13.8	6.01798	5.24547	5.5628	2.55478e-36	-1.17448	down
MruG001499		10.4521	9.96814	8.61162	3.80775	3.19869	2.83258	8.55931e-32	-1.4808	down
MruG009860		5.6387	8.03966	8.61675	3.8041	1.06954	2.05992	5.43026e-05	-1.40338	down
MruG014491		9.4101	5.75191	6.99449	0.525204	0.036732	0.111732	5.97538e-19	-3.54532	down
MruG014493		9.43698	10.082	8.24831	0.360346	0.524589	0.217187	2.5592e-78	-4.28813	down
MruG014492		7.05044	7.0914	6.33031	0.4042	0.569858	0.218425	4.30531e-82	-3.85112	down
MruG003234		1.33881	1.70416	1.43635	0.428542	0.089668	0.347754	0.000122772	-1.67274	down
MruG003233		1.08455	1.02006	0.762845	2.46842	3.21355	3.46397	8.82066e-07	1.51861	up
MruG006776		6.6129	6.28144	6.86144	16.0069	12.671	13.8065	1.37354e-11	1.11648	up
MruG030678		16.8336	21.8619	22.507	7.55751	9.10022	11.4235	2.56222e-06	-1.02766	down
MruG030672		80.8445	73.5089	75.6119	0.804622	0.607867	0.43374	3.18539e-287	-6.56339	down
MruG038467		0	0	0	3.50538	2.96505	2.68968	4.42551e-14	3.53478	up
MruG039743		2.64706	2.71978	3.49667	7.1933	7.84605	6.24669	3.4732e-08	1.23648	up
MruG039749		9.12616	7.39794	6.36132	0	0	0	1.63521e-13	-3.48035	down
MruG022481		9.69221	9.8838	9.26971	3.23637	3.59991	4.07366	6.85484e-21	-1.32685	down
MruG007421		4.55746	3.8867	3.48016	10.2694	9.30668	8.03525	2.94011e-20	1.23543	up
MruG007422		2.03147	2.5052	2.58421	5.95407	5.13766	5.87218	2.94348e-05	1.18172	up
MruG007423		0.392421	0.428292	0.310111	2.08858	2.05367	1.9667	2.74181e-25	2.32482	up
MruG036538		4.48943	5.89331	4.8219	14.1875	11.5731	11.6553	3.90034e-25	1.32135	up
MruG009257		15.7236	18.8455	19.7613	6.46314	3.65438	6.04597	7.73088e-09	-1.55186	down
MruG041377		0.987155	0.345228	0.83307	1.98981	2.18808	2.16151	0.00351816	1.23544	up
MruG011677		0	0	0	8.02369	8.70205	9.44035	1.32238e-95	7.40868	up
MruG021115		2.59293	3.1358	2.77166	1.29066	0.719605	1.2906	7.55766e-06	-1.20259	down
MruG045404		1.31451	1.39721	1.60081	0.178464	0.543222	0.248197	4.73895e-05	-1.65792	down
MruG045407		6.74004	5.3442	4.66923	0.943089	0.578579	1.18464	1.06707e-18	-2.34882	down
MruG046019		0.347083	0.234298	0.115978	1.07042	0.861904	1.0607	5.35728e-08	1.83369	up
MruG046016		2.08625	1.77313	1.70372	0.842107	0.088641	0.735162	0.00104553	-1.33975	down
MruG021966		72.8506	71.9317	70.8216	0	0.083517	0	3.89928e-200	-9.07607	down
MruG021962		2.35679	2.05357	1.61081	0	0	0	1.51786e-14	-3.5979	down
MruG028176		8.33083	8.7007	6.61505	4.07307	2.99458	3.4864	1.84127e-08	-1.06816	down
MruG029806		17.6973	17.6037	16.7575	0	0	0	1.10491e-70	-6.64499	down
MruG029805		2.60227	2.42436	2.76949	5.20976	5.60637	6.04477	4.23336e-05	1.07192	up
MruG018926		0.986863	0.78924	0.977923	8.39957	6.75551	6.73017	6.67105e-76	2.9429	up
MruG038916		4.15068	6.89055	5.93011	0.720823	0.337907	0.417026	3.47414e-09	-2.4687	down
MruG006151		0.286392	0.355089	0.14511	1.77096	1.27389	1.66838	2.79141e-07	2.04825	up
MruG030856		1.83382	2.23406	1.77154	0.431434	0.473202	0.89834	0.000184823	-1.38693	down
MruG020298		1.38054	1.37774	1.81489	0.784479	0.399604	0.424257	0.000237068	-1.24475	down
MruG044364		2.18398	1.61678	1.63348	0.029611	0.107941	0.005586	2.5585e-10	-2.9079	down
MruG030584		0.831901	0.445939	0.440076	1.28273	1.28814	1.26044	0.0050164	1.02963	up
MruG007209		29.8222	30.6409	28.3565	10.073	9.52966	10.162	2.96942e-65	-1.51505	down
MruG045705		0.225634	0.506216	0.217963	1.03075	1.06581	1.16466	3.17279e-05	1.53009	up
MruG039274		0.332543	0.124783	0.48538	1.01971	0.775682	0.993571	0.00672532	1.19903	up
MruG039278		3.88416	4.41964	4.39252	12.6974	10.652	7.77873	6.09172e-10	1.27504	up
MruG039279		2.89776	3.01022	2.70435	6.41934	7.62863	7.80552	1.95599e-10	1.3186	up
MruG005024		28.3727	31.8617	28.2926	14.4183	9.68325	11.1851	1.41234e-29	-1.26168	down
MruG006635		20.0148	17.4085	17.2962	47.0463	32.936	37.1343	3.89694e-23	1.12736	up
MruG039180		2.24158	2.63888	2.67246	1.41177	1.1171	0.871129	1.43634e-09	-1.06311	down
MruG005022		0.098482	0	0.26021	1.46198	1.3775	1.10316	1.0264e-05	2.10264	up
MruG047701		137.436	140.216	154.783	47.0661	51.0217	53.2115	2.35868e-55	-1.45571	down
MruG030008		1.31316	1.21131	1.25241	2.71389	2.98387	2.8813	0.000407808	1.09033	up
MruG007393		24.347	22.8401	24.0375	0.360603	0.388659	0.311772	6.60401e-194	-5.71862	down
MruG022143		83.2579	81.5654	82.8535	186.433	173.261	170.515	1.25343e-104	1.14177	up
MruG031841		28.9506	27.3041	27.0333	4.82599	4.79965	4.75579	1.14984e-125	-2.45532	down
MruG031847		9.5144	10.7391	10.6623	25.6863	22.9861	25.6813	4.24693e-38	1.29814	up
MruG031844		184.972	187.48	179.388	8.22957	7.88541	8.43858	0	-4.41881	down
MruG027533		0.397525	0.417567	0.436699	1.23626	1.38349	1.11253	7.1177e-07	1.44496	up
MruG020164		6.46368	5.50793	5.30665	1.93289	2.0314	2.16134	2.36668e-08	-1.35206	down
MruG024844		3.15414	1.93409	2.7533	0	0.147377	0.14906	3.62969e-19	-3.55364	down
MruG027102		1.34526	1.80272	1.83136	4.83795	2.73969	3.78939	0.000211947	1.11332	up
MruG037871		8.69867	13.4402	10.1827	23.7623	23.2656	28.7634	6.43337e-14	1.23805	up
MruG037738		2.43756	2.16283	1.94949	0.83082	0.863302	1.16772	0.00019088	-1.0546	down
MruG011727		1.32835	1.22461	1.03079	3.34763	3.54085	3.78362	7.41061e-08	1.47637	up
MruG008056		7.85678	7.55451	7.75498	3.69218	2.96917	3.24579	1.38047e-14	-1.14567	down
MruG010184		4.18989	3.78356	4.65164	15.5579	18.9474	18.7666	4.552e-46	2.06818	up
MruG004015		4.09547	5.18803	5.55905	1.04118	0.661624	2.07108	6.85378e-06	-1.63214	down
MruG014600		1.97761	2.97048	2.87598	1.15063	0.827304	1.19445	4.5778e-06	-1.1622	down
MruG014602		3.37571	3.90587	3.20394	0.902912	0.507258	0.569108	1.49987e-13	-2.0914	down
MruG014603		7.16119	6.20475	6.81827	3.01874	3.14689	3.35191	3.41085e-14	-1.01815	down
MruG014604		1133.69	1124.29	1153.92	29.1291	27.2557	34.5369	0	-5.15205	down
MruG016939		2.87511	2.15413	2.4057	5.16842	5.37344	4.42108	9.08767e-08	1.01517	up
MruG016930		1.59859	1.45839	1.58895	3.75046	3.30519	2.60473	0.000185207	1.01145	up
MruG023371		29.6578	30.6295	31.1686	7.80852	7.55536	5.80315	5.13573e-60	-2.02363	down
MruG023825		21.4263	21.416	20.1165	3.55074	2.92339	3.25583	7.53666e-125	-2.60148	down
MruG010053		0.146766	0.099915	0.138557	1.28226	2.13562	1.39765	1.58676e-11	2.68181	up
MruG012131		5.34419	5.28445	6.29468	15.5131	15.9868	14.0153	5.75864e-12	1.40235	up
MruG045195		2.29772	2.36425	1.81543	1.08625	0.868186	0.935677	5.95654e-08	-1.0624	down
MruG011449		0.907025	1.45814	1.24798	0.298862	0.223331	0.276442	4.61654e-06	-1.72155	down
MruG011443		12.7726	12.0339	12.4743	4.66475	5.45381	5.87049	2.17854e-16	-1.15256	down
MruG005891		7.87419	7.95089	7.50092	2.47933	2.24162	2.33847	1.69575e-36	-1.63969	down
MruG049588		0.964494	0.496007	0.161954	3.38713	2.64179	4.7182	1.21121e-05	1.94698	up
MruG000553		12.4153	8.59789	12.0347	33.4585	28.0868	26.4122	5.10375e-26	1.42811	up
MruG026933		0.38279	0.811529	0.496584	2.67836	3.06903	3.10694	1.64379e-14	2.1833	up
MruG026939		1.12461	1.49741	1.8341	0.172105	0.179994	0.463577	0.000112977	-1.70044	down
MruG040185		1.49235	2.6452	2.33085	0	0.03758	0.030009	1.28599e-16	-3.71517	down
MruG039025		1.8065	1.75181	2.24465	6.86648	4.77085	6.71637	3.10355e-13	1.60951	up
MruG041635		1.62777	1.56583	1.13188	0	0	0	3.0005e-12	-3.32715	down
MruG032315		1.54146	1.88623	2.03393	2.71677	3.84324	5.85371	0.000101841	1.11176	up
MruG038774		4.74798	4.89918	6.61163	1.61761	1.32111	2.1853	5.11978e-09	-1.49881	down
MruG006867		3.41564	3.18102	2.60515	0.40787	0.504273	0.571482	3.14796e-07	-2.02031	down
MruG025510		164.023	155.207	154.994	290.492	315.775	321.545	3.58262e-56	1.01225	up
MruG037249		0.167655	0.047428	0	1.24356	1.55699	0.979786	9.48865e-09	2.63499	up
MruG036110		47.7988	50.7242	47.4457	120.074	114.157	120.073	1.30903e-102	1.3212	up
MruG036113		115.928	118.083	120.729	52.6768	48.9328	51.9755	9.63257e-84	-1.15553	down
MruG026093		2.26959	2.39386	2.58987	1.2257	0.71833	1.20072	2.4562e-06	-1.08383	down
MruG033542		14.3338	16.7501	17.5927	7.32555	5.11997	5.28564	2.46103e-09	-1.32392	down
MruG048835		7.543	7.24482	6.90105	18.373	14.6219	12.3509	3.26451e-10	1.07459	up
MruG050052		0.68122	0.536043	0.684898	2.9415	3.02238	2.64767	6.38369e-14	2.01995	up
MruG023607		17.362	15.9881	16.1811	7.04886	6.44003	6.11447	4.15657e-52	-1.27789	down
MruG028729		15.2412	16.0465	16.8075	37.205	33.449	34.7601	2.68219e-33	1.16619	up
MruG020553		9.90764	11.0335	8.84519	41.3813	40.843	38.1643	3.82921e-92	2.03968	up
MruG021600		0.409614	0.577068	0.552659	1.92496	1.31831	1.28079	2.23887e-05	1.39257	up
MruG019458		19.2871	20.1347	18.6382	40.8677	34.6639	37.9524	6.38395e-31	1.00589	up
MruG019459		0.11626	0.212353	0.080785	0.501519	0.293303	0.402384	0.00504312	1.22183	up
MruG045251		2.52565	3.18385	2.37055	1.05183	1.03518	1.0726	1.07354e-06	-1.21739	down
MruG005665		1.14192	0.986342	1.11626	0	0	0	4.85548e-30	-4.84547	down
MruG003542		1.95682	3.19386	2.02804	4.04567	5.50265	5.45028	4.26755e-07	1.05964	up
MruG003540		4.71418	2.51974	3.76502	7.98146	8.05275	6.61414	1.35706e-05	1.02139	up
MruG003545		37.1804	34.6882	37.0359	74.0593	76.7143	79.4393	1.84423e-42	1.11785	up
MruG041035		3.54532	5.84217	3.86592	0.402927	0.27531	0.122732	1.07494e-12	-2.91562	down
MruG041033		6.10788	4.97753	4.07952	2.13267	1.86828	1.565	9.38877e-07	-1.28243	down
MruG004718		7.04221	5.22944	4.25496	12.0422	12.4666	16.5172	4.94495e-09	1.28528	up
MruG043309		1.09758	1.13172	1.74069	4.57531	3.69752	3.35024	2.47641e-05	1.39595	up
MruG045362		4.95766	5.03877	4.85718	0.169033	0.410442	0	4.23017e-22	-3.63004	down
MruG044653		8.31868	9.42688	8.59845	0.241353	0	0.700628	5.39459e-13	-3.1325	down
MruG030205		2.07027	1.53781	1.86006	0.391206	0.514171	0.310978	9.16206e-11	-1.90406	down
MruG026873		4.85427	3.92901	3.62021	1.28563	1.64739	1.84786	0.00148927	-1.13381	down
MruG026874		21.099	21.5626	21.8252	66.5959	53.1607	52.2076	7.09486e-56	1.44738	up
MruG040024		0.885936	1.23042	0.614162	0.12716	0.14501	0.154175	8.20092e-07	-2.01592	down
MruG031348		22.9497	26.5504	23.0669	49.7253	50.1856	51.7106	5.1406e-16	1.08799	up
MruG006242		5.64117	5.38743	6.15935	0.072988	0	0	1.22188e-49	-5.48749	down
MruG025281		4.52358	4.06431	3.85221	42.2146	37.1174	37.508	5.75287e-46	3.07715	up
MruG027327		1.35653	1.32378	1.84411	0.661449	0.618392	0.191084	4.05222e-05	-1.37298	down
MruG032022		35.881	30.1813	38.2375	9.9187	9.15906	11.6886	8.08615e-14	-1.62237	down
MruG002016		1.16938	1.09837	1.38744	3.84959	2.58001	3.30727	0.000637187	1.24277	up
MruG026687		15.6861	14.5991	13.9257	31.4436	34.3404	34.3522	4.16115e-37	1.21443	up
MruG026686		2.93059	2.02063	2.56691	7.16939	8.83457	7.85365	1.74338e-18	1.64283	up
MruG027156		3.98957	3.78177	2.68089	0.208465	0.538279	0.28862	4.71487e-14	-2.71285	down
MruG027155		4.07747	5.7515	4.34853	2.1093	0.645377	0.77747	3.72492e-05	-1.57634	down
MruG029228		6.09993	8.27592	6.64	3.22727	3.05204	2.71994	0.000350775	-1.05761	down
MruG019646		0.095021	0.081112	0.476101	0.833017	0.787346	0.974337	0.00202826	1.43318	up
MruG004073		0	0	0	6.35613	5.91595	7.29804	4.19397e-21	4.19927	up
MruG005037		6.55719	6.22036	6.24112	2.03009	1.2186	0.904464	3.85894e-11	-1.90872	down
MruG000770		23.3199	25.3063	17.7471	8.88592	7.20078	8.34772	4.92585e-09	-1.31013	down
MruG040551		1.91236	1.41559	0.905783	3.03341	4.97246	3.40111	0.00392299	1.16994	up
MruG001822		3.87339	4.25565	4.42382	10.1496	11.6216	11.795	3.22108e-12	1.39594	up
MruG001823		14.8478	15.5708	15.8081	38.686	50.0425	36.7404	2.73913e-20	1.44656	up
MruG001820		28.0095	27.1809	27.4179	92.9934	90.0436	88.9919	5.5818e-174	1.7589	up
MruG001821		6.40696	7.43244	6.40842	19.6162	21.1487	22.2244	1.91343e-32	1.64659	up
MruG030739		1.21172	1.06731	0.722742	4.18159	3.86326	3.98415	1.35269e-07	1.75898	up
MruG037476		302.103	316.716	306.69	2.96265	4.09148	3.6262	0	-6.32188	down
MruG001014		10.4999	10.184	9.26052	35.0427	30.318	33.0892	1.78995e-58	1.74143	up
MruG001018		73.8117	71.5804	78.3493	300.98	287.374	295.238	3.97261e-263	2.02051	up
MruG047971		10.8165	12.0157	9.88584	4.24239	4.32449	4.87789	9.6742e-13	-1.1972	down
MruG008504		0.370708	0.334137	0.451935	0	0	0	2.27807e-11	-3.21178	down
MruG025201		5.96545	3.82981	4.44673	0.271436	0.733645	0.476827	6.87615e-10	-2.47549	down
MruG025202		0.360068	0.256146	0.050611	4.18471	4.81204	4.21395	4.3478e-27	3.63172	up
MruG018428		0.95361	1.10533	1.00657	0.34541	0.361959	0.27476	0.000135299	-1.36029	down
MruG034600		1.72649	1.91321	1.46271	0.236534	0.274626	0.314132	1.79588e-10	-2.18424	down
MruG034605		7.87366	8.66682	7.75695	4.116	3.4452	3.40629	6.70026e-11	-1.06378	down
MruG037557		0.183206	0.640288	0.414198	3.03323	2.74866	2.69836	3.2254e-11	2.345	up
MruG042993		14.1875	15.2575	17.5092	7.2165	7.21989	7.45942	1.36122e-11	-1.02802	down
MruG047740		26.3561	29.7919	27.637	10.8038	13.1848	11.755	3.29627e-07	-1.12335	down
MruG033926		0.555833	0.534382	0.536366	0.008678	0	0.011908	2.03386e-12	-3.23035	down
MruG029698		2.1891	2.38957	2.42085	5.69313	4.49758	4.49913	5.33996e-09	1.07356	up
MruG029690		1.91711	1.26464	1.70048	14.5001	13.5621	15.7613	4.51601e-73	3.09152	up
MruG018819		3.07206	2.84698	4.11448	1.39516	1.16453	1.29998	0.00287746	-1.12646	down
MruG024289		7.10121	6.3004	8.01798	1.45375	1.46719	1.75754	9.87977e-25	-2.0445	down
MruG010716		233.863	238.6	263.985	85.8542	121.362	123.194	6.13818e-18	-1.089	down
MruG002834		15.6896	13.9037	14.8213	4.33132	2.96746	3.5145	1.64815e-42	-1.93815	down
MruG044869		5.19992	4.80075	5.14385	13.6826	11.8495	12.9233	9.13211e-14	1.33757	up
MruG000227		7.37132	5.57877	6.08332	2.04625	2.35328	2.25796	6.71282e-16	-1.41945	down
MruG044286		70.684	71.3099	70.3221	136.43	136.713	144.97	2.06993e-75	1.02184	up
MruG001257		5.18161	4.26431	4.73576	0.344756	0.632126	0.519086	7.93961e-36	-2.98013	down
MruG004557		3.43845	3.61702	4.19896	11.9025	12.1192	11.8576	2.36261e-25	1.66327	up
MruG012403		0.688119	0.451304	0.51724	0.12979	0.046814	0.049515	1.40666e-06	-2.0462	down
MruG041501		17.9159	22.716	18.4566	117.067	137.08	135.192	3.01059e-125	2.72542	up
MruG038673		9.70006	10.5233	8.58552	21.6432	20.1674	19.0902	2.31596e-18	1.10923	up
MruG042856		0.84634	0.944286	0.912969	2.31532	2.00879	2.66296	5.60936e-06	1.28494	up
MruG042857		1.75346	2.17429	1.72355	5.67176	4.65681	5.36568	8.34276e-13	1.44992	up
MruG042858		0.942021	1.8338	1.06295	4.80476	4.28285	4.47489	6.73191e-12	1.72754	up
MruG025041		0.968477	1.33945	1.04425	2.08912	2.88524	3.03569	0.000801753	1.12893	up
MruG037712		86.8061	88.3614	84.7692	168.008	170.674	174.167	8.96383e-72	1.02457	up
MruG035625		89.1882	99.4047	88.3805	37.7356	35.5733	39.795	5.24705e-30	-1.22797	down
MruG026766		4.5593	4.84301	4.69532	1.28823	0.954865	1.61455	1.56819e-20	-1.74283	down
MruG034971		58.1716	61.94	61.1695	8.63886	8.07623	7.25401	1.15509e-222	-2.84186	down
MruG025458		0.114026	0.130454	0.305498	2.82171	2.73673	2.07903	2.15135e-08	2.48548	up
MruG016386		6.08881	6.95059	6.65731	0.082874	0	0	4.80008e-56	-5.6503	down
MruG016385		7.25999	7.51938	6.16235	0	0.088973	0	5.79159e-19	-3.96767	down
MruG018499		5.81253	4.88085	6.52761	11.0904	11.2658	15.9256	1.32576e-06	1.11979	up
MruG033341		1.49698	0.688179	0.738019	0.238562	0.302975	0.175229	0.000385855	-1.51133	down
MruG033929		1.01593	0.577883	0.69817	0.250326	0.162526	0.2733	4.08702e-06	-1.48821	down
MruG014260		4.34693	5.423	4.91011	2.21372	1.95396	2.05668	5.91538e-14	-1.15671	down
MruG040922		9.43969	6.8134	6.97835	21.9657	19.9427	20.1788	3.17972e-14	1.40758	up
MruG040925		1.76305	3.48098	3.61378	9.65677	5.29599	6.84542	0.000893707	1.15483	up
MruG040929		0.829165	0.773513	0.863453	2.59967	2.18686	1.86226	3.14243e-10	1.39499	up
MruG039888		4.76441	5.57951	7.02476	0	0	0	1.78794e-28	-4.7554	down
MruG004370		9.79682	9.98696	10.9695	5.00144	4.19784	5.21922	1.03181e-19	-1.03009	down
MruG004379		1.06408	0.767635	1.38338	0.332437	0.47449	0.332301	0.0092858	-1.12582	down
MruG038824		0.363193	0.541631	0.233216	1.00863	0.900224	1.56249	0.00650262	1.22192	up
MruG005424		5.80601	6.08961	5.95057	1.97895	2.22809	1.61379	2.66906e-10	-1.47146	down
MruG024712		11.9199	12.7543	12.3539	3.42519	3.39848	2.71556	1.03424e-20	-1.82116	down
MruG024714		7.92874	7.37262	9.44833	0.666479	1.34237	1.51967	1.16018e-15	-2.44124	down
MruG021269		35.7272	44.1455	45.6994	1.0193	0.501784	1.04788	2.61134e-81	-4.97238	down
MruG001426		1.05557	0.79481	1.30697	2.35593	2.50314	2.27116	3.833e-05	1.10883	up
MruG001425		0.065863	0.255282	0.178934	2.85262	2.97347	3.36879	2.02366e-19	3.31435	up
MruG001429		1.12142	1.27796	1.0201	3.6838	2.28291	2.8021	0.00528596	1.13225	up
MruG022713		136.921	151.006	147.679	61.9204	71.4085	71.6458	3.5414e-29	-1.03101	down
MruG024299		49.9396	51.5164	49.0534	8.76282	8.85949	10.487	3.98153e-145	-2.35201	down
MruG046547		7.06342	6.41875	11.1046	3.61372	4.83671	2.25515	0.000221152	-1.05319	down
MruG049295		5.57381	7.10568	6.54748	1.79911	1.59998	1.52568	1.94238e-30	-1.8541	down
MruG049296		3.57839	2.73915	4.05318	0.356097	1.07286	0.990391	0.000304034	-1.54367	down
MruG031191		12.5858	10.8886	12.3246	35.9928	31.1006	37.2526	1.29693e-18	1.5326	up
MruG031443		13.5826	13.4008	14.0382	6.97607	6.73922	5.44365	7.85516e-15	-1.03031	down
MruG030314		1.53222	1.55992	1.50496	6.27253	3.81638	3.44757	1.79279e-07	1.45761	up
MruG027688		0.719665	0.598788	0.888998	2.3319	1.45451	1.76346	0.00015884	1.22387	up
MruG050153		15.661	14.837	15.133	3.73299	5.14774	3.89501	2.8795e-20	-1.72009	down
MruG005376		2.54654	3.35147	2.80569	7.8108	5.72479	8.37373	6.30757e-09	1.30272	up
MruG023724		1.57195	2.95859	2.18913	4.64862	4.9154	6.94703	3.85145e-07	1.255	up
MruG028607		9.69012	11.946	10.2143	29.6968	24.2298	26.8945	2.90337e-30	1.36873	up
MruG023890		2.4361	2.89081	2.66576	0.100192	0	0	3.15828e-09	-2.85475	down
MruG023897		2.33567	2.74713	2.89263	0.753074	1.11668	0.450854	2.30991e-05	-1.4892	down
MruG017086		7.41238	6.2526	7.64023	3.02543	2.11755	3.07365	3.77554e-11	-1.2706	down
MruG012564		0.047535	0.174927	0.114949	1.66892	2.33596	1.51623	2.02556e-21	3.31275	up
MruG012563		0.171408	0.231003	0.180119	1.92171	1.69907	1.7658	8.44255e-13	2.60206	up
MruG012568		2.82226	4.00541	2.80567	0.0726	0.119575	0.131411	3.42722e-43	-4.20811	down
MruG021498		6.66594	7.9951	9.10811	38.4386	41.8468	43.0451	4.01429e-34	2.30836	up
MruG044415		2.81978	3.80822	3.62676	0.88682	1.96256	1.3725	0.000335368	-1.11546	down
MruG013760		507.388	536.411	521.387	232.157	220.187	220.582	9.60508e-113	-1.16661	down
MruG008293		12.3885	14.8964	14.7705	32.073	28.3919	34.0962	5.23621e-26	1.19761	up
MruG008291		10.0282	9.72323	8.02548	3.47497	3.76054	5.31295	1.3862e-07	-1.05331	down
MruG008296		1.80981	0.936617	0.796544	0.25817	0.34777	0.550218	0.00853774	-1.18149	down
MruG008294		11.5476	18.171	18.3977	4.6184	4.61577	5.56839	2.60625e-17	-1.58909	down
MruG005742		11.8272	11.696	11.8794	4.59679	3.86651	4.26543	7.30888e-23	-1.39444	down
MruG017866		0.673977	1.07375	0.888915	1.73359	1.54526	2.20562	7.46819e-05	1.02146	up
MruG010074		0.385689	0.437812	0.532176	0	0	0	1.18779e-12	-3.37711	down
MruG011854		14.0429	14.5399	15.2115	34.7232	32.7361	35.0192	4.48345e-59	1.26447	up
MruG041825		2.75986	2.55396	2.25135	0.82658	0.82746	0.91185	1.79465e-14	-1.44771	down
MruG012006		2.72085	3.89684	4.39908	0.395661	1.33644	0.469376	1.51203e-06	-1.86294	down
MruG027897		40.1604	38.7688	37.5729	114.094	120.676	127.147	6.58554e-137	1.67488	up
MruG000946		0.167405	0.128875	0.131712	0.702499	0.532279	0.565056	8.08653e-06	1.72205	up
MruG031670		7.3479	9.43283	8.59855	0.85186	0.63737	1.16744	1.44306e-39	-2.99187	down
MruG006473		20.7865	18.098	19.8937	53.627	51.9693	56.2447	2.22695e-50	1.48965	up
MruG030572		28.3785	29.7096	30.9655	0	0	0.09308	6.41954e-67	-6.28837	down
MruG040695		0.104951	0.259566	0.215537	3.88507	2.42804	2.11271	1.47813e-18	3.1687	up
MruG042079		0.985231	1.49838	1.46947	0.113889	0.044274	0.086659	1.1128e-08	-2.55377	down
MruG039158		92.6604	85.1242	88.3243	188.443	194.79	196.595	4.78681e-75	1.16614	up
MruG025287		7.91216	7.83224	9.98382	2.54861	2.03624	1.16543	6.315e-18	-1.97962	down
MruG018062		151.048	157.425	152.154	292.705	293.748	312.618	1.22549e-69	1.00892	up
MruG018063		0.967649	1.62744	0.822158	4.4096	3.37452	3.28396	1.35367e-05	1.49296	up
MruG018069		36.8686	37.2482	35.5963	80.6401	72.2346	69.0255	1.48266e-49	1.05782	up
MruG036933		2.29857	3.41491	2.58071	0.200162	0.414296	0.819212	6.07056e-06	-1.88597	down
MruG034683		6.17244	4.1633	6.01581	1.0632	0.942091	1.23923	9.89856e-12	-2.02591	down
MruG034681		2.50226	3.62389	3.38236	1.13163	1.37477	0.5701	0.00134199	-1.27587	down
MruG034684		32.7675	30.9809	30.5862	13.5163	14.933	15.0907	6.16905e-29	-1.05828	down
MruG036682		16.2004	18.8057	20.2248	3.86513	2.36385	3.65457	9.05395e-51	-2.359	down
MruG019858		2.22188	2.46775	4.64862	8.80607	10.7107	12.4265	8.70078e-10	1.65772	up
MruG019857		3.01767	2.64982	4.01495	27.7156	30.1423	34.5377	1.5234e-97	3.208	up
MruG035249		0.741623	0.611193	0.676548	1.76436	1.57525	1.4496	0.000125884	1.15498	up
MruG015025		7.63986	5.37033	5.77233	1.6137	1.86026	1.97293	1.82585e-11	-1.62073	down
MruG023914		6.93252	6.90627	5.91059	23.0735	22.1191	21.97	3.64269e-31	1.76517	up
MruG023911		6.85192	6.63725	7.92623	12.9219	19.2441	15.2345	2.18516e-05	1.09729	up
MruG028035		128.478	125.149	117.119	52.8971	58.4576	65.94	6.85776e-22	-1.00554	down
MruG021516		11.073	11.9485	11.4523	34.3576	40.8489	44.1659	1.0196e-21	1.76489	up
MruG021517		8.44733	9.56612	10.14	23.4507	31.3325	32.0121	6.82882e-14	1.58462	up
MruG012246		280.835	292.152	312.538	878.164	975.751	1031.25	3.81728e-118	1.74107	up
MruG008629		4.62163	4.55548	4.50604	1.44151	1.56218	1.85594	1.76373e-11	-1.38552	down
MruG011261		2.10057	2.85899	2.59083	1.40499	0.925445	0.614762	0.00828983	-1.06972	down
MruG019073		0.961624	1.27359	1.57569	4.25454	3.98538	3.23471	1.43365e-10	1.52882	up
MruG013684		0.024873	0.048809	0.039118	0.607555	0.619907	0.623189	7.30916e-14	2.99696	up
MruG013682		1.0061	0.805868	1.25399	0.282453	0.364923	0.277562	2.3852e-05	-1.44789	down
MruG010138		1.17321	1.2673	1.08062	4.05067	3.84492	3.59517	2.40234e-13	1.6521	up
MruG004626		5.39632	4.6463	5.49692	11.2537	11.5023	12.614	8.54579e-16	1.2013	up
MruG002706		0	0	0	1.26789	1.03432	1.43626	1.19958e-14	3.59796	up
MruG002703		2.54953	2.75586	0.875644	7.99473	8.07187	8.06335	5.81953e-06	1.66993	up
MruG005288		1.21112	1.27233	2.06335	0.478894	0.587901	0.548103	0.00295919	-1.19178	down
MruG042147		1.77639	1.88769	1.60156	7.2472	7.23013	8.24863	9.77395e-25	2.05235	up
MruG025635		1.52869	0.537732	0.348303	4.71593	4.63548	3.39857	1.72561e-08	2.03966	up
MruG048225		0.019608	0.040106	0.018604	1.65622	1.30019	0.893193	1.31483e-27	4.07455	up
MruG049576		1.34968	1.17293	0.70385	0.373741	0.639361	0.273778	0.00858873	-1.05359	down
MruG049571		1.36298	0.517606	1.50797	2.25775	3.62262	2.06034	0.00562395	1.06471	up
MruG030982		1.65269	1.47905	2.12947	4.55032	5.20429	6.07143	3.16305e-08	1.48839	up
MruG030985		11.3136	19	24.2558	2.35635	2.04577	1.14443	1.53434e-14	-2.68475	down
MruG030984		1.65721	1.83234	2.20624	4.99703	4.9585	4.30296	1.25733e-08	1.28515	up
MruG027053		4.31233	3.77698	3.12849	8.63283	7.51637	6.60165	5.07024e-11	1.04068	up
MruG045303		1.33073	1.24846	2.28083	0.888446	0.561277	0.408908	0.00469972	-1.0982	down
MruG032854		1.42986	0.773941	1.22877	4.70569	4.58097	5.09557	2.24049e-12	1.91559	up
MruG032857		8.07966	6.59483	6.51072	25.5603	25.0611	26.4357	2.36932e-49	1.87364	up
MruG019277		4.29009	3.26889	3.30811	1.26927	1.32834	1.58376	3.35332e-11	-1.27899	down
MruG027212		155.876	155.914	148.294	332.136	338.396	361.758	2.91529e-94	1.20934	up
MruG035856		2.79409	3.34761	2.59411	14.558	11.5385	11.4074	1.41438e-51	2.10194	up
MruG034722		7.77338	6.42954	7.10666	2.08265	2.07219	1.78333	1.47842e-17	-1.70832	down
MruG039607		4.55555	5.76784	4.51309	24.0783	29.7738	27.3166	4.55515e-22	2.31423	up
MruG028911		7.983	9.05059	8.51599	32.2321	33.01	35.9107	2.23936e-65	1.99973	up
MruG021890		3.86085	3.32414	3.06576	13.5384	12.4698	13.6293	4.24433e-33	1.93519	up
MruG030153		0	0	0	0.882067	0.836209	1.28283	1.82444e-10	3.08066	up
MruG018910		3.87441	3.81421	4.08296	8.44011	9.03159	9.4258	3.71359e-06	1.15172	up
MruG021306		345.986	337.135	356.148	52.2138	48.9606	63.1467	8.81472e-168	-2.58813	down
MruG014129		4.43191	4.49276	3.31376	0	0	0.07674	1.53331e-06	-2.40759	down
MruG045544		0.281069	0.16537	0.231387	0.819497	0.857097	1.30788	1.17261e-05	1.74147	up
MruG009168		1.01429	0.631794	0.797845	1.9158	1.84327	1.64467	0.000343127	1.07737	up
MruG004189		2.17943	1.76245	1.91445	0.07608	0	0	2.56045e-17	-3.69972	down
MruG044074		1.3504	1.43384	1.80797	0.234522	0.093706	0.244855	7.96733e-09	-2.27801	down
MruG044071		22.7508	26.4039	24.5301	73.1577	63.2103	72.5005	7.58203e-51	1.5316	up
MruG009297		3.49599	2.89806	1.53088	1.44103	0.233722	0.652285	0.00870855	-1.21677	down
MruG009839		2.91702	2.32604	3.45568	0.578642	0.561214	0.488484	1.88791e-07	-1.9392	down
MruG005329		6.24456	8.02709	5.90797	18.5618	15.8102	16.8851	1.16218e-06	1.28047	up
MruG039345		2.08649	2.43146	1.87779	0.90466	0.705925	0.687471	5.61656e-13	-1.36455	down
MruG039348		8.51537	7.43511	7.50436	19.2353	15.3216	14.8368	8.63941e-23	1.10579	up
MruG038435		0.815153	1.38526	0.880164	0.350496	0.062468	0.288887	0.0015507	-1.45287	down
MruG030394		48.1984	30.7778	53.4128	105.999	100.312	101.479	2.01418e-07	1.19175	up
MruG030395		6.61647	7.31323	8.7132	19.0637	18.0647	16.0999	1.36719e-22	1.25589	up
MruG031933		1.76137	0.668634	3.564	11.8706	10.3794	9.37833	4.18267e-10	2.08952	up
MruG017066		2.04665	1.57405	2.01048	0.614115	0.821712	0.665774	2.05217e-06	-1.2688	down
MruG041385		2.0047	2.5863	2.48598	6.70523	5.65683	5.27072	3.48661e-12	1.30695	up
MruG024972		66.9317	69.6439	74.4506	26.7101	27.2051	28.3372	2.28434e-45	-1.3008	down
MruG008213		1.69492	2.25292	1.7486	0.233586	0.153646	0.085759	3.73439e-11	-2.63868	down
MruG008214		1.55543	1.33376	1.64383	0.01616	0	0.098661	1.37312e-11	-3.075	down
MruG018592		28.3089	30.2648	32.6812	8.31052	5.78994	6.2723	1.95378e-19	-1.98499	down
MruG012857		35.3717	35.5783	37.4953	113.492	103.211	117.743	2.26595e-42	1.64283	up
MruG012851		9.44657	11.3577	7.99296	23.5953	25.5839	26.6078	9.91949e-09	1.35426	up
MruG012859		327.152	356.979	347.589	894.608	864.467	886.822	1.2464e-117	1.40018	up
MruG046505		7.623	7.09067	7.97305	17.7116	16.4171	16.6249	5.20842e-30	1.19213	up
MruG033721		6.78621	9.12964	6.44366	1.60431	2.25623	1.43944	1.96747e-07	-1.7417	down
MruG012084		1.51815	0.727307	0.928707	4.48103	6.80598	6.59649	4.45705e-12	2.21052	up
MruG012088		5.40939	5.13437	3.69436	1.08653	0.870731	0.378951	1.57754e-07	-2.03224	down
MruG004234		29.1889	27.1378	25.5611	3.77543	3.5372	3.31461	1.30156e-190	-2.86191	down
MruG004235		29.0041	30.3033	26.5245	0.074699	0.498951	0	0.002144	-1.52598	down
MruG015197		2.00288	1.97411	1.82346	0.644042	0.665581	0.523017	1.2037e-06	-1.44494	down
MruG015198		11.3492	11.7413	11.2434	0.632405	0.439169	0.963935	5.49761e-86	-3.83974	down
MruG015448		14.4151	16.1146	15.9736	39.2245	38.3591	41.6286	5.2716e-31	1.3817	up
MruG005025		1.25812	0.726857	0.951895	2.05049	2.1963	1.89351	0.000124711	1.02219	up
MruG031547		0.204968	0.149791	0.080102	4.43108	3.31137	3.89088	2.24224e-77	4.41194	up
MruG043648		48.7866	49.2497	42.0487	18.0367	16.8986	17.4131	2.33121e-36	-1.35259	down
MruG014715		1.72666	1.52262	1.63528	0.190435	0.205729	0.050977	3.45514e-19	-2.91286	down
MruG010629		13.0068	9.42888	13.002	0.964025	0.179349	1.01985	2.136e-15	-3.0439	down
MruG010624		4.12598	4.13873	4.44388	11.227	9.81736	12.1278	1.83267e-16	1.38161	up
MruG016003		60.7545	72.1217	65.2232	31.8663	29.908	30.7043	7.66797e-28	-1.03987	down
MruG030863		0	0	0	1.86753	2.32809	2.62093	1.72992e-18	3.97857	up
MruG030860		1.94557	2.20057	2.36413	5.98743	6.55126	5.09077	3.28523e-11	1.40579	up
MruG040342		9.01416	9.21897	9.57426	0	0	0	4.57353e-25	-4.51333	down
MruG027973		11.1113	9.00723	9.33676	2.37455	2.4682	1.54891	5.02041e-12	-1.94727	down
MruG049644		7.23119	8.37955	6.6541	20.6995	17.6583	20.7369	2.34178e-20	1.41855	up
MruG047770		6.41923	9.82481	8.31014	0	0	0	4.65077e-28	-4.72883	down
MruG047771		11.5181	11.6421	10.4246	33.5404	26.3816	21.9291	7.79239e-09	1.25949	up
MruG049390		52.8556	51.2307	49.7949	113.87	91.1326	107.577	3.65734e-45	1.0622	up
MruG022557		24.725	23.2159	20.885	6.66455	7.33698	6.10315	3.80776e-31	-1.68455	down
MruG000259		26.2676	26.9253	28.1545	52.779	53.9001	56.6608	2.31806e-35	1.04391	up
MruG038603		0.766851	0.266161	0.197211	1.21148	1.08125	1.45657	0.00709588	1.22036	up
MruG037007		1.22736	1.29313	0.745273	0.152762	0.390125	0.130255	2.74634e-05	-1.73496	down
MruG027568		8.74858	8.31879	7.4359	3.85808	3.76227	3.73041	5.76573e-09	-1.02495	down
MruG036069		0.698778	0.827691	0.668527	0	0.207641	0.076808	0.000946434	-1.66312	down
MruG032520		3.62819	2.97076	3.33	1.19463	1.27987	1.16111	2.01765e-10	-1.33295	down
MruG032522		2.79135	2.59569	3.33189	1.3892	0.907372	0.750717	1.72162e-07	-1.3473	down
MruG037824		1.52851	1.68087	2.07576	3.98838	5.163	3.70034	0.000243945	1.17169	up
MruG037828		4.82744	6.63615	4.89769	2.90519	1.75837	1.17589	0.0034926	-1.16355	down
MruG021598		5.59394	5.87353	5.04015	1.65657	1.16944	1.5886	4.24981e-27	-1.78668	down
MruG011772		0.701418	0.471317	0.436967	1.6853	1.27137	1.30904	0.00010475	1.2744	up
MruG019566		2.18572	2.22972	2.63045	6.25548	5.03199	6.85337	1.51605e-11	1.34747	up
MruG019564		7.32242	6.63115	7.85769	3.49618	3.4051	2.13695	2.43145e-06	-1.14419	down
MruG009512		0.135185	0.10742	0.079989	1.53039	1.56402	1.75548	9.03782e-14	2.93334	up
MruG012830		20.947	19.1851	19.7367	8.83109	7.81659	7.3241	7.25932e-28	-1.25162	down
MruG012955		4.40662	4.65442	4.87016	0.751639	0.713916	0.350004	2.40633e-39	-2.72993	down
MruG009666		2.5028	2.47876	2.87399	1.40987	1.03245	0.939054	2.06165e-05	-1.08011	down
MruG014656		2.95223	3.27146	2.60097	0.937937	0.767837	0.711159	3.47754e-12	-1.68838	down
MruG018817		33.6339	38.2837	37.4069	19.01	16.164	16.6302	2.97483e-18	-1.01272	down
MruG003439		5.91141	6.84624	6.9203	2.30857	2.61951	2.10731	7.29299e-06	-1.29952	down
MruG018448		5.07305	6.55661	5.42372	16.4707	14.0283	18.5186	3.35218e-16	1.50542	up
MruG039715		2.3944	1.68741	1.94441	0.818755	0.644481	0.965183	0.00241452	-1.08247	down
MruG039714		1.34443	2.17402	1.59377	0.136088	0.477096	0.185332	1.23009e-06	-2.00328	down
MruG039712		13.4163	12.3751	13.088	34.2074	33.8329	33.7629	1.16901e-51	1.42088	up
MruG038044		0.148684	0.30334	0.350714	0.884102	0.783084	0.786859	0.00156757	1.30931	up
MruG011353		10.9763	13.9777	9.91535	0	0	0	1.03394e-20	-4.18383	down
MruG012163		1.61118	1.48031	1.18148	0.465089	0.213303	0.250559	8.47485e-07	-1.76551	down
MruG012160		4.05843	2.5447	2.54104	0	0	0	3.42467e-39	-5.38804	down
MruG029625		5.16496	4.13352	5.15682	1.43213	1.29773	1.60582	8.75999e-16	-1.61488	down
MruG028178		1.79553	3.68423	2.10931	1.12505	0.258742	1.19092	0.00086179	-1.26204	down
MruG049864		5.78401	2.39852	4.30214	2.25951	1.9749	0.935341	0.0049063	-1.03378	down
MruG042727		2.23782	3.31656	2.84939	0.377907	0	0.642411	2.44618e-06	-2.10771	down
MruG042723		7.76531	9.90122	9.68853	4.06978	2.27567	3.58607	7.96132e-07	-1.29648	down
MruG034181		3.81145	5.38918	3.76876	0.684963	0.98092	1.33667	1.50027e-08	-1.81417	down
MruG001733		2.67253	3.34278	3.04904	0.575405	0.927315	0.903885	4.12824e-12	-1.73667	down
MruG001737		3.65192	3.89198	3.23426	1.66498	1.57286	1.00205	3.94254e-06	-1.19742	down
MruG001735		2.26419	2.47109	1.9995	0.013421	0	0	5.49791e-32	-4.88402	down
MruG006339		2.69136	2.253	2.91176	0.545349	0.962436	0.604294	5.94785e-08	-1.65116	down
MruG006332		30.5002	28.8896	27.4765	11.5678	11.6932	13.6999	4.25652e-23	-1.16708	down
MruG031738		2.49075	3.51693	2.91515	7.86162	6.68327	5.41359	1.1374e-05	1.12205	up
MruG033033		4.40934	4.10064	4.60981	8.71815	11.3864	12.218	1.35194e-08	1.26757	up
MruG033037		48.6734	46.6682	49.0197	100.082	95.4764	101.473	1.50133e-66	1.08318	up
MruG037908		1.2502	1.11989	1.13864	0.168766	0.09132	0.327451	9.87279e-05	-1.76508	down
MruG045968		2.38375	0.418309	0.807596	3.12677	3.01165	3.89173	0.00222713	1.22778	up
MruG049058		1.35885	1.26635	1.55733	0.264449	0.351731	0.594727	3.79524e-05	-1.47509	down
MruG048874		4.36862	4.73133	6.30707	8.1921	11.3463	12.2472	9.11098e-05	1.0128	up
MruG035526		1.34107	1.42645	3.0228	0.149795	0.564485	0.757408	0.0032539	-1.37297	down
MruG022013		0.660214	2.25465	1.34932	3.85891	3.19116	3.67536	0.00134199	1.17078	up
MruG021383		12.0468	13.9374	12.2393	27.2647	32.3874	35.0205	1.48425e-24	1.32919	up
MruG021387		7.49385	5.70766	5.07384	2.08689	2.45484	3.36102	0.000152246	-1.06573	down
MruG019481		2.30333	1.82227	2.38433	0.267613	0.378126	0.501877	8.46185e-08	-2.02028	down
MruG019483		0.542062	0.804311	0.745322	0.108713	0.178027	0.099035	4.08287e-05	-1.79174	down
MruG017461		2.60624	2.29283	2.12614	4.83451	5.58212	5.02334	6.67858e-10	1.13631	up
MruG014570		0.571686	0.372496	0.477019	0.213657	0.160305	0.05955	0.00305744	-1.27156	down
MruG010279		24.9593	24.3083	27.3136	119.948	136.23	138.988	1.31831e-123	2.38473	up
MruG040712		0.519468	0.433867	0.595802	1.93602	3.32307	2.63705	1.75543e-06	1.86811	up
MruG004927		6.82557	7.57089	7.32068	0.887113	1.30285	2.19943	8.35713e-18	-2.10899	down
MruG027797		4.86948	4.61844	5.89166	0.063491	0	0.042879	5.25046e-44	-5.11436	down
MruG042025		1.52117	1.45191	1.74557	5.48018	4.81668	7.20259	5.36814e-13	1.79323	up
MruG047053		16.584	16.2272	16.8002	45.6762	63.1323	53.9841	1.23968e-23	1.70427	up
MruG022383		6.54988	3.70577	5.52953	2.17568	2.24166	2.15353	0.00659428	-1.01208	down
MruG043637		3.78399	2.6823	4.16773	0.711951	1.59816	1.40552	0.000129406	-1.28897	down
MruG045025		0.116446	0.729644	0.434513	6.12411	5.94594	7.46363	1.88468e-09	2.64498	up
MruG040056		0.780977	1.24229	2.01889	7.36342	7.05075	6.31385	3.04739e-09	2.02541	up
MruG040057		1.24128	0.932972	0.945439	7.38918	5.92889	5.79507	9.38272e-45	2.55206	up
MruG040051		13.7085	13.845	13.5295	4.6921	4.49646	4.7664	2.90934e-40	-1.48731	down
MruG040053		3.37495	2.65073	3.32848	6.70231	7.98501	6.24722	0.000293811	1.07827	up
MruG031312		148.758	139.862	143.776	278.846	316.595	334.043	2.49614e-52	1.14574	up
MruG006276		6.07233	4.8263	5.54964	0.99928	0.363811	0.590413	6.85875e-12	-2.4476	down
MruG006277		5.73241	4.9559	4.91435	0.693509	0.363811	0.590399	3.62001e-13	-2.58179	down
MruG006275		8.45525	8.68159	8.01102	4.04705	3.72671	3.96411	3.6065e-07	-1.00754	down
MruG021148		1.47411	1.38427	1.04469	0.138157	0.044675	0.100762	9.10565e-10	-2.60497	down
MruG048686		0.565801	0.530116	0.553633	2.02461	2.60843	2.61056	1.38836e-07	1.84481	up
MruG019139		2.19969	2.18698	2.25409	0.332423	0.871082	0.553671	1.92073e-06	-1.6071	down
MruG019132		1.11606	0.9171	0.765657	4.07835	4.52624	4.33145	1.20421e-12	2.0272	up
MruG011103		96.2011	99.2769	91.9046	24.5507	26.5313	29.0784	9.13265e-91	-1.78059	down
MruG004258		7.06297	7.4683	7.93866	1.99843	1.99019	2.60183	5.03938e-14	-1.63027	down
MruG046048		0.420273	0.273258	0.423313	0.173677	0.065762	0.11504	0.00414544	-1.22541	down
MruG021996		5.45269	3.32741	3.4662	0.471796	0.706743	0.888501	1.25883e-07	-2.05209	down
MruG021997		3.38701	3.14964	3.54696	0.602469	0.329053	0.490909	1.22051e-10	-2.28738	down
MruG021999		15.528	15.5367	14.9716	6.98799	6.60587	6.00731	9.3353e-20	-1.16041	down
MruG027106		7.1668	7.40226	8.62666	1.12706	1.32047	2.13374	2.42127e-09	-1.98499	down
MruG042225		10.9775	11.8066	11.065	2.97777	3.01055	3.22015	4.29254e-39	-1.79109	down
MruG038534		7.99254	7.88268	6.69068	19.0552	19.3085	20.1054	8.44416e-34	1.39928	up
MruG042590		1.58571	1.70884	1.71785	0.385707	0.293804	0.214736	1.66008e-15	-2.19166	down
MruG030216		12.4868	12.2525	11.2841	3.78165	3.56708	4.28024	6.72888e-28	-1.5451	down
MruG044331		1.79148	2.05305	1.45744	0	0	0.040376	1.14228e-18	-3.89253	down
MruG001540		0.9736	0.571168	0.846358	0.357848	0.292179	0.34343	0.00257789	-1.04851	down
MruG007254		49.0226	57.9906	52.4598	17.7147	14.4146	16.3612	3.06628e-54	-1.646	down
MruG007253		0.527076	0.563785	0.117193	2.01192	2.53172	2.68617	9.48488e-07	2.02353	up
MruG007252		3.71473	1.86183	4.44063	1.5653	1.10979	1.02553	0.00905396	-1.09435	down
MruG007259		80.3149	82.3152	86.4156	25.1973	28.4975	23.5814	7.05494e-72	-1.62612	down
MruG003944		14.4294	15.4318	17.4437	5.8606	5.49537	6.43406	2.85138e-19	-1.32918	down
MruG003942		274.257	283.004	304.973	27.6794	32.4072	31.1698	5.4974e-303	-3.16911	down
MruG039227		0.143681	0	0	3.87498	3.37787	3.12789	2.136e-15	3.53131	up
MruG039223		0.882722	0.68962	0.805512	2.14045	2.00427	2.02111	0.000792796	1.21095	up
MruG039229		14.5705	16.9011	17.9411	57.0496	63.5186	69.2078	1.25928e-47	1.94508	up
MruG039228		15.7013	15.2303	17.6234	4.50333	3.07585	3.8261	1.13551e-19	-1.92806	down
MruG046204		3.11483	2.60648	3.46264	1.00051	1.04986	1.45457	0.00618019	-1.09259	down
MruG036350		4.43048	4.90172	4.92589	10.4064	10.024	12.1037	4.73259e-20	1.21195	up
MruG002833		63.8156	60.0871	60.0259	14.1696	13.9222	14.5929	3.41178e-165	-2.04709	down
MruG000087		29.0987	29.8572	28.5901	67.1469	66.2986	66.7157	1.19378e-83	1.23511	up
MruG034849		0.151084	0.23334	0.29857	0.83654	0.675023	0.788736	8.438e-06	1.53063	up
MruG048318		93.1527	73.3109	70.5336	13.1352	13.3109	12.1055	1.28853e-89	-2.52424	down
MruG010581		3.67854	3.03161	4.68473	12.1481	11.3759	11.7169	4.96993e-23	1.62026	up
MruG046749		4.04037	2.20712	5.38419	1.02847	1.15774	1.56957	8.33517e-05	-1.3729	down
MruG001613		1.9104	2.19461	0.842802	14.6731	13.2443	10.956	1.35361e-17	2.6418	up
MruG035926		3.35031	2.66823	3.46707	4.98592	7.72411	7.78146	9.56242e-05	1.05269	up
MruG019306		1.61395	1.78823	1.83218	0.447277	0.34649	0.165155	1.99311e-07	-1.95135	down
MruG047866		20.2824	17.337	17.6141	7.19774	7.24707	7.66853	7.70833e-23	-1.25001	down
MruG033186		9.94036	11.991	9.25052	20.9802	19.7568	24.1411	3.01941e-15	1.08112	up
MruG017913		3.51545	3.00764	4.13065	0.572548	0.482551	0.207587	5.36005e-18	-2.65605	down
MruG043024		97.3161	97.394	90.026	164.34	192.186	208.138	6.33491e-30	1.02758	up
MruG040321		2.39623	1.33056	2.27104	0.440693	0.359001	0.454892	4.61618e-09	-1.929	down
MruG041493		1.69337	0.774601	1.42231	4.78314	4.89254	6.24175	2.73979e-07	1.77514	up
MruG041492		0.936909	1.16315	0.941415	3.43517	2.61605	1.73029	1.39684e-05	1.26545	up
MruG019880		22.7673	22.2093	25.7225	7.8636	8.96718	7.63883	4.31449e-21	-1.44832	down
MruG019882		161.824	151.738	164.04	351.22	389.585	443.116	1.22027e-54	1.34649	up
MruG019885		7.92603	7.42117	5.31156	36.7076	44.2463	45.1828	1.66126e-59	2.58376	up
MruG041945		2.61228	0.948085	1.15957	13.9074	14.5465	15.0663	1.21569e-31	2.98418	up
MruG020672		0.793573	1.14234	1.53824	3.3793	2.34933	2.82283	0.00309894	1.11534	up
MruG037052		5.35496	3.77594	6.1086	0.901671	1.21308	0.834017	2.60521e-06	-1.8346	down
MruG040220		15.26	12.9216	11.9076	57.06	55.191	56.5026	5.88448e-141	2.10533	up
MruG038638		2.37678	1.34284	2.47648	3.749	5.1165	4.65826	0.000923727	1.03806	up
MruG004526		3.06896	3.16847	2.7832	9.6559	7.13662	8.42631	3.49097e-05	1.34223	up
MruG002201		1.51248	1.93443	1.28833	0.735737	0.729739	0.229883	0.00943726	-1.11291	down
MruG040482		5.53733	5.34217	6.46918	22.8869	21.338	24.8879	1.56229e-57	2.00201	up
MruG041689		12.2259	9.56292	11.0561	3.45522	6.45859	3.33792	0.000233231	-1.13669	down
MruG025099		2.16971	2.47827	2.12222	0.862554	1.08015	0.955362	0.000161684	-1.08014	down
MruG025545		17.7167	16.6032	17.8416	38.5351	37.0612	31.9666	1.2112e-33	1.08164	up
MruG037762		10.5375	11.0879	9.96106	2.69503	3.78165	2.48881	8.88123e-19	-1.70181	down
MruG022018		0.401314	0.513272	0.433787	1.90425	2.19813	1.8493	1.00227e-07	1.83849	up
MruG023652		7.13352	6.95561	8.00895	2.80289	2.73193	2.57603	1.24743e-08	-1.31372	down
MruG005535		3.81675	5.37573	4.00392	1.02921	1.60974	1.31358	7.29213e-08	-1.53308	down
MruG020302		2.36538	2.65894	1.90192	0.421775	0.788815	0.123332	2.28932e-05	-1.77282	down
MruG020300		1.4322	1.20033	1.83352	0.373669	0.22572	0.247776	9.18163e-09	-1.97836	down
MruG025934		1.82621	2.01988	2.2008	0.61102	0.771166	0.890371	1.96409e-06	-1.2679	down
MruG021220		340.311	348.916	333.251	150.268	148.654	154.384	2.0711e-117	-1.12267	down
MruG031843		3.81877	2.92299	3.49991	9.87514	12.6657	14.2523	8.6231e-25	1.82378	up
MruG009747		1.91369	1.69511	1.22217	5.48363	4.29315	5.37518	1.28889e-05	1.46308	up
MruG009744		0.206269	0.298477	0.354815	1.89221	1.54649	1.40952	6.7874e-13	2.21494	up
MruG009743		0.257125	0.079203	0.121328	1.0333	0.711715	0.883126	7.02009e-05	1.81852	up
MruG009748		3.4124	2.94328	3.04516	12.5641	9.73534	9.62948	3.52449e-14	1.70977	up
MruG020880		0.482587	0.284963	0.368979	1.30574	1.35148	1.40431	3.04941e-06	1.60118	up
MruG014464		6.93761	7.91022	8.57096	12.2243	19.4196	17.1983	5.57009e-07	1.05198	up
MruG013112		1.70247	2.66989	0.909045	5.67384	2.98306	4.16591	0.000964945	1.14803	up
MruG028431		1.25404	0.464612	1.45147	12.3762	9.15325	13.3163	1.07965e-19	2.95679	up
MruG004309		30.1817	27.2728	30.1031	18.9176	10.2763	8.6542	0.00162243	-1.03486	down
MruG014332		56.0696	60.7668	57.1445	20.8921	23.5459	22.8558	4.38737e-56	-1.31332	down
MruG042603		0.169151	0.447115	0.439801	0.890929	0.79153	1.10082	0.00628876	1.13854	up
MruG031394		93.8295	88.7145	89.9822	20.9652	19.6527	20.9361	8.03068e-184	-2.08563	down
MruG048607		1.63664	1.58481	2.12319	6.17393	3.81111	3.73293	0.000307992	1.22129	up
MruG046518		8.9755	10.4809	9.85918	20.3443	20.6204	25.4843	1.64966e-13	1.18891	up
MruG034374		35.6083	30.8867	22.9559	77.0211	74.1414	59.9054	3.78514e-22	1.2637	up
MruG038110		1.19033	2.04642	1.3305	0.505944	0.683154	0.574968	0.00900084	-1.08106	down
MruG036844		15.7754	19.6944	18.3877	186.597	180.404	188.695	0	3.38444	up
MruG036843		5.63593	4.90863	4.05574	31.4431	30.5835	30.8208	4.33166e-94	2.6637	up
MruG036841		21.0805	23.8008	24.0267	0.589832	0.485473	0.40172	1.82351e-92	-5.0123	down
MruG036260		4.58371	3.41879	3.45022	12.1451	10.7219	12.5764	3.42231e-27	1.62932	up
MruG026365		0.982578	1.06259	1.7783	0.475914	0.509725	0.382797	0.00161736	-1.19403	down
MruG033724		10.2529	11.0821	9.07632	22.031	21.5954	21.9969	3.42257e-21	1.13913	up
MruG033727		10.4474	10.8342	9.35043	20.8873	22.7327	21.2615	5.54201e-19	1.1101	up
MruG044015		1.83742	1.41607	1.44758	0	0	0	4.86939e-22	-4.29012	down
MruG026581		1.01897	0.829855	0.693744	2.52815	3.00498	3.05419	5.12423e-06	1.54176	up
MruG028639		13.4371	13.5308	13.7905	40.3362	39.4852	41.9002	5.83491e-61	1.60724	up
MruG027182		1.49157	1.39861	1.35459	3.25851	3.51856	3.3183	1.01302e-08	1.22674	up
MruG015796		21.5861	22.8674	22.605	46.9354	50.2436	54.4634	1.31436e-36	1.21113	up
MruG012556		0.446871	0.591512	0.332967	0.011965	0.026798	0.057255	2.21253e-09	-2.59773	down
MruG029581		8.99498	9.22631	9.91253	1.47262	1.29739	1.5723	2.02791e-22	-2.42413	down
MruG011725		0.958044	1.01007	1.03605	2.99758	3.97064	3.12297	4.79784e-06	1.5399	up
MruG002644		3.25041	2.36688	4.76524	8.8218	7.37219	7.15291	1.67637e-06	1.1374	up
MruG003313		1.82075	4.39775	4.65426	8.34615	7.62387	10.8965	0.000158987	1.19589	up
MruG008791		2.04007	1.78432	1.7206	0	0.066985	0.02784	4.09462e-11	-3.06895	down
MruG011397		0.841041	0.692846	0.635926	1.79226	2.00352	1.82458	6.8886e-07	1.3069	up
MruG010047		4.22257	2.4648	3.32555	7.26631	7.62492	8.29748	1.14734e-07	1.18856	up
MruG015671		3.46588	3.00672	2.33752	0.503441	0.784922	0.765032	1.09908e-08	-1.8044	down
MruG005771		6.46688	7.67585	6.35614	3.58827	2.33697	3.02196	5.42849e-05	-1.0509	down
MruG024233		1.73951	2.58584	3.36109	0.441815	0.369131	0.68769	9.10725e-10	-2.00036	down
MruG003327		0	0	0	5.94515	4.68015	4.5544	2.70687e-11	3.194	up
MruG003326		3.4317	4.7986	5.17628	0.464462	0.34477	0.285754	6.93799e-14	-2.82144	down
MruG013097		8.50202	7.14059	9.4324	15.704	21.2602	16.5836	1.97776e-05	1.06053	up
MruG041259		2.14656	1.13916	2.37879	7.58146	6.63962	4.22474	1.36324e-05	1.50232	up
MruG039409		14.767	14.1303	14.5446	4.53008	3.05214	4.3077	1.87796e-32	-1.77146	down
MruG022266		6.27286	5.33967	3.35392	20.9124	20.0882	28.6523	2.58672e-13	2.04186	up
MruG022263		208.374	205.969	222.942	68.6307	73.2596	79.7963	3.3922e-54	-1.46277	down
MruG022260		65.2799	62.6721	65.3573	134.132	143.952	168.813	1.022e-29	1.23912	up
MruG031390		3.09285	2.26816	3.05384	6.05144	5.43354	5.48767	5.22599e-09	1.02189	up
MruG040398		0.4638	0.586196	0.539333	2.32856	1.49316	2.05288	5.50056e-06	1.61417	up
MruG025256		26.7933	28.9686	28.7081	11.2365	10.9811	10.4479	2.54886e-45	-1.30895	down
MruG018032		7.09238	8.2023	6.57608	3.32965	2.35085	2.44729	5.85222e-09	-1.29552	down
MruG034658		1.10483	1.0499	1.19279	4.703	3.88396	3.85701	5.87938e-16	1.81928	up
MruG018034		1.00967	1.45083	0.968861	0.377739	0.341024	0.61152	0.00795711	-1.0806	down
MruG022704		2.99653	3.45177	3.33933	0	0	0	2.33449e-40	-5.41805	down
MruG032768		0.523562	0.190927	0.231341	7.05068	6.46103	6.14562	2.06749e-52	4.00157	up
MruG032766		1.0542	0.440875	0.680887	9.88603	9.65333	9.86738	4.24164e-62	3.57695	up
MruG007315		35.8578	32.6469	37.5229	10.4408	14.6984	12.4415	4.75027e-27	-1.42183	down
MruG019093		89.7217	66.8965	77.151	0.264467	0.096937	0.109486	1.98612e-237	-7.95164	down
MruG044835		1.48525	0.723746	0.669217	2.45798	2.9496	2.96375	1.41523e-05	1.40001	up
MruG020291		1.65477	1.75406	1.58269	0.969317	0.416006	0.810005	0.00201174	-1.00164	down
MruG035234		21.6759	23.2411	24.1375	7.13955	7.71433	7.18009	2.65345e-66	-1.58695	down
MruG033683		3.57776	2.70369	4.23649	1.95303	0.785003	1.07029	0.00399415	-1.13561	down
MruG033680		5.72222	7.34806	7.27233	19.1542	12.7826	12.4622	1.94977e-05	1.08865	up
MruG027664		2.02824	1.78777	2.03046	0.400084	0.140367	0.364187	1.46419e-11	-2.23829	down
MruG027662		2.31407	2.73762	2.24668	0.275008	0.314122	0.249528	1.61903e-19	-2.69521	down
MruG029958		0.42453	0.095887	0.311499	2.33983	1.29062	1.69813	6.38836e-06	1.96204	up
MruG011923		5.75659	4.3713	5.0645	10.9764	9.98516	9.41644	7.69352e-11	1.01766	up
MruG011920		4.29808	4.25796	4.63109	9.16688	9.84057	8.64822	4.18577e-07	1.05869	up
MruG018860		2.14101	1.38081	3.35351	1.47037	0.539374	0.275158	0.00349071	-1.21961	down
MruG029041		5.17545	4.96097	5.00393	13.5335	11.0115	11.4787	3.35381e-34	1.28111	up
MruG008612		0.903003	0.834113	0.388658	0.287349	0.146551	0.269681	0.00179368	-1.23996	down
MruG019026		4.93102	4.88552	4.67062	0.990587	0.70858	0.86214	1.0466e-49	-2.3672	down
MruG039935		0.662071	0.386778	0.828918	12.7137	9.2708	11.6754	1.27232e-30	3.59838	up
MruG039933		0.301598	0.288904	0.181704	5.71176	4.57542	4.54884	6.23285e-30	3.66574	up
MruG028808		2.60561	2.33319	3.17632	0.442106	0.187505	0.016017	6.79514e-07	-2.27645	down
MruG028801		1.43679	1.18625	1.33886	0	0	0	6.56627e-13	-3.40744	down
MruG028804		2.50583	1.70107	1.66665	0.342645	0.251749	0.393992	4.22959e-10	-2.12953	down
MruG028807		5.7111	5.34366	5.48692	0.86453	0.549761	0.623066	4.72143e-51	-2.82909	down
MruG002758		12.4865	8.87715	10.5483	22.672	23.047	23.2616	3.93021e-16	1.13483	up
MruG046126		2.18181	1.18951	1.79948	0.110005	0.133494	0.073277	2.40334e-13	-2.93453	down
MruG007679		0.59943	0.704778	0.79946	0.118776	0.172643	0.284361	0.000427091	-1.45489	down
MruG022098		16.4615	18.9548	17.4724	6.56133	6.5047	6.18982	1.12443e-30	-1.38639	down
MruG034927		2.77683	2.67526	2.6888	0.774469	0.50871	0.541495	1.31841e-16	-1.94563	down
MruG034928		4.2283	4.5219	3.2775	0.747446	0.438007	0.83208	9.51389e-06	-1.87661	down
MruG024301		29.6286	34.5844	29.4523	4.31599	4.05856	2.5923	1.74905e-70	-2.94049	down
MruG027063		0.328999	0.350324	0.744378	4.20611	4.26969	4.41927	2.06551e-18	2.7913	up
MruG001141		6.1954	6.54972	7.24672	0.112699	0.070124	0.013532	9.79493e-64	-5.35424	down
MruG028877		4.43343	6.03799	4.17077	1.61868	2.25465	1.09816	2.71945e-06	-1.36546	down
MruG045333		1.03362	1.74373	2.92149	4.60193	4.51549	4.88631	0.00198396	1.13101	up
MruG008454		1.64508	1.86387	1.85717	0.403764	0.407332	0.237105	3.06252e-06	-1.82072	down
MruG019229		0.923144	0.512031	0.698387	1.92898	1.98217	2.17865	1.71472e-06	1.40599	up
MruG010507		12.7513	13.4426	12.2842	28.3766	28.1618	30.6464	4.95046e-46	1.21713	up
MruG017999		4.32325	3.75204	4.10019	1.75717	1.16849	1.64773	1.20674e-06	-1.25789	down
MruG021861		1.08597	1.61561	2.56125	3.49274	3.59571	4.20385	0.000179537	1.04751	up
MruG017336		114.035	120.346	112.725	28.2431	30.6713	40.1394	1.66011e-50	-1.73525	down
MruG039838		1.34761	0.830571	0.962058	0.326082	0.55535	0.36414	0.000777147	-1.12733	down
MruG042354		7.0296	6.99649	7.61522	2.48054	2.16887	1.98569	1.45385e-34	-1.62195	down
MruG015208		4.00697	7.26297	6.0341	2.15274	2.39829	1.69841	2.05813e-05	-1.27229	down
MruG014154		0.870398	0.738185	0.5182	2.32095	2.22894	1.03672	0.00421715	1.15941	up
MruG009153		5.91312	6.786	5.2352	0	0	0	6.52543e-30	-4.83959	down
MruG009154		7.80957	7.18191	5.26801	0	0	0	8.10185e-22	-4.27538	down
MruG043557		4.67036	2.90348	5.83233	1.61586	1.76743	2.21203	0.00521655	-1.02957	down
MruG044689		5.07839	4.70867	3.33066	10.1001	9.45926	10.5031	4.55323e-13	1.20809	up
MruG001388		38.4775	39.7991	32.9263	15.009	14.5747	18.3428	1.07461e-23	-1.1494	down
MruG001386		6.47467	7.43686	7.79768	1.86644	2.96474	3.18944	2.69886e-05	-1.25625	down
MruG050234		7.11456	7.56928	6.81978	2.8621	3.72976	2.35572	7.71589e-11	-1.17234	down
MruG004404		9.43808	8.97956	8.55429	4.33871	4.24592	3.97321	5.65459e-09	-1.0187	down
MruG003839		1.0778	1.18165	0.964455	0.404156	0.155567	0.324684	0.00358366	-1.31686	down
MruG049159		3.9089	1.59442	2.21715	1.55201	0.380161	0.761222	0.00265185	-1.19689	down
MruG000412		3.55177	2.91516	2.36283	1.53569	0.766582	1.13266	0.000180787	-1.16152	down
MruG025195		0.570854	1.23195	1.76178	4.01156	3.55946	5.31257	8.47461e-07	1.63804	up
MruG037643		4.62863	3.92017	4.09226	1.78767	1.73454	1.19933	1.567e-18	-1.33553	down
MruG015351		5.7679	6.7244	5.23966	2.41006	1.86271	2.03801	1.04617e-18	-1.39608	down
MruG031908		0.958866	0.616243	1.22776	3.13052	2.12226	4.54396	0.000277842	1.47672	up
MruG027458		6.6147	5.31463	5.12563	12.5246	10.835	10.0798	4.55498e-15	1.001	up
MruG046893		4.88988	4.80189	2.43529	8.10397	14.5992	14.4545	4.64764e-07	1.50064	up
MruG029505		2.09092	1.79514	1.99276	21.2501	21.1602	21.1444	9.89043e-32	3.14648	up
MruG029504		4.45188	3.49913	3.24116	9.70673	8.76154	9.5317	6.46781e-07	1.27103	up
MruG029500		1.54193	1.34467	1.28385	6.11288	3.97125	4.00863	1.57833e-06	1.57297	up
MruG035106		0.896561	0.987609	0.636605	0.127968	0.292489	0.053618	4.33238e-05	-1.77309	down
MruG038655		1.09102	1.12233	1.01091	0	0	0	3.16538e-10	-3.05069	down
MruG008172		0.346661	0.374833	0.255329	1.37116	1.78767	1.11021	2.71318e-07	1.82895	up
MruG011882		3.20252	2.92678	3.17986	0.617822	0.876466	0.603002	1.27935e-06	-1.75201	down
MruG011887		1.36513	2.14323	2.27136	0.040502	0	0	3.88814e-17	-3.77655	down
MruG001269		7.48117	9.7586	8.6452	4.02313	3.57263	4.23145	9.45065e-14	-1.05779	down
MruG004889		0.035105	0.210514	0.045303	0.576236	0.437396	0.216386	0.00165705	1.47327	up
MruG013908		13.4784	14.6565	15.1405	5.64524	3.37153	5.0379	7.18063e-18	-1.51392	down
MruG004601		79.2737	81.2943	83.3545	27.8373	28.509	30.333	4.58203e-77	-1.43639	down
MruG012055		27.1662	26.7323	27.1741	6.83452	6.7909	6.29631	2.10066e-139	-1.96304	down
MruG006056		1.44152	1.62331	1.19889	0.367241	0.479839	0.810624	0.00696085	-1.08355	down
MruG011505		3.54197	3.71711	4.02705	1.27796	1.24483	1.75047	0.000284154	-1.1885	down
MruG005817		0.347561	0.684992	0.690607	2.29775	2.39366	2.09449	6.0535e-10	1.80869	up
MruG023236		3.07794	2.76346	2.52366	0.564364	0.479033	0.302979	7.50686e-07	-1.99367	down
MruG009347		0.510397	1.13605	0.739167	0.36776	0.251404	0.368224	0.00483836	-1.03105	down
MruG041395		0.194925	0.101249	0.183182	1.40653	1.89472	1.33478	8.46701e-12	2.58541	up
MruG041393		0.18699	0.211589	0.198703	1.8518	1.02792	0.690919	1.45702e-06	2.01258	up
MruG001640		1.18812	1.02818	0.67611	0.13628	0.113392	0.04258	1.71556e-11	-2.57006	down
MruG040318		20.1545	14.7563	16.6636	4.53185	4.84903	4.54359	3.00032e-38	-1.80153	down
MruG048162		1.15116	0.731598	0.888766	0.165901	0.177844	0.230887	7.06252e-05	-1.66668	down
MruG030521		8.81672	10.6051	10.6745	2.59024	3.37386	2.25501	1.11987e-06	-1.59942	down
MruG006236		0.619608	0.648893	0.245942	2.41604	1.55481	1.82495	9.22914e-06	1.64789	up
MruG012877		2.31413	2.09084	2.6696	10.3469	9.10367	10.2676	2.19789e-41	2.05694	up
MruG039297		4.33552	2.23123	2.29679	14.3444	11.5096	14.6179	9.38624e-23	2.11575	up
MruG007772		6.13492	5.43856	5.96741	1.27985	1.30684	0.883535	5.08366e-29	-2.1816	down
MruG003649		25.6615	30.4538	28.0214	6.04215	4.90828	5.60634	3.61185e-100	-2.2634	down
MruG049694		0.717767	0.466939	0.51634	2.00537	1.24923	1.22476	0.000595275	1.23389	up
MruG046418		5.08193	5.44574	4.80893	10.4663	10.3848	9.95296	4.53541e-12	1.0298	up
MruG046417		0.978524	1.35899	1.00114	0.085592	0.144067	0.081624	5.62841e-11	-2.56345	down
MruG031735		5.31886	4.77762	6.41404	12.9311	14.2424	13.1329	3.7899e-15	1.28893	up
MruG039126		18.5106	20.6508	21.1355	8.54104	8.4178	8.94013	1.65574e-28	-1.15837	down
MruG022785		3.08243	2.79157	4.01881	0.424658	0.577574	0.043353	7.08224e-09	-2.41436	down
MruG022780		0.265622	0.564264	0.341951	2.53714	2.18596	2.68359	3.02753e-22	2.48533	up
MruG022781		1.87207	2.01265	1.86863	7.30586	6.49504	5.20701	1.41925e-22	1.70977	up
MruG036962		0.808597	1.18757	1.34616	0.432437	0.450123	0.149212	0.00309357	-1.27332	down
MruG025433		3.27288	5.66255	3.75699	0.862487	1.26283	0.629599	1.9252e-05	-1.71694	down
MruG025438		9.10292	10.5363	9.14014	0.27567	0	0.089588	7.68153e-41	-4.75413	down
MruG036383		13.9109	19.2842	17.3291	6.6626	5.83127	8.46849	5.21346e-10	-1.1769	down
MruG033608		33.1567	28.38	26.3873	7.05782	8.92337	9.55705	7.64183e-26	-1.68972	down
MruG034894		8.56986	9.003	5.86882	1.77887	3.32379	1.35119	1.6453e-05	-1.53973	down
MruG027552		2.80915	1.79354	2.12927	0.586435	0.592785	0.684216	0.000767873	-1.40636	down
MruG027553		4.42684	3.49264	2.68374	0.955994	0	0.425376	1.54806e-05	-1.98186	down
MruG028067		5.27848	7.01678	5.64676	1.12393	1.30617	0.620454	1.37398e-17	-2.2935	down
MruG012217		1.96926	2.33964	2.79534	0.126219	0.089379	0	3.02724e-17	-3.49764	down
MruG019536		17.3571	17.925	19.7574	7.29782	7.28042	7.15177	1.32955e-23	-1.27063	down
MruG017595		17.9017	19.1486	20.8827	75.8259	82.1376	85.3592	1.01791e-86	2.08842	up
MruG037726		1.08289	0.948588	1.39437	0.097119	0.011006	0.181441	3.38696e-09	-2.51101	down
MruG011748		0.438683	0.312652	0.490133	5.13601	5.21409	5.06368	1.08325e-25	3.20198	up
MruG011294		2.49163	3.00896	2.14651	1.05448	1.15211	1.22393	2.71781e-05	-1.0353	down
MruG028880		156.419	181.944	174.425	19.8263	18.5833	23.2567	1.68849e-187	-2.97347	down
MruG028883		9.87936	12.1574	11.2749	27.0464	26.7954	25.4539	2.18216e-33	1.28169	up
MruG028884		13.6922	11.8758	11.7113	1.9824	2.42733	1.93026	2.10524e-47	-2.42283	down
MruG005122		14.1541	11.0635	12.4986	4.33017	4.76124	4.80203	1.95613e-05	-1.25754	down
MruG041351		50.228	55.0581	50.8043	0.757657	0.261703	0.653662	0	-6.19226	down
MruG041355		12.8035	10.4091	11.5335	2.33481	2.66378	0.563343	2.92781e-12	-2.25958	down
MruG047211		8.89436	8.6761	7.1972	17.3444	15.1578	18.5807	7.05883e-10	1.05725	up
MruG047210		1.06633	0.465769	0.654848	2.94663	1.76963	1.96215	0.000135821	1.38804	up
MruG039722		37.0647	38.3626	36.0246	5.40303	7.01771	6.34707	4.70313e-68	-2.46932	down
MruG038093		0.969595	0.771949	0.770458	1.91874	1.73546	2.15228	1.87796e-05	1.15254	up
MruG012159		1.74885	1.62252	1.8153	0.362167	0.435924	0.447405	1.38214e-08	-1.77718	down
MruG012153		5.12664	5.50217	5.03854	2.54036	2.25409	2.26222	3.34342e-12	-1.07393	down
MruG000327		4.86247	5.8404	4.77259	12.541	12.698	11.771	2.74671e-12	1.25603	up
MruG000325		8.65809	8.37043	8.62464	22.3774	18.696	19.914	8.07086e-46	1.28452	up
MruG029263		56.2076	59.6891	60.2585	114.53	128.196	147.124	1.33229e-24	1.17539	up
MruG048292		0.838011	1.01527	0.963886	0.073956	0.053439	0.16773	9.20521e-07	-2.17988	down
MruG043246		1.39775	1.03002	1.04299	0.381897	0.375339	0.530192	0.00141392	-1.17037	down
MruG046997		2.24145	3.29866	2.64364	0.567627	0.657661	0.422982	1.38518e-05	-1.78196	down
MruG021455		1.48666	1.83721	1.75371	0.537172	0.382515	0.205246	7.6823e-05	-1.61368	down
MruG034969		35.6947	37.1226	37.0765	4.14798	2.91973	3.0167	1.66687e-163	-3.32496	down
MruG028310		2.53226	3.11204	2.5931	1.29453	1.03427	1.18245	6.20952e-07	-1.11298	down
MruG048733		1.77307	2.23433	1.61079	0.724951	0.864849	0.579109	6.2813e-06	-1.21185	down
MruG038775		10.7636	9.5941	7.96904	21.9396	19.5813	22.3101	1.07582e-12	1.18254	up
MruG036184		4.53102	2.90019	4.42155	56.1504	61.8013	67.2426	7.72417e-136	3.88333	up
MruG024626		2.21101	2.21735	2.53512	1.11353	0.678033	0.928056	0.00130978	-1.1236	down
MruG037229		0.055158	0	0.09116	0.840491	1.09535	0.633713	9.40957e-08	2.48605	up
MruG011301		35.6795	33.9173	34.0273	6.0752	6.09451	7.2812	2.97838e-113	-2.3383	down
MruG027745		0.276328	0.640093	0.387248	2.29076	1.74695	1.59701	5.2746e-06	1.75716	up
MruG027744		3.11069	3.90943	4.00477	1.58875	1.04099	0.944324	6.32207e-08	-1.44597	down
MruG027749		0.66413	0.33957	0.494155	2.26917	1.15273	1.67402	5.68785e-06	1.55136	up
MruG018551		10.2153	7.97544	7.26367	33.058	32.6085	36.0799	2.67818e-75	2.01848	up
MruG016462		31.8997	33.5192	27.2865	8.41987	7.62858	9.12132	2.65115e-45	-1.79611	down
MruG016463		13.7129	13.6121	14.737	2.27389	2.34057	2.05226	1.1736e-56	-2.53136	down
MruG029161		0.081081	0.059786	0.042824	0.731985	0.511197	0.666687	6.22494e-11	2.59085	up
MruG017418		8.15054	9.37257	9.71971	15.0952	20.9313	19.1488	1.4154e-11	1.03782	up
MruG011156		10.4751	7.40341	10.9424	3.54638	2.91711	3.68892	3.93618e-17	-1.41463	down
MruG019702		6.14513	9.10888	7.01045	14.9912	16.4787	18.4086	5.53648e-06	1.12487	up
MruG018452		23.7315	25.3295	25.8072	5.7612	4.3348	7.98197	3.43486e-28	-1.93199	down
MruG010822		2.71761	2.52763	2.62803	0.872689	0.853906	1.41393	0.000158925	-1.14215	down
MruG001306		11.5266	13.6647	13.4426	3.03082	3.26998	2.73793	8.46688e-23	-1.94729	down
MruG004488		7.64707	7.09108	8.91414	0.977001	1.67127	1.87734	6.79619e-15	-2.14087	down
MruG004487		7.5237	7.8092	7.61855	2.37071	2.31713	2.3508	2.62935e-14	-1.57009	down
MruG004485		9.54531	9.74985	11.1818	1.52008	1.49707	2.26928	8.6263e-25	-2.32347	down
MruG018312		1.67978	0.954565	1.1399	7.27142	7.95995	7.91411	2.40344e-29	2.5073	up
MruG005355		1.298	1.04515	1.56036	0.164364	0	0.067067	2.33608e-10	-2.74744	down
MruG030217		0.814943	0.038649	0.591158	5.731	4.57507	3.92972	4.21768e-10	2.51602	up
MruG023403		5.99619	5.21682	5.28823	1.90784	1.94585	1.73246	9.67856e-50	-1.49681	down
MruG003211		7.3124	8.58413	6.49015	0.757793	0.797897	0.482385	4.30327e-30	-3.08241	down
MruG004978		1.3137	2.19097	1.85289	0.540873	0.59755	0.377819	1.07062e-05	-1.51219	down
MruG038445		1.56653	1.71464	1.29281	0	0	0.046668	8.86606e-25	-4.24254	down
MruG038446		0.069797	0.03943	0.025187	0.41588	0.311811	0.319138	6.32148e-20	2.67737	up
MruG033544		29.1015	24.959	27.8907	4.91226	4.87246	3.90867	1.26186e-31	-2.40109	down
MruG018121		4.68394	4.19005	3.94018	10.0905	10.7185	10.7795	1.58393e-17	1.31227	up
MruG018120		0.151966	0.208718	0.066638	1.62524	1.52328	1.87695	3.09602e-16	2.93368	up
MruG018123		0.803135	0.847416	0.696589	0.052049	0	0	1.50281e-14	-3.36758	down
MruG001555		0.254118	0.310149	0.11773	1.67058	0.939377	1.05147	4.50814e-06	1.89265	up
MruG044328		0.315585	0.172793	0.285156	1.28964	0.895408	0.97097	4.57561e-08	1.79521	up
MruG031546		1.63616	1.4069	1.4665	7.26418	6.77645	6.03466	6.7244e-32	2.11429	up
MruG036519		2.47023	3.61384	2.63475	6.67716	5.55698	6.39761	1.32083e-06	1.08317	up
MruG001874		6.24956	2.57016	6.57601	0.427994	0.614076	0.402916	2.03907e-21	-2.96368	down
MruG001873		8.29265	10.1272	7.49212	0.697687	0.935071	1.02029	6.57037e-52	-3.09042	down
MruG042533		1.8805	2.24332	1.63867	0.197291	0	0	7.41426e-08	-2.5919	down
MruG031989		0	0	0	0.667065	0.746013	0.61112	3.05968e-15	3.66027	up
MruG031987		0	0	0.038017	7.44309	6.19194	6.09602	5.30547e-97	6.859	up
MruG031984		0	0	0	5.64432	6.28551	5.69464	2.83886e-60	6.26417	up
MruG031985		0.04514	0	0.020666	0.894233	0.964323	0.811651	1.42402e-19	3.70089	up
MruG031834		0.795117	1.32557	1.31296	7.74033	8.42881	8.82943	5.25325e-43	2.76424	up
MruG031324		1.81119	1.1438	1.82033	4.1252	3.65721	3.50056	2.70214e-09	1.2248	up
MruG045568		29.1731	30.4824	28.4553	72.4471	87.0143	95.3848	1.87889e-40	1.55618	up
MruG019140		8.04037	9.90057	7.64809	3.26823	2.44213	3.03039	1.79666e-10	-1.40915	down
MruG024041		2.14845	0.716871	1.3165	3.4072	3.60543	3.12225	0.000710166	1.1481	up
MruG047375		3.56	5.97061	4.0821	9.04462	8.74489	10.3643	1.08745e-08	1.05592	up
MruG032168		3.12875	3.04722	2.76261	1.11506	0.525275	0.509797	3.18627e-05	-1.60678	down
MruG036894		7.28652	6.43167	7.48023	1.6032	1.37342	1.85488	4.15079e-38	-2.02472	down
MruG021946		2.4786	1.72566	2.04234	0.409039	0.51263	0.416092	1.83383e-14	-1.99374	down
MruG021945		0.595579	0.413307	0.49116	1.96574	1.44279	1.89501	3.43529e-07	1.62899	up
MruG021944		0.81391	0.392841	0.206011	3.97061	3.12023	3.00786	7.45391e-14	2.46782	up
MruG019934		1.37149	0.637547	1.21068	0.417233	0.375983	0.477991	0.000468595	-1.13861	down
MruG028150		5.26481	4.70656	4.94673	1.88891	2.11861	1.61933	2.87309e-14	-1.3125	down
MruG020709		1.54903	0.920471	1.32485	0.605256	0.381411	0.295998	0.00526771	-1.17621	down
MruG013987		3.03964	2.34303	2.79678	0.900217	0.949453	1.09306	0.00234275	-1.1717	down
MruG012630		23.9591	26.0227	25.6526	11.7659	9.82833	9.06535	2.73587e-12	-1.2062	down
MruG006102		0.28436	0.312805	0.343899	1.52991	1.27397	1.58879	6.58274e-10	1.96654	up
MruG005536		5.3757	4.62716	4.55057	1.43032	2.55057	1.69642	1.60386e-05	-1.20278	down
MruG032172		2.10992	2.6348	3.03149	0	0	0	2.75505e-14	-3.5692	down
MruG030839		1.86442	1.62076	1.0934	0	0	0	4.4965e-13	-3.43063	down
MruG032175		4.86158	5.25743	4.87676	0	0	0	5.43409e-48	-5.77458	down
MruG012487		48.0248	33.0938	40.4067	18.6015	18.4256	14.17	1.53541e-17	-1.17483	down
MruG039219		2.20684	3.00396	2.74148	0.739603	1.16585	1.21217	0.00953596	-1.05336	down
MruG048176		1.99777	1.94742	1.60366	0.215242	0.259043	0.306934	3.44811e-13	-2.38496	down
MruG030887		3.04976	3.0308	3.49786	0.092592	0	0.206328	1.6454e-10	-2.93923	down
MruG003020		16.7243	15.7005	16.5387	6.81079	4.54453	4.42299	3.09975e-29	-1.54902	down
MruG006612		14.3614	10.6847	10.7626	3.81075	4.62599	3.92101	1.04571e-11	-1.41456	down
MruG042930		65.4492	67.9102	67.1847	24.7039	24.9385	25.8401	1.37214e-88	-1.35581	down
MruG025703		0.670873	0.569914	0.388636	3.01377	2.98648	3.25827	4.15038e-29	2.41334	up
MruG030798		2.73255	1.94638	2.55857	0	0	0	1.17352e-18	-4.00647	down
MruG048986		9.61567	9.96854	8.6731	0.608171	0.78246	0.607574	9.29351e-131	-3.67711	down
MruG022169		1.90338	1.49307	2.00858	0.667158	0.545875	0.672166	1.56801e-05	-1.31261	down
MruG023412		4.08039	3.21914	3.27724	0.237769	0.329684	0.309004	2.88041e-55	-3.36444	down
MruG031826		0.530344	0.48972	0.388688	4.9675	4.4122	5.35731	1.75093e-37	3.15407	up
MruG020140		377.289	385.241	369.879	22.0627	21.5887	23.854	0	-4.00456	down
MruG035029		90.0951	96.4133	83.2953	430.868	400.197	416.403	2.74322e-281	2.2471	up
MruG045240		1.58761	1.55728	1.20672	0.648617	0.608059	0.573257	0.000901523	-1.06278	down
MruG024137		3.41973	3.58757	3.33056	7.47422	5.6627	8.2007	4.6776e-08	1.05092	up
MruG020933		224.865	230.007	238.532	530.919	619.932	655.57	4.53562e-64	1.41881	up
MruG018417		10.4119	9.25286	9.90529	29.6638	28.2815	26.2593	1.23302e-45	1.5373	up
MruG040394		76.4616	69.0342	75.5861	8.06092	8.90058	10.9881	1.86232e-102	-2.87955	down
MruG023081		7.53286	7.81006	8.96729	2.23965	3.02331	2.74929	1.22767e-09	-1.45299	down
MruG029672		7.48602	8.57018	6.99155	3.41891	2.56728	3.20283	1.39705e-18	-1.24723	down
MruG011465		5.40557	6.46778	4.33703	0	0	0	4.75849e-32	-4.97697	down
MruG002800		0.68082	1.17693	1.21567	3.41203	2.81974	2.46563	2.57444e-07	1.41369	up
MruG002802		5.81194	8.03953	7.70993	2.75401	2.55744	2.61092	3.72923e-06	-1.27609	down
MruG040647		0.232132	0.458332	0.538435	1.49535	2.04035	1.64932	4.15168e-08	1.81663	up
MruG006073		21.3976	20.207	20.3204	98.2003	110.667	105.058	1.4934e-128	2.36238	up
MruG002942		0.05124	0.039746	0	0.788354	0.443442	0.418603	2.42028e-10	2.80489	up
MruG043424		10.7632	9.34878	11.5768	21.676	23.666	24.4302	8.17315e-21	1.1638	up
MruG043425		27.3055	22.754	22.5752	46.6723	53.3936	58.294	1.58708e-15	1.1428	up
MruG043427		824.544	791.96	772.344	108.542	130.65	127.804	1.4095e-260	-2.636	down
MruG006380		0.85599	0.914318	0.823517	3.6497	2.53723	3.60109	2.23384e-11	1.78877	up
MruG040218		351.925	348.416	336.804	715.688	695.988	710.92	7.92086e-136	1.07881	up
MruG031704		0.504569	0.548569	0.854879	10.369	8.76914	8.15319	1.24852e-23	3.28034	up
MruG007032		0.300943	0.288809	0.587666	1.86456	1.58433	1.73985	3.57967e-08	1.85294	up
MruG039134		18.7281	16.0238	16.6627	42.2929	45.7505	42.3002	8.29125e-42	1.37393	up
MruG049791		0.706222	1.11008	0.984372	1.94139	2.42522	2.02638	0.000366264	1.10287	up
MruG000564		2.33461	3.45936	3.23698	10.0244	8.63994	9.39629	8.38191e-14	1.58874	up
MruG048823		9.95616	26.3207	16.6427	3.48017	2.86674	7.62896	0.00359586	-1.35453	down
MruG033526		64.4868	65.485	81.4126	17.2216	20.4113	21.3824	1.08755e-34	-1.7567	down
MruG033527		0.872972	0.739581	0	6.12765	4.71843	4.4327	1.74623e-08	2.41015	up
MruG033524		26.0444	27.2773	32.2362	12.5633	12.532	13.7041	2.88471e-09	-1.05864	down
MruG033525		30.7709	37.7783	22.6277	8.80964	5.6116	5.11721	5.10493e-17	-2.01623	down
MruG033523		2.871	2.0371	3.54636	9.27807	8.00999	8.71947	4.13303e-07	1.49171	up
MruG050072		5.25395	6.02022	5.73484	1.00415	2.34408	1.89683	8.03529e-07	-1.4884	down
MruG050077		10.0152	9.30243	9.68454	3.93382	3.71906	2.98724	1.16385e-20	-1.36254	down
MruG048477		0.140225	0.483926	0.372853	1.2716	1.15519	1.12402	0.00047268	1.45625	up
MruG032699		5.42397	7.26863	8.56183	2.48444	1.90129	2.62287	1.71526e-06	-1.39657	down
MruG032698		6.92473	6.287	5.76031	0.765848	1.01697	0.885613	1.92079e-82	-2.72495	down
MruG032694		39.8451	39.5636	41.1102	17.3983	19.766	17.974	3.14663e-36	-1.07268	down
MruG017495		1.22733	1.59773	1.17638	0.478983	0.651999	0.562874	0.000263844	-1.08112	down
MruG029470		2.12618	0.880852	1.43116	0	0.104976	0	1.86738e-10	-2.98779	down
MruG017499		1.06958	1.55617	0.888695	2.89387	2.61531	3.88608	0.000118706	1.27949	up
MruG025961		0	0	0	7.62453	7.07552	5.062	3.11691e-33	5.03445	up
MruG021087		3.74056	4.0035	3.34972	0.890075	0.889605	1.31908	1.69776e-17	-1.71277	down
MruG016365		0.276775	0.647539	0.464125	0.945284	1.82453	0.863826	0.00341504	1.17003	up
MruG018432		1.50036	1.06895	1.57354	5.68155	6.27665	7.63283	4.70487e-12	2.03109	up
MruG008373		11.6677	11.1322	9.91653	3.39048	4.07409	3.40003	1.61261e-25	-1.50701	down
MruG021245		1.93928	1.22044	2.00737	0.312334	0.440577	0.16546	2.54394e-06	-1.87951	down
MruG001338		237.74	255.317	248.268	101.885	118.664	117.789	6.62583e-41	-1.07602	down
MruG003292		5.91892	4.88866	6.05819	2.34671	2.00569	2.57234	1.96117e-13	-1.2002	down
MruG041012		0.782769	0.280235	0.144398	1.781	1.71308	1.17321	0.000451496	1.51791	up
MruG041010		3.57204	3.35058	4.03911	1.66229	1.21202	2.04786	2.03063e-06	-1.04961	down
MruG042398		6.48761	6.16801	6.51456	1.44904	1.09928	1.13362	5.72349e-64	-2.27178	down
MruG028464		8.3493	8.31419	8.18039	25.7002	22.3079	21.8504	5.40986e-59	1.5236	up
MruG028469		2.01625	1.92959	2.14332	1.05922	0.620125	0.968333	0.000483822	-1.0318	down
MruG039579		23.0421	20.7351	21.5301	8.54375	7.43111	8.02116	7.43056e-39	-1.37639	down
MruG038224		2.18743	2.31205	1.86063	7.69122	7.65847	9.44141	2.67387e-23	1.92258	up
MruG038225		4.20994	3.92286	4.4454	9.22954	7.97744	8.35933	7.69954e-12	1.0434	up
MruG018039		3.62872	3.41544	3.76131	10.5065	9.51434	7.42315	1.50991e-19	1.35582	up
MruG043328		1.55145	1.57052	1.54342	0.766885	0.452709	0.413024	0.000423113	-1.24343	down
MruG002585		9.11705	10.8463	12.6424	25.1098	23.0607	28.462	8.80865e-16	1.24274	up
MruG021298		13.6747	14.6897	14.5764	4.89399	6.425	8.47136	0.000111171	-1.00012	down
MruG026852		32.5163	35.942	33.0559	11.0572	10.1162	11.1226	3.48539e-57	-1.58532	down
MruG040000		8.42712	6.92039	7.05226	1.49931	2.00397	3.01308	1.32683e-05	-1.49595	down
MruG046520		3.23061	3.01851	2.57251	10.861	4.95362	4.78927	9.14729e-06	1.17179	up
MruG041759		3.26009	3.80899	3.00959	0.937776	1.00758	1.21261	2.45619e-07	-1.48116	down
MruG046528		14.9599	12.9336	15.201	113.04	41.0939	39.587	5.66828e-05	1.7022	up
MruG049183		18.4652	16.9572	17.2569	60.8364	67.547	76.0148	9.14228e-70	1.97432	up
MruG024544		0.713039	0.696068	0.501422	1.72214	2.29468	1.1898	0.000278384	1.27528	up
MruG024546		1.83568	2.35953	1.872	16.2263	14.9417	15.6483	2.14901e-90	2.91839	up
MruG037146		883.048	895.451	882.74	1841.81	1825.59	1892.62	4.30816e-131	1.10831	up
MruG018623		5.18959	5.69895	4.99254	21.3602	13.7266	14.0499	7.07661e-12	1.57524	up
MruG037303		6.18563	6.24251	6.73874	3.1976	2.19995	2.47333	5.93279e-07	-1.15717	down
MruG035436		0.618849	0.373952	0.190059	5.39904	4.34862	4.75975	3.13345e-28	3.24089	up
MruG035433		5.36211	4.90272	4.798	14.1551	11.8336	9.72425	5.32269e-07	1.20584	up
MruG023127		4.19408	4.22206	3.60164	8.72488	7.41946	8.19139	2.76176e-07	1.02003	up
MruG020475		1.63584	1.76459	2.42643	0.646305	0.600564	0.59468	0.00121754	-1.28802	down
MruG023788		8.04863	10.5915	11.982	23.9883	25.8103	24.2753	6.82664e-13	1.27365	up
MruG023873		1.24702	1.95633	1.59508	3.28041	3.18255	4.31487	0.00745539	1.00689	up
MruG005820		0.653928	0.607461	0.688825	0.071612	0.187517	0	0.000116225	-1.84482	down
MruG000252		6.89771	7.83714	6.63742	3.06399	3.71217	2.82667	4.17484e-06	-1.04534	down
MruG012508		8.39862	9.63082	9.44089	3.21003	3.11557	3.18388	2.82964e-09	-1.39149	down
MruG044470		9.3387	9.07587	8.81608	4.33469	4.04977	3.86415	1.22313e-10	-1.06866	down
MruG018574		0.556434	0.338201	0.775253	2.01676	3.84802	2.19287	5.79866e-07	1.89054	up
MruG004057		0.612363	0.630148	0.577293	1.92008	1.38069	1.27297	0.000307651	1.20507	up
MruG004052		6.93328	5.9519	5.61976	13.9012	14.5532	14.1752	3.70506e-14	1.21385	up
MruG010010		4.65438	4.99888	5.19321	17.9644	17.2608	19.5722	1.30293e-44	1.88878	up
MruG015629		5.41773	8.42635	6.34618	2.60704	2.90321	3.62511	0.000369735	-1.00501	down
MruG040570		6.40446	6.4333	5.46701	1.87807	2.38172	2.21703	3.2991e-07	-1.33204	down
MruG003314		0	0	0	5.96146	4.84157	4.6869	1.58741e-11	3.22466	up
MruG003315		19.9265	14.1254	16.1183	4.74532	4.46478	3.56672	3.40586e-10	-1.74109	down
MruG039433		2.56803	2.06993	2.54282	5.3996	5.65849	5.71161	6.27529e-10	1.21089	up
MruG030718		3.44701	3.45565	4.66544	0	0	0	3.03446e-14	-3.56468	down
MruG022259		0.321038	0.436815	0.19486	4.43028	4.3232	4.55169	5.8834e-36	3.45494	up
MruG022257		13.8263	16.5928	15.7853	68.8857	69.0247	69.3356	1.90846e-156	2.19482	up
MruG038381		4.75179	5.07265	5.81156	1.54974	0.617171	0.512994	1.6851e-05	-1.84092	down
MruG038380		8.59421	9.52201	10.2084	3.06862	2.37231	2.74921	3.19066e-22	-1.67547	down
MruG038387		0.384396	0.976427	1.0298	1.99968	2.02894	2.0291	0.0006953	1.19363	up
MruG000037		0	0	0.210103	3.44469	2.61367	3.20175	0.00927849	1.29671	up
MruG020915		74.3653	79.4766	70.9535	37.9646	32.9072	31.5804	7.49199e-24	-1.07032	down
MruG047951		7.84868	8.10342	5.66523	0.205912	0.260229	0.106902	1.28436e-52	-4.51019	down
MruG021238		8.52475	6.91869	8.61134	18.5143	15.3332	13.605	2.44154e-12	1.00316	up
MruG006412		3.82225	4.66115	3.41493	0	0	0	2.33924e-23	-4.39235	down
MruG006411		1.70497	1.78792	2.0829	0.110404	0.228678	0	4.66153e-07	-2.39975	down
MruG019350		101.6	100.967	98.1436	231.907	201.377	202.832	8.08942e-82	1.12344	up
MruG042047		126.263	130.13	125.655	17.5582	18.3164	19.3777	0	-2.73059	down
MruG034598		10.9626	9.26932	9.76323	4.41007	3.61579	4.25878	3.90019e-16	-1.20691	down
MruG035975		0.863277	1.68282	1.21941	0.564944	0.149422	0.236086	0.000530905	-1.481	down
MruG034623		0.28271	0.678914	0.393752	3.29067	2.45811	2.59781	3.52033e-13	2.30763	up
MruG018867		41.3208	38.7504	36.3324	15.0013	13.0572	13.8613	1.34595e-31	-1.4001	down
MruG026100		1.09318	1.39167	1.29731	2.93687	2.40416	2.92976	8.74463e-06	1.09251	up
MruG014807		1.41245	1.48656	1.53903	0	0	0.020609	6.28912e-36	-5.00985	down
[truncated: 1,320 more rows]

## Sheet: Table S6
Table S6 Up regulated genes in YFM vs PFM
Gene ID	Original Gene ID	COG_class_annotation	GO_annotation	KOG_class	KOG_class_annotation	Pfam_annotation	Swiss-Prot_annotation	NR_annotation	regulated
MruG021526		--	Biological Process: response to auxin (GO:0009733);;	--	--	Auxin responsive protein	Auxin-induced protein 6B OS=Glycine max OX=3847 PE=2 SV=1	SAUR-like auxin-responsive family protein [Medicago truncatula]	up
MruG031825		Carbohydrate transport and metabolism	Molecular Function: UDP-glycosyltransferase activity (GO:0008194);; Cellular Component: intracellular membrane-bounded organelle (GO:0043231);; Molecular Function: quercetin 3-O-glucosyltransferase activity (GO:0080043);; Molecular Function: quercetin 7-O-glucosyltransferase activity (GO:0080044);;	[GC]	Carbohydrate transport and metabolism;; Energy production and conversion	UDP-glucoronosyl and UDP-glucosyl transferase	7-deoxyloganetin glucosyltransferase OS=Gardenia jasminoides OX=114476 GN=UGT85A24 PE=1 SV=1	7-deoxyloganetin glucosyltransferase isoform X1 [Medicago truncatula]	up
MruG022018		--	--	--	--	Reticulon	Reticulon-like protein B17 OS=Arabidopsis thaliana OX=3702 GN=RTNLB17 PE=2 SV=1	LOW QUALITY PROTEIN: reticulon-like protein B18 [Medicago truncatula]	up
MruG014154		Replication, recombination and repair	Biological Process: cell plate assembly (GO:0000919);; Cellular Component: trans-Golgi network (GO:0005802);; Cellular Component: cytosol (GO:0005829);; Biological Process: intra-Golgi vesicle-mediated transport (GO:0006891);; Biological Process: early endosome to Golgi transport (GO:0034498);; Cellular Component: TRAPPII protein complex (GO:1990071);;	[R]	General function prediction only	Rad51	Trafficking protein particle complex II-specific subunit 130 homolog OS=Arabidopsis thaliana OX=3702 GN=TRS130 PE=1 SV=1	trafficking protein particle complex II-specific subunit 130 homolog [Medicago truncatula]	up
MruG049257		--	Molecular Function: protein kinase activity (GO:0004672);; Molecular Function: protein serine/threonine kinase activity (GO:0004674);; Molecular Function: ATP binding (GO:0005524);; Cellular Component: cellular_component (GO:0005575);; Cellular Component: intracellular (GO:0005622);; Cellular Component: cell (GO:0005623);; Cellular Component: cytoplasm (GO:0005737);; Biological Process: protein p…	[R]	General function prediction only	Protein kinase domain	Dual specificity protein kinase YAK1 homolog OS=Arabidopsis thaliana OX=3702 GN=YAK1 PE=1 SV=1	uncharacterized protein LOC25496682 [Medicago truncatula]	up
MruG039813		General function prediction only	Biological Process: defense response (GO:0006952);; Molecular Function: ADP binding (GO:0043531);;	[T]	Signal transduction mechanisms	NB-ARC domain	Putative disease resistance protein RGA1 OS=Solanum bulbocastanum OX=147425 GN=RGA1 PE=2 SV=2	putative disease resistance protein RGA1 [Medicago truncatula]	up
MruG018448		--	Molecular Function: methyltransferase activity (GO:0008168);; Biological Process: methylation (GO:0032259);; Molecular Function: metal ion binding (GO:0046872);; Molecular Function: dioxygenase activity (GO:0051213);; Molecular Function: thebane O-demethylase activity (GO:0102803);; Molecular Function: codeine O-demethylase activity (GO:0102805);;	[QR]	Secondary metabolites biosynthesis, transport and catabolism;; General function prediction only	non-haem dioxygenase in morphine synthesis N-terminal	2-oxoglutarate-dependent dioxygenase 11 OS=Oryza sativa subsp. japonica OX=39947 GN=2ODD11 PE=1 SV=1	codeine O-demethylase [Medicago truncatula]	up
MruG012599		--	Molecular Function: serine-type endopeptidase inhibitor activity (GO:0004867);; Biological Process: response to wounding (GO:0009611);;	--	--	Potato inhibitor I family	Subtilisin inhibitor 1 OS=Phaseolus angularis OX=3914 PE=1 SV=1	subtilisin inhibitor CLSI-I [Medicago truncatula]	up
MruG048477		Lipid transport and metabolism	Biological Process: lipid catabolic process (GO:0016042);; Molecular Function: hydrolase activity, acting on ester bonds (GO:0016788);;	[I]	Lipid transport and metabolism	Partial alpha/beta-hydrolase lipase region	Triacylglycerol lipase 2 OS=Arabidopsis thaliana OX=3702 GN=LIP2 PE=2 SV=1	triacylglycerol lipase-like protein [Medicago truncatula]	up
MruG032779		Coenzyme transport and metabolism	Molecular Function: ethanolamine kinase activity (GO:0004305);;	[M]	Cell wall/membrane/envelope biogenesis	Choline/ethanolamine kinase	Probable choline kinase 2 OS=Arabidopsis thaliana OX=3702 GN=At1g74320 PE=2 SV=1	probable choline kinase 3 [Medicago truncatula]	up
MruG043024		--	Cellular Component: nucleus (GO:0005634);; Biological Process: regulation of transcription, DNA-templated (GO:0006355);; Molecular Function: sequence-specific DNA binding (GO:0043565);;	[K]	Transcription	Homeodomain	Homeobox-leucine zipper protein HAT22 OS=Arabidopsis thaliana OX=3702 GN=HAT22 PE=1 SV=1	homeobox-leucine zipper protein HAT22 [Medicago truncatula]	up
MruG047769		--	Molecular Function: protein binding (GO:0005515);; Cellular Component: cellular_component (GO:0005575);; Cellular Component: intracellular (GO:0005622);; Cellular Component: cell (GO:0005623);; Cellular Component: cytoplasm (GO:0005737);; Cellular Component: chloroplast (GO:0009507);; Cellular Component: plastid (GO:0009536);; Cellular Component: organelle (GO:0043226);; Cellular Component: membr…	--	--	Leucine rich repeat	--	hypothetical protein TSUD_263390 [Trifolium subterraneum]	up
MruG034246		Lipid transport and metabolism	Molecular Function: lanosterol synthase activity (GO:0000250);; Cellular Component: lipid droplet (GO:0005811);; Biological Process: triterpenoid biosynthetic process (GO:0016104);; Molecular Function: beta-amyrin synthase activity (GO:0042300);;	[I]	Lipid transport and metabolism	Squalene-hopene cyclase N-terminal domain	Lupeol synthase OS=Glycyrrhiza glabra OX=49827 GN=LUS1 PE=1 SV=1	Lupeol synthase [Medicago truncatula]	up
MruG018622		--	Cellular Component: plasma membrane (GO:0005886);; Biological Process: signal transduction (GO:0007165);; Cellular Component: secondary cell wall (GO:0009531);; Biological Process: plant-type cell wall organization (GO:0009664);;	[T]	Signal transduction mechanisms	--	Rho GTPase-activating protein 3 OS=Arabidopsis thaliana OX=3702 GN=ROPGAP3 PE=2 SV=1	unknown [Medicago truncatula]	up
MruG029690		--	--	--	--	--	--	hypothetical protein L195_g002369 [Trifolium pratense]	up
MruG019858		--	Molecular Function: DNA binding (GO:0003677);; Molecular Function: transcription factor activity, sequence-specific DNA binding (GO:0003700);; Cellular Component: nucleus (GO:0005634);;	--	--	AP2 domain	Ethylene-responsive transcription factor ERF023 OS=Arabidopsis thaliana OX=3702 GN=ERF023 PE=2 SV=1	putative transcription factor AP2-EREBP family [Medicago truncatula]	up
MruG022694		Secondary metabolites biosynthesis, transport and catabolism;; Defense mechanisms	Molecular Function: iron ion binding (GO:0005506);; Cellular Component: membrane (GO:0016020);; Cellular Component: integral component of membrane (GO:0016021);; Molecular Function: oxidoreductase activity, acting on paired donors, with incorporation or reduction of molecular oxygen, NAD(P)H as one donor, and incorporation of one atom of oxygen (GO:0016709);; Molecular Function: heme binding (GO:…	[Q]	Secondary metabolites biosynthesis, transport and catabolism	Cytochrome P450	Cytochrome P450 82A3 OS=Glycine max OX=3847 GN=CYP82A3 PE=2 SV=1	cytochrome P450 CYP82D47 [Medicago truncatula]	up
MruG039936		--	Molecular Function: UDP-glycosyltransferase activity (GO:0008194);; Cellular Component: intracellular membrane-bounded organelle (GO:0043231);;	[GC]	Carbohydrate transport and metabolism;; Energy production and conversion	UDP-glucoronosyl and UDP-glucosyl transferase	Hydroquinone glucosyltransferase OS=Rauvolfia serpentina OX=4060 GN=AS PE=1 SV=1	hydroquinone glucosyltransferase [Medicago truncatula]	up
MruG050208		--	Molecular Function: DNA binding (GO:0003677);;	--	--	--	Glycine-rich domain-containing protein 1 OS=Arabidopsis thaliana OX=3702 GN=GRDP1 PE=2 SV=1	DNA-binding protein, putative [Medicago truncatula]	up
MruG049644		--	Biological Process: autophagosome assembly (GO:0000045);; Cellular Component: pre-autophagosomal structure (GO:0000407);; Biological Process: protein targeting to vacuole (GO:0006623);; Biological Process: pollen germination (GO:0009846);; Biological Process: defense response to fungus (GO:0050832);;	[T]	Signal transduction mechanisms	--	Beclin-1-like protein OS=Arabidopsis thaliana OX=3702 GN=ATG6 PE=1 SV=2	unknown [Medicago truncatula]	up
MruG008771		Defense mechanisms	Molecular Function: ATP binding (GO:0005524);; Cellular Component: integral component of membrane (GO:0016021);; Molecular Function: ATPase activity (GO:0016887);; Molecular Function: ATPase activity, coupled to transmembrane movement of substances (GO:0042626);;	[Q]	Secondary metabolites biosynthesis, transport and catabolism	ABC transporter transmembrane region	ABC transporter C family member 14 OS=Arabidopsis thaliana OX=3702 GN=ABCC14 PE=1 SV=1	putative xenobiotic-transporting ATPase [Medicago truncatula]	up
MruG013513		Secondary metabolites biosynthesis, transport and catabolism;; Defense mechanisms	Molecular Function: iron ion binding (GO:0005506);; Cellular Component: membrane (GO:0016020);; Cellular Component: integral component of membrane (GO:0016021);; Molecular Function: oxidoreductase activity, acting on paired donors, with incorporation or reduction of molecular oxygen, NAD(P)H as one donor, and incorporation of one atom of oxygen (GO:0016709);; Molecular Function: heme binding (GO:…	[Q]	Secondary metabolites biosynthesis, transport and catabolism	Cytochrome P450	Cytochrome P450 71D11 (Fragment) OS=Lotus japonicus OX=34305 GN=CYP71D11 PE=2 SV=1	cytochrome P450 71D11 [Medicago truncatula]	up
MruG011541		--	--	--	--	--	--	calcium-binding and coiled-coil domain-containing protein 2 [Medicago truncatula]	up
MruG011750		--	Molecular Function: phosphatase activity (GO:0016791);; Molecular Function: metal ion binding (GO:0046872);;	[R]	General function prediction only	Putative Phosphatase	Inorganic pyrophosphatase 2 OS=Arabidopsis thaliana OX=3702 GN=At1g17710 PE=2 SV=1	inorganic pyrophosphatase 1 [Medicago truncatula]	up
MruG019646		--	Biological Process: telomere maintenance (GO:0000723);; Biological Process: double-strand break repair via homologous recombination (GO:0000724);; Cellular Component: nuclear chromosome, telomeric region (GO:0000784);; Molecular Function: damaged DNA binding (GO:0003684);; Molecular Function: single-stranded DNA binding (GO:0003697);; Cellular Component: DNA replication factor A complex (GO:00056…	[L]	Replication, recombination and repair	Domain of unknown function DUF223	--	replication factor-A carboxy-terminal domain protein [Medicago truncatula]	up
MruG035208		--	Molecular Function: peroxidase activity (GO:0004601);; Cellular Component: extracellular region (GO:0005576);; Biological Process: response to oxidative stress (GO:0006979);; Molecular Function: heme binding (GO:0020037);; Biological Process: hydrogen peroxide catabolic process (GO:0042744);; Molecular Function: metal ion binding (GO:0046872);;	--	--	Peroxidase	Peroxidase 55 OS=Arabidopsis thaliana OX=3702 GN=PER55 PE=1 SV=1	peroxidase [Medicago sativa]	up
MruG036013		--	Cellular Component: integral component of membrane (GO:0016021);; Molecular Function: kinase activity (GO:0016301);;	[R]	General function prediction only	Leucine rich repeat	Receptor-like protein 13 OS=Arabidopsis thaliana OX=3702 GN=RLP13 PE=3 SV=1	receptor-like protein 13 isoform X1 [Medicago truncatula]	up
MruG029303		--	Molecular Function: structural constituent of ribosome (GO:0003735);; Biological Process: translation (GO:0006412);; Cellular Component: large ribosomal subunit (GO:0015934);;	--	--	Ribosomal L32p protein family	--	uncharacterized protein LOC11415311 isoform X2 [Medicago truncatula]	up
MruG041951		Lipid transport and metabolism	Molecular Function: C-4 methylsterol oxidase activity (GO:0000254);; Molecular Function: iron ion binding (GO:0005506);; Cellular Component: endoplasmic reticulum membrane (GO:0005789);; Cellular Component: membrane (GO:0016020);; Cellular Component: integral component of membrane (GO:0016021);; Biological Process: sterol biosynthetic process (GO:0016126);; Molecular Function: oxidoreductase acti…	[I]	Lipid transport and metabolism	Fatty acid hydroxylase superfamily	Methylsterol monooxygenase 2-2 OS=Arabidopsis thaliana OX=3702 GN=SMO2-2 PE=2 SV=1	methylsterol monooxygenase 2-2 [Medicago truncatula]	up
MruG016042		Carbohydrate transport and metabolism	Cellular Component: integral component of membrane (GO:0016021);; Molecular Function: transmembrane transporter activity (GO:0022857);;	[R]	General function prediction only	Major Facilitator Superfamily	Protein ZINC INDUCED FACILITATOR 1 OS=Arabidopsis thaliana OX=3702 GN=ZIF1 PE=1 SV=2	protein ZINC INDUCED FACILITATOR 1-like [Cicer arietinum]	up
MruG000103		--	--	--	--	Gibberellin regulated protein	Gibberellin-regulated protein 1 OS=Arabidopsis thaliana OX=3702 GN=GASA1 PE=2 SV=2	gibberellin-regulated protein 1 [Medicago truncatula]	up
MruG042789		--	Cellular Component: integral component of membrane (GO:0016021);;	--	--	--	--	hypothetical protein MtrDRAFT_AC183371g21v1 [Medicago truncatula]	up
MruG025041		--	Molecular Function: DNA binding (GO:0003677);; Cellular Component: nucleus (GO:0005634);;	--	--	Myb-like DNA-binding domain	Transcription factor KUA1 OS=Arabidopsis thaliana OX=3702 GN=KUA1 PE=1 SV=1	unknown [Medicago truncatula]	up
MruG038712		Defense mechanisms	Molecular Function: ATP binding (GO:0005524);; Cellular Component: plasma membrane (GO:0005886);; Cellular Component: integral component of membrane (GO:0016021);; Molecular Function: ATPase activity (GO:0016887);; Molecular Function: ATPase activity, coupled to transmembrane movement of substances (GO:0042626);; Biological Process: transmembrane transport (GO:0055085);;	[Q]	Secondary metabolites biosynthesis, transport and catabolism	ABC-2 type transporter	ABC transporter G family member 22 OS=Arabidopsis thaliana OX=3702 GN=ABCG22 PE=1 SV=1	ABC transporter G family member 22 isoform X1 [Medicago truncatula]	up
MruG039933		--	Molecular Function: UDP-glycosyltransferase activity (GO:0008194);; Cellular Component: intracellular membrane-bounded organelle (GO:0043231);;	[GC]	Carbohydrate transport and metabolism;; Energy production and conversion	UDP-glucoronosyl and UDP-glucosyl transferase	Hydroquinone glucosyltransferase OS=Rauvolfia serpentina OX=4060 GN=AS PE=1 SV=1	UDP-glucosyltransferase family protein [Medicago truncatula]	up
MruG003411		--	Cellular Component: exocyst (GO:0000145);; Biological Process: exocytosis (GO:0006887);;	[U]	Intracellular trafficking, secretion, and vesicular transport	--	Exocyst complex component EXO84C OS=Arabidopsis thaliana OX=3702 GN=EXO84C PE=2 SV=1	exocyst complex component EXO84B [Medicago truncatula]	up
MruG032766		--	Molecular Function: UDP-glycosyltransferase activity (GO:0008194);; Molecular Function: soyasaponin III rhamnosyltransferase activity (GO:0102241);;	[GC]	Carbohydrate transport and metabolism;; Energy production and conversion	UDP-glucoronosyl and UDP-glucosyl transferase	Soyasaponin III rhamnosyltransferase OS=Glycine max OX=3847 GN=GmSGT3 PE=1 SV=1	soyasaponin III rhamnosyltransferase-like [Medicago truncatula]	up
MruG031704		Coenzyme transport and metabolism	Molecular Function: farnesyltranstransferase activity (GO:0004311);; Molecular Function: prenyltransferase activity (GO:0004659);;	[H]	Coenzyme transport and metabolism	--	Putative geranylgeranyl pyrophosphate synthase 8, chloroplastic OS=Arabidopsis thaliana OX=3702 GN=At3g14510 PE=5 SV=2	heterodimeric geranylgeranyl pyrophosphate synthase small subunit, chloroplastic [Medicago truncatula]	up
MruG003076		--	Biological Process: carbohydrate metabolic process (GO:0005975);; Molecular Function: glucan endo-1,3-beta-D-glucosidase activity (GO:0042973);; Cellular Component: anchored component of plasma membrane (GO:0046658);;	--	--	Glycosyl hydrolases family 17	Glucan endo-1,3-beta-glucosidase 12 OS=Arabidopsis thaliana OX=3702 GN=At4g29360 PE=2 SV=1	glucan endo-1,3-beta-glucosidase 14 [Medicago truncatula]	up
MruG039190		--	Molecular Function: microtubule motor activity (GO:0003777);; Molecular Function: ATP binding (GO:0005524);; Cellular Component: kinesin complex (GO:0005871);; Cellular Component: microtubule (GO:0005874);; Biological Process: microtubule-based movement (GO:0007018);; Molecular Function: microtubule binding (GO:0008017);; Molecular Function: ATPase activity (GO:0016887);;	[Z]	Cytoskeleton	Kinesin motor domain	Kinesin-like protein KIN-14S OS=Arabidopsis thaliana OX=3702 GN=KIN14S PE=3 SV=1	kinesin-like protein KIN-14S [Medicago truncatula]	up
MruG038446		Translation, ribosomal structure and biogenesis	Biological Process: ribosomal large subunit assembly (GO:0000027);; Molecular Function: ATP binding (GO:0005524);; Cellular Component: nucleus (GO:0005634);; Molecular Function: ATPase activity (GO:0016887);;	[R]	General function prediction only	AAA domain (dynein-related subfamily)	Midasin OS=Arabidopsis thaliana OX=3702 GN=MDN1 PE=1 SV=1	LOW QUALITY PROTEIN: midasin [Cicer arietinum]	up
MruG040045		--	--	--	--	--	--	hypothetical protein MtrunA17_Chr7g0227051 [Medicago truncatula]	up
MruG044574		Lipid transport and metabolism;; General function prediction only	Molecular Function: triglyceride lipase activity (GO:0004806);;	--	--	GDSL-like Lipase/Acylhydrolase	GDSL esterase/lipase At4g16230 OS=Arabidopsis thaliana OX=3702 GN=At4g16230 PE=3 SV=2	GDSL esterase/lipase At4g16230 [Medicago truncatula]	up
MruG028518		--	Molecular Function: UDP-glycosyltransferase activity (GO:0008194);; Cellular Component: intracellular membrane-bounded organelle (GO:0043231);;	[GC]	Carbohydrate transport and metabolism;; Energy production and conversion	UDP-glucoronosyl and UDP-glucosyl transferase	UDP-glycosyltransferase 73C2 OS=Arabidopsis thaliana OX=3702 GN=UGT73C2 PE=3 SV=1	UDP-glycosyltransferase 73C3 [Medicago truncatula]	up
MruG014911		--	Molecular Function: phosphatidylinositol phospholipase C activity (GO:0004435);; Biological Process: lipid catabolic process (GO:0016042);; Biological Process: phosphatidylinositol-mediated signaling (GO:0048015);; Biological Process: release of sequestered calcium ion into cytosol (GO:0051209);;	[T]	Signal transduction mechanisms	Phosphatidylinositol-specific phospholipase C, X domain	Phosphoinositide phospholipase C 2 OS=Arabidopsis thaliana OX=3702 GN=PLC2 PE=1 SV=1	phosphoinositide phospholipase C 2 isoform X1 [Medicago truncatula]	up
MruG017539		Amino acid transport and metabolism;; Signal transduction mechanisms	Molecular Function: ligand-gated ion channel activity (GO:0015276);; Cellular Component: integral component of membrane (GO:0016021);;	[PET]	Inorganic ion transport and metabolism;; Amino acid transport and metabolism;; Signal transduction mechanisms	Receptor family ligand binding region	Glutamate receptor 2.7 OS=Arabidopsis thaliana OX=3702 GN=GLR2.7 PE=2 SV=3	glutamate receptor 2.7 [Medicago truncatula]	up
MruG040245		General function prediction only	Cellular Component: chloroplast (GO:0009507);; Cellular Component: chloroplast thylakoid membrane (GO:0009535);;	--	--	NAD(P)H-binding	Uncharacterized protein At2g37660, chloroplastic OS=Arabidopsis thaliana OX=3702 GN=At2g37660 PE=1 SV=2	uncharacterized protein At5g02240 isoform X1 [Medicago truncatula]	up
MruG019724		--	Molecular Function: peroxidase activity (GO:0004601);; Cellular Component: extracellular region (GO:0005576);; Biological Process: response to oxidative stress (GO:0006979);; Cellular Component: integral component of membrane (GO:0016021);; Molecular Function: heme binding (GO:0020037);; Biological Process: hydrogen peroxide catabolic process (GO:0042744);; Molecular Function: metal ion binding (…	--	--	Peroxidase	Peroxidase 17 OS=Arabidopsis thaliana OX=3702 GN=PER17 PE=2 SV=1	peroxidase 17 [Medicago truncatula]	up
MruG044426		--	Molecular Function: ATP transmembrane transporter activity (GO:0005347);; Molecular Function: thiamine transmembrane transporter activity (GO:0015234);; Biological Process: thiamine pyrophosphate transport (GO:0030974);; Cellular Component: integral component of mitochondrial inner membrane (GO:0031305);;	[C]	Energy production and conversion	Mitochondrial carrier protein	Mitochondrial thiamine diphosphate carrier 2 OS=Arabidopsis thaliana OX=3702 GN=At5g48970 PE=2 SV=1	mitochondrial thiamine diphosphate carrier 2 [Medicago truncatula]	up
MruG009744		--	Cellular Component: integral component of membrane (GO:0016021);;	[R]	General function prediction only	Leucine rich repeat	Receptor-like protein EIX1 OS=Solanum lycopersicum OX=4081 GN=EIX1 PE=2 SV=2	putative leucine-rich repeat-containing, plant-type, leucine-rich repeat domain, L [Medicago truncatula]	up
MruG050032		Translation, ribosomal structure and biogenesis	Molecular Function: translation release factor activity (GO:0003747);; Cellular Component: ribosome (GO:0005840);;	[J]	Translation, ribosomal structure and biogenesis	eRF1 domain 2	Eukaryotic peptide chain release factor subunit 1-3 OS=Arabidopsis thaliana OX=3702 GN=ERF1-3 PE=1 SV=1	putative 50S ribosomal protein L30e [Medicago truncatula]	up
MruG050007		--	Molecular Function: cysteine-type peptidase activity (GO:0008234);;	--	--	--	--	putative Ulp1 protease family catalytic domain-containing protein [Medicago truncatula]	up
MruG041493		--	Biological Process: defense response (GO:0006952);;	--	--	Pathogenesis-related protein Bet v 1 family	Major latex protein 146 OS=Papaver somniferum OX=3469 GN=MLP146 PE=2 SV=1	MLP-like protein 28 [Medicago truncatula]	up
MruG002778		--	Cellular Component: extracellular region (GO:0005576);; Biological Process: defense response (GO:0006952);;	--	--	Thaumatin family	Thaumatin-like protein 1a OS=Malus domestica OX=3750 GN=TL1 PE=1 SV=1	thaumatin-like protein 1b [Medicago truncatula]	up
MruG027010		--	Molecular Function: protein binding (GO:0005515);;	--	--	Leucine Rich repeat	--	uncharacterized protein LOC11441496 isoform X1 [Medicago truncatula]	up
MruG030863		Carbohydrate transport and metabolism;; Lipid transport and metabolism	Molecular Function: pectinesterase activity (GO:0030599);; Biological Process: cell wall modification (GO:0042545);; Molecular Function: aspartyl esterase activity (GO:0045330);; Biological Process: pectin catabolic process (GO:0045490);; Molecular Function: carboxylic ester hydrolase activity (GO:0052689);;	--	--	Pectinesterase	Putative pectinesterase 10 OS=Arabidopsis thaliana OX=3702 GN=PME10 PE=2 SV=1	pectinesterase [Medicago truncatula]	up
MruG000327		--	Molecular Function: single-stranded DNA binding (GO:0003697);; Cellular Component: mitochondrion (GO:0005739);; Biological Process: mitochondrial DNA replication (GO:0006264);; Cellular Component: nucleoid (GO:0009295);; Cellular Component: mitochondrial nucleoid (GO:0042645);; Biological Process: positive regulation of helicase activity (GO:0051096);;	--	--	Single-strand binding protein family	Protein OSB1, mitochondrial OS=Arabidopsis thaliana OX=3702 GN=OSB1 PE=1 SV=1	protein OSB1, mitochondrial [Medicago truncatula]	up
MruG003184		--	Cellular Component: DNA-directed RNA polymerase complex (GO:0000428);; Biological Process: regulation of cytokine production (GO:0001817);; Biological Process: positive regulation of cytokine production (GO:0001819);; Biological Process: regulation of immune system process (GO:0002682);; Biological Process: positive regulation of immune system process (GO:0002684);; Molecular Function: molecular_…	--	--	Reverse transcriptase-like	--	ribonuclease H [Trifolium pratense]	up
MruG026246		Carbohydrate transport and metabolism	Biological Process: polysaccharide catabolic process (GO:0000272);; Molecular Function: beta-amylase activity (GO:0016161);; Molecular Function: amylopectin maltohydrolase activity (GO:0102229);;	--	--	Glycosyl hydrolase family 14	Beta-amylase 3, chloroplastic OS=Arabidopsis thaliana OX=3702 GN=BAM3 PE=1 SV=3	beta-amylase 3, chloroplastic [Medicago truncatula]	up
MruG015302		--	Molecular Function: lipoprotein lipase activity (GO:0004465);; Biological Process: lipid catabolic process (GO:0016042);;	[IOT]	Lipid transport and metabolism;; Posttranslational modification, protein turnover, chaperones;; Signal transduction mechanisms	Cyclophilin type peptidyl-prolyl cis-trans isomerase/CLD	Peptidyl-prolyl cis-trans isomerase CYP95 OS=Arabidopsis thaliana OX=3702 GN=CYP95 PE=1 SV=2	uncharacterized protein LOC112417470 [Medicago truncatula]	up
MruG049612		Energy production and conversion	Molecular Function: cytochrome-c oxidase activity (GO:0004129);; Cellular Component: mitochondrion (GO:0005739);; Cellular Component: integral component of membrane (GO:0016021);; Biological Process: aerobic electron transport chain (GO:0019646);;	[C]	Energy production and conversion	Cytochrome c oxidase subunit III	Cytochrome c oxidase subunit 3 OS=Vicia faba OX=3906 GN=COX3 PE=3 SV=1	cytochrome c oxidase subunit 3 [Medicago sativa]	up
MruG022257		--	Molecular Function: UDP-glycosyltransferase activity (GO:0008194);;	[GC]	Carbohydrate transport and metabolism;; Energy production and conversion	UDP-glucoronosyl and UDP-glucosyl transferase	UDP-glycosyltransferase 708D1 OS=Glycine max OX=3847 GN=UGT708D1 PE=1 SV=1	putative UDP-glucuronosyl/UDP-glucosyltransferase [Medicago truncatula]	up
MruG031984		--	Cellular Component: integral component of membrane (GO:0016021);; Molecular Function: kinase activity (GO:0016301);;	[R]	General function prediction only	Leucine rich repeat	Receptor-like protein 32 OS=Arabidopsis thaliana OX=3702 GN=RLP32 PE=2 SV=1	leucine-rich receptor-like kinase family protein, putative [Medicago truncatula]	up
MruG035810		Signal transduction mechanisms	Biological Process: defense response to oomycetes (GO:0002229);; Molecular Function: transmembrane receptor protein serine/threonine kinase activity (GO:0004675);; Molecular Function: ATP binding (GO:0005524);; Cellular Component: plasma membrane (GO:0005886);; Biological Process: defense response (GO:0006952);; Cellular Component: integral component of membrane (GO:0016021);; Molecular Function:…	--	--	Legume lectin domain	L-type lectin-domain containing receptor kinase IV.1 OS=Arabidopsis thaliana OX=3702 GN=LECRK41 PE=2 SV=1	L-type lectin-domain containing receptor kinase IV.1 [Medicago truncatula]	up
MruG005022		Translation, ribosomal structure and biogenesis	Molecular Function: translation elongation factor activity (GO:0003746);; Molecular Function: GTPase activity (GO:0003924);; Molecular Function: GTP binding (GO:0005525);;	[J]	Translation, ribosomal structure and biogenesis	Elongation factor Tu C-terminal domain	Elongation factor 1-alpha OS=Oryza sativa subsp. japonica OX=39947 GN=REFA1 PE=2 SV=2	GTP-binding elongation factor Tu family protein [Medicago truncatula]	up
MruG019702		--	Molecular Function: structural constituent of cell wall (GO:0005199);;	--	--	Extensin-like protein repeat	--	--	up
MruG020880		Secondary metabolites biosynthesis, transport and catabolism;; Defense mechanisms	Molecular Function: monooxygenase activity (GO:0004497);; Molecular Function: iron ion binding (GO:0005506);; Molecular Function: oxidoreductase activity, acting on paired donors, with incorporation or reduction of molecular oxygen (GO:0016705);; Molecular Function: heme binding (GO:0020037);;	[Q]	Secondary metabolites biosynthesis, transport and catabolism	Cytochrome P450	Licodione synthase OS=Glycyrrhiza echinata OX=46348 GN=CYP93B1 PE=1 SV=2	putative cytochrome P450 [Medicago truncatula]	up
MruG045968		Posttranslational modification, protein turnover, chaperones	Cellular Component: mitochondrion (GO:0005739);; Molecular Function: electron carrier activity (GO:0009055);; Molecular Function: protein disulfide oxidoreductase activity (GO:0015035);; Molecular Function: transferase activity (GO:0016740);; Biological Process: cell redox homeostasis (GO:0045454);; Molecular Function: prostaglandin-E synthase activity (GO:0050220);;	[R]	General function prediction only	Glutaredoxin	--	prostaglandin E synthase 2 [Medicago truncatula]	up
MruG038225		--	Molecular Function: phosphatidylinositol-4,5-bisphosphate 5-phosphatase activity (GO:0004439);; Molecular Function: phosphatidylinositol-3,4,5-trisphosphate 5-phosphatase activity (GO:0034485);; Biological Process: phosphatidylinositol dephosphorylation (GO:0046856);;	[U]	Intracellular trafficking, secretion, and vesicular transport	Endonuclease/Exonuclease/phosphatase family	Type I inositol polyphosphate 5-phosphatase 8 OS=Arabidopsis thaliana OX=3702 GN=IP5P8 PE=2 SV=1	type I inositol polyphosphate 5-phosphatase 8 isoform X4 [Medicago truncatula]	up
MruG044663		Defense mechanisms	Molecular Function: ATP binding (GO:0005524);; Cellular Component: integral component of membrane (GO:0016021);; Molecular Function: ATPase activity (GO:0016887);; Molecular Function: ATPase activity, coupled to transmembrane movement of substances (GO:0042626);; Biological Process: transmembrane transport (GO:0055085);;	[Q]	Secondary metabolites biosynthesis, transport and catabolism	ABC transporter transmembrane region	ABC transporter B family member 11 OS=Arabidopsis thaliana OX=3702 GN=ABCB11 PE=2 SV=1	ABC transporter B family member 3 isoform X1 [Medicago truncatula]	up
MruG008293		--	Molecular Function: peroxidase activity (GO:0004601);; Cellular Component: extracellular region (GO:0005576);; Biological Process: response to oxidative stress (GO:0006979);; Molecular Function: heme binding (GO:0020037);; Biological Process: hydrogen peroxide catabolic process (GO:0042744);; Molecular Function: metal ion binding (GO:0046872);;	--	--	Peroxidase	Peroxidase 15 OS=Ipomoea batatas OX=4120 GN=pod PE=1 SV=1	peroxidase 15 isoform X1 [Medicago truncatula]	up
MruG039743		Defense mechanisms	Molecular Function: ATP binding (GO:0005524);; Cellular Component: integral component of membrane (GO:0016021);; Molecular Function: ATPase activity (GO:0016887);; Molecular Function: ATPase activity, coupled to transmembrane movement of substances (GO:0042626);;	[Q]	Secondary metabolites biosynthesis, transport and catabolism	ABC transporter	ABC transporter C family member 9 OS=Arabidopsis thaliana OX=3702 GN=ABCC9 PE=2 SV=2	putative xenobiotic-transporting ATPase [Medicago truncatula]	up
MruG030982		--	Cellular Component: integral component of membrane (GO:0016021);;	--	--	--	--	transmembrane protein, putative [Medicago truncatula]	up
MruG047173		Lipid transport and metabolism	Biological Process: lipid catabolic process (GO:0016042);; Molecular Function: hydrolase activity, acting on ester bonds (GO:0016788);;	[I]	Lipid transport and metabolism	Partial alpha/beta-hydrolase lipase region	Triacylglycerol lipase 2 OS=Arabidopsis thaliana OX=3702 GN=LIP2 PE=2 SV=1	triacylglycerol lipase 2 [Medicago truncatula]	up
MruG001924		--	--	--	--	--	--	uncharacterized protein LOC25480955 [Medicago truncatula]	up
MruG023263		--	Molecular Function: oxidoreductase activity (GO:0016491);; Molecular Function: FAD binding (GO:0071949);;	--	--	FAD binding domain	Berberine bridge enzyme-like 21 OS=Arabidopsis thaliana OX=3702 GN=At4g20840 PE=2 SV=1	berberine bridge enzyme-like 21 [Medicago truncatula]	up
MruG008479		Energy production and conversion;; General function prediction only	Molecular Function: 2-alkenal reductase [NAD(P)] activity (GO:0032440);;	[CR]	Energy production and conversion;; General function prediction only	Protein tyrosine and serine/threonine kinase	Serine/threonine-protein kinase CTR1 OS=Arabidopsis thaliana OX=3702 GN=CTR1 PE=1 SV=1	reticulon-4-interacting protein 1, mitochondrial [Medicago truncatula]	up
MruG045910		Inorganic ion transport and metabolism	Molecular Function: calcium-transporting ATPase activity (GO:0005388);; Molecular Function: ATP binding (GO:0005524);; Cellular Component: integral component of membrane (GO:0016021);; Molecular Function: hydrolase activity (GO:0016787);; Molecular Function: cation-transporting ATPase activity (GO:0019829);; Cellular Component: intracellular membrane-bounded organelle (GO:0043231);;	[P]	Inorganic ion transport and metabolism	Cation transporting ATPase, C-terminus	Putative calcium-transporting ATPase 13, plasma membrane-type OS=Arabidopsis thaliana OX=3702 GN=ACA13 PE=3 SV=1	putative calcium-transporting ATPase 13, plasma membrane-type [Medicago truncatula]	up
MruG020425		Translation, ribosomal structure and biogenesis	Molecular Function: GTPase activity (GO:0003924);; Molecular Function: GTP binding (GO:0005525);; Cellular Component: cytosol (GO:0005829);;	[R]	General function prediction only	50S ribosome-binding GTPase	GTPase LSG1-2 OS=Arabidopsis thaliana OX=3702 GN=LSG1-2 PE=1 SV=1	GTPase LSG1-1 [Medicago truncatula]	up
MruG036187		Inorganic ion transport and metabolism	Molecular Function: ferroxidase activity (GO:0004322);; Molecular Function: iron ion binding (GO:0005506);; Cellular Component: cytoplasm (GO:0005737);; Biological Process: iron ion transport (GO:0006826);; Biological Process: intracellular sequestering of iron ion (GO:0006880);; Molecular Function: ferrous iron binding (GO:0008198);; Molecular Function: ferric iron binding (GO:0008199);;	[P]	Inorganic ion transport and metabolism	Ferritin-like domain	Ferritin-1, chloroplastic OS=Pisum sativum OX=3888 PE=1 SV=2	ferritin-1, chloroplastic [Medicago truncatula]	up
MruG041429		Posttranslational modification, protein turnover, chaperones	Molecular Function: zinc ion binding (GO:0008270);;	--	--	Hsp70 protein	Heat shock cognate 70 kDa protein 2 OS=Solanum lycopersicum OX=4081 GN=HSC-2 PE=2 SV=1	uncharacterized protein LOC101498464 isoform X2 [Cicer arietinum]	up
MruG012857		--	Cellular Component: integral component of membrane (GO:0016021);;	--	--	--	--	transmembrane protein, putative [Medicago truncatula]	up
MruG046527		--	--	--	--	Gibberellin regulated protein	Gibberellin-regulated protein 1 OS=Arabidopsis thaliana OX=3702 GN=GASA1 PE=2 SV=2	snakin-2 [Medicago truncatula]	up
MruG039259		--	Molecular Function: transferase activity, transferring acyl groups other than amino-acyl groups (GO:0016747);;	--	--	Transferase family	Benzyl alcohol O-benzoyltransferase OS=Nicotiana tabacum OX=4097 GN=HSR201 PE=1 SV=1	benzyl alcohol O-benzoyltransferase [Medicago truncatula]	up
MruG044265		Translation, ribosomal structure and biogenesis	Cellular Component: mitochondrion (GO:0005739);; Biological Process: tRNA modification (GO:0006400);; Biological Process: cytokinin biosynthetic process (GO:0009691);; Molecular Function: tRNA dimethylallyltransferase activity (GO:0052381);;	[J]	Translation, ribosomal structure and biogenesis	IPP transferase	Adenylate isopentenyltransferase 5, chloroplastic OS=Arabidopsis thaliana OX=3702 GN=IPT5 PE=1 SV=2	adenylate isopentenyltransferase 5, chloroplastic isoform X1 [Medicago truncatula]	up
MruG042247		--	--	--	--	Neprosin	--	uncharacterized protein LOC25501462 [Medicago truncatula]	up
MruG018120		Amino acid transport and metabolism	Biological Process: oligopeptide transport (GO:0006857);; Cellular Component: integral component of membrane (GO:0016021);; Molecular Function: hydrolase activity (GO:0016787);; Molecular Function: transmembrane transporter activity (GO:0022857);;	[E]	Amino acid transport and metabolism	POT family	Protein NRT1/ PTR FAMILY 8.1 OS=Arabidopsis thaliana OX=3702 GN=NPF8.1 PE=1 SV=1	putative peptide-transporting ATPase [Medicago truncatula]	up
MruG013188		Secondary metabolites biosynthesis, transport and catabolism	Molecular Function: metal ion binding (GO:0046872);; Molecular Function: dioxygenase activity (GO:0051213);;	[QR]	Secondary metabolites biosynthesis, transport and catabolism;; General function prediction only	2OG-Fe(II) oxygenase superfamily	Feruloyl CoA ortho-hydroxylase F6H1-3 OS=Ipomoea batatas OX=4120 GN=F6H1-3 PE=1 SV=1	unknown [Medicago truncatula]	up
MruG039258		--	Molecular Function: transferase activity, transferring acyl groups other than amino-acyl groups (GO:0016747);;	--	--	Transferase family	Benzyl alcohol O-benzoyltransferase OS=Nicotiana tabacum OX=4097 GN=HSR201 PE=1 SV=1	benzyl alcohol O-benzoyltransferase [Medicago truncatula]	up
MruG008832		Secondary metabolites biosynthesis, transport and catabolism	Molecular Function: methyltransferase activity (GO:0008168);; Biological Process: methylation (GO:0032259);; Molecular Function: metal ion binding (GO:0046872);; Molecular Function: dioxygenase activity (GO:0051213);; Molecular Function: thebane O-demethylase activity (GO:0102803);; Molecular Function: codeine O-demethylase activity (GO:0102805);;	[QR]	Secondary metabolites biosynthesis, transport and catabolism;; General function prediction only	non-haem dioxygenase in morphine synthesis N-terminal	Protein SRG1 OS=Arabidopsis thaliana OX=3702 GN=SRG1 PE=2 SV=1	protein SRG1 [Medicago truncatula]	up
MruG047375		Defense mechanisms	Molecular Function: antiporter activity (GO:0015297);; Cellular Component: membrane (GO:0016020);; Cellular Component: integral component of membrane (GO:0016021);; Molecular Function: transmembrane transporter activity (GO:0022857);; Molecular Function: xenobiotic transporter activity (GO:0042910);;	[R]	General function prediction only	MatE	Protein DETOXIFICATION 55 OS=Arabidopsis thaliana OX=3702 GN=DTX55 PE=2 SV=1	protein DETOXIFICATION 55 [Medicago truncatula]	up
MruG047353		--	Cellular Component: integral component of membrane (GO:0016021);;	--	--	--	--	transmembrane protein, putative [Medicago truncatula]	up
MruG003752		--	Cellular Component: plasma membrane (GO:0005886);; Cellular Component: membrane (GO:0016020);; Cellular Component: integral component of membrane (GO:0016021);;	--	--	Domain of unknown function (DUF588)	CASP-like protein 5B3 OS=Arabidopsis thaliana OX=3702 GN=At3g23200 PE=2 SV=1	CASP-like protein 5B3 [Medicago truncatula]	up
MruG014405		Secondary metabolites biosynthesis, transport and catabolism;; Defense mechanisms	Molecular Function: monooxygenase activity (GO:0004497);; Molecular Function: iron ion binding (GO:0005506);; Molecular Function: oxidoreductase activity, acting on paired donors, with incorporation or reduction of molecular oxygen (GO:0016705);; Molecular Function: heme binding (GO:0020037);;	[QI]	Secondary metabolites biosynthesis, transport and catabolism;; Lipid transport and metabolism	Cytochrome P450	Taxadiene 5-alpha hydroxylase OS=Taxus cuspidata OX=99806 PE=1 SV=2	taxadiene 5-alpha hydroxylase [Medicago truncatula]	up
MruG018062		General function prediction only	Molecular Function: oxidoreductase activity (GO:0016491);;	--	--	NmrA-like family	Phenylcoumaran benzylic ether reductase Betv6 OS=Betula pendula OX=3505 GN=BETV6 PE=1 SV=1	isoflavone reductase homolog PCBER [Medicago truncatula]	up
MruG018574		--	Molecular Function: kinase activity (GO:0016301);;	[R]	General function prediction only	Leucine rich repeat	Receptor-like protein 47 OS=Arabidopsis thaliana OX=3702 GN=RLP47 PE=3 SV=2	hypothetical protein TSUD_297950 [Trifolium subterraneum]	up
MruG016365		--	Molecular Function: molecular_function (GO:0003674);; Molecular Function: nucleic acid binding (GO:0003676);; Molecular Function: DNA binding (GO:0003677);; Molecular Function: transcription factor activity, sequence-specific DNA binding (GO:0003700);; Molecular Function: binding (GO:0005488);; Cellular Component: cellular_component (GO:0005575);; Cellular Component: intracellular (GO:0005622);; …	--	--	GRAS domain family	Scarecrow-like protein 1 OS=Arabidopsis thaliana OX=3702 GN=SCL1 PE=2 SV=1	scarecrow-like protein 1 [Medicago truncatula]	up
MruG024546		--	Biological Process: amino acid transmembrane transport (GO:0003333);; Cellular Component: plasma membrane (GO:0005886);; Molecular Function: amino acid transmembrane transporter activity (GO:0015171);; Cellular Component: integral component of membrane (GO:0016021);;	[E]	Amino acid transport and metabolism	Transmembrane amino acid transporter protein	Amino acid permease 2 OS=Arabidopsis thaliana OX=3702 GN=AAP2 PE=1 SV=1	transmembrane amino acid transporter family protein [Medicago truncatula]	up
MruG024386		--	Molecular Function: DNA binding (GO:0003677);; Molecular Function: endonuclease activity (GO:0004519);; Cellular Component: nucleus (GO:0005634);; Biological Process: DNA repair (GO:0006281);; Biological Process: response to UV (GO:0009411);; Biological Process: response to high light intensity (GO:0009644);; Biological Process: response to gamma radiation (GO:0010332);; Cellular Component: Holli…	--	--	ERCC4 domain	Crossover junction endonuclease EME1B OS=Arabidopsis thaliana OX=3702 GN=EME1B PE=1 SV=1	crossover junction endonuclease EME1 [Medicago truncatula]	up
MruG021889		Cell wall/membrane/envelope biogenesis	Molecular Function: oxidoreductase activity (GO:0016491);; Molecular Function: oxidoreductase activity, acting on the CH-OH group of donors, NAD or NADP as acceptor (GO:0016616);;	[V]	Defense mechanisms	NAD dependent epimerase/dehydratase family	Phenylacetaldehyde reductase OS=Rosa hybrid cultivar OX=128735 GN=PAR PE=1 SV=1	cinnamoyl-CoA reductase 2 [Medicago truncatula]	up
MruG024872		--	--	--	--	--	Putative lipoxygenase 5 OS=Oryza sativa subsp. japonica OX=39947 GN=Os04g0447100 PE=3 SV=2	--	up
MruG017735		--	Molecular Function: ubiquitin activating enzyme activity (GO:0004839);; Molecular Function: zinc ion binding (GO:0008270);; Molecular Function: transferase activity, transferring acyl groups (GO:0016746);;	[R]	General function prediction only	Zinc-ribbon	Probable E3 ubiquitin-protein ligase RZFP34 OS=Oryza sativa subsp. japonica OX=39947 GN=RZFP34 PE=2 SV=1	putative aminoacyltransferase, E1 ubiquitin-activating enzyme [Medicago truncatula]	up
MruG018736		--	Molecular Function: DNA binding (GO:0003677);; Molecular Function: protein dimerization activity (GO:0046983);;	--	--	Helix-loop-helix DNA-binding domain	Transcription factor bHLH25 OS=Arabidopsis thaliana OX=3702 GN=BHLH25 PE=2 SV=2	transcription factor bHLH18 [Medicago truncatula]	up
MruG040822		General function prediction only	Biological Process: defense response (GO:0006952);; Molecular Function: ADP binding (GO:0043531);;	[T]	Signal transduction mechanisms	NB-ARC domain	Putative disease resistance protein RGA1 OS=Solanum bulbocastanum OX=147425 GN=RGA1 PE=2 SV=2	putative disease resistance protein RGA1 [Medicago truncatula]	up
MruG039223		--	Cellular Component: integral component of membrane (GO:0016021);;	--	--	Fantastic Four meristem regulator	--	histone H3.v1 [Medicago truncatula]	up
MruG036130		Lipid transport and metabolism	Biological Process: lipid metabolic process (GO:0006629);; Cellular Component: integral component of membrane (GO:0016021);; Molecular Function: oxidoreductase activity, acting on paired donors, with oxidation of a pair of donors resulting in the reduction of molecular oxygen to two molecules of water (GO:0016717);;	--	--	Domain of unknown function (DUF3474)	Omega-3 fatty acid desaturase, chloroplastic OS=Glycine max OX=3847 GN=FAD7 PE=2 SV=1	omega-3 fatty acid desaturase, chloroplastic isoform X1 [Medicago truncatula]	up
MruG019751		Secondary metabolites biosynthesis, transport and catabolism;; Defense mechanisms	Molecular Function: monooxygenase activity (GO:0004497);; Molecular Function: iron ion binding (GO:0005506);; Cellular Component: integral component of membrane (GO:0016021);; Molecular Function: oxidoreductase activity, acting on paired donors, with incorporation or reduction of molecular oxygen (GO:0016705);; Molecular Function: heme binding (GO:0020037);;	[QI]	Secondary metabolites biosynthesis, transport and catabolism;; Lipid transport and metabolism	Cytochrome P450	Cytochrome P450 72A15 OS=Arabidopsis thaliana OX=3702 GN=CYP72A15 PE=2 SV=1	cytochrome P450 monooxygenase [Medicago truncatula]	up
MruG023677		--	Molecular Function: zinc ion binding (GO:0008270);;	--	--	GRF zinc finger	--	GRF zinc finger protein [Medicago truncatula]	up
MruG008650		--	Molecular Function: protein phosphatase inhibitor activity (GO:0004864);; Biological Process: defense response (GO:0006952);; Biological Process: response to biotic stimulus (GO:0009607);; Biological Process: abscisic acid-activated signaling pathway (GO:0009738);; Molecular Function: abscisic acid binding (GO:0010427);; Molecular Function: signaling receptor activity (GO:0038023);;	--	--	Pathogenesis-related protein Bet v 1 family	Disease resistance response protein Pi49 OS=Pisum sativum OX=3888 GN=DRR49A PE=2 SV=1	disease-resistance response protein [Medicago sativa]	up
MruG011748		--	Molecular Function: phosphatase activity (GO:0016791);; Molecular Function: metal ion binding (GO:0046872);;	[R]	General function prediction only	Putative Phosphatase	Inorganic pyrophosphatase 2 OS=Arabidopsis thaliana OX=3702 GN=At1g17710 PE=2 SV=1	inorganic pyrophosphatase 2 [Medicago truncatula]	up
MruG023468		Secondary metabolites biosynthesis, transport and catabolism	Molecular Function: methyltransferase activity (GO:0008168);; Biological Process: methylation (GO:0032259);; Molecular Function: metal ion binding (GO:0046872);; Molecular Function: thebaine 6-O-demethylase activity (GO:0102802);; Molecular Function: oripavine 6-O-demethylase activity (GO:0102804);;	[QR]	Secondary metabolites biosynthesis, transport and catabolism;; General function prediction only	non-haem dioxygenase in morphine synthesis N-terminal	Probable 2-oxoglutarate/Fe(II)-dependent dioxygenase OS=Papaver somniferum OX=3469 GN=DIOX2 PE=2 SV=1	putative thebaine 6-O-demethylase [Medicago truncatula]	up
MruG038814		Inorganic ion transport and metabolism	Biological Process: potassium ion transport (GO:0006813);; Molecular Function: potassium ion transmembrane transporter activity (GO:0015079);; Cellular Component: membrane (GO:0016020);; Cellular Component: integral component of membrane (GO:0016021);;	--	--	K+ potassium transporter	Potassium transporter 5 OS=Oryza sativa subsp. japonica OX=39947 GN=HAK5 PE=2 SV=2	potassium transporter 5 [Medicago truncatula]	up
MruG038182		Signal transduction mechanisms	Biological Process: phosphorelay signal transduction system (GO:0000160);;	[T]	Signal transduction mechanisms	Response regulator receiver domain	Two-component response regulator 24 OS=Arabidopsis thaliana OX=3702 GN=ARR24 PE=2 SV=1	two-component response regulator ARR22 [Medicago truncatula]	up
MruG021498		--	Cellular Component: nucleus (GO:0005634);; Biological Process: regulation of transcription, DNA-templated (GO:0006355);; Molecular Function: zinc ion binding (GO:0008270);;	--	--	--	--	protein FAR1-RELATED SEQUENCE 1-like [Medicago truncatula]	up
MruG037975		--	Cellular Component: nucleus (GO:0005634);; Biological Process: regulation of transcription, DNA-templated (GO:0006355);; Biological Process: auxin-activated signaling pathway (GO:0009734);;	--	--	AUX/IAA family	Auxin-induced protein AUX28 OS=Glycine max OX=3847 GN=AUX28 PE=2 SV=1	auxin-induced protein AUX28 [Medicago truncatula]	up
MruG042836		--	--	--	--	Remorin, C-terminal region	--	putative remorin [Medicago truncatula]	up
MruG038603		--	--	--	--	F-box-like	F-box protein At3g44326 OS=Arabidopsis thaliana OX=3702 GN=At3g44326 PE=2 SV=1	probable F-box protein At2g36090 [Medicago truncatula]	up
MruG038891		--	Biological Process: lipid metabolic process (GO:0006629);; Molecular Function: phosphatidylcholine 1-acylhydrolase activity (GO:0008970);;	--	--	Lipase (class 3)	Phospholipase A1 PLIP2, chloroplastic OS=Arabidopsis thaliana OX=3702 GN=PLIP2 PE=1 SV=1	triacylglycerol lipase [Medicago truncatula]	up
MruG024544		Cell cycle control, cell division, chromosome partitioning;; Cytoskeleton	--	[S]	Function unknown	Regulator of chromosome condensation (RCC1) repeat	Ultraviolet-B receptor UVR8 OS=Arabidopsis thaliana OX=3702 GN=UVR8 PE=1 SV=1	ultraviolet-B receptor UVR8 isoform X1 [Medicago truncatula]	up
MruG027888		Posttranslational modification, protein turnover, chaperones	Molecular Function: oxidoreductase activity (GO:0016491);; Biological Process: cell redox homeostasis (GO:0045454);;	[O]	Posttranslational modification, protein turnover, chaperones	Thioredoxin	Thioredoxin H2 OS=Arabidopsis thaliana OX=3702 GN=TRX2 PE=1 SV=2	thioredoxin H2 [Medicago truncatula]	up
MruG040220		--	Molecular Function: oxidoreductase activity, acting on single donors with incorporation of molecular oxygen, incorporation of two atoms of oxygen (GO:0016702);; Biological Process: oxylipin biosynthetic process (GO:0031408);; Biological Process: lipid oxidation (GO:0034440);; Molecular Function: metal ion binding (GO:0046872);;	--	--	Lipoxygenase	Seed linoleate 9S-lipoxygenase OS=Glycine max OX=3847 GN=LOX1.4 PE=1 SV=1	seed linoleate 9S-lipoxygenase [Medicago truncatula]	up
MruG037712		Lipid transport and metabolism	Molecular Function: 1-acylglycerol-3-phosphate O-acyltransferase activity (GO:0003841);; Cellular Component: endomembrane system (GO:0012505);; Cellular Component: integral component of membrane (GO:0016021);; Molecular Function: transferase activity, transferring acyl groups (GO:0016746);;	[I]	Lipid transport and metabolism	Acyltransferase C-terminus	1-acyl-sn-glycerol-3-phosphate acyltransferase 2 OS=Brassica napus OX=3708 GN=LPAT2 PE=2 SV=1	1-acyl-sn-glycerol-3-phosphate acyltransferase 2 [Medicago truncatula]	up
MruG038344		Signal transduction mechanisms	Molecular Function: ATP binding (GO:0005524);; Cellular Component: plasma membrane (GO:0005886);; Cellular Component: integral component of membrane (GO:0016021);; Molecular Function: ATPase activity (GO:0016887);; Molecular Function: ATPase activity, coupled to transmembrane movement of substances (GO:0042626);; Biological Process: transmembrane transport (GO:0055085);;	[Q]	Secondary metabolites biosynthesis, transport and catabolism	ABC-2 type transporter	Putative white-brown complex homolog protein 30 OS=Arabidopsis thaliana OX=3702 GN=WBC30 PE=1 SV=3	white-brown-complex ABC transporter family protein, putative [Medicago truncatula]	up
MruG002439		--	Cellular Component: integral component of membrane (GO:0016021);;	[E]	Amino acid transport and metabolism	Transmembrane amino acid transporter protein	Amino acid transporter AVT1C OS=Arabidopsis thaliana OX=3702 GN=AVT1C PE=1 SV=1	amino acid transporter AVT1C [Medicago truncatula]	up
MruG001425			Molecular Function: protein kinase activity (GO:0004672);; Molecular Function: ATP binding (GO:0005524);; Molecular Function: glycerophosphodiester phosphodiesterase activity (GO:0008889);; Cellular Component: integral component of membrane (GO:0016021);; Molecular Function: polysaccharide binding (GO:0030247);;	[T]	Signal transduction mechanisms	Protein kinase domain	Rust resistance kinase Lr10 OS=Triticum aestivum OX=4565 GN=LRK10 PE=2 SV=1	rust resistance kinase Lr10 [Medicago truncatula]	up
MruG044856		--	--	--	--	--	--	hypothetical protein MtrunA17_Chr3g0078711 [Medicago truncatula]	up
MruG012631		General function prediction only	Molecular Function: hydrolase activity (GO:0016787);; Molecular Function: ADP binding (GO:0043531);;	[T]	Signal transduction mechanisms	NB-ARC domain	Putative disease resistance RPP13-like protein 1 OS=Arabidopsis thaliana OX=3702 GN=RPPL1 PE=3 SV=1	putative P-loop containing nucleoside triphosphate hydrolase, leucine-rich repeat domain, L [Medicago truncatula]	up
MruG046088		--	Molecular Function: ADP binding (GO:0043531);;	[T]	Signal transduction mechanisms	NB-ARC domain	Putative disease resistance protein RGA1 OS=Solanum bulbocastanum OX=147425 GN=RGA1 PE=2 SV=2	disease resistance protein RGA2 isoform X1 [Medicago truncatula]	up
MruG035034		--	Molecular Function: molecular_function (GO:0003674);; Molecular Function: enzyme inhibitor activity (GO:0004857);; Molecular Function: protein binding (GO:0005515);; Cellular Component: cellular_component (GO:0005575);; Cellular Component: cell wall (GO:0005618);; Cellular Component: intracellular (GO:0005622);; Cellular Component: cell (GO:0005623);; Cellular Component: cytoplasm (GO:0005737);; …	--	--	Leucine rich repeat	Polygalacturonase inhibitor 1 OS=Arabidopsis thaliana OX=3702 GN=PGIP1 PE=1 SV=1	polygalacturonase inhibiting protein, putative [Medicago truncatula]	up
MruG005652		--	Molecular Function: four-way junction DNA binding (GO:0000400);; Molecular Function: ATP binding (GO:0005524);; Molecular Function: four-way junction helicase activity (GO:0009378);; Biological Process: interstrand cross-link repair (GO:0036297);; Molecular Function: 3'-5' DNA helicase activity (GO:0043138);; Biological Process: double-strand break repair via synthesis-dependent strand annealing …	[R]	General function prediction only	--	DEAD-box ATP-dependent RNA helicase FANCM OS=Arabidopsis thaliana OX=3702 GN=FANCM PE=2 SV=1	fanconi anemia, complementation group M protein [Medicago truncatula]	up
MruG011677		--	Molecular Function: oxidoreductase activity, acting on single donors with incorporation of molecular oxygen, incorporation of two atoms of oxygen (GO:0016702);; Biological Process: oxylipin biosynthetic process (GO:0031408);; Biological Process: lipid oxidation (GO:0034440);; Molecular Function: metal ion binding (GO:0046872);;	--	--	Lipoxygenase	Seed linoleate 9S-lipoxygenase-2 OS=Pisum sativum OX=3888 GN=LOX1.2 PE=2 SV=1	seed linoleate 9S-lipoxygenase-2 [Medicago truncatula]	up
MruG025321		General function prediction only	Cellular Component: nucleus (GO:0005634);; Cellular Component: cytosol (GO:0005829);; Biological Process: circadian rhythm (GO:0007623);; Biological Process: response to blue light (GO:0009637);; Cellular Component: SCF ubiquitin ligase complex (GO:0019005);;	--	--	Galactose oxidase, central domain	Adagio protein 3 OS=Arabidopsis thaliana OX=3702 GN=ADO3 PE=1 SV=1	adagio protein 3 [Medicago truncatula]	up
MruG046528		--	--	--	--	--	--	unknown [Medicago truncatula]	up
MruG011948		--	Biological Process: intracellular protein transport (GO:0006886);; Biological Process: ER to Golgi vesicle-mediated transport (GO:0006888);; Molecular Function: zinc ion binding (GO:0008270);; Cellular Component: COPII vesicle coat (GO:0030127);;	[U]	Intracellular trafficking, secretion, and vesicular transport	--	Protein transport protein Sec24-like At4g32640 OS=Arabidopsis thaliana OX=3702 GN=At4g32640 PE=3 SV=3	Protein transport protein Sec24-like isoform E [Glycine soja]	up
MruG003903		--	Cellular Component: nucleus (GO:0005634);; Biological Process: regulation of transcription, DNA-templated (GO:0006355);; Biological Process: auxin-activated signaling pathway (GO:0009734);;	--	--	AUX/IAA family	Auxin-induced protein 22B OS=Vigna radiata var. radiata OX=3916 GN=AUX22B PE=2 SV=1	auxin-induced protein 22B [Medicago truncatula]	up
MruG004010		--	Cellular Component: nuclear pore (GO:0005643);; Molecular Function: structural constituent of nuclear pore (GO:0017056);;	[YU]	Nuclear structure;; Intracellular trafficking, secretion, and vesicular transport	--	Nuclear pore complex protein NUP98A OS=Arabidopsis thaliana OX=3702 GN=NUP98A PE=1 SV=1	nuclear pore complex protein NUP98A isoform X3 [Medicago truncatula]	up
MruG003935		--	Biological Process: microtubule cytoskeleton organization (GO:0000226);; Biological Process: cytokinesis by cell plate formation (GO:0000911);; Cellular Component: cytoplasm (GO:0005737);; Cellular Component: spindle (GO:0005819);; Molecular Function: microtubule binding (GO:0008017);;	[DZ]	Cell cycle control, cell division, chromosome partitioning;; Cytoskeleton	Microtubule associated protein (MAP65/ASE1 family)	65-kDa microtubule-associated protein 3 OS=Arabidopsis thaliana OX=3702 GN=MAP65-3 PE=1 SV=1	65-kDa microtubule-associated protein 3 [Medicago truncatula]	up
MruG040389		--	Biological Process: response to auxin (GO:0009733);;	--	--	Auxin responsive protein	Auxin-responsive protein SAUR78 OS=Arabidopsis thaliana OX=3702 GN=SAUR78 PE=1 SV=1	auxin-responsive protein SAUR50 [Medicago truncatula]	up
MruG038417		--	Molecular Function: UDP-glycosyltransferase activity (GO:0008194);; Cellular Component: intracellular membrane-bounded organelle (GO:0043231);;	[GC]	Carbohydrate transport and metabolism;; Energy production and conversion	UDP-glucoronosyl and UDP-glucosyl transferase	UDP-glycosyltransferase 73C2 OS=Arabidopsis thaliana OX=3702 GN=UGT73C2 PE=3 SV=1	UDP-glycosyltransferase 73C1 [Medicago truncatula]	up
MruG030070		--	Molecular Function: soluble NSF attachment protein activity (GO:0005483);; Cellular Component: vacuolar membrane (GO:0005774);; Biological Process: intracellular protein transport (GO:0006886);; Molecular Function: syntaxin binding (GO:0019905);; Cellular Component: SNARE complex (GO:0031201);; Biological Process: SNARE complex disassembly (GO:0035494);;	[U]	Intracellular trafficking, secretion, and vesicular transport	Soluble NSF attachment protein, SNAP	Alpha-soluble NSF attachment protein OS=Vitis vinifera OX=29760 PE=2 SV=1	alpha-soluble NSF attachment protein 2 isoform X1 [Medicago truncatula]	up
MruG038775		--	--	--	--	--	--	uncharacterized protein LOC25499582 [Medicago truncatula]	up
MruG013556		Secondary metabolites biosynthesis, transport and catabolism;; Defense mechanisms	Molecular Function: iron ion binding (GO:0005506);; Cellular Component: membrane (GO:0016020);; Cellular Component: integral component of membrane (GO:0016021);; Molecular Function: oxidoreductase activity, acting on paired donors, with incorporation or reduction of molecular oxygen, NAD(P)H as one donor, and incorporation of one atom of oxygen (GO:0016709);; Molecular Function: heme binding (GO:…	[Q]	Secondary metabolites biosynthesis, transport and catabolism	Cytochrome P450	Cytochrome P450 71D9 OS=Glycine max OX=3847 GN=CYP71D9 PE=2 SV=1	cytochrome P450 71D9 [Medicago truncatula]	up
MruG001890		--	Biological Process: cell morphogenesis (GO:0000902);; Cellular Component: plasma membrane (GO:0005886);;	[R]	General function prediction only	Cell morphogenesis central region	AP2-like ethylene-responsive transcription factor PLT2 OS=Arabidopsis thaliana OX=3702 GN=PLT2 PE=2 SV=1	protein furry-like, partial [Trifolium pratense]	up
MruG008658		--	Molecular Function: protein phosphatase inhibitor activity (GO:0004864);; Cellular Component: nucleus (GO:0005634);; Cellular Component: cytoplasm (GO:0005737);; Biological Process: defense response (GO:0006952);; Biological Process: response to biotic stimulus (GO:0009607);; Biological Process: abscisic acid-activated signaling pathway (GO:0009738);; Molecular Function: abscisic acid binding (GO…	--	--	Pathogenesis-related protein Bet v 1 family	ABA-responsive protein ABR17 OS=Pisum sativum OX=3888 PE=2 SV=1	ABA-responsive protein ABR17 isoform X2 [Medicago truncatula]	up
MruG043561		--	Cellular Component: nucleus (GO:0005634);; Cellular Component: cytoplasm (GO:0005737);; Biological Process: protein transport (GO:0015031);; Molecular Function: ribosomal large subunit binding (GO:0043023);;	[J]	Translation, ribosomal structure and biogenesis	NMD3 family	--	hypothetical protein MtrunA17_Chr4g0059211 [Medicago truncatula]	up
MruG038224		--	Cellular Component: plasma membrane (GO:0005886);; Cellular Component: integral component of membrane (GO:0016021);; Molecular Function: transmembrane transporter activity (GO:0022857);;	--	--	EamA-like transporter family	WAT1-related protein At2g37460 OS=Arabidopsis thaliana OX=3702 GN=At2g37460 PE=2 SV=1	WAT1-related protein At2g37460 [Medicago truncatula]	up
MruG020238		--	Molecular Function: nucleoside transmembrane transporter activity (GO:0005337);; Cellular Component: plasma membrane (GO:0005886);; Cellular Component: integral component of membrane (GO:0016021);;	[F]	Nucleotide transport and metabolism	Nucleoside transporter	Equilibrative nucleotide transporter 3 OS=Arabidopsis thaliana OX=3702 GN=ENT3 PE=1 SV=1	equilibrative nucleotide transporter 3 isoform X3 [Medicago truncatula]	up
MruG020802		--	Cellular Component: plasma membrane (GO:0005886);; Cellular Component: plasmodesma (GO:0009506);; Cellular Component: integral component of membrane (GO:0016021);;	--	--	Tetraspanin family	Tetraspanin-3 OS=Arabidopsis thaliana OX=3702 GN=TET3 PE=1 SV=1	tetraspanin-3 [Medicago truncatula]	up
MruG027533			Molecular Function: protein kinase activity (GO:0004672);; Molecular Function: ubiquitin-protein transferase activity (GO:0004842);; Molecular Function: ATP binding (GO:0005524);;	--	--	Protein tyrosine and serine/threonine kinase	Putative U-box domain-containing protein 50 OS=Arabidopsis thaliana OX=3702 GN=PUB50 PE=3 SV=1	putative U-box domain-containing protein 50 isoform X1 [Medicago truncatula]	up
MruG006826		--	Molecular Function: UDP-glycosyltransferase activity (GO:0008194);; Cellular Component: intracellular membrane-bounded organelle (GO:0043231);;	[GC]	Carbohydrate transport and metabolism;; Energy production and conversion	UDP-glucoronosyl and UDP-glucosyl transferase	Soyasaponin III rhamnosyltransferase OS=Glycine max OX=3847 GN=GmSGT3 PE=1 SV=1	soyasaponin III rhamnosyltransferase [Medicago truncatula]	up
MruG034299		--	Cellular Component: integral component of membrane (GO:0016021);; Molecular Function: transmembrane transporter activity (GO:0022857);;	[S]	Function unknown	Solute carrier family 35	--	solute carrier family 35 member F1 [Medicago truncatula]	up
MruG027053			Molecular Function: protein serine/threonine kinase activity (GO:0004674);; Molecular Function: ATP binding (GO:0005524);; Cellular Component: plasma membrane (GO:0005886);; Cellular Component: integral component of membrane (GO:0016021);; Molecular Function: carbohydrate binding (GO:0030246);;	--	--	Legume lectin domain	Probable L-type lectin-domain containing receptor kinase S.5 OS=Arabidopsis thaliana OX=3702 GN=LECRKS5 PE=2 SV=1	probable L-type lectin-domain containing receptor kinase S.5 [Medicago truncatula]	up
MruG029096		--	Molecular Function: RNA polymerase I CORE element sequence-specific DNA binding (GO:0001164);; Cellular Component: RNA polymerase transcription factor SL1 complex (GO:0005668);; Biological Process: transcription of nuclear large rRNA transcript from RNA polymerase I promoter (GO:0042790);; Cellular Component: RNA polymerase I core factor complex (GO:0070860);;	--	--	--	TATA box-binding protein-associated factor RNA polymerase I subunit B OS=Arabidopsis thaliana OX=3702 GN=MEE12 PE=1 SV=1	TATA box-binding protein associated factor RNA polymerase I subunit B-like protein [Medicago truncatula]	up
MruG005627		--	Molecular Function: RNA polymerase II core promoter proximal region sequence-specific DNA binding (GO:0000978);; Molecular Function: transcription factor activity, sequence-specific DNA binding (GO:0003700);; Cellular Component: nucleus (GO:0005634);; Biological Process: cellular response to heat (GO:0034605);; Cellular Component: host cell nucleus (GO:0042025);; Molecular Function: sequence-spec…	[K]	Transcription	HSF-type DNA-binding	Heat stress transcription factor A-6b OS=Arabidopsis thaliana OX=3702 GN=HSFA6b PE=2 SV=1	heat stress transcription factor A-6b [Medicago truncatula]	up
MruG000553		--	Molecular Function: RNA polymerase II core promoter proximal region sequence-specific DNA binding (GO:0000978);; Molecular Function: RNA polymerase II transcription factor activity, sequence-specific DNA binding (GO:0000981);; Cellular Component: nucleus (GO:0005634);; Biological Process: regulation of transcription from RNA polymerase II promoter (GO:0006357);;	[K]	Transcription	Associated with HOX	Homeobox protein ATH1 OS=Arabidopsis thaliana OX=3702 GN=ATH1 PE=1 SV=1	homeobox protein ATH1 [Medicago truncatula]	up
MruG050005		--	Molecular Function: cysteine-type peptidase activity (GO:0008234);;	--	--	--	--	Ulp1 protease family, carboxy-terminal domain protein [Medicago truncatula]	up
MruG010962		--	Molecular Function: magnesium ion binding (GO:0000287);; Molecular Function: terpene synthase activity (GO:0010333);;	--	--	Terpene synthase, N-terminal domain	Probable terpene synthase 11 OS=Ricinus communis OX=3988 GN=TPS11 PE=3 SV=1	probable terpene synthase 11 [Medicago truncatula]	up
MruG031989		--	Molecular Function: protein serine/threonine kinase activity (GO:0004674);;	[R]	General function prediction only	Leucine rich repeat	--	putative non-specific serine/threonine protein kinase [Medicago truncatula]	up
MruG027246		--	--	--	--	Domain of unknown function (DUF1995)	--	protein LOW PSII ACCUMULATION 3, chloroplastic isoform X1 [Medicago truncatula]	up
MruG040849		--	Cellular Component: integral component of membrane (GO:0016021);; Molecular Function: transferase activity, transferring glycosyl groups (GO:0016757);;	[R]	General function prediction only	Glycosyl transferase family 90	--	protein O-glucosyltransferase 1 isoform X1 [Medicago truncatula]	up
MruG030314		Cell wall/membrane/envelope biogenesis	Molecular Function: magnesium ion binding (GO:0000287);; Biological Process: regulation of chromatin assembly or disassembly (GO:0001672);; Molecular Function: protein serine/threonine kinase activity (GO:0004674);; Molecular Function: ATP binding (GO:0005524);; Cellular Component: nucleus (GO:0005634);; Biological Process: chromosome segregation (GO:0007059);; Biological Process: peptidyl-serine…	[T]	Signal transduction mechanisms	Protein kinase domain	Serine/threonine-protein kinase TOUSLED OS=Arabidopsis thaliana OX=3702 GN=TOUSLED PE=1 SV=1	serine/threonine-protein kinase TOUSLED [Medicago truncatula]	up
MruG014464		Posttranslational modification, protein turnover, chaperones	Molecular Function: glutathione transferase activity (GO:0004364);; Cellular Component: cytoplasm (GO:0005737);; Biological Process: glutathione metabolic process (GO:0006749);;	[O]	Posttranslational modification, protein turnover, chaperones	Glutathione S-transferase, C-terminal domain	Probable glutathione S-transferase parA OS=Nicotiana tabacum OX=4097 GN=PARA PE=2 SV=1	probable glutathione S-transferase parA [Medicago truncatula]	up
MruG037014		--	Molecular Function: DNA binding (GO:0003677);; Cellular Component: nucleus (GO:0005634);; Biological Process: regulation of transcription, DNA-templated (GO:0006355);;	--	--	No apical meristem (NAM) protein	NAC domain-containing protein 53 OS=Arabidopsis thaliana OX=3702 GN=NAC053 PE=2 SV=1	NAC domain-containing protein 83 [Medicago truncatula]	up
MruG016358		--	Cellular Component: integral component of membrane (GO:0016021);;	--	--	--	--	uncharacterized protein LOC25489751 [Medicago truncatula]	up
MruG047056		Signal transduction mechanisms	Molecular Function: protein serine/threonine phosphatase activity (GO:0004722);; Molecular Function: magnesium-dependent protein serine/threonine phosphatase activity (GO:0004724);; Cellular Component: nucleus (GO:0005634);; Cellular Component: cytosol (GO:0005829);; Molecular Function: metal ion binding (GO:0046872);;	[T]	Signal transduction mechanisms	Protein phosphatase 2C	Protein phosphatase 2C 37 OS=Arabidopsis thaliana OX=3702 GN=PP2CA PE=1 SV=1	probable protein phosphatase 2C 24 [Medicago truncatula]	up
MruG038281		Replication, recombination and repair	Biological Process: double-strand break repair via homologous recombination (GO:0000724);; Molecular Function: DNA helicase activity (GO:0003678);; Molecular Function: DNA replication origin binding (GO:0003688);; Molecular Function: single-stranded DNA binding (GO:0003697);; Molecular Function: ATP binding (GO:0005524);; Cellular Component: nucleus (GO:0005634);; Biological Process: DNA replicat…	[L]	Replication, recombination and repair	MCM P-loop domain	Probable DNA helicase MCM8 OS=Arabidopsis thaliana OX=3702 GN=MCM8 PE=2 SV=2	probable DNA helicase MCM8 [Medicago truncatula]	up
MruG005388			Molecular Function: protein serine/threonine kinase activity (GO:0004674);; Molecular Function: ATP binding (GO:0005524);; Cellular Component: integral component of membrane (GO:0016021);; Molecular Function: carbohydrate binding (GO:0030246);; Biological Process: recognition of pollen (GO:0048544);;	--	--	Protein kinase domain	G-type lectin S-receptor-like serine/threonine-protein kinase At5g24080 OS=Arabidopsis thaliana OX=3702 GN=At5g24080 PE=2 SV=1	G-type lectin S-receptor-like serine/threonine-protein kinase At5g24080 isoform X1 [Medicago truncatula]	up
MruG025726		--	Cellular Component: integral component of membrane (GO:0016021);;	--	--	--	--	uncharacterized protein LOC101496924 isoform 1 [Cicer arietinum]	up
MruG022781		--	Molecular Function: ubiquitin activating enzyme activity (GO:0004839);; Molecular Function: transferase activity, transferring acyl groups (GO:0016746);; Molecular Function: ubiquitin conjugating enzyme activity (GO:0061631);;	[O]	Posttranslational modification, protein turnover, chaperones	--	Probable ubiquitin-conjugating enzyme E2 24 OS=Arabidopsis thaliana OX=3702 GN=UBC24 PE=1 SV=1	probable ubiquitin-conjugating enzyme E2 24 [Medicago truncatula]	up
MruG050207		--	Molecular Function: DNA binding (GO:0003677);;	--	--	Glycine-rich domain-containing protein-like	Glycine-rich domain-containing protein 1 OS=Arabidopsis thaliana OX=3702 GN=GRDP1 PE=2 SV=1	glycine-rich domain-containing protein 1 [Medicago truncatula]	up
MruG048486		--	Molecular Function: isoflavone-7-O-beta-glucoside 6''-O-malonyltransferase activity (GO:0047164);;	--	--	Transferase family	Phenolic glucoside malonyltransferase 1 OS=Arabidopsis thaliana OX=3702 GN=PMAT1 PE=1 SV=1	phenolic glucoside malonyltransferase 1 [Medicago truncatula]	up
MruG018997		--	Molecular Function: iron ion transmembrane transporter activity (GO:0005381);; Biological Process: iron ion transport (GO:0006826);; Cellular Component: integral component of membrane (GO:0016021);;	[P]	Inorganic ion transport and metabolism	Ferroportin1 (FPN1)	Solute carrier family 40 member 2 OS=Arabidopsis thaliana OX=3702 GN=IREG2 PE=2 SV=1	solute carrier family 40 member 2 [Medicago truncatula]	up
MruG032884		--	Cellular Component: integral component of membrane (GO:0016021);;	--	--	Photosynthesis affected mutant 68	Uncharacterized protein PAM68-like OS=Arabidopsis thaliana OX=3702 GN=At5g52780 PE=2 SV=1	uncharacterized protein PAM68-like [Medicago truncatula]	up
MruG015009		--	Molecular Function: ADP binding (GO:0043531);;	--	--	--	--	hypothetical protein MtrunA17_Chr3g0114381 [Medicago truncatula]	up
MruG011558		Lipid transport and metabolism	Molecular Function: 1-acylglycerol-3-phosphate O-acyltransferase activity (GO:0003841);; Cellular Component: integral component of membrane (GO:0016021);;	[I]	Lipid transport and metabolism	Acyltransferase C-terminus	1-acyl-sn-glycerol-3-phosphate acyltransferase 3 OS=Arabidopsis thaliana OX=3702 GN=LPAT3 PE=2 SV=1	LOW QUALITY PROTEIN: 1-acyl-sn-glycerol-3-phosphate acyltransferase 3 [Medicago truncatula]	up
MruG009743		--	Cellular Component: integral component of membrane (GO:0016021);;	--	--	Leucine rich repeat	Receptor-like protein EIX2 OS=Solanum lycopersicum OX=4081 GN=EIX2 PE=1 SV=2	receptor-like protein EIX1 [Medicago truncatula]	up
MruG004155		--	Molecular Function: nucleic acid binding (GO:0003676);; Cellular Component: nucleus (GO:0005634);; Molecular Function: zinc ion binding (GO:0008270);;	--	--	Lateral organ boundaries (LOB) domain	LOB domain-containing protein 11 OS=Arabidopsis thaliana OX=3702 GN=LBD11 PE=2 SV=2	hypothetical protein AQUCO_01900185v1 [Aquilegia coerulea]	up
MruG049818		--	Molecular Function: ubiquitin activating enzyme activity (GO:0004839);; Molecular Function: transferase activity, transferring acyl groups (GO:0016746);; Molecular Function: ubiquitin conjugating enzyme activity (GO:0061631);;	[O]	Posttranslational modification, protein turnover, chaperones	--	Probable ubiquitin-conjugating enzyme E2 24 OS=Arabidopsis thaliana OX=3702 GN=UBC24 PE=1 SV=1	probable ubiquitin-conjugating enzyme E2 24 [Medicago truncatula]	up
MruG032768		--	Molecular Function: UDP-glycosyltransferase activity (GO:0008194);; Molecular Function: soyasaponin III rhamnosyltransferase activity (GO:0102241);;	[GC]	Carbohydrate transport and metabolism;; Energy production and conversion	UDP-glucoronosyl and UDP-glucosyl transferase	Soyasaponin III rhamnosyltransferase OS=Glycine max OX=3847 GN=GmSGT3 PE=1 SV=1	soyasaponin III rhamnosyltransferase-like [Medicago truncatula]	up
MruG030352		Energy production and conversion	Cellular Component: chloroplast thylakoid membrane (GO:0009535);; Biological Process: photosynthesis (GO:0015979);; Biological Process: chlorophyll biosynthetic process (GO:0015995);; Molecular Function: oxidoreductase activity, acting on the CH-CH group of donors (GO:0016627);; Molecular Function: geranylgeranyl reductase activity (GO:0045550);; Biological Process: oxidation-reduction process (G…	--	--	--	Geranylgeranyl diphosphate reductase, chloroplastic OS=Nicotiana tabacum OX=4097 GN=CHLP PE=2 SV=1	geranylgeranyl diphosphate reductase, chloroplastic [Medicago truncatula]	up
MruG011725		--	--	--	--	--	--	hypothetical protein MtrDRAFT_AC155896g37v2 [Medicago truncatula]	up
MruG038376		--	Molecular Function: structural constituent of ribosome (GO:0003735);; Biological Process: translation (GO:0006412);; Cellular Component: cytosolic large ribosomal subunit (GO:0022625);;	[J]	Translation, ribosomal structure and biogenesis	Ribosomal L27e protein family	60S ribosomal protein L27 OS=Pisum sativum OX=3888 GN=RPL27 PE=2 SV=1	60S ribosomal protein L27 [Medicago truncatula]	up
MruG014335		--	Molecular Function: N-acyltransferase activity (GO:0016410);;	--	--	Transferase family	Spermidine coumaroyl-CoA acyltransferase OS=Arabidopsis thaliana OX=3702 GN=SCT PE=1 SV=1	spermidine coumaroyl-CoA acyltransferase [Medicago truncatula]	up
MruG010961		--	Molecular Function: magnesium ion binding (GO:0000287);; Molecular Function: terpene synthase activity (GO:0010333);;	--	--	Terpene synthase family, metal binding domain	Probable terpene synthase 11 OS=Ricinus communis OX=3988 GN=TPS11 PE=3 SV=1	probable terpene synthase 11 [Medicago truncatula]	up
MruG004718		Posttranslational modification, protein turnover, chaperones	Molecular Function: glutathione transferase activity (GO:0004364);; Cellular Component: cytoplasm (GO:0005737);; Biological Process: glutathione metabolic process (GO:0006749);; Molecular Function: glutathione binding (GO:0043295);;	[O]	Posttranslational modification, protein turnover, chaperones	Glutathione S-transferase, N-terminal domain	Glutathione S-transferase OS=Hyoscyamus muticus OX=35626 PE=1 SV=1	glutathione S-transferase [Medicago truncatula]	up
MruG007525		Lipid transport and metabolism;; General function prediction only	Molecular Function: triglyceride lipase activity (GO:0004806);;	--	--	GDSL-like Lipase/Acylhydrolase	GDSL esterase/lipase At1g29670 OS=Arabidopsis thaliana OX=3702 GN=At1g29670 PE=2 SV=1	GDSL esterase/lipase At1g29670 [Medicago truncatula]	up
MruG042263		--	Molecular Function: DNA binding (GO:0003677);; Molecular Function: protein dimerization activity (GO:0046983);;	--	--	Helix-loop-helix DNA-binding domain	Transcription factor bHLH18 OS=Arabidopsis thaliana OX=3702 GN=BHLH18 PE=1 SV=1	helix loop helix DNA-binding domain protein [Medicago truncatula]	up
MruG036459		Nucleotide transport and metabolism	Cellular Component: plasma membrane (GO:0005886);; Cellular Component: integral component of membrane (GO:0016021);; Molecular Function: transmembrane transporter activity (GO:0022857);;	--	--	EamA-like transporter family	WAT1-related protein At4g28040 OS=Arabidopsis thaliana OX=3702 GN=At4g28040 PE=2 SV=1	WAT1-related protein At4g28040 [Medicago truncatula]	up
MruG039227		--	Biological Process: phosphorelay signal transduction system (GO:0000160);; Cellular Component: nucleus (GO:0005634);; Cellular Component: cytoplasm (GO:0005737);; Biological Process: cytokinin-activated signaling pathway (GO:0009736);; Molecular Function: histidine phosphotransfer kinase activity (GO:0009927);; Biological Process: phosphorylation (GO:0016310);; Molecular Function: protein histidi…	[T]	Signal transduction mechanisms	Hpt domain	Histidine-containing phosphotransfer protein 1 OS=Arabidopsis thaliana OX=3702 GN=AHP1 PE=1 SV=1	histidine-containing phosphotransfer protein 1 [Medicago truncatula]	up
MruG047895		--	Molecular Function: RNA polymerase II core promoter proximal region sequence-specific DNA binding (GO:0000978);; Molecular Function: transcription factor activity, sequence-specific DNA binding (GO:0003700);; Cellular Component: nucleus (GO:0005634);; Biological Process: cellular response to heat (GO:0034605);; Cellular Component: host cell nucleus (GO:0042025);; Molecular Function: sequence-spec…	[K]	Transcription	HSF-type DNA-binding	Heat stress transcription factor C-1 OS=Arabidopsis thaliana OX=3702 GN=HSFC1 PE=1 SV=1	heat stress transcription factor C-1 [Medicago truncatula]	up
MruG004012		--	Cellular Component: nuclear pore (GO:0005643);; Molecular Function: structural constituent of nuclear pore (GO:0017056);;	[YU]	Nuclear structure;; Intracellular trafficking, secretion, and vesicular transport	--	Nuclear pore complex protein NUP98A OS=Arabidopsis thaliana OX=3702 GN=NUP98A PE=1 SV=1	nuclear pore complex protein NUP98A isoform X3 [Medicago truncatula]	up
MruG000907		--	Molecular Function: cysteine-type peptidase activity (GO:0008234);;	--	--	--	--	Ulp1 protease family, carboxy-terminal domain protein [Medicago truncatula]	up
MruG038044		--	Molecular Function: nutrient reservoir activity (GO:0045735);;	--	--	Cupin	Legumin type B OS=Vicia faba OX=3906 GN=LEB4 PE=3 SV=1	legumin J [Medicago truncatula]	up
MruG030722		--	Biological Process: signal transduction (GO:0007165);; Molecular Function: ADP binding (GO:0043531);;	--	--	TIR domain	TMV resistance protein N OS=Nicotiana glutinosa OX=35889 GN=N PE=1 SV=1	uncharacterized protein LOC11433021 [Medicago truncatula]	up
MruG013330		--	--	--	--	--	--	hypothetical protein MtrunA17_Chr8g0387861 [Medicago truncatula]	up
MruG037542		Lipid transport and metabolism	Molecular Function: iron ion binding (GO:0005506);; Biological Process: lipid biosynthetic process (GO:0008610);; Cellular Component: membrane (GO:0016020);; Cellular Component: integral component of membrane (GO:0016021);; Molecular Function: oxidoreductase activity (GO:0016491);;	--	--	WAX2 C-terminal domain	Very-long-chain aldehyde decarbonylase CER1 OS=Arabidopsis thaliana OX=3702 GN=CER1 PE=1 SV=1	fatty acid hydroxylase superfamily protein [Medicago truncatula]	up
MruG025545		Replication, recombination and repair	Molecular Function: damaged DNA binding (GO:0003684);; Molecular Function: DNA-directed DNA polymerase activity (GO:0003887);; Biological Process: DNA repair (GO:0006281);;	[L]	Replication, recombination and repair	impB/mucB/samB family	DNA polymerase kappa OS=Arabidopsis thaliana OX=3702 GN=POLK PE=1 SV=1	DNA polymerase kappa isoform X2 [Medicago truncatula]	up
MruG034303		Carbohydrate transport and metabolism	Molecular Function: 2,3-dimethylmalate lyase activity (GO:0047529);;	[C]	Energy production and conversion	Phosphoenolpyruvate phosphomutase	--	Isocitrate lyase and phosphorylmutase [Medicago truncatula]	up
MruG037826		--	Cellular Component: apoplast (GO:0048046);;	--	--	Dirigent-like protein	Pterocarpan synthase 1 OS=Glycyrrhiza echinata OX=46348 GN=PTS1 PE=1 SV=1	dirigent protein 1 [Medicago truncatula]	up
MruG033727		--	Molecular Function: ubiquitin protein ligase activity (GO:0061630);;	[O]	Posttranslational modification, protein turnover, chaperones	Ring finger domain	E3 ubiquitin-protein ligase MBR2 OS=Arabidopsis thaliana OX=3702 GN=MBR2 PE=1 SV=1	uncharacterized protein LOC11426047 [Medicago truncatula]	up
MruG041374		Secondary metabolites biosynthesis, transport and catabolism;; Defense mechanisms	Molecular Function: monooxygenase activity (GO:0004497);; Molecular Function: iron ion binding (GO:0005506);; Cellular Component: integral component of membrane (GO:0016021);; Molecular Function: oxidoreductase activity, acting on paired donors, with incorporation or reduction of molecular oxygen (GO:0016705);; Molecular Function: heme binding (GO:0020037);;	[QI]	Secondary metabolites biosynthesis, transport and catabolism;; Lipid transport and metabolism	Cytochrome P450	11-oxo-beta-amyrin 30-oxidase OS=Medicago truncatula OX=3880 GN=CYP72A63 PE=1 SV=1	cytochrome P450 family 72 protein [Medicago truncatula]	up
MruG021527		--	Biological Process: response to auxin (GO:0009733);;	--	--	Auxin responsive protein	Indole-3-acetic acid-induced protein ARG7 OS=Vigna radiata var. radiata OX=3916 GN=ARG7 PE=2 SV=1	hypothetical protein TSUD_63020 [Trifolium subterraneum]	up
MruG005025		Signal transduction mechanisms	Molecular Function: ATP binding (GO:0005524);; Cellular Component: integral component of membrane (GO:0016021);; Molecular Function: ATPase activity (GO:0016887);;	[Q]	Secondary metabolites biosynthesis, transport and catabolism	ABC-2 type transporter	ABC transporter G family member 21 OS=Arabidopsis thaliana OX=3702 GN=ABCG21 PE=2 SV=2	putative pleiotropic drug resistance protein PDR/CDR [Medicago truncatula]	up
MruG009747		--	--	--	--	Nodule-specific GRP repeat	--	EnodGRP5 protein [Medicago sativa subsp. x varia]	up
MruG013572		Defense mechanisms	Molecular Function: ATP binding (GO:0005524);; Cellular Component: integral component of membrane (GO:0016021);; Molecular Function: ATPase activity (GO:0016887);; Molecular Function: ATPase activity, coupled to transmembrane movement of substances (GO:0042626);;	[Q]	Secondary metabolites biosynthesis, transport and catabolism	ABC transporter	ABC transporter C family member 3 OS=Arabidopsis thaliana OX=3702 GN=ABCC3 PE=1 SV=1	putative xenobiotic-transporting ATPase [Medicago truncatula]	up
MruG041393		Carbohydrate transport and metabolism	Cellular Component: plasma membrane (GO:0005886);; Cellular Component: plant-type vacuole membrane (GO:0009705);; Cellular Component: integral component of membrane (GO:0016021);; Molecular Function: potassium ion antiporter activity (GO:0022821);; Biological Process: regulation of stomatal closure (GO:0090333);;	[R]	General function prediction only	Major Facilitator Superfamily	Protein ZINC INDUCED FACILITATOR-LIKE 1 OS=Arabidopsis thaliana OX=3702 GN=ZIFL1 PE=2 SV=1	protein ZINC INDUCED FACILITATOR-LIKE 1 [Medicago truncatula]	up
MruG021504		--	Biological Process: response to auxin (GO:0009733);;	--	--	Auxin responsive protein	Auxin-induced protein 6B OS=Glycine max OX=3847 PE=2 SV=1	putative small auxin-up RNA [Medicago truncatula]	up
MruG018890		Signal transduction mechanisms	Molecular Function: ATP binding (GO:0005524);; Cellular Component: plasma membrane (GO:0005886);; Cellular Component: integral component of membrane (GO:0016021);; Molecular Function: ATPase activity (GO:0016887);; Molecular Function: ATPase activity, coupled to transmembrane movement of substances (GO:0042626);; Biological Process: transmembrane transport (GO:0055085);;	[Q]	Secondary metabolites biosynthesis, transport and catabolism	ABC-2 type transporter	Pleiotropic drug resistance protein 1 OS=Nicotiana tabacum OX=4097 GN=PDR1 PE=2 SV=1	pleiotropic drug resistance protein 1 [Medicago truncatula]	up
MruG031964		--	Cellular Component: integral component of membrane (GO:0016021);; Molecular Function: kinase activity (GO:0016301);;	--	--	Leucine rich repeat	Receptor-like protein EIX2 OS=Solanum lycopersicum OX=4081 GN=EIX2 PE=1 SV=2	LRR receptor-like kinase [Medicago truncatula]	up
MruG031529		--	Molecular Function: ubiquitin-protein transferase activity (GO:0004842);; Cellular Component: nucleus (GO:0005634);; Cellular Component: cytoplasm (GO:0005737);; Molecular Function: transferase activity, transferring acyl groups (GO:0016746);; Molecular Function: ligase activity (GO:0016874);;	--	--	Armadillo/beta-catenin-like repeat	U-box domain-containing protein 39 OS=Arabidopsis thaliana OX=3702 GN=PUB39 PE=1 SV=2	U-box domain-containing protein 40 [Medicago truncatula]	up
MruG021503		--	Biological Process: response to auxin (GO:0009733);;	--	--	Auxin responsive protein	Auxin-induced protein 10A5 OS=Glycine max OX=3847 PE=2 SV=1	auxin-induced protein 10A5 [Medicago truncatula]	up
MruG039229		--	Cellular Component: nucleosome (GO:0000786);; Cellular Component: nuclear chromatin (GO:0000790);; Molecular Function: DNA binding (GO:0003677);; Biological Process: chromatin organization (GO:0006325);; Biological Process: chromatin silencing (GO:0006342);; Molecular Function: protein heterodimerization activity (GO:0046982);;	[B]	Chromatin structure and dynamics	C-terminus of histone H2A	Histone H2AX OS=Cicer arietinum OX=3827 GN=HIS2A PE=2 SV=1	putative transcription factor Hap3/NF-YB family [Medicago truncatula]	up
MruG028729		Secondary metabolites biosynthesis, transport and catabolism	Biological Process: response to light stimulus (GO:0009416);; Molecular Function: flavonol synthase activity (GO:0045431);; Molecular Function: metal ion binding (GO:0046872);; Molecular Function: dioxygenase activity (GO:0051213);;	[QR]	Secondary metabolites biosynthesis, transport and catabolism;; General function prediction only	2OG-Fe(II) oxygenase superfamily	Flavonol synthase/flavanone 3-hydroxylase OS=Petunia hybrida OX=4102 GN=FL PE=2 SV=1	flavonol synthase/flavanone 3-hydroxylase [Medicago truncatula]	up
MruG006635		Cell cycle control, cell division, chromosome partitioning;; Inorganic ion transport and metabolism;; Cell wall/membrane/envelope biogenesis	Molecular Function: copper ion binding (GO:0005507);; Molecular Function: bilirubin oxidase activity (GO:0047705);;	--	--	Multicopper oxidase	Multicopper oxidase LPR2 OS=Arabidopsis thaliana OX=3702 GN=LPR2 PE=2 SV=1	multicopper oxidase LPR2 [Medicago truncatula]	up
MruG009756		--	Cellular Component: plasma membrane (GO:0005886);;	--	--	Cysteine-rich TM module stress tolerance	--	cysteine-rich TM module stress tolerance protein [Medicago truncatula]	up
MruG037179		Nucleotide transport and metabolism	Molecular Function: ATP binding (GO:0005524);; Molecular Function: carbohydrate binding (GO:0030246);; Molecular Function: 8-oxo-dGTP phosphohydrolase activity (GO:0102490);;	[F]	Nucleotide transport and metabolism	GDA1/CD39 (nucleoside phosphatase) family	Nucleoside-triphosphatase OS=Pisum sativum OX=3888 PE=2 SV=1	nucleoside-triphosphatase [Medicago truncatula]	up
MruG029321		Secondary metabolites biosynthesis, transport and catabolism;; Defense mechanisms	Molecular Function: monooxygenase activity (GO:0004497);; Molecular Function: iron ion binding (GO:0005506);; Molecular Function: oxidoreductase activity, acting on paired donors, with incorporation or reduction of molecular oxygen (GO:0016705);; Molecular Function: heme binding (GO:0020037);;	[Q]	Secondary metabolites biosynthesis, transport and catabolism	Cytochrome P450	Cytochrome P450 CYP736A12 OS=Panax ginseng OX=4054 PE=2 SV=1	hypothetical protein TSUD_215690 [Trifolium subterraneum]	up
MruG046087		--	Cellular Component: integral component of membrane (GO:0016021);; Biological Process: vesicle-mediated transport (GO:0016192);;	[U]	Intracellular trafficking, secretion, and vesicular transport	Regulated-SNARE-like domain	Vesicle-associated membrane protein 725 OS=Arabidopsis thaliana OX=3702 GN=VAMP725 PE=2 SV=2	vesicle-associated membrane protein 722 [Medicago truncatula]	up
MruG026758		Cell wall/membrane/envelope biogenesis;; Cell cycle control, cell division, chromosome partitioning;; Signal transduction mechanisms	Molecular Function: ATP binding (GO:0005524);; Molecular Function: hydrolase activity (GO:0016787);;	[O]	Posttranslational modification, protein turnover, chaperones	Domain associated at C-terminal with AAA	AAA-ATPase At5g17760 OS=Arabidopsis thaliana OX=3702 GN=At5g17760 PE=3 SV=1	AAA-ATPase At5g17760 [Medicago truncatula]	up
MruG028883		Posttranslational modification, protein turnover, chaperones	Molecular Function: protein binding (GO:0005515);;	--	--	PDZ domain	--	putative protease Do-like 14 [Medicago truncatula]	up
MruG036109		--	--	[S]	Function unknown	Vitamin B6 photo-protection and homoeostasis	Protein root UVB sensitive 5 OS=Arabidopsis thaliana OX=3702 GN=RUS5 PE=2 SV=1	protein root UVB sensitive 5 isoform X1 [Medicago truncatula]	up
MruG047761		--	--	--	--	Albumin I chain a	Albumin-1 OS=Glycine soja OX=3848 PE=3 SV=1	albumin-1 [Medicago truncatula]	up
MruG046505		--	--	--	--	Tetratricopeptide repeat	--	uncharacterized protein LOC11414442 [Medicago truncatula]	up
MruG046768		Coenzyme transport and metabolism	Cellular Component: integral component of membrane (GO:0016021);;	--	--	--	Putative geranylgeranyl pyrophosphate synthase 8, chloroplastic OS=Arabidopsis thaliana OX=3702 GN=At3g14510 PE=5 SV=2	uncharacterized protein LOC11414727 [Medicago truncatula]	up
MruG032888		--	Biological Process: metal ion transport (GO:0030001);; Molecular Function: metal ion binding (GO:0046872);;	[P]	Inorganic ion transport and metabolism	Heavy-metal-associated domain	Heavy metal-associated isoprenylated plant protein 39 OS=Arabidopsis thaliana OX=3702 GN=HIPP39 PE=2 SV=1	heavy metal-associated isoprenylated plant protein 39 [Medicago truncatula]	up
MruG028791		Inorganic ion transport and metabolism	Cellular Component: integral component of plasma membrane (GO:0005887);; Molecular Function: secondary active sulfate transmembrane transporter activity (GO:0008271);; Molecular Function: anion:anion antiporter activity (GO:0015301);;	[P]	Inorganic ion transport and metabolism	Sulfate permease family	Sulfate transporter 1.3 OS=Arabidopsis thaliana OX=3702 GN=SULTR1;3 PE=2 SV=1	sulfate transporter 1.3 [Medicago truncatula]	up
MruG018069		Carbohydrate transport and metabolism	Molecular Function: ATP binding (GO:0005524);; Biological Process: glycogen biosynthetic process (GO:0005978);; Molecular Function: glucose-1-phosphate adenylyltransferase activity (GO:0008878);; Cellular Component: chloroplast (GO:0009507);; Biological Process: starch biosynthetic process (GO:0019252);;	[M]	Cell wall/membrane/envelope biogenesis	Nucleotidyl transferase	Glucose-1-phosphate adenylyltransferase large subunit 2, chloroplastic OS=Arabidopsis thaliana OX=3702 GN=APL2 PE=1 SV=2	glucose-1-phosphate adenylyltransferase large subunit 1 [Medicago truncatula]	up
MruG048686		General function prediction only	--	--	--	Pirin C-terminal cupin domain	Pirin-like protein At1g50590 OS=Arabidopsis thaliana OX=3702 GN=At1g50590 PE=2 SV=1	pirin-like protein [Medicago truncatula]	up
MruG029516		--	Molecular Function: peroxidase activity (GO:0004601);; Cellular Component: extracellular region (GO:0005576);; Biological Process: response to oxidative stress (GO:0006979);; Molecular Function: heme binding (GO:0020037);; Biological Process: hydrogen peroxide catabolic process (GO:0042744);; Molecular Function: metal ion binding (GO:0046872);;	--	--	Peroxidase	Cationic peroxidase 1 OS=Arachis hypogaea OX=3818 GN=PNC1 PE=1 SV=2	peroxidase P7 [Medicago truncatula]	up
MruG042241		--	Biological Process: reproduction (GO:0000003);; Biological Process: nuclear division (GO:0000280);; Cellular Component: cellular_component (GO:0005575);; Cellular Component: intracellular (GO:0005622);; Cellular Component: cell (GO:0005623);; Cellular Component: cytoplasm (GO:0005737);; Biological Process: organelle organization (GO:0006996);; Biological Process: cell cycle (GO:0007049);; Biologi…	--	--	--	Protein POOR HOMOLOGOUS SYNAPSIS 1 OS=Arabidopsis thaliana OX=3702 GN=PHS1 PE=1 SV=1	protein POOR HOMOLOGOUS SYNAPSIS 1 isoform X2 [Medicago truncatula]	up
MruG016939		Inorganic ion transport and metabolism	Cellular Component: membrane (GO:0016020);; Cellular Component: integral component of membrane (GO:0016021);;	--	--	Nodulin-like	--	protein NUCLEAR FUSION DEFECTIVE 4 [Medicago truncatula]	up
MruG006022		--	Molecular Function: DNA binding (GO:0003677);; Cellular Component: nucleus (GO:0005634);;	--	--	B3 DNA binding domain	B3 domain-containing protein Os12g0591400 OS=Oryza sativa subsp. japonica OX=39947 GN=Os12g0591300 PE=2 SV=1	transcriptional factor B3 family protein [Medicago truncatula]	up
MruG039569		--	Cellular Component: plasma membrane (GO:0005886);; Cellular Component: integral component of membrane (GO:0016021);; Molecular Function: transmembrane transporter activity (GO:0022857);;	--	--	EamA-like transporter family	WAT1-related protein At4g30420 OS=Arabidopsis thaliana OX=3702 GN=At4g30420 PE=3 SV=1	WAT1-related protein At4g30420 isoform X2 [Medicago truncatula]	up
MruG018623		--	Cellular Component: endoplasmic reticulum (GO:0005783);; Cellular Component: Golgi apparatus (GO:0005794);; Cellular Component: plasma membrane (GO:0005886);; Cellular Component: integral component of membrane (GO:0016021);;	[T]	Signal transduction mechanisms	--	Putative ALA-interacting subunit 2 OS=Arabidopsis thaliana OX=3702 GN=ALIS2 PE=2 SV=1	LEM3 (ligand-effect modulator 3) family protein [Medicago truncatula]	up
MruG031547		Defense mechanisms	Molecular Function: ATP binding (GO:0005524);; Cellular Component: integral component of membrane (GO:0016021);; Molecular Function: ATPase activity (GO:0016887);; Molecular Function: ATPase activity, coupled to transmembrane movement of substances (GO:0042626);; Biological Process: transmembrane transport (GO:0055085);;	[Q]	Secondary metabolites biosynthesis, transport and catabolism	ABC transporter transmembrane region	ABC transporter B family member 15 OS=Arabidopsis thaliana OX=3702 GN=ABCB15 PE=3 SV=1	ABC transporter B family member 15 [Medicago truncatula]	up
MruG005824		--	--	--	--	--	--	hypothetical protein L195_g031255, partial [Trifolium pratense]	up
MruG041012		Energy production and conversion;; General function prediction only	Molecular Function: 2-alkenal reductase [NAD(P)] activity (GO:0032440);;	[CR]	Energy production and conversion;; General function prediction only	Protein tyrosine and serine/threonine kinase	Serine/threonine-protein kinase CTR1 OS=Arabidopsis thaliana OX=3702 GN=CTR1 PE=1 SV=1	reticulon-4-interacting protein 1, mitochondrial [Medicago truncatula]	up
MruG001067		--	Molecular Function: UDP-glycosyltransferase activity (GO:0008194);; Cellular Component: intracellular membrane-bounded organelle (GO:0043231);;	[GC]	Carbohydrate transport and metabolism;; Energy production and conversion	UDP-glucoronosyl and UDP-glucosyl transferase	Soyasaponin III rhamnosyltransferase OS=Glycine max OX=3847 GN=GmSGT3 PE=1 SV=1	soyasaponin III rhamnosyltransferase [Medicago truncatula]	up
MruG046569		--	Cellular Component: endoplasmic reticulum membrane (GO:0005789);; Cellular Component: endoplasmic reticulum-Golgi intermediate compartment (GO:0005793);; Biological Process: ER to Golgi vesicle-mediated transport (GO:0006888);; Cellular Component: COPII-coated ER to Golgi transport vesicle (GO:0030134);; Cellular Component: integral component of Golgi membrane (GO:0030173);;	[S]	Function unknown	YIF1	--	protein YIF1B-A [Medicago truncatula]	up
MruG016185		Amino acid transport and metabolism	Molecular Function: peptidyltransferase activity (GO:0000048);; Cellular Component: plasma membrane (GO:0005886);; Biological Process: glutathione catabolic process (GO:0006751);; Molecular Function: glutathione hydrolase activity (GO:0036374);;	[E]	Amino acid transport and metabolism	Gamma-glutamyltranspeptidase	Glutathione hydrolase 2 OS=Arabidopsis thaliana OX=3702 GN=GGT2 PE=2 SV=1	gamma-glutamyltranspeptidase [Medicago truncatula]	up
MruG038850		--	--	--	--	Protein of unknown function, DUF538	--	DUF538 family protein [Medicago truncatula]	up
MruG006380		--	Biological Process: telomere maintenance (GO:0000723);; Biological Process: double-strand break repair via homologous recombination (GO:0000724);; Cellular Component: nuclear chromosome, telomeric region (GO:0000784);; Molecular Function: damaged DNA binding (GO:0003684);; Molecular Function: single-stranded DNA binding (GO:0003697);; Cellular Component: DNA replication factor A complex (GO:00056…	[L]	Replication, recombination and repair	Domain of unknown function DUF223	--	replication factor-A carboxy-terminal domain protein [Medicago truncatula]	up
MruG010053		Secondary metabolites biosynthesis, transport and catabolism;; Defense mechanisms	Molecular Function: iron ion binding (GO:0005506);; Cellular Component: membrane (GO:0016020);; Cellular Component: integral component of membrane (GO:0016021);; Molecular Function: oxidoreductase activity, acting on paired donors, with incorporation or reduction of molecular oxygen, NAD(P)H as one donor, and incorporation of one atom of oxygen (GO:0016709);; Molecular Function: heme binding (GO:…	[Q]	Secondary metabolites biosynthesis, transport and catabolism	Cytochrome P450	Geraniol 8-hydroxylase OS=Catharanthus roseus OX=4058 GN=CYP76B6 PE=1 SV=1	geraniol 8-hydroxylase [Medicago truncatula]	up
MruG002803		--	Cellular Component: integral component of membrane (GO:0016021);;	--	--	--	Protein CHUP1, chloroplastic OS=Arabidopsis thaliana OX=3702 GN=CHUP1 PE=1 SV=1	hypothetical protein MtrunA17_Chr1g0179671 [Medicago truncatula]	up
MruG043309		--	Molecular Function: transcription regulatory region sequence-specific DNA binding (GO:0000976);; Molecular Function: RNA polymerase II regulatory region sequence-specific DNA binding (GO:0000977);; Molecular Function: RNA polymerase II transcription factor activity, sequence-specific DNA binding (GO:0000981);; Cellular Component: nucleus (GO:0005634);; Molecular Function: transcription factor bin…	[K]	Transcription	SRF-type transcription factor (DNA-binding and dimerisation domain)	Agamous-like MADS-box protein AGL19 OS=Arabidopsis thaliana OX=3702 GN=AGL19 PE=1 SV=1	agamous-like MADS-box protein AGL19 isoform X1 [Medicago truncatula]	up
MruG018900		--	--	--	--	--	SH3 domain-containing protein 3 OS=Arabidopsis thaliana OX=3702 GN=SH3P3 PE=1 SV=1	clathrin-binding protein [Medicago truncatula]	up
MruG031834		Carbohydrate transport and metabolism	Molecular Function: UDP-glycosyltransferase activity (GO:0008194);; Cellular Component: intracellular membrane-bounded organelle (GO:0043231);; Molecular Function: quercetin 3-O-glucosyltransferase activity (GO:0080043);; Molecular Function: quercetin 7-O-glucosyltransferase activity (GO:0080044);;	[GC]	Carbohydrate transport and metabolism;; Energy production and conversion	UDP-glucoronosyl and UDP-glucosyl transferase	7-deoxyloganetin glucosyltransferase OS=Gardenia jasminoides OX=114476 GN=UGT85A24 PE=1 SV=1	7-deoxyloganetin glucosyltransferase [Medicago truncatula]	up
MruG031826		Carbohydrate transport and metabolism	Molecular Function: UDP-glycosyltransferase activity (GO:0008194);; Cellular Component: intracellular membrane-bounded organelle (GO:0043231);; Molecular Function: quercetin 3-O-glucosyltransferase activity (GO:0080043);; Molecular Function: quercetin 7-O-glucosyltransferase activity (GO:0080044);;	[GC]	Carbohydrate transport and metabolism;; Energy production and conversion	UDP-glucoronosyl and UDP-glucosyl transferase	7-deoxyloganetin glucosyltransferase OS=Gardenia jasminoides OX=114476 GN=UGT85A24 PE=1 SV=1	7-deoxyloganetin glucosyltransferase [Medicago truncatula]	up
MruG007210		--	--	--	--	PDDEXK-like family of unknown function	--	uncharacterized protein LOC11423944 [Medicago truncatula]	up
MruG031738		--	--	--	--	Zinc knuckle	--	uncharacterized protein LOC25499480 [Medicago truncatula]	up
MruG042733		Signal transduction mechanisms	Molecular Function: protein serine/threonine kinase activity (GO:0004674);; Molecular Function: ATP binding (GO:0005524);; Cellular Component: plasma membrane (GO:0005886);; Biological Process: protein phosphorylation (GO:0006468);; Biological Process: cell surface receptor signaling pathway (GO:0007166);; Cellular Component: integral component of membrane (GO:0016021);;	[T]	Signal transduction mechanisms	Protein kinase domain	Wall-associated receptor kinase-like 14 OS=Arabidopsis thaliana OX=3702 GN=WAKL14 PE=2 SV=2	wall-associated receptor kinase-like 14 [Medicago truncatula]	up
MruG016995		Inorganic ion transport and metabolism	Biological Process: regulation of pH (GO:0006885);; Cellular Component: endomembrane system (GO:0012505);; Molecular Function: solute:proton antiporter activity (GO:0015299);; Biological Process: monovalent inorganic cation transport (GO:0015672);; Cellular Component: integral component of membrane (GO:0016021);;	[P]	Inorganic ion transport and metabolism	Sodium/hydrogen exchanger family	Cation/H(+) antiporter 4 OS=Arabidopsis thaliana OX=3702 GN=CHX4 PE=2 SV=1	cation/H(+) antiporter 4 [Medicago truncatula]	up
MruG015615		Secondary metabolites biosynthesis, transport and catabolism	Molecular Function: copper ion binding (GO:0005507);; Molecular Function: primary amine oxidase activity (GO:0008131);; Biological Process: amine metabolic process (GO:0009308);; Cellular Component: integral component of membrane (GO:0016021);; Molecular Function: quinone binding (GO:0048038);;	[Q]	Secondary metabolites biosynthesis, transport and catabolism	Copper amine oxidase, enzyme domain	Primary amine oxidase OS=Arabidopsis thaliana OX=3702 GN=At1g62810 PE=2 SV=1	primary amine oxidase [Medicago truncatula]	up
MruG025281		--	--	--	--	--	--	hypothetical protein MTR_8g105190 [Medicago truncatula]	up
MruG003627		--	Cellular Component: nucleus (GO:0005634);; Biological Process: negative regulation of transcription, DNA-templated (GO:0045892);;	--	--	Transcriptional repressor, ovate	Transcription repressor OFP16 OS=Arabidopsis thaliana OX=3702 GN=OFP16 PE=2 SV=1	putative transcription factor OFP family [Medicago truncatula]	up
MruG021539		--	Biological Process: response to auxin (GO:0009733);;	--	--	Auxin responsive protein	Auxin-induced protein 6B OS=Glycine max OX=3847 PE=2 SV=1	hypothetical protein TSUD_320140 [Trifolium subterraneum]	up
MruG043363		--	Biological Process: cytoplasmic translational termination (GO:0002184);; Cellular Component: cytosol (GO:0005829);; Molecular Function: translation release factor activity, codon specific (GO:0016149);; Cellular Component: translation release factor complex (GO:0018444);; Molecular Function: sequence-specific mRNA binding (GO:1990825);;	--	--	--	--	eukaryotic peptide chain release factor subunit 1-3 [Medicago truncatula]	up
MruG025671		--	Biological Process: DNA synthesis involved in DNA repair (GO:0000731);; Biological Process: DNA-dependent DNA replication (GO:0006261);; Cellular Component: host cell nucleus (GO:0042025);; Cellular Component: delta DNA polymerase complex (GO:0043625);;	--	--	DNA polymerase delta, subunit 4	--	DNA polymerase delta subunit 4 [Medicago truncatula]	up
MruG041945		Secondary metabolites biosynthesis, transport and catabolism;; Defense mechanisms	Molecular Function: iron ion binding (GO:0005506);; Cellular Component: membrane (GO:0016020);; Cellular Component: integral component of membrane (GO:0016021);; Molecular Function: oxidoreductase activity, acting on paired donors, with incorporation or reduction of molecular oxygen, NAD(P)H as one donor, and incorporation of one atom of oxygen (GO:0016709);; Molecular Function: heme binding (GO:…	[Q]	Secondary metabolites biosynthesis, transport and catabolism	Cytochrome P450	Cytochrome P450 89A2 OS=Arabidopsis thaliana OX=3702 GN=CYP89A2 PE=2 SV=2	cytochrome P450 89A2 [Medicago truncatula]	up
MruG000040		Carbohydrate transport and metabolism	Molecular Function: zinc ion binding (GO:0008270);; Biological Process: lignin biosynthetic process (GO:0009809);; Molecular Function: oxidoreductase activity, acting on the CH-OH group of donors, NAD or NADP as acceptor (GO:0016616);; Molecular Function: cinnamyl-alcohol dehydrogenase activity (GO:0045551);; Molecular Function: sinapyl alcohol dehydrogenase activity (GO:0052747);;	[Q]	Secondary metabolites biosynthesis, transport and catabolism	Alcohol dehydrogenase GroES-like domain	Probable cinnamyl alcohol dehydrogenase 6 OS=Oryza sativa subsp. japonica OX=39947 GN=CAD6 PE=2 SV=2	probable cinnamyl alcohol dehydrogenase 6 [Medicago truncatula]	up
MruG010026		--	Molecular Function: endopeptidase inhibitor activity (GO:0004866);;	--	--	Trypsin and protease inhibitor	Kunitz type trypsin inhibitor 106 OS=Medicago truncatula OX=3880 GN=KPI106 PE=1 SV=1	alpha-amylase/subtilisin inhibitor [Medicago truncatula]	up
MruG031784		--	Molecular Function: UDP-glycosyltransferase activity (GO:0008194);; Cellular Component: intracellular membrane-bounded organelle (GO:0043231);; Molecular Function: quercetin 3-O-glucosyltransferase activity (GO:0080043);; Molecular Function: quercetin 7-O-glucosyltransferase activity (GO:0080044);;	[GC]	Carbohydrate transport and metabolism;; Energy production and conversion	--	7-deoxyloganetin glucosyltransferase OS=Gardenia jasminoides OX=114476 GN=UGT85A24 PE=1 SV=1	7-deoxyloganetin glucosyltransferase isoform X1 [Medicago truncatula]	up
MruG041456		Carbohydrate transport and metabolism	Molecular Function: UDP-glycosyltransferase activity (GO:0008194);; Cellular Component: intracellular membrane-bounded organelle (GO:0043231);; Molecular Function: soyasapogenol B glucuronide galactosyltransferase activity (GO:0102240);;	[GC]	Carbohydrate transport and metabolism;; Energy production and conversion	UDP-glucoronosyl and UDP-glucosyl transferase	Soyasapogenol B glucuronide galactosyltransferase OS=Glycine max OX=3847 GN=GmSGT2 PE=1 SV=1	soyasapogenol B glucuronide galactosyltransferase [Medicago truncatula]	up
MruG017157		--	Molecular Function: GDP-mannose transmembrane transporter activity (GO:0005458);; Cellular Component: Golgi apparatus (GO:0005794);; Molecular Function: antiporter activity (GO:0015297);; Cellular Component: integral component of membrane (GO:0016021);; Molecular Function: transmembrane transporter activity (GO:0022857);;	[GOU]	Carbohydrate transport and metabolism;; Posttranslational modification, protein turnover, chaperones;; Intracellular trafficking, secretion, and vesicular transport	Triose-phosphate Transporter family	GDP-mannose transporter GONST1 OS=Arabidopsis thaliana OX=3702 GN=GONST1 PE=1 SV=2	GDP-mannose transporter GONST1 isoform X1 [Medicago truncatula]	up
MruG000259		--	Molecular Function: calcium channel activity (GO:0005262);; Molecular Function: uniporter activity (GO:0015292);; Cellular Component: integral component of mitochondrial inner membrane (GO:0031305);; Biological Process: mitochondrial calcium uptake (GO:0036444);; Biological Process: mitochondrial calcium ion homeostasis (GO:0051560);; Cellular Component: uniplex complex (GO:1990246);;	[R]	General function prediction only	Mitochondrial calcium uniporter	Calcium uniporter protein 4, mitochondrial OS=Arabidopsis thaliana OX=3702 GN=At5g42610 PE=2 SV=1	calcium uniporter protein 4, mitochondrial [Medicago truncatula]	up
MruG017402		Posttranslational modification, protein turnover, chaperones	Cellular Component: integral component of membrane (GO:0016021);;	--	--	DnaJ domain	--	uncharacterized protein LOC25490001 [Medicago truncatula]	up
MruG012250		Amino acid transport and metabolism	Molecular Function: channel activity (GO:0015267);; Cellular Component: integral component of membrane (GO:0016021);;	[G]	Carbohydrate transport and metabolism	Major intrinsic protein	Probable aquaporin NIP-type OS=Nicotiana alata OX=4087 PE=2 SV=1	probable aquaporin NIP-type [Medicago truncatula]	up
MruG003233		--	Molecular Function: peroxidase activity (GO:0004601);; Cellular Component: extracellular region (GO:0005576);; Biological Process: response to oxidative stress (GO:0006979);; Molecular Function: heme binding (GO:0020037);; Biological Process: hydrogen peroxide catabolic process (GO:0042744);; Molecular Function: metal ion binding (GO:0046872);;	--	--	Peroxidase	Peroxidase 53 OS=Arabidopsis thaliana OX=3702 GN=PER53 PE=1 SV=1	peroxidase A2 [Medicago truncatula]	up
MruG013684		Translation, ribosomal structure and biogenesis	Biological Process: mRNA splicing, via spliceosome (GO:0000398);; Molecular Function: RNA binding (GO:0003723);; Molecular Function: helicase activity (GO:0004386);; Molecular Function: ATP binding (GO:0005524);; Cellular Component: spliceosomal complex (GO:0005681);;	[A]	RNA processing and modification	Helicase associated domain (HA2)	Pre-mRNA-splicing factor ATP-dependent RNA helicase DEAH7 OS=Arabidopsis thaliana OX=3702 GN=CUV PE=1 SV=1	putative RNA helicase [Medicago truncatula]	up
MruG032470		Lipid transport and metabolism;; Secondary metabolites biosynthesis, transport and catabolism	Biological Process: fatty acid metabolic process (GO:0006631);; Cellular Component: plasmodesma (GO:0009506);; Cellular Component: chloroplast stroma (GO:0009570);; Biological Process: positive regulation of seed germination (GO:0010030);; Biological Process: seed coat development (GO:0010214);; Molecular Function: medium-chain fatty acid-CoA ligase activity (GO:0031956);; Biological Process: oxa…	[I]	Lipid transport and metabolism	AMP-binding enzyme	Oxalate--CoA ligase OS=Arabidopsis thaliana OX=3702 GN=AAE3 PE=1 SV=1	oxalate--CoA ligase [Medicago truncatula]	up
MruG002703		--	Cellular Component: Golgi membrane (GO:0000139);; Molecular Function: SNAP receptor activity (GO:0005484);; Cellular Component: Golgi medial cisterna (GO:0005797);; Cellular Component: cis-Golgi network (GO:0005801);; Biological Process: ER to Golgi vesicle-mediated transport (GO:0006888);; Biological Process: vesicle fusion (GO:0006906);; Biological Process: protein transport (GO:0015031);; Cell…	[U]	Intracellular trafficking, secretion, and vesicular transport	--	Golgi SNAP receptor complex member 1-1 OS=Arabidopsis thaliana OX=3702 GN=GOS11 PE=2 SV=1	SNAP receptor complex protein [Medicago truncatula]	up
MruG027897		--	Cellular Component: plasma membrane (GO:0005886);; Molecular Function: peptide:proton symporter activity (GO:0015333);; Cellular Component: integral component of membrane (GO:0016021);; Molecular Function: oligopeptide transmembrane transporter activity (GO:0035673);; Molecular Function: peptide transmembrane transporter activity (GO:1904680);;	[E]	Amino acid transport and metabolism	POT family	Protein NRT1/ PTR FAMILY 2.13 OS=Arabidopsis thaliana OX=3702 GN=NPF2.13 PE=1 SV=1	protein NRT1/ PTR FAMILY 2.13 [Medicago truncatula]	up
MruG036843		--	Cellular Component: integral component of membrane (GO:0016021);;	--	--	--	--	hypothetical protein MtrDRAFT_AC149129g40v2 [Medicago truncatula]	up
MruG048586		--	--	--	--	SOUL heme-binding protein	--	heme-binding-like protein At3g10130, chloroplastic [Medicago truncatula]	up
MruG047140		Coenzyme transport and metabolism;; Energy production and conversion	Cellular Component: integral component of membrane (GO:0016021);; Molecular Function: 2-hydroxybiphenyl 3-monooxygenase activity (GO:0047544);; Molecular Function: FAD binding (GO:0071949);; Molecular Function: 2,2'-hydroxybiphenyl monooxygenase activity (GO:0102321);;	[HC]	Coenzyme transport and metabolism;; Energy production and conversion	FAD binding domain	--	uncharacterized protein LOC11427111 [Medicago truncatula]	up
MruG034396		--	--	--	--	--	--	uncharacterized protein LOC25497451 [Medicago truncatula]	up
MruG040398		Lipid transport and metabolism;; General function prediction only	Cellular Component: vacuolar membrane (GO:0005774);; Molecular Function: lipase activity (GO:0016298);;	--	--	GDSL-like Lipase/Acylhydrolase	GDSL esterase/lipase 5 OS=Arabidopsis thaliana OX=3702 GN=GLIP5 PE=2 SV=2	GDSL esterase/lipase 1 [Medicago truncatula]	up
MruG027688		General function prediction only	Cellular Component: nucleus (GO:0005634);; Biological Process: dGTP catabolic process (GO:0006203);; Molecular Function: dGTPase activity (GO:0008832);;	[S]	Function unknown	HD domain	--	deoxynucleoside triphosphate triphosphohydrolase SAMHD1 homolog [Medicago truncatula]	up
MruG030984		Inorganic ion transport and metabolism	Cellular Component: integral component of plasma membrane (GO:0005887);; Cellular Component: plant-type vacuole membrane (GO:0009705);; Molecular Function: potassium ion leak channel activity (GO:0022841);; Biological Process: cellular potassium ion homeostasis (GO:0030007);; Biological Process: stabilization of membrane potential (GO:0030322);; Biological Process: potassium ion transmembrane tra…	[P]	Inorganic ion transport and metabolism	Ion channel	Two-pore potassium channel 1 OS=Arabidopsis thaliana OX=3702 GN=TPK1 PE=1 SV=2	two-pore potassium channel 1 [Medicago truncatula]	up
MruG023465		Secondary metabolites biosynthesis, transport and catabolism	Molecular Function: methyltransferase activity (GO:0008168);; Biological Process: methylation (GO:0032259);; Molecular Function: metal ion binding (GO:0046872);; Molecular Function: thebaine 6-O-demethylase activity (GO:0102802);; Molecular Function: oripavine 6-O-demethylase activity (GO:0102804);;	[QR]	Secondary metabolites biosynthesis, transport and catabolism;; General function prediction only	non-haem dioxygenase in morphine synthesis N-terminal	Probable 2-oxoglutarate/Fe(II)-dependent dioxygenase OS=Papaver somniferum OX=3469 GN=DIOX2 PE=2 SV=1	putative thebaine 6-O-demethylase [Medicago truncatula]	up
MruG003928		--	Biological Process: G-protein coupled receptor signaling pathway (GO:0007186);;	--	--	GGL domain	Guanine nucleotide-binding protein subunit gamma 2 OS=Arabidopsis thaliana OX=3702 GN=GG2 PE=1 SV=1	guanine nucleotide-binding protein subunit gamma 2 [Medicago truncatula]	up
MruG039035		Function unknown	Cellular Component: integral component of membrane (GO:0016021);;	[R]	General function prediction only	Proteolipid membrane potential modulator	Hydrophobic protein RCI2B OS=Arabidopsis thaliana OX=3702 GN=RCI2B PE=2 SV=1	hydrophobic protein RCI2B [Medicago truncatula]	up
MruG012304		--	Cellular Component: cytoplasm (GO:0005737);; Biological Process: cell division (GO:0051301);;	[S]	Function unknown	D123	--	cell division cycle protein 123 homolog [Medicago truncatula]	up
MruG024375		--	Molecular Function: DNA binding (GO:0003677);; Molecular Function: endonuclease activity (GO:0004519);; Cellular Component: nucleus (GO:0005634);; Biological Process: DNA repair (GO:0006281);; Biological Process: response to UV (GO:0009411);; Biological Process: response to high light intensity (GO:0009644);; Biological Process: response to gamma radiation (GO:0010332);; Cellular Component: Holli…	--	--	ERCC4 domain	Crossover junction endonuclease EME1B OS=Arabidopsis thaliana OX=3702 GN=EME1B PE=1 SV=1	crossover junction endonuclease EME1 [Medicago truncatula]	up
MruG023788		--	--	--	--	Protein of unknown function, DUF538	--	uncharacterized protein LOC11411259 [Medicago truncatula]	up
MruG019350		Amino acid transport and metabolism	Molecular Function: glutamate 5-kinase activity (GO:0004349);; Molecular Function: glutamate-5-semialdehyde dehydrogenase activity (GO:0004350);; Molecular Function: ATP binding (GO:0005524);; Cellular Component: cytoplasm (GO:0005737);; Biological Process: L-proline biosynthetic process (GO:0055129);;	[E]	Amino acid transport and metabolism	Amino acid kinase family	Delta-1-pyrroline-5-carboxylate synthase OS=Actinidia deliciosa OX=3627 PE=2 SV=1	delta-1-pyrroline-5-carboxylate synthase isoform X2 [Medicago truncatula]	up
MruG005977		Cell cycle control, cell division, chromosome partitioning;; Inorganic ion transport and metabolism;; Cell wall/membrane/envelope biogenesis	Molecular Function: copper ion binding (GO:0005507);; Molecular Function: bilirubin oxidase activity (GO:0047705);;	--	--	Multicopper oxidase	Multicopper oxidase LPR2 OS=Arabidopsis thaliana OX=3702 GN=LPR2 PE=2 SV=1	multicopper oxidase LPR2 [Medicago truncatula]	up
MruG009259		Carbohydrate transport and metabolism	Cellular Component: endoplasmic reticulum (GO:0005783);; Biological Process: biosynthetic process (GO:0009058);; Cellular Component: integral component of membrane (GO:0016021);; Molecular Function: strictosidine synthase activity (GO:0016844);;	[R]	General function prediction only	Strictosidine synthase	Protein STRICTOSIDINE SYNTHASE-LIKE 5 OS=Arabidopsis thaliana OX=3702 GN=SSL5 PE=2 SV=1	protein STRICTOSIDINE SYNTHASE-LIKE 4 [Medicago truncatula]	up
MruG003402		--	Cellular Component: exocyst (GO:0000145);; Biological Process: exocytosis (GO:0006887);;	[U]	Intracellular trafficking, secretion, and vesicular transport	--	Exocyst complex component EXO84C OS=Arabidopsis thaliana OX=3702 GN=EXO84C PE=2 SV=1	exocyst complex component EXO84B [Medicago truncatula]	up
MruG035272		--	Biological Process: metal ion transport (GO:0030001);; Molecular Function: metal ion binding (GO:0046872);;	[P]	Inorganic ion transport and metabolism	Heavy-metal-associated domain	--	leucine-rich repeat extensin-like protein 1 [Cicer arietinum]	up
MruG004252		--	Cellular Component: nucleus (GO:0005634);; Biological Process: histone H3-K18 acetylation (GO:0043971);; Biological Process: DNA demethylation (GO:0080111);; Biological Process: positive regulation of DNA demethylation (GO:1901537);;	--	--	Hsp20/alpha crystallin family	Increased DNA methylation 2 OS=Arabidopsis thaliana OX=3702 GN=IDM2 PE=1 SV=1	increased DNA methylation 2 [Medicago truncatula]	up
MruG010047		--	Cellular Component: nucleus (GO:0005634);; Biological Process: regulation of transcription, DNA-templated (GO:0006355);; Molecular Function: zinc ion binding (GO:0008270);; Biological Process: photomorphogenesis (GO:0009640);; Biological Process: shade avoidance (GO:0009641);; Biological Process: chloroplast organization (GO:0009658);; Biological Process: anthocyanin-containing compound biosynthe…	--	--	B-box zinc finger	B-box zinc finger protein 22 OS=Arabidopsis thaliana OX=3702 GN=BBX22 PE=1 SV=2	B-box zinc finger protein 22 [Medicago truncatula]	up
MruG036461		Cell wall/membrane/envelope biogenesis	Molecular Function: oxidoreductase activity (GO:0016491);; Molecular Function: oxidoreductase activity, acting on the CH-OH group of donors, NAD or NADP as acceptor (GO:0016616);;	[V]	Defense mechanisms	NAD dependent epimerase/dehydratase family	Vestitone reductase OS=Medicago sativa OX=3879 PE=1 SV=1	vestitone reductase [Medicago truncatula]	up
MruG015450		General function prediction only	Cellular Component: mitochondrion (GO:0005739);; Molecular Function: protein disulfide oxidoreductase activity (GO:0015035);; Biological Process: tissue regeneration (GO:0042246);;	--	--	Protein of unknown function, DUF393	Uncharacterized protein At5g50100, chloroplastic OS=Arabidopsis thaliana OX=3702 GN=At5g50100 PE=1 SV=1	uncharacterized protein At5g50100, chloroplastic [Medicago truncatula]	up
MruG029263		--	Cellular Component: chloroplast (GO:0009507);;	--	--	Thylakoid soluble phosphoprotein TSP9	--	uncharacterized protein LOC11411948 [Medicago truncatula]	up
MruG004145		--	Molecular Function: nucleic acid binding (GO:0003676);; Cellular Component: nucleus (GO:0005634);; Molecular Function: zinc ion binding (GO:0008270);;	[A]	RNA processing and modification	Lateral organ boundaries (LOB) domain	LOB domain-containing protein 11 OS=Arabidopsis thaliana OX=3702 GN=LBD11 PE=2 SV=2	hypothetical protein TSUD_353790 [Trifolium subterraneum]	up
MruG018449		Secondary metabolites biosynthesis, transport and catabolism	Molecular Function: methyltransferase activity (GO:0008168);; Molecular Function: oxidoreductase activity (GO:0016491);; Biological Process: methylation (GO:0032259);; Molecular Function: metal ion binding (GO:0046872);;	[QR]	Secondary metabolites biosynthesis, transport and catabolism;; General function prediction only	2OG-Fe(II) oxygenase superfamily	Probable 2-oxoglutarate/Fe(II)-dependent dioxygenase OS=Papaver somniferum OX=3469 GN=DIOX2 PE=2 SV=1	hypothetical protein GLYMA_04G008600 [Glycine max]	up
MruG008659		--	Molecular Function: protein phosphatase inhibitor activity (GO:0004864);; Cellular Component: nucleus (GO:0005634);; Cellular Component: cytoplasm (GO:0005737);; Biological Process: defense response (GO:0006952);; Biological Process: response to biotic stimulus (GO:0009607);; Biological Process: abscisic acid-activated signaling pathway (GO:0009738);; Molecular Function: abscisic acid binding (GO…	--	--	Pathogenesis-related protein Bet v 1 family	ABA-responsive protein ABR17 OS=Pisum sativum OX=3888 PE=2 SV=1	ABA-responsive protein ABR17 isoform X2 [Medicago truncatula]	up
MruG001345		--	Cellular Component: cytoplasm (GO:0005737);; Molecular Function: methyltransferase activity (GO:0008168);; Cellular Component: integral component of membrane (GO:0016021);; Biological Process: methylation (GO:0032259);;	--	--	Putative S-adenosyl-L-methionine-dependent methyltransferase	Probable methyltransferase PMT10 OS=Arabidopsis thaliana OX=3702 GN=At1g77260 PE=2 SV=1	probable methyltransferase PMT10 [Medicago truncatula]	up
MruG015505		--	Molecular Function: oxidoreductase activity, acting on single donors with incorporation of molecular oxygen, incorporation of two atoms of oxygen (GO:0016702);; Biological Process: oxylipin biosynthetic process (GO:0031408);; Biological Process: lipid oxidation (GO:0034440);; Molecular Function: metal ion binding (GO:0046872);;	--	--	Lipoxygenase	Linoleate 13S-lipoxygenase 2-1, chloroplastic OS=Solanum tuberosum OX=4113 GN=LOX2.1 PE=1 SV=1	linoleate 13S-lipoxygenase 2-1, chloroplastic [Medicago truncatula]	up
MruG030746		--	Molecular Function: RNA binding (GO:0003723);; Molecular Function: translation initiation factor activity (GO:0003743);;	[J]	Translation, ribosomal structure and biogenesis	Translation initiation factor SUI1	Protein translation factor SUI1 homolog OS=Zea mays OX=4577 GN=TIF PE=3 SV=1	protein translation factor SUI1 homolog [Medicago truncatula]	up
MruG049891		--	Biological Process: flower development (GO:0009908);; Biological Process: vegetative to reproductive phase transition of meristem (GO:0010228);;	[R]	General function prediction only	Phosphatidylethanolamine-binding protein	CEN-like protein 1 OS=Nicotiana tabacum OX=4097 GN=CET1 PE=2 SV=1	CEN-like protein 1 isoform X1 [Medicago truncatula]	up
MruG010140		--	Biological Process: response to red or far red light (GO:0009639);; Biological Process: negative gravitropism (GO:0009959);;	--	--	Plant protein of unknown function (DUF641)	Protein GRAVITROPIC IN THE LIGHT 1 OS=Arabidopsis thaliana OX=3702 GN=GIL1 PE=1 SV=1	protein GRAVITROPIC IN THE LIGHT 1 [Medicago truncatula]	up
MruG015613		Secondary metabolites biosynthesis, transport and catabolism	Molecular Function: copper ion binding (GO:0005507);; Molecular Function: primary amine oxidase activity (GO:0008131);; Biological Process: amine metabolic process (GO:0009308);; Cellular Component: integral component of membrane (GO:0016021);; Molecular Function: quinone binding (GO:0048038);;	[Q]	Secondary metabolites biosynthesis, transport and catabolism	Copper amine oxidase, enzyme domain	Primary amine oxidase OS=Arabidopsis thaliana OX=3702 GN=At1g62810 PE=2 SV=1	primary amine oxidase [Medicago truncatula]	up
[truncated: 957 more rows]

## Sheet: Table S7
Table S7 Down regulated genes in YFM vs PFM
Gene ID	Original Gene ID	COG_class_annotation	GO_annotation	KOG_class	KOG_class_annotation	Pfam_annotation	Swiss-Prot_annotation	NR_annotation	regulated
[truncated: 1,626 more rows]

## Sheet: Table S8
Table S8. Specific quantitative primers for qRT-PCR
[truncated: 25 more rows]
